# Supplementary material for: De novo Transcriptome Profiling of Flowers, Flower Pedicels and Pods of Lupinus luteus (Yellow Lupine) Reveals Complex Expression Changes during Organ Abscission
Source: Front Plant Sci. 2017 May 2;8:641. doi: 10.3389/fpls.2017.00641 (PMC5412092; doi:10.3389/fpls.2017.00641)
Supplement: Table S1 — List of primers used for the RT-qPCR validation and the RT-qPCR validation results. [file DataSheet1.XLSX]

## Sheet: Table S1
Table S1. List of primers used for the RT-qPCR validation and RT-qPCR validation results.
	Gene	Unigene	Primer	%GC	Tm	Amplicon length	Sequence (5’ → 3’)	UPL probe
	QKY	c51606_g1_i1	forward	48	60	77 nt	CCTCGTGCAACCACATTATTC	5
			reverse	48	59		AGCATCTGGAAGGGTATCACA
	EGL11	c55641_g3_i3	forward	45	59	60 nt	CCAAATGTGTTATGGGCAGA	9
			reverse	43	59		CCTTTGCCAACAATAATGGTC
	PPA2	c86078_g1_i1	forward	39	60	77 nt	TCTTTGAGCCTTAAACTTGGACA	9
			reverse	45	60		TCCAATGAGGATGAGAAGAGGT
	MIR169	c125095_g1_i1	forward	38	59	92 nt	AGCTTCATGTCTATGGTACCTTATTG	145
			reverse	35	59		AAATTGGATTTTCCCTCTCAAAG
	TADA	c107017_g1_i1	forward	39	59	93 nt	TTGAAGAGGCATATAAAGGGGTA	49
			reverse	44	59		TGTGAGAGCTAGCAACTACTTCATC
	ACA13	c16039_g1_i1	forward	55	59	75 nt	GGTATACTCCAGCCGAACCA	55
			reverse	61	60		CTCGGGCGTGTAGTTTCG
	ZAT12	c29048_g1_i1	forward	43	59	70 nt	CATTGAGTTTGTGTCTGGACTTG	49
			reverse	43	59		CAAACAGGTTTCCTTGGCTTA
	5PTASE11	c3490_g1_i1	forward	36	59	83 nt	ACTTATACCTGTTTGGGACAAAGAA	9
			reverse	48	59		TCCATAGCCACCAACAGATTC
	RCI2B	c51152_g1_i3	forward	55	59	62 nt	AGAGGGGGAAGGATGATAGC	88
			reverse	55	60		ATGGCCAGTGAAGGTACAGC
	DC2.15	c52215_g2_i1	forward	50	60	72 nt	GCCTATGCACTGCCCTAAAA	105
			reverse	43	60		GAAGCAAGCTAAGTGAGATTGGA
	SPX3	c53596_g1_i1	forward	35	59	78 nt	GATGAAATTTGGGAAGAGATTGA	140
			reverse	35	60		TTGTAACATAAGTAATTGTCCCTCCA
	ACT		forward	48	59	60 nt	TGGACGTACTACAGGTATTGTGC	9
			reverse	55	60		ATGGGCACTGTATGGCTCAC

## Sheet: Table S2, S3 
Table S2. Quality filtering and statistics of raw reads obtained in eight transcriptome libraries of L. luteus.
	Sample	No. of raw reads	No. of HQ reads	Percentage (%)	Mapped reads	Percentage mapping (%)
	FNAB	47775190	47402514	0.992199	38045058	0.802596
	FAB	51120000	50553456	0.988917	40472816	0.800594
	FPNAB	51307472	50424076	0.982782	39734236	0.788001
	FPAB	46619042	46026084	0.987281	36790092	0.799331
	PNAB	47393010	46840330	0.988338	38035000	0.812014
	PAB	56784288	55972282	0.9857	45553118	0.813851
Table S3. Statistical analysis of differentially expressed gene in compared libraries of L. luteus.
	Type	FAB_vs_FNAB	FPAB_vs_FPNAB	PAB_vs_PNAB
	Total number of DEGs	1343	2933	1491
	No. of up-regulated unigenes	1018	1221	365
	No. of down-regulateduni genes	325	1712	1126
	No. of DEGs with [log2 ratio] ≥ 5	297	308	128

## Sheet: Table S4
Table S4. Differential expression patterns of cell wall-related genes in comparison of libraries FAB vs FNAB, FPAB vs FPNAB, PAB vs PNAB.
Comparison	Unigene ID	FC	log2FC	UniProt Acc. No	Gene description
FAB vs FNAB
	Expansins
	c57970_g5	92.2802	6.52795	O80622	Expansin-A15
	c57970_g2	22.7884	4.51023	Q9LDR9	Expansin-A10
	c33318_g1	22.0359	4.46178	Q9M0I2	Expansin-B3
	Xyloglucan endotransglucosylase/hydrolases
	c16186_g1	28.1517	4.81515	Q8LF99	Probable xyloglucan endotransglucosylase/hydrolase protein 6
	Endoglucanases
	c55641_g3	19.1579	4.25987	O48766	Endoglucanase 11
	c61550_g1	0.016257	-5.94279	P23548	Endoglucanase
	Polygalacturonases
	c57004_g2	41.2378	5.3659	A7PZL3	Probable polygalacturonase
	c60450_g2	34.978	5.12837	Q949Z1	Polygalacturonase
	c81688_g1	20.7098	4.37224	P92982	Probable polygalacturonase non-catalytic subunit JP630
	c54125_g2	18.6413	4.22043	Q949Z1	Polygalacturonase At1g48100
	c61054_g3	15.3942	3.94432	A7PZL3	Probable polygalacturonase
	Beta-galactosidases
	c111320_g1	21.7833	4.44515	Q9SCV9	Beta-galactosidase 3
	c61607_g1	18.5109	4.2103	Q9SCV9	Beta-galactosidase 3
	c61607_g7	16.3736	4.0333	Q9MAJ7	Beta-galactosidase 5
	c51121_g2	0.0185704	-5.75085	Q8GX69	Beta-galactosidase 16
	Pectinesterases
	c108186_g1	54.2835	5.76244	P09607	Pectinesterase 2.1
	c37150_g2	49.0985	5.61761	Q96575	Pectinesterase 2.2
	c106687_g1	32.5799	5.02591	O49298	Probable pectinesterase/pectinesterase inhibitor 6
	c92562_g1	28.5774	4.8368	P83948	Pectinesterase 3
	c122003_g1	22.9233	4.51875	Q8LPF3	Probable pectinesterase 68
	c62139_g6	19.402	4.27814	O81301	Probable pectinesterase/pectinesterase inhibitor 40
	c61811_g1	18.643	4.22056	O48711	Probable pectinesterase/pectinesterase inhibitor 12
	c55594_g1	0.0720496	-3.79487	O04953	Putative pectinesterase 52
	c17007_g1	0.0550724	-4.18253	O04887	Pectinesterase 2
	c80851_g1	0.0532709	-4.23051	Q9FHN4	Probable pectinesterase/pectinesterase inhibitor 60
	Pectin acetylesterases
	c50255_g1	17.286	4.11153	Q66GM8	Pectin acetylesterase 10
	Pectate lyases
	c92195_g1	16.4411	4.03923	Q9SCP2	Probable pectate lyase 12
FPAB vs FPNAB
	Expansins
	c57970_g5	40.3317	5.33384	O80622	Expansin-A15
	c59220_g3	14.2198	3.82983	Q9SZM1	Expansin-A20
	c59220_g2	11.8316	3.56458	Q69XV9	Expansin-A16
	c58276_g2	10.972	3.45575	Q9LNU3	Expansin-A11
	c65414_g1	9.99511	3.32122	Q9M0I2	Expansin-B3
	c42610_g2	8.75464	3.13005	O48818	Expansin-A4
	c10258_g1	7.49932	2.90676	O80932	Expansin-A3
	c57970_g2	7.46049	2.89927	Q9LDR9	Expansin-A10
	c94968_g1	6.98539	2.80434	O48818	Expansin-A4
	c93265_g1	0.104115	-3.26374	Q850K7	Expansin-like B1
	c47457_g1	0.007954	-6.9741	O23547	Expansin-like B1
	Xyloglucan endotransglucosylase/hydrolases
	c58479_g2	13.9846	3.80577	Q8LF99	Probable xyloglucan endotransglucosylase/hydrolase protein 6
	c61739_g3	13.4397	3.74843	Q8L9A9	Probable xyloglucan endotransglucosylase/hydrolase protein 8
	c16186_g1	11.4449	3.51663	Q8LF99	Probable xyloglucan endotransglucosylase/hydrolase protein 6
	c57883_g1	11.1798	3.48283	Q9SJL9	Probable xyloglucan endotransglucosylase/hydrolase protein 32
	c58397_g4	7.93764	2.98871	Q8LDW9	Xyloglucan endotransglucosylase/hydrolase protein 9
	c119471_g1	7.85885	2.97432	Q9LJP4	Xyloglucan glycosyltransferase 4
	c58479_g3	7.5192	2.91058	Q8LF99	Probable xyloglucan endotransglucosylase/hydrolase protein 6
	c59992_g1	7.22166	2.85233	Q9SB75	Probable xyloglucan glycosyltransferase 5
	c137377_g1	6.24361	2.64238	Q8H038	Xyloglucan galactosyltransferase KATAMARI1 homolog
	c56135_g4	0.124617	-3.00443	Q38910	Probable xyloglucan endotransglucosylase/hydrolase protein 23
	c66142_g1	0.0870532	-3.52196	Q38908	Probable xyloglucan endotransglucosylase/hydrolase protein 30
	c55676_g1	0.0788261	-3.66518	Q38908	Probable xyloglucan endotransglucosylase/hydrolase protein 30
	c48301_g1	0.0788261	-3.66518	Q9SV60	Xyloglucan endotransglucosylase/hydrolase protein 2
	c33142_g1	0.0533566	-4.22819	Q38908	Probable xyloglucan endotransglucosylase/hydrolase protein 30
	c48378_g1	0.0385861	-4.69577	Q38908	Probable xyloglucan endotransglucosylase/hydrolase protein 30
	c58413_g4	0.118778	-3.07366	Q38910	Probable xyloglucan endotransglucosylase/hydrolase protein 23
	c58902_g2	0.0206638	-5.59675	Q9SVV2	Probable xyloglucan endotransglucosylase/hydrolase protein 26
	c33142_g2	0.00850336	-6.87775	Q38908	Probable xyloglucan endotransglucosylase/hydrolase protein 30
	Endoglucanases
	c36800_g1	12.0224	3.58765	P22503	Endoglucanase
	c55641_g3	11.6003	3.53609	O48766	Endoglucanase 11
	c26758_g2	7.49786	2.90648	Q8LQ92	Endoglucanase 3
	c12987_g1	6.90879	2.78843	Q8L7I0	Endoglucanase 19
	c33456_g1	0.124933	-3.00078	P05522	Endoglucanase 1
	c61550_g1	0.119711	-3.06238	P23548	Endoglucanase
	c46912_g1	0.0914103	-3.4515	P23548	Endoglucanase
	Polygalacturonases
	c51041_g1	44.3022	5.46931	Q949Z1	Polygalacturonase At1g48100
	c51041_g2	43.8492	5.45448	Q949Z1	Polygalacturonase At1g48100
	c23459_g1	23.0739	4.52819	Q949Z1	Polygalacturonase At1g48100
	c57004_g4	17.2308	4.10692	A7PZL3	Probable polygalacturonase
	c104664_g1	14.6338	3.87124	O23147	Polygalacturonase ADPG1
	c54125_g2	12.3823	3.6302	Q949Z1	Polygalacturonase At1g48100
	c120559_g1	11.9313	3.57668	Q05091	Polygalacturonase inhibitor
	c53900_g2	10.9741	3.45603	P92990	Probable polygalacturonase non-catalytic subunit JP650
	c57461_g1	10.4811	3.38972	Q949Z1	Polygalacturonase At1g48100
	c81688_g1	10.229	3.35459	P92982	Probable polygalacturonase non-catalytic subunit JP630
	c60884_g2	9.31155	3.21902	Q05091	Polygalacturonase inhibitor
	c122356_g1	9.13805	3.19189	O80760	Probable polygalacturonase non-catalytic subunit At1g60390
	c51101_g1	9.04904	3.17777	Q40161	Polygalacturonase-1 non-catalytic subunit beta
	c129955_g1	7.9118	2.98401	Q40161	Polygalacturonase-1 non-catalytic subunit beta
	c45649_g1	7.79519	2.96258	Q40161	Polygalacturonase-1 non-catalytic subunit beta
	c57004_g2	7.31802	2.87145	A7PZL3	Probable polygalacturonase
	c61054_g3	6.40748	2.67976	A7PZL3	Probable polygalacturonase
	c60450_g2	6.10347	2.60963	Q949Z1	Polygalacturonase At1g48100
	c37676_g1	0.101937	-3.29426	Q949Z1	Polygalacturonase At1g48100
	c94377_g1	0.0504345	-4.30945	Q949Z1	Polygalacturonase At1g48100
	c16313_g1	0.0349585	-4.83821	P35336	Polygalacturonase
	c56936_g4	0.0200749	-5.63846	Q9SFB7	Polygalacturonase QRT2
	c93518_g1	0.0193648	-5.69042	Q6H9K0	Exopolygalacturonase
	c120335_g1	0.0136691	-6.19294	P48979	Polygalacturonase
	c56936_g5	0.00963907	-6.69689	P35336	Polygalacturonase
	Beta-galactosidases
	c118548_g1	9.67961	3.27495	Q9SCV9	Beta-galactosidase 3
	c61607_g3	8.0657	3.0118	Q9MAJ7	Beta-galactosidase 5
	c111320_g1	7.57611	2.92146	Q9SCV9	Beta-galactosidase 3
	c110890_g1	7.1558	2.83911	Q5N8X6	Beta-galactosidase 3
	c57748_g1	6.97664	2.80253	Q5N8X6	Beta-galactosidase 3
	c61607_g7	6.52467	2.70591	Q9MAJ7	Beta-galactosidase 5
	c118548_g1	9.67961	3.27495	Q9SCV9	Beta-galactosidase 3
	c61607_g3	8.0657	3.0118	Q9MAJ7	Beta-galactosidase 5
	c111320_g1	7.57611	2.92146	Q9SCV9	Beta-galactosidase 3
	c110890_g1	7.1558	2.83911	Q5N8X6	Beta-galactosidase 3
	c57748_g1	6.97664	2.80253	Q5N8X6	Beta-galactosidase 3
	c61607_g7	6.52467	2.70591	Q9MAJ7	Beta-galactosidase 5
	c51121_g2	0.0737774	-3.76068	Q8GX69	Beta-galactosidase 16
	c63156_g8	0.067519	-3.88856	Q9SCW1	Beta-galactosidase 1
	c63156_g1	0.0565103	-4.14534	Q9SCW1	Beta-galactosidase 1
	c106469_g1	0.0562399	-4.15226	Q9SCW1	Beta-galactosidase 1
	c63156_g5	0.0494529	-4.3378	Q9SCW1	Beta-galactosidase 1
	c59734_g1	0.0306224	-5.02927	Q9SCW1	Beta-galactosidase 1
	c29580_g4	0.0231298	-5.4341	P48981	Beta-galactosidase
	c29580_g3	0.0210048	-5.57314	P48981	Beta-galactosidase
	Pectinesterases
	c125517_g1	26.198	4.71138	Q9FF77	Probable pectinesterase/pectinesterase inhibitor 47
	c64861_g1	23.1391	4.53226	Q8VYZ3	Probable pectinesterase 53
	c56559_g1	17.4252	4.1231	Q9LXD9	Probable pectinesterase/pectinesterase inhibitor 51
	c93506_g1	15.8393	3.98544	O23038	Probable pectinesterase 8
	c62139_g5	15.5422	3.95812	O81301	Probable pectinesterase/pectinesterase inhibitor 40
	c62139_g6	11.2189	3.48786	O81301	Probable pectinesterase/pectinesterase inhibitor 40
	c80538_g1	9.87182	3.30332	Q43143	Pectinesterase/pectinesterase inhibitor U1
	c122003_g1	6.89593	2.78575	Q8LPF3	Probable pectinesterase 68
	c56559_g2	6.55421	2.71242	Q9LXD9	Probable pectinesterase/pectinesterase inhibitor 51
	c125517_g1	26.198	4.71138	Q9FF77	Probable pectinesterase/pectinesterase inhibitor 47
	c64861_g1	23.1391	4.53226	Q8VYZ3	Probable pectinesterase 53
	c56559_g1	17.4252	4.1231	Q9LXD9	Probable pectinesterase/pectinesterase inhibitor 51
	c93506_g1	15.8393	3.98544	O23038	Probable pectinesterase 8 OS=Arabidopsis thaliana
	c62139_g5	15.5422	3.95812	O81301	Probable pectinesterase/pectinesterase inhibitor 40
	c62139_g6	11.2189	3.48786	O81301	Probable pectinesterase/pectinesterase inhibitor 40
	c80538_g1	9.87182	3.30332	Q43143	Pectinesterase/pectinesterase inhibitor U1
	c122003_g1	6.89593	2.78575	Q8LPF3	Probable pectinesterase 68
	c56559_g2	6.55421	2.71242	Q9LXD9	Probable pectinesterase/pectinesterase inhibitor 51
	c145339_g1	6.32034	2.66	O04886	Pectinesterase 1
	c50355_g3	0.0580357	-4.10692	Q9SRX4	Probable pectinesterase/pectinesterase inhibitor 7
	Pectin acetylesterases
	c50255_g1	12.8291	3.68135	Q66GM8	Pectin acetylesterase 10
	c50255_g1	12.8291	3.68135	Q66GM8	Pectin acetylesterase 10
	c3493_g1	0.0896738	-3.47917	Q6DBP4	Pectin acetylesterase 8
	c56862_g1	0.0566081	-4.14285	Q6DBP4	Pectin acetylesterase 8
	Pectate lyases
	c44183_g1	22.5364	4.49419	Q9M8Z8	Probable pectate lyase 8
	c44183_g2	17.3517	4.11701	Q9LJ42	Probable pectate lyase 10
	c44183_g3	12.6203	3.65767	Q93WF1	Probable pectate lyase 20
	c92195_g1	8.77047	3.13265	Q9SCP2	Probable pectate lyase 12
	c44183_g1	22.5364	4.49419	Q9M8Z8	Probable pectate lyase 8
	c44183_g2	17.3517	4.11701	Q9LJ42	Probable pectate lyase 10
	c44183_g3	12.6203	3.65767	Q93WF1	Probable pectate lyase 20
	c92195_g1	8.77047	3.13265	Q9SCP2	Probable pectate lyase 12
PAB vs PNAB
	Expansins
	c33318_g1	18.5819	4.21582	Q9M0I2	Expansin-B3
	c122353_g1	0.15243	-2.71378	Q850K7	Expansin-like B1
	c94968_g1	0.0982431	-3.3475	O48818	Expansin-A4
	c42610_g2	0.0903959	-3.4676	O48818	Expansin-A4
	c314_g1	0.0694491	-3.8479	Q9FL79	Expansin-A23
	Xyloglucan endotransglucosylase/hydrolases
	c38995_g1	0.0956242	-3.38648	Q8H038	Xyloglucan galactosyltransferase KATAMARI1 homolog
	c52116_g4	0.0786531	-3.66835	Q38857	Xyloglucan endotransglucosylase/hydrolase protein 22
	c120746_g1	0.0731776	-3.77245	P35694	Xyloglucan endotransglucosylase/hydrolase 2
	c95486_g1	0.108459	-3.20478	Q8LC45	Probable xyloglucan endotransglucosylase/hydrolase protein 33
	c57883_g2	18.141	4.18119	P93046	Probable xyloglucan endotransglucosylase/hydrolase protein 31
	Endoglucanases
	c55641_g3	17.9066	4.16242	O48766	Endoglucanase 11
	c78176_g1	14.4579	3.85379	Q42059	Endoglucanase 6
	c134581_g1	0.0480546	-4.37918	P22503	Endoglucanase
	Polygalacturonases
	c57716_g1	0.121966	-3.03545	Q9LE59	Polygalacturonate 4-alpha-galacturonosyltransferase
	c53401_g1	0.0961258	-3.37893	Q39766	Polygalacturonase
	c53401_g2	0.0782383	-3.67598	Q6H9K0	Exopolygalacturonase
	c121825_g1	0.0781289	-3.678	P35336	Polygalacturonase
	c134466_g1	0.0713784	-3.80837	P49062	Exopolygalacturonase
	c58267_g2	0.0689929	-3.85741	P49062	Exopolygalacturonase
	c51623_g2	0.0601849	-4.05445	Q40312	Polygalacturonase
	c58267_g1	0.0531655	-4.23337	P49062	Exopolygalacturonase
	c93518_g1	0.0265543	-5.23491	Q6H9K0	Exopolygalacturonase
	c51623_g3	0.0176501	-5.82418	Q40312	Polygalacturonase
	Beta-galactosidases
	c62819_g3	0.0750202	-3.73658	Q9SCU9	Beta-galactosidase 13
	c62819_g2	0.0325122	-4.94287	Q9SCU9	Beta-galactosidase 13
	Pectinesterases
	c58189_g1	35.4625	5.14822	Q9LXD9	Probable pectinesterase/pectinesterase inhibitor 51
	c83287_g1	11.2671	3.49405	Q43062	Pectinesterase/pectinesterase inhibitor PPE8B
	c64299_g1	8.02634	3.00474	P09607	Pectinesterase 2.1
	c25425_g2	0.108547	-3.20361	Q9FJ21	Probable pectinesterase/pectinesterase inhibitor 58
	c60520_g2	0.10376	-3.26867	Q7Y201	Probable pectinesterase/pectinesterase inhibitor 13
	c59880_g5	0.10016	-3.31962	Q9LSP1	Probable pectinesterase 67
	c39000_g1	0.09562	-3.38654	Q8GX86	Probable pectinesterase/pectinesterase inhibitor 21
	c42022_g1	0.0948845	-3.39768	P83326	Pectinesterase inhibitor
	c61068_g2	0.0926052	-3.43276	Q42920	Pectinesterase/pectinesterase inhibitor
	c60520_g6	0.0889472	-3.49091	Q7Y201	Probable pectinesterase/pectinesterase inhibitor 13
	c43318_g2	0.0889472	-3.49091	Q9SMY6	Putative pectinesterase/pectinesterase inhibitor 45
	c63902_g1	0.0849522	-3.55721	O49006	Pectinesterase/pectinesterase inhibitor 3
	c61160_g9	0.0823105	-3.60278	Q3E8Z8	Putative pectinesterase/pectinesterase inhibitor 28
	c55594_g1	0.0811154	-3.62388	O04953	Putative pectinesterase 52
	c29808_g1	0.0801804	-3.64061	Q42920	Pectinesterase/pectinesterase inhibitor
	c61068_g3	0.0801435	-3.64127	Q3E8Z8	Putative pectinesterase/pectinesterase inhibitor 28
	c55042_g3	0.0770366	-3.69831	Q9FJ21	Probable pectinesterase/pectinesterase inhibitor 58
	c43318_g1	0.0769413	-3.7001	Q7Y201	Probable pectinesterase/pectinesterase inhibitor 13
	c55969_g2	0.0752998	-3.73121	Q3E8Z8	Putative pectinesterase/pectinesterase inhibitor 28
	c106313_g1	0.0752137	-3.73286	Q7Y201	Probable pectinesterase/pectinesterase inhibitor 13
	c93911_g1	0.0747015	-3.74272	Q84WM7	Pectinesterase PPME1
	c55042_g2	0.0743918	-3.74871	Q8GX86	Probable pectinesterase/pectinesterase inhibitor 21
	c61068_g5	0.0743244	-3.75002	Q42920	Pectinesterase/pectinesterase inhibitor
	c61068_g7	0.0727232	-3.78144	Q42920	Pectinesterase/pectinesterase inhibitor
	c60520_g5	0.0719974	-3.79591	Q9SMY6	Putative pectinesterase/pectinesterase inhibitor 45
	c55969_g1	0.0714249	-3.80743	Q9FJ21	Probable pectinesterase/pectinesterase inhibitor 58
	c55042_g1	0.071154	-3.81291	Q3E8Z8	Putative pectinesterase/pectinesterase inhibitor 28
	c61068_g8	0.0711191	-3.81362	Q42920	Pectinesterase/pectinesterase inhibitor
	c61068_g6	0.0701168	-3.8341	O04887	Pectinesterase 2
	c61160_g10	0.0694101	-3.84871	Q7Y201	Probable pectinesterase/pectinesterase inhibitor 13
	c61160_g14	0.0675405	-3.8881	P41510	Probable pectinesterase/pectinesterase inhibitor
	c53081_g1	0.0662733	-3.91543	Q3E8Z8	Putative pectinesterase/pectinesterase inhibitor 28
	c134402_g1	0.0661928	-3.91718	Q7Y201	Probable pectinesterase/pectinesterase inhibitor 13
	c63950_g1	0.0609531	-4.03616	P83326	Pectinesterase inhibitor
	c61068_g4	0.0595774	-4.06909	Q42920	Pectinesterase/pectinesterase inhibitor
	c92377_g1	0.0552858	-4.17695	P83326	Pectinesterase inhibitor
	c55042_g4	0.0485935	-4.36309	Q8GX86	Probable pectinesterase/pectinesterase inhibitor 21
	c135690_g1	0.0456751	-4.45245	Q43867	Pectinesterase 1
	c107322_g1	0.0449361	-4.47598	O80722	Pectinesterase 4
	c60520_g3	0.0389998	-4.68039	Q7Y201	Probable pectinesterase/pectinesterase inhibitor 13
	c17007_g1	0.0152895	-6.03131	O04887	Pectinesterase 2
	Pectin acetylesterases
	c102004_g1	0.0948845	-3.39768	Q6DBP4	Pectin acetylesterase 8
	c56862_g1	0.0408472	-4.61362	Q6DBP4	Pectin acetylesterase 8
	Pectate lyases
	c50474_g1	0.109003	-3.19756	P15722	Probable pectate lyase P59
	c37060_g1	0.0953532	-3.39058	Q9LFP5	Probable pectate lyase 19
	c61980_g4	0.0798619	-3.64635	P40973	Pectate lyase
	c46442_g1	0.0760339	-3.71721	P15722	Probable pectate lyase P59
	c61980_g2	0.0748312	-3.74022	P40973	Pectate lyase
	c140440_g1	0.0693739	-3.84946	Q9LFP5	Probable pectate lyase 19
	c58381_g1	0.0641701	-3.96195	P40973	Pectate lyase
	c58381_g2	0.0635205	-3.97663	P15722	Probable pectate lyase P59

## Sheet: Table S5
Table S5. Differential expression patterns of plant hormone signaling-related genes in comparison of libraries FAB vs FNAB.
Hormone	Unigene ID	FC	log2FC	Regulation	UniProt Acc. No	Gene description	Function
IAA
	c45820_g1	0.0429755	-4.54034	down	P33080	Auxin-induced protein X10A	Signal transduction
	c80977_g1	0.0611758	-4.0309	down	P33080	Auxin-induced protein X10A	Signal transduction
	c60447_g4	20.3738	4.34864	up	Q9ZSY8.1	Auxin-responsive protein IAA27	Signal transduction
	c58657_g3	32.2961	5.01329	up	P33083	Auxin-induced protein 6B	Signal transduction
	c1456_g1	21.9454	4.45585	up	P13089	Auxin-induced protein AUX28	Signal transduction
	c53110_g1	20.1155	4.33024	up	Q9FKM7	Auxin-responsive protein IAA33	Signal transduction
	c61288_g4	0.0208418	-5.58438	down	P93022	Auxin response factor 7 (ARF7)	Signal transduction
	c62886_g4	17.015	4.08874	up	Q9ZTX9	Auxin response factor 4 (ARF4)	Signal transduction
	c39845_g1	18.1383	4.18097	up	Q9FIQ5	Protein TORNADO 2 (TRN2)	Transport
	c134360_g1	16.8829	4.07749	up	Q7XKU5	2-oxoglutarate-dependent dioxygenase DAO	Catabolism
	c61021_g1	14.3708	3.84506	up	Q9SVU0	Probable indole-3-pyruvate monooxygenase YUCCA8 (YUC8)	Biosynthesis.
ET
	c58341_g3	14.2271	3.83057	up	Q9LUA2	Ethylene-responsive transcription factor ERF119	Signal transduction
	c65488_g1	13.803	3.78691	up	Q9FJV0	Mitogen-activated protein kinase 6 (MPK6)	Signal transduction
	c19754_g1	0.0474234	-4.39826	down	Q40478	Ethylene-responsive transcription factor 5 (ERF5)	Signal transduction
JA
	c52719_g1	0.0392859	-4.66984	down	Q9LMA8	Protein TIFY 10A	Signal transduction
	c92415_g1	16.3878	4.03455	up	Q9CAG3	Lipoxygenase 6, chloroplastic (LOX6)	Biosynthesis.
	c121732_g1	105.379	6.71944	up	Q9SBK6	Jasmonate O-methyltransferase (JMT)	Biosynthesis.
ABA
	c35977_g3	0.0531511	-4.23376	down	O80992	Abscisic acid receptor PYL2	Signal transduction
	c35977_g2	0.0183679	-5.76667	down	O80992	Abscisic acid receptor PYL2	Signal transduction
GA
	c49118_g1	18.2928	4.1932	up	Q7Y1B6	DELLA protein GAI	Signal transduction
	c59846_g1	138.17	7.1103	up	Q6GKX7	Gibberellin-regulated protein 12 (GASA12)	Signal transduction
	c48197_g2	15.4503	3.94956	up	Q9LFR3	Gibberellin-regulated protein 14 (GASA14)	Signal transduction
	c78744_g1	112.646	6.81565	up	Q9C5Y2	Ent-kaurenoic acid oxidase 2 (KAO2)	Biosynthesis.
	c54588_g2	66.5727	6.05686	up	Q39111	Gibberellin 20 oxidase 2 (GA20OX2)	Biosynthesis.
	c54588_g1	15.1639	3.92257	up	Q39110	Gibberellin 20 oxidase 1 (GA20OX1)	Biosynthesis.
	c57884_g1	0.0207593	-5.5901	down	Q9SQ80	Gibberellin 2-beta-dioxygenase 1 (GA2OX1)	Catabolism
	c25173_g1	0.019368	-5.69018	down	Q9SQ80	Gibberellin 2-beta-dioxygenase 1 (GA2OX1)	Catabolism
BR
	c52175_g1	29.5028	4.88278	up	Q9SN11	Cyclin-D3-3 (CYCD3-3)	Signal transduction
	c55975_g1	35.2832	5.14091	up	Q9FGQ7	Cyclin-D3-2 (CYCD3-2)	Signal transduction
CK
	c59901_g1	21.1974	4.40581	up	Q9FF18	Cytokinin hydroxylase (CYP735A1)	Catabolism
SA
	c16844_g1	57.4119	5.84328	up	Q40374	Pathogenesis-related protein PR-1	Signal transduction
SL
	c47746_g1	17.0052	4.0879	up	J9U5U9	Probable strigolactone esterase DAD2	Signal transduction

## Sheet: Table S6
Table S6. Differential expression patterns of plant hormone signaling-related genes in comparison of libraries FPAB vs FPNAB.
Hormone	Unigene ID	FC	log2FC	Regulation	UniProt Acc. No	Gene description	Function
IAA
	c134360_g1	10.9152	3.44827	up	Q7XKU5	2-oxoglutarate-dependent dioxygenase DAO (DAO)	Catabolism
	c33445_g1	10.6821	3.41713	up	Q9FLN8	Indole-3-acetate O-methyltransferase 1 (IAMT1)	Catabolism
	c60208_g5	6.28434	2.65176	up	P32293	Auxin-induced protein 22A (AUX22A)	Signal transduction
	c98172_g1	0.101195	-3.30479	down	P33082	Auxin-induced protein X15	Signal transduction
	c49073_g1	9.27642	3.21357	up	Q8H174	Auxin-responsive protein IAA31	Signal transduction
	c94489_g1	0.0559047	-4.16089	down	P33082	Auxin-induced protein X15	Signal transduction
	c60447_g4	11.6832	3.54636	up	Q9ZSY8.1	Auxin-responsive protein IAA27	Signal transduction
	c9472_g2	8.9743	3.1658	up	P13089	Auxin-induced protein AUX28	Signal transduction
	c32914_g1	5.79196	2.53405	up	P93830	Auxin-responsive protein IAA17	Signal transduction
	c80977_g1	0.0389598	-4.68187	down	P33080	Auxin-induced protein X10A	Signal transduction
	c51824_g4	16.9443	4.08273	up	O24543	Auxin-induced protein 22E (AUX22E)	Signal transduction
	c32123_g1	13.2034	3.72283	up	P32293	Auxin-induced protein 22A (AUX22A)	Signal transduction
	c45820_g1	0.0275284	-5.18294	down	P33080	Auxin-induced protein X10A	Signal transduction
	c52459_g1	7.76466	2.95692	up	P32294	Auxin-induced protein 22B (AUX22B)	Signal transduction
	c50003_g2	6.24707	2.64318	up	P32295	Indole-3-acetic acid-induced protein ARG7	Signal transduction
	c56497_g1	0.0165659	-5.91564	down	P32295	Indole-3-acetic acid-induced protein ARG7	Signal transduction
	c60447_g5	12.205	3.6094	up	Q9ZSY8	Auxin-responsive protein IAA27	Signal transduction
	c60447_g2	9.81079	3.29437	up	Q9ZSY8	Auxin-responsive protein IAA27	Signal transduction
	c55518_g4	6.45057	2.68943	up	P32295	Indole-3-acetic acid-induced protein ARG7	Signal transduction
	c50920_g1	6.67453	2.73867	up	P93830	Auxin-responsive protein IAA17	Signal transduction
	c135946_g1	12.8635	3.68521	up	P33079	Auxin-induced protein 10A5	Signal transduction
	c51824_g1	13.7879	3.78533	up	O24542	Auxin-induced protein 22D (AUX22D)	Signal transduction
	c15169_g1	8.21323	3.03795	up	O24407	Auxin-responsive protein IAA16	Signal transduction
	c1456_g1	6.52855	2.70676	up	P13089	Auxin-induced protein AUX28	Signal transduction
	c50790_g2	6.1321	2.61638	up	O24541	Auxin-induced protein 22C (AUX22C)	Signal transduction
	c52961_g2	0.15834	-2.6589	down	Q05349	Auxin-repressed 12.5 kDa protein	Signal transduction
	c60751_g7	0.0958052	-3.38375	down	Q05349	Auxin-repressed 12.5 kDa protein	Signal transduction
	c61017_g1	0.109282	-3.19388	down	Q05349	Auxin-repressed 12.5 kDa protein	Signal transduction
	c59673_g5	0.108874	-3.19927	down	P32292	Indole-3-acetic acid-induced protein ARG2	Signal transduction
	c50929_g1	0.088465	-3.49875	down	Q05349	Auxin-repressed 12.5 kDa protein	Signal transduction
	c128482_g1	0.15679	-2.67309	down	P93022	Auxin response factor 7 (ARF7)	Signal transduction
	c30002_g1	0.156421	-2.67649	down	P93022	Auxin response factor 7 (ARF7)	Signal transduction
	c62886_g2	0.15277	-2.71057	down	Q9ZTX9	Auxin response factor 4 (ARF4)	Signal transduction
	c62886_g4	8.65533	3.11359	up	Q9ZTX9	Auxin response factor 4 (ARF4)	Signal transduction
	c60211_g6	0.14345	-2.80138	down	Q8RYC8	Auxin response factor 19 (ARF19)	Signal transduction
	c54931_g4	0.10568	-3.24223	down	Q9LPL4	F-box protein SKP2A	Signal transduction
	c58059_g1	12.9338	3.69308	up	Q9ZRA4	Auxin-binding protein ABP19a	Signal transduction
	c110842_g1	8.40034	3.07045	up	Q9ZRA4	Auxin-binding protein ABP19a	Signal transduction
	c52095_g1	7.53127	2.91289	up	Q9ZRA4	Auxin-binding protein ABP19a	Signal transduction
	c110176_g1	0.0597148	-4.06577	down	Q9SRU2	Auxin transport protein BIG	Transport
	c61059_g4	11.2121	3.48698	up	Q8L883	Auxin transporter-like protein 5 (LAX5)	Transport
	c61634_g11	9.1741	3.19757	up	Q8L884	Auxin transporter-like protein 4 (LAX4)	Transport
	c11165_g1	12.4023	3.63254	up	Q8L884	Auxin transporter-like protein 4 (LAX4)	Transport
	c38813_g1	8.01928	3.00347	up	O64682	Protein kinase PINOID (PID)	Transport
ET
	c50570_g2	0.0752181	-3.73278	down	O23116	ETHYLENE INSENSITIVE 3-like 3 (EIL3)	Signal transduction
	c35372_g1	24.2406	4.59935	up	Q39127	Ethylene-responsive transcription factor TINY	Signal transduction
	c18833_g1	17.2985	4.11258	up	O80339	Ethylene-responsive transcription factor 3 (ERF3)	Signal transduction
	c57280_g3	16.0303	4.00273	up	Q9XI33	Ethylene-responsive transcription factor WIN1	Signal transduction
	c36446_g1	14.4312	3.85112	up	Q9SUQ2	Ethylene-responsive transcription factor CRF2	Signal transduction
	c56321_g1	13.1776	3.72001	up	Q8LBQ7	Ethylene-responsive transcription factor ERF034	Signal transduction
	c58056_g1	10.5663	3.4014	up	Q94AW5	Ethylene-responsive transcription factor ERF003	Signal transduction
	c58236_g3	7.39394	2.88634	up	Q3E958	Ethylene-responsive transcription factor SHINE 3 (SHN3)	Signal transduction
	c143371_g1	7.0856	2.82489	up	Q9LU18	Ethylene-responsive transcription factor ERF036	Signal transduction
	c140755_g1	0.164679	-2.60227	down	Q1ECI2	Ethylene-responsive transcription factor ERF023	Signal transduction
	c63327_g16	0.163598	-2.61177	down	Q9LM15	Ethylene-responsive transcription factor RAP2-13	Signal transduction
	c49847_g2	0.153767	-2.70118	down	Q40478	Ethylene-responsive transcription factor 5 (ERF5)	Signal transduction
	c59291_g2	0.123639	-3.0158	down	Q9SKT1	Ethylene-responsive transcription factor ERF053	Signal transduction
	c36701_g2	0.0957143	-3.38512	down	Q9LY29	Ethylene-responsive transcription factor ERF115	Signal transduction
	c60801_g4	0.0657374	-3.92714	down	Q84MB3	1-aminocyclopropane-1-carboxylate oxidase homolog 1	Biosynthesis.
	c140425_g1	0.0545625	-4.19595	down	Q9MB94	1-aminocyclopropane-1-carboxylate oxidase (ACO1)	Biosynthesis.
	c60409_g3	0.156496	-2.6758	down	Q84MB3	1-aminocyclopropane-1-carboxylate oxidase homolog 1	Biosynthesis.
JA
	c45959_g2	0.0113133	-6.46584	down	Q9LUW0	Linoleate 9S-lipoxygenase 5, chloroplastic (LOX5)	Biosynthesis.
	c57820_g1	0.0831716	-3.58777	down	Q9LUW0	Linoleate 9S-lipoxygenase 5, chloroplastic (LOX5)	Biosynthesis.
	c92570_g1	0.0512793	-4.28548	down	Q96242	Allene oxide synthase, chloroplastic (CYP74A)	Biosynthesis.
ABA
	c59873_g1	0.0652833	-3.93714	down	P49598	Protein phosphatase 2C 37 (PP2CA)	Signal transduction
	c92471_g1	0.0817358	-3.61289	down	P49598	Protein phosphatase 2C 37 (PP2CA)	Signal transduction
	c59873_g1	0.0652833	-3.93714	down	P49598	Protein phosphatase 2C 37 (PP2CA)	Signal transduction
	c92471_g1	0.0817358	-3.61289	down	P49598	Protein phosphatase 2C 37 (PP2CA)	Signal transduction
	c4676_g1	0.13997	-2.83681	down	A2YNT8	Serine/threonine-protein kinase SAPK2	Signal transduction
	c55781_g2	0.0740267	-3.75581	down	Q7Y0B9	Serine/threonine-protein kinase SAPK8	Signal transduction
	c68316_g1	0.0914739	-3.4505	down	Q8VZS8	Abscisic acid receptor PYL1	Signal transduction
	c59913_g1	0.0370092	-4.75597	down	Q8VZS8	Abscisic acid receptor PYL1	Signal transduction
	c61127_g1	10.503	3.39273	up	Q9LJK2	Abscisic acid 8'-hydroxylase 4 (CYP707A4)	Catabolism
GA
	c55751_g4	0.0781164	-3.67823	down	O80536	Transcription factor PIF3	Signal transduction
	c57024_g5	14.7951	3.88704	up	P46690	Gibberellin-regulated protein 4 (GASA4)	Signal transduction
	c121024_g1	8.28715	3.05088	up	Q9LFR3	Gibberellin-regulated protein 14 (GASA14)	Signal transduction
	c48197_g2	8.27671	3.04906	up	Q9LFR3	Gibberellin-regulated protein 14 (GASA14)	Signal transduction
	c125497_g1	9.34327	3.22393	up	Q6NMQ7	Gibberellin-regulated protein 6 (GASA6)	Signal transduction
	c54588_g2	9.50369	3.24849	up	Q39111	Gibberellin 20 oxidase 2 (GA20OX2)	Biosynthesis.
	c54588_g1	12.6695	3.66329	up	Q39110	Gibberellin 20 oxidase 1 (GA20OX1)	Biosynthesis.
	c24709_g1	0.00960355	-6.70222	down	O24648	Gibberellin 3-beta-dioxygenase 1 (LE)	Biosynthesis.
	c60896_g9	7.42174	2.89176	up	Q9C5Y2	Ent-kaurenoic acid oxidase 2 (KAO2)	Biosynthesis.
	c25173_g1	0.020856	-5.58339	down	Q9SQ80	Gibberellin 2-beta-dioxygenase 1 (GA2OX1)	Catabolism
	c57884_g1	0.00795805	-6.97337	down	Q9SQ80	Gibberellin 2-beta-dioxygenase 1 (GA2OX1)	Catabolism
	c49763_g3	0.08061	-3.6329	down	Q9SQ80	Gibberellin 2-beta-dioxygenase 1 (GA2OX1)	Catabolism
	c49763_g1	0.169388	-2.5616	down	Q9SQ80	Gibberellin 2-beta-dioxygenase 1 (GA2OX1)	Catabolism
BR
	c54957_g3	15.977	3.99793	up	Q69F95	Cytochrome P450 85A (BA13)	Biosynthesis.
	c54957_g2	19.3017	4.27066	up	Q69F95	Cytochrome P450 85A (BA13)	Biosynthesis.
	c56562_g2	10.4478	3.38512	up	P42753	Cyclin-D3-1 (CYCD3-1)	Signal transduction
	c56562_g1	13.3245	3.73601	up	P42753	Cyclin-D3-1 (CYCD3-1)	Signal transduction
	c55975_g1	8.90652	3.15486	up	Q9FGQ7	Cyclin-D3-2 (CYCD3-2)	Signal transduction
	c51134_g1	9.91701	3.3099	up	Q94IA6	3-epi-6-deoxocathasterone 23-monooxygenase (CYP90D1)	Biosynthesis.
	c57767_g3	0.106602	-3.2297	down	Q43147	Cytochrome P450 85A1 (CYP85A1)	Biosynthesis.
	c54957_g1	0.0338263	-4.88571	down	Q69F95	Cytochrome P450 85A (BA13)	Biosynthesis.
CK
	c49543_g4	5.92101	2.56584	up	Q9C5U0	Histidine kinase 4 (AHK4)	Signal transduction
	c62634_g1	16.0479	4.00432	up	Q67YU0	Cytokinin dehydrogenase 5 (CKX5)	Catabolism
	c55747_g3	14.4766	3.85565	up	Q9LTS3	Cytokinin dehydrogenase 3 (CKX3)	Catabolism
	c55747_g1	13.4664	3.75129	up	Q9LTS3	Cytokinin dehydrogenase 3 (CKX3)	Catabolism
	c50912_g1	0.115048	-3.11969	down	O22213	Cytokinin dehydrogenase 1 (CKX1)	Catabolism
	c50912_g4	0.0880919	-3.50485	down	O22213	Cytokinin dehydrogenase 1 (CKX1)	Catabolism
	c108053_g1	0.0564645	-4.14651	down	Q75K78	Cytokinin dehydrogenase 9 (CKX9)	Catabolism
	c62014_g7	11.3984	3.51075	up	Q8RUN2	Cytokinin riboside 5'-monophosphate phosphoribohydrolase LOG1	Biosynthesis.
	c44862_g1	5.88992	2.55825	up	Q8L8B8	Cytokinin riboside 5'-monophosphate phosphoribohydrolase LOG3	Biosynthesis.
SA
	c8716_g1	0.0549212	-4.18649	down	Q39237	Transcription factor TGA1	Signal transduction
	c53737_g2	0.14583	-2.77764	down	Q39237	Transcription factor TGA1	Signal transduction
	c93153_g1	0.045547	-4.4565	down	Q6RYA0	Salicylic acid-binding protein 2 (SABP2)	Signal transduction
	c16844_g1	17.3929	4.12043	up	Q40374	Pathogenesis-related protein PR-1	Signal transduction
	c33973_g2	0.072935	-3.77725	down	Q9ZNS4	Pathogenesis-related protein 1 (PRB1)	Signal transduction

## Sheet: Table S7
Table S7. Differential expression patterns of plant hormone signaling-related genes in comparison of libraries PAB vs PNAB.
Hormone	Unigene ID	FC	log2FC	Regulation	UniProt Acc. No	Gene description	Function
IAA
	c51910_g3	0.0679929	-3.87847	down	B7F8P5	Auxin-responsive protein SAUR36	Signal transduction
	c47882_g2	13.1801	3.72029	up	P33083	Auxin-induced protein 6B	Signal transduction
	c43006_g1	0.0654431	-3.93362	down	P33082	Auxin-induced protein X15	Signal transduction
	c68269_g1	0.103113	-3.2777	down	P32295	Indole-3-acetic acid-induced protein ARG7	Signal transduction
	c52420_g3	107.891	6.75343	up	Q94JM3	Auxin response factor 2 (ARF2)	Signal transduction
	c52420_g4	63.1467	5.98064	up	Q94JM3	Auxin response factor 2 (ARF2)	Signal transduction
	c52420_g1	15.0088	3.90774	up	Q94JM3	Auxin response factor 2 (ARF2)	Signal transduction
	c62886_g7	7.52011	2.91075	up	Q9ZTX9	Auxin response factor 4 (ARF4)	Signal transduction
	c62886_g2	6.82992	2.77187	up	Q9ZTX9	Auxin response factor 4 (ARF4)	Signal transduction
	c85345_g1	0.0831693	-3.5878	down	Q570C0	Protein TRANSPORT INHIBITOR RESPONSE 1 (TIR1)	Signal transduction
	c52095_g1	0.0330798	-4.91791	down	Q9ZRA4	Auxin-binding protein ABP19a (ABP19A)	Signal transduction
	c58059_g1	0.0740347	-3.75565	down	Q9ZRA4	Auxin-binding protein ABP19a (ABP19A)	Signal transduction
	c54931_g4	0.0534022	-4.22696	down	Q9LPL4	F-box protein SKP2A (SKP2A)	Signal transduction
	c28519_g1	11.3162	3.50031	up	P54970	IAA-amino acid hydrolase ILR1-like 2 (ILL2)	Catabolism
ET
	c60313_g3	0.153113	-2.70733	down	Q9MB95	1-aminocyclopropane-1-carboxylate synthase 1 (ACS1)	Biosynthesis.
	c58986_g1	0.151339	-2.72415	down	P31531	1-aminocyclopropane-1-carboxylate synthase (ACS1)	Biosynthesis.
	c107301_g1	0.0858036	-3.54282	down	Q9STR4	1-aminocyclopropane-1-carboxylate synthase 7 (ACS7)	Biosynthesis.
	c18833_g1	0.141683	-2.81926	down	O80339	Ethylene-responsive transcription factor 3 (ERF3)	Signal transduction
	c81001_g1	0.136085	-2.87741	down	O80337	Ethylene-responsive transcription factor 1A (ERF1A)	Signal transduction
JA
	c96574_g1	38.1634	5.25412	up	O49687	Transcription factor MYC4	Signal transduction
	c52719_g1	0.0937119	-3.41562	down	Q9LMA8	Protein TIFY 10A	Signal transduction
	c43486_g2	6.32967	2.66213	up	Q9AR07	Jasmonate O-methyltransferase (JMT)	Biosynthesis.
	c61214_g3	20.3784	4.34897	up	P38417	Linoleate 9S-lipoxygenase-4 (LOX4)	Biosynthesis.
	c92206_g1	10.5699	3.40189	up	P27480	Linoleate 9S-lipoxygenase 1 (LOX1)	Biosynthesis.
	c70262_g1	7.7285	2.95019	up	P27480	Linoleate 9S-lipoxygenase 1 (LOX1)	Biosynthesis.
ABA
	c61117_g1	28.0535	4.81011	up	Q01593	B3 domain-containing transcription factor ABI3	Signal transduction
	c40794_g1	11.3733	3.50758	up	Q949P1	Abscisic acid 8'-hydroxylase 1 (CYP707A1)	Catabolism
GA
	c59646_g2	7551.39	12.8825	up	Q39111	Gibberellin 20 oxidase 2 (GA20OX2)	Biosynthesis.
	c60896_g9	446.487	8.80247	up	Q9C5Y2	Ent-kaurenoic acid oxidase 2 (KAO2)	Biosynthesis.
	c35897_g2	154.302	7.26961	up	Q39111	Gibberellin 20 oxidase 2 (GA20OX2)	Biosynthesis.
	c56081_g1	128.772	7.00867	up	Q39548	Ent-kaur-16-ene synthase, chloroplastic	Biosynthesis.
	c107232_g1	124.284	6.9575	up	Q93ZB2	Ent-kaurene oxidase, chloroplastic (KO)	Biosynthesis.
	c48035_g1	112.438	6.81299	up	O04408	Ent-copalyl diphosphate synthase	Biosynthesis.
	c39931_g1	108.387	6.76005	up	Q9C5Y2	Ent-kaurenoic acid oxidase 2 (KAO2)	Biosynthesis.
	c28982_g1	18.6125	4.2182	up	O04408	Ent-copalyl diphosphate synthase	Biosynthesis.
	c12118_g2	11.9964	3.58453	up	O24648	Gibberellin 3-beta-dioxygenase 1 (LE)	Biosynthesis.
	c49763_g2	9.99506	3.32121	up	Q9SQ80	Gibberellin 2-beta-dioxygenase 1 (GA2OX1)	Catabolism
	c40131_g1	0.118266	-3.07989	down	Q0JIC2	Transcription factor GAMYB	Signal transduction
	c60985_g11	0.0540823	-4.2087	down	Q0JIC2	Transcription factor GAMYB	Signal transduction
SA
	c33973_g2	10.0641	3.33115	up	Q9ZNS4	Pathogenesis-related protein 1	Signal transduction
	c55789_g1	0.054758	-4.19079	down	P11670	Basic form of pathogenesis-related protein 1	Signal transduction
	c55789_g2	0.06544	-3.93368	down	P11670	Basic form of pathogenesis-related protein 1	Signal transduction
	c65186_g1	0.0759662	-3.7185	down	Q40374	Pathogenesis-related protein PR-1	Signal transduction
	c63991_g1	0.0627448	-3.99436	down	Q40374	Pathogenesis-related protein PR-1	Signal transduction
	c38394_g1	0.0444678	-4.4911	down	Q40374	Pathogenesis-related protein PR-1	Signal transduction
SL
	c54938_g1	8.89258	3.1526	up	J9U5U9	Probable strigolactone esterase DAD2	Signal transduction

## Sheet: Table S8
Table S8. List and annotation of differentially expressed genes (DEGs) between FAB and FNAB with PPDE < 0.05.
	Unigene ID	FC	log2FC	UniProt Acc. No	Gene description
	c120629_g1	1606.66	10.6498	P13917	Basic 7S globulin OS=Glycine max GN=BG PE=1 SV=2
	c60695_g2	797.298	9.63898	O48651	Squalene monooxygenase OS=Panax ginseng PE=2 SV=1
	c55868_g3	743.734	9.53864
	c120536_g1	713.596	9.47896	Q9SCU0	Short-chain dehydrogenase reductase 2a OS=Arabidopsis thaliana GN=SDR2a PE=3 SV=1
	c42880_g1	602.529	9.23489	P10978	Retrovirus-related Pol polyprotein from transposon TNT 1-94 OS=Nicotiana tabacum PE=2 SV=1
	c63206_g1	472.041	8.88277	P0CV94	(3S,6E)-nerolidol synthase 1 OS=Fragaria ananassa PE=1 SV=1
	c52806_g3	453.525	8.82504	Q9M0X9	4-coumarate--CoA ligase-like 7 OS=Arabidopsis thaliana GN=4CLL7 PE=1 SV=1
	c31436_g1	444.608	8.79639	Q39048	Protein ECERIFERUM 1 OS=Arabidopsis thaliana GN=CER2 PE=1 SV=1
	c47283_g1	414.291	8.6945	P0CV94	(3S,6E)-nerolidol synthase 1 OS=Fragaria ananassa PE=1 SV=1
	c41239_g1	379.85	8.56929	F4I9E1	Protein NUCLEAR FUSION DEFECTIVE 4 OS=Arabidopsis thaliana GN=NFD4 PE=3 SV=1
	c7946_g1	370.974	8.53517
	c32100_g1	302.842	8.24242	Q9SI09	Probable E3 ubiquitin-protein ligase XERICO OS=Arabidopsis thaliana GN=XERICO PE=1 SV=1
	c64119_g1	263.83	8.04346	O65709	Long-chain-alcohol oxidase FAO4A OS=Arabidopsis thaliana GN=FAO4A PE=3 SV=2
	c53584_g1	255.022	7.99448	P49351	Farnesyl pyrophosphate synthase 1 OS=Lupinus albus GN=FPS1 PE=2 SV=1
	c61264_g4	224.902	7.81315	Q9C942	Caffeoylshikimate esterase OS=Arabidopsis thaliana GN=CSE PE=1 SV=1
	c111535_g1	213.81	7.74018
	c36876_g1	196.852	7.62097	O65709	Long-chain-alcohol oxidase FAO4A OS=Arabidopsis thaliana GN=FAO4A PE=3 SV=2
	c54419_g2	177.437	7.47116	B9SCB6	Probable terpene synthase 2 OS=Ricinus communis GN=TPS2 PE=3 SV=1
	c70731_g1	173.714	7.44057	Q39048	Protein ECERIFERUM 1 OS=Arabidopsis thaliana GN=CER2 PE=1 SV=1
	c63516_g4	165.485	7.37056
	c43394_g1	162.618	7.34534	P29057	3-hydroxy-3-methylglutaryl-coenzyme A reductase 1 OS=Hevea brasiliensis GN=HMGR1 PE=2 SV=1
	c54441_g2	153.755	7.26449	O22126	Fasciclin-like arabinogalactan protein 8 OS=Arabidopsis thaliana GN=FLA8 PE=1 SV=1
	c121480_g1	148.612	7.21541	Q43017	Non-specific lipid-transfer protein 1 OS=Prunus dulcis PE=3 SV=1
	c43394_g2	148.265	7.21203	Q41438	3-hydroxy-3-methylglutaryl-coenzyme A reductase 3 OS=Solanum tuberosum GN=HMG3 PE=2 SV=1
	c79824_g1	139.597	7.12512	Q6NMR8	Protein FANTASTIC FOUR 3 OS=Arabidopsis thaliana GN=FAF3 PE=2 SV=1
	c59846_g1	138.17	7.1103	Q6GKX7	Gibberellin-regulated protein 12 OS=Arabidopsis thaliana GN=GASA12 PE=3 SV=1
	c93759_g1	136.69	7.09476	Q43077	Primary amine oxidase OS=Pisum sativum PE=1 SV=1
	c59898_g2	136.388	7.09158
	c54257_g1	133.463	7.0603	V7C456	Protein DETOXIFICATION OS=Phaseolus vulgaris GN=PHAVU_004G175400g PE=3 SV=1
	c25424_g1	120.949	6.91826	Q9FNV8	Transcription factor MYB114 OS=Arabidopsis thaliana GN=MYB114 PE=1 SV=1
	c92561_g1	116.793	6.86781
	c35677_g2	116.634	6.86584
	c63235_g2	113.23	6.82311	A0A151RE46	Retrovirus-related Pol polyprotein from transposon TNT 1-94 OS=Cajanus cajan GN=KK1_037831 PE=4 SV=1
	c78744_g1	112.646	6.81565	Q9C5Y2	Ent-kaurenoic acid oxidase 2 OS=Arabidopsis thaliana GN=KAO2 PE=2 SV=2
	c59666_g1	110.854	6.79252	P81391	Myb-related protein 305 OS=Antirrhinum majus GN=MYB305 PE=2 SV=1
	c120449_g1	106.594	6.73598	Q39224	Protein SRG1 OS=Arabidopsis thaliana GN=SRG1 PE=2 SV=1
	c121732_g1	105.379	6.71944	Q9SBK6	Jasmonate O-methyltransferase OS=Brassica rapa subsp. pekinensis GN=JMT PE=1 SV=1
	c56904_g2	104.575	6.7084	Q8GT20	Benzyl alcohol O-benzoyltransferase OS=Nicotiana tabacum GN=HSR201 PE=1 SV=1
	c24818_g1	103.702	6.69629	Q70DU8	Aldehyde dehydrogenase family 3 member H1 OS=Arabidopsis thaliana GN=ALDH3H1 PE=1 SV=2
	c142185_g1	102.545	6.68011	Q39224	Protein SRG1 OS=Arabidopsis thaliana GN=SRG1 PE=2 SV=1
	c64314_g1	101.888	6.67085
	c60127_g1	99.4434	6.6358	B6VJS4	Trans-resveratrol di-O-methyltransferase OS=Vitis vinifera GN=ROMT PE=1 SV=2
	c58960_g1	94.9873	6.56966	Q2HUS3	Amino acid/polyamine transporter II OS=Medicago truncatula GN=MTR_7g010790 PE=4 SV=1
	c110258_g1	93.0404	6.53979
	c57970_g5	92.2802	6.52795	O80622	Expansin-A15 OS=Arabidopsis thaliana GN=EXPA15 PE=2 SV=2
	c55562_g3	91.9076	6.52211	F4J5S1	Clustered mitochondria protein OS=Arabidopsis thaliana GN=FMT PE=2 SV=1
	c56049_g1	90.712	6.50322	Q6Q3H3	(-)-germacrene D synthase OS=Vitis vinifera GN=VIT_19s0014g04930 PE=1 SV=1
	c52738_g2	90.5755	6.50105	Q9LFT0	Protein trichome birefringence-like 19 OS=Arabidopsis thaliana GN=TBL19 PE=3 SV=1
	c63235_g5	90.0714	6.493	P92520	Uncharacterized mitochondrial protein AtMg00820 OS=Arabidopsis thaliana GN=AtMg00820 PE=4 SV=1
	c62700_g1	88.5312	6.46811	P10978	Retrovirus-related Pol polyprotein from transposon TNT 1-94 OS=Nicotiana tabacum PE=2 SV=1
	c60127_g8	87.8907	6.45764	B6VJS4	Trans-resveratrol di-O-methyltransferase OS=Vitis vinifera GN=ROMT PE=1 SV=2
	c50387_g2	86.319	6.43161	P30359	Probable cinnamyl alcohol dehydrogenase 1 OS=Nicotiana tabacum GN=CAD14 PE=1 SV=1
	c49260_g2	85.3209	6.41483
	c37931_g2	84.601	6.4026	P43309	Polyphenol oxidase, chloroplastic OS=Malus domestica PE=2 SV=1
	c51837_g2	83.6388	6.3861	Q93X17	Snakin-2 OS=Solanum tuberosum GN=SN2 PE=1 SV=1
	c78499_g1	82.9306	6.37383	Q672F7	Tricyclene synthase EBOS, chloroplastic OS=Lotus japonicus GN=EBOS PE=1 SV=1
	c120804_g1	81.1642	6.34277
	c50387_g1	81.1642	6.34277	P31656	Probable cinnamyl alcohol dehydrogenase OS=Medicago sativa GN=CAD2 PE=1 SV=1
	c22711_g2	80.169	6.32497	Q01861	Phenylalanine ammonia-lyase 1 OS=Pisum sativum GN=PAL1 PE=2 SV=1
	c122532_g1	79.6127	6.31493	Q9SJ52	Protein YLS9 OS=Arabidopsis thaliana GN=YLS9 PE=2 SV=1
	c62359_g6	79.2402	6.30816	Q9FLV9	S-type anion channel SLAH3 OS=Arabidopsis thaliana GN=SLAH3 PE=1 SV=1
	c63538_g9	79.175	6.30697
	c21024_g1	78.6321	6.29705
	c37931_g1	77.5784	6.27758	P43309	Polyphenol oxidase, chloroplastic OS=Malus domestica PE=2 SV=1
	c61512_g9	76.0528	6.24893	Q6YU51	Probable 1-deoxy-D-xylulose-5-phosphate synthase 2, chloroplastic OS=Oryza sativa subsp. japonica GN=Os07g0190000 PE=2 SV=1
	c10451_g1	74.5894	6.2209	A0A0B2RPA8	Putative cysteine desulfurase OS=Glycine soja GN=glysoja_030527 PE=4 SV=1
	c9997_g1	74.3719	6.21669	Q94KL7	Secoisolariciresinol dehydrogenase (Fragment) OS=Forsythia intermedia PE=1 SV=1
	c60758_g2	71.5746	6.16138	Q9C7U5	Glucan endo-1,3-beta-glucosidase 2 OS=Arabidopsis thaliana GN=At1g66250 PE=1 SV=2
	c23182_g1	70.671	6.14305	Q9SCU1	Patellin-6 OS=Arabidopsis thaliana GN=PATL6 PE=2 SV=1
	c7694_g1	70.4757	6.13905	Q9M153	GDSL esterase/lipase At4g01130 OS=Arabidopsis thaliana GN=At4g01130 PE=2 SV=1
	c92367_g1	70.0686	6.1307	P52581	Isoflavone reductase homolog OS=Lupinus albus PE=2 SV=1
	c61936_g2	69.288	6.11453	Q84MC0	Uncharacterized GPI-anchored protein At3g06035 OS=Arabidopsis thaliana GN=At3g06035 PE=2 SV=1
	c58908_g2	68.8833	6.10608	O48940	Polyphosphoinositide binding protein Ssh2p OS=Glycine max GN=SSH2 PE=2 SV=1
	c46469_g1	68.8082	6.10451	O81971	Cytochrome P450 71D9 OS=Glycine max GN=CYP71D9 PE=2 SV=1
	c63966_g1	67.5131	6.0771	Q70DU8	Aldehyde dehydrogenase family 3 member H1 OS=Arabidopsis thaliana GN=ALDH3H1 PE=1 SV=2
	c20094_g1	67.1821	6.07001	Q9SVU5	GDSL esterase/lipase At4g28780 OS=Arabidopsis thaliana GN=At4g28780 PE=2 SV=1
	c55619_g1	66.5727	6.05686	Q9LXN3	Probable fatty acyl-CoA reductase 4 OS=Arabidopsis thaliana GN=FAR4 PE=2 SV=1
	c54588_g2	66.5727	6.05686	Q39111	Gibberellin 20 oxidase 2 OS=Arabidopsis thaliana GN=GA20OX2 PE=2 SV=1
	c56589_g2	66.319	6.05135	Q9FH92	Protein IRX15-LIKE OS=Arabidopsis thaliana GN=IRX15-L PE=2 SV=1
	c53931_g2	62.6171	5.96848	B8XCH5	Protein QUIRKY OS=Arabidopsis thaliana GN=QKY PE=2 SV=1
	c45912_g1	61.515	5.94287	Q8RWU4	Homeobox-leucine zipper protein MERISTEM L1 OS=Arabidopsis thaliana GN=ATML1 PE=2 SV=1
	c58383_g6	60.6944	5.92349	Q94CH8	GDSL esterase/lipase EXL1 OS=Arabidopsis thaliana GN=EXL1 PE=2 SV=1
	c33038_g1	60.3809	5.91602
	c47958_g1	59.3026	5.89002	Q9LD90	H/ACA ribonucleoprotein complex subunit 4 OS=Arabidopsis thaliana GN=CBF5 PE=1 SV=1
	c4945_g1	58.5493	5.87158	Q9LT10	Probable carboxylesterase 18 OS=Arabidopsis thaliana GN=CXE18 PE=1 SV=1
	c47251_g1	58	5.85798	P13087	Miraculin OS=Synsepalum dulcificum PE=1 SV=3
	c24121_g1	57.741	5.85152	Q42374	Syntaxin-related protein KNOLLE OS=Arabidopsis thaliana GN=KN PE=1 SV=1
	c52909_g1	57.6818	5.85004	Q9SRW9	Cellulose synthase-like protein D5 OS=Arabidopsis thaliana GN=CSLD5 PE=2 SV=1
	c49171_g1	57.4119	5.84328	Q338N2	Zinc finger CCCH domain-containing protein 62 OS=Oryza sativa subsp. japonica GN=Os10g0391300 PE=3 SV=2
	c16844_g1	57.4119	5.84328	Q40374	Pathogenesis-related protein PR-1 OS=Medicago truncatula GN=PR-1 PE=2 SV=1
	c63206_g3	56.115	5.81031	P0CV94	(3S,6E)-nerolidol synthase 1 OS=Fragaria ananassa PE=1 SV=1
	c59692_g2	56.0664	5.80907	K7M3W9	Uncharacterized protein OS=Glycine max GN=GLYMA_13G362100 PE=4 SV=1
	c59083_g6	55.7146	5.79998	Q9C6Y3	Cyclin-A1-1 OS=Arabidopsis thaliana GN=CYCA1-1 PE=1 SV=1
	c120840_g1	55.6415	5.79809	Q43017	Non-specific lipid-transfer protein 1 OS=Prunus dulcis PE=3 SV=1
	c16501_g1	55.2267	5.78729
	c56114_g2	55.0366	5.78232	Q9LZL3	Aspartic proteinase PCS1 OS=Arabidopsis thaliana GN=PCS1 PE=2 SV=1
	c59464_g2	55.0167	5.7818	Q39891	Probable 2-isopropylmalate synthase OS=Glycine max GN=GMN56 PE=2 SV=1
	c53306_g1	55.0132	5.78171
	c39570_g1	54.9402	5.77979
	c29114_g1	54.8779	5.77815
	c49735_g4	54.5862	5.77046	A5JTQ3	Beta-xylosidase/alpha-L-arabinofuranosidase 2 OS=Medicago sativa subsp. varia GN=Xyl2 PE=2 SV=1
	c88957_g1	54.4428	5.76667
	c108186_g1	54.2835	5.76244	P09607	Pectinesterase 2.1 OS=Solanum lycopersicum GN=PME2.1 PE=2 SV=2
	c53378_g2	52.9411	5.72632	Q9SIB2	3-ketoacyl-CoA synthase 12 OS=Arabidopsis thaliana GN=KCS12 PE=2 SV=1
	c92859_g1	52.6397	5.71808
	c35947_g1	51.7353	5.69308
	c93092_g1	51.6445	5.69054	Q03211	Pistil-specific extensin-like protein OS=Nicotiana tabacum PE=2 SV=1
	c68595_g1	51.4738	5.68577	Q6NMK1	Glucuronoxylan 4-O-methyltransferase 1 OS=Arabidopsis thaliana GN=GXM1 PE=1 SV=1
	c41460_g2	51.4738	5.68577
	c111348_g1	50.9247	5.67029
	c122865_g1	50.9247	5.67029
	c60922_g1	50.7434	5.66515	Q9FQ19	Sister chromatid cohesion 1 protein 3 OS=Arabidopsis thaliana GN=SYN3 PE=2 SV=2
	c50439_g2	50.2862	5.65209
	c122817_g1	50.1795	5.64903	P31656	Probable cinnamyl alcohol dehydrogenase OS=Medicago sativa GN=CAD2 PE=1 SV=1
	c37582_g1	49.8894	5.64066	P93472	Delta(24)-sterol reductase OS=Pisum sativum GN=DIM PE=1 SV=1
	c57936_g1	49.4618	5.62824	Q8LC95	Early nodulin-like protein 3 OS=Arabidopsis thaliana GN=At5g25090 PE=1 SV=2
	c37150_g2	49.0985	5.61761	Q96575	Pectinesterase 2.2 OS=Solanum lycopersicum GN=PME2.2 PE=3 SV=1
	c60473_g4	49.045	5.61604
	c59954_g1	48.9615	5.61358	Q9SS03	Dirigent protein 21 OS=Arabidopsis thaliana GN=DIR21 PE=3 SV=1
	c56146_g1	48.7769	5.60813	Q07469	Bark storage protein A OS=Populus deltoides GN=BSPA PE=2 SV=1
	c44121_g1	48.576	5.60217
	c52974_g1	48.2768	5.59326
	c74072_g1	47.9441	5.58328
	c122379_g1	47.9397	5.58315	Q8W013	Caffeic acid 3-O-methyltransferase OS=Catharanthus roseus GN=COMT1 PE=2 SV=1
	c31931_g2	47.5715	5.57203	Q9FF86	BAHD acyltransferase DCR OS=Arabidopsis thaliana GN=DCR PE=2 SV=1
	c56981_g2	47.5715	5.57203	F4I2H7	Protein TPX2 OS=Arabidopsis thaliana GN=TPX2 PE=1 SV=1
	c63736_g4	47.4599	5.56864	P10978	Retrovirus-related Pol polyprotein from transposon TNT 1-94 OS=Nicotiana tabacum PE=2 SV=1
	c44455_g2	47.3171	5.56429	Q9SUC9	Uncharacterized GPI-anchored protein At4g28100 OS=Arabidopsis thaliana GN=At4g28100 PE=1 SV=1
	c106543_g1	46.0284	5.52445
	c53080_g1	45.7087	5.5144	Q93ZR6	O-acyltransferase WSD1 OS=Arabidopsis thaliana GN=WSD1 PE=2 SV=1
	c134744_g1	45.6796	5.51348	Q9LT10	Probable carboxylesterase 18 OS=Arabidopsis thaliana GN=CXE18 PE=1 SV=1
	c33109_g2	45.5357	5.50893
	c125068_g1	45.5163	5.50831	Q948Z4	Snakin-1 OS=Solanum tuberosum GN=SN1 PE=1 SV=1
	c49175_g1	45.4588	5.50649	Q8LE98	Interactor of constitutive active ROPs 1 OS=Arabidopsis thaliana GN=ICR1 PE=1 SV=1
	c56835_g2	44.3339	5.47034	Q94AP3	Protein WALLS ARE THIN 1 OS=Arabidopsis thaliana GN=WAT1 PE=1 SV=1
	c61772_g4	44.1581	5.46461	Q9SCT4	Probably inactive leucine-rich repeat receptor-like protein kinase IMK2 OS=Arabidopsis thaliana GN=IMK2 PE=1 SV=1
	c49735_g6	44.1251	5.46353	A5JTQ2	Beta-xylosidase/alpha-L-arabinofuranosidase 1 (Fragment) OS=Medicago sativa subsp. varia GN=Xyl1 PE=1 SV=1
	c79500_g1	44.0763	5.46193	Q9SR17	AT-hook motif nuclear-localized protein 19 OS=Arabidopsis thaliana GN=AHL19 PE=2 SV=1
	c135377_g1	43.8635	5.45495
	c47251_g2	43.6889	5.44919	P13087	Miraculin OS=Synsepalum dulcificum PE=1 SV=3
	c63155_g3	43.4155	5.44014	Q8L7Y8	Kinesin-like protein KIN12B OS=Arabidopsis thaliana GN=KIN12B PE=1 SV=1
	c53012_g3	43.1604	5.43164	Q9FEF8	Probable mediator of RNA polymerase II transcription subunit 36b OS=Arabidopsis thaliana GN=MED36B PE=1 SV=1
	c63375_g3	43.0733	5.42872	P25012	G2/mitotic-specific cyclin S13-7 (Fragment) OS=Glycine max PE=2 SV=1
	c61477_g1	42.8392	5.42086	B9T536	Terpene synthase 10 OS=Ricinus communis GN=TPS10 PE=2 SV=1
	c46341_g1	42.5916	5.4125	B9T536	Terpene synthase 10 OS=Ricinus communis GN=TPS10 PE=2 SV=1
	c48034_g1	42.2018	5.39923	G7IFC1	Uncharacterized protein OS=Medicago truncatula GN=MTR_2g010490 PE=4 SV=1
	c51154_g3	41.9728	5.39138	Q7Y1X1	Esterase OS=Hevea brasiliensis PE=1 SV=1
	c54441_g1	41.7487	5.38366	O22126	Fasciclin-like arabinogalactan protein 8 OS=Arabidopsis thaliana GN=FLA8 PE=1 SV=1
	c63653_g11	41.379	5.37083
	c57004_g2	41.2378	5.3659	A7PZL3	Probable polygalacturonase OS=Vitis vinifera GN=GSVIVT00026920001 PE=1 SV=1
	c57674_g1	41.1464	5.36269	Q41916	Cysteine proteinase inhibitor 5 OS=Arabidopsis thaliana GN=CYS5 PE=2 SV=2
	c52215_g2	41.0756	5.36021	P14009	14 kDa proline-rich protein DC2.15 OS=Daucus carota PE=2 SV=1
	c31582_g1	40.9795	5.35683
	c29330_g1	40.9364	5.35531	Q84JA6	Cellulose synthase A catalytic subunit 4 [UDP-forming] OS=Arabidopsis thaliana GN=CESA4 PE=1 SV=1
	c78947_g1	40.8652	5.3528
	c54032_g2	40.7852	5.34997
	c47980_g1	40.6359	5.34468	Q570S7	Cellulose synthase-like protein G1 OS=Arabidopsis thaliana GN=CSLG1 PE=2 SV=1
	c59620_g1	40.4694	5.33876
	c29603_g1	39.7561	5.31311	A4D998	Transcription factor bHLH75 OS=Arabidopsis thaliana GN=BHLH75 PE=2 SV=1
	c9097_g1	39.0038	5.28554
	c56244_g1	39.0038	5.28554
	c57570_g1	38.4588	5.26524	B9RAF8	Deoxycytidylate deaminase, putative OS=Ricinus communis GN=RCOM_1506180 PE=4 SV=1
	c57561_g1	38.3203	5.26004	A6BM07	Isoflavone 7-O-glucosyltransferase 1 OS=Glycine max GN=GmIF7GT1 PE=1 SV=1
	c36803_g2	38.2778	5.25844	Q8GU89	Pleiotropic drug resistance protein 4 OS=Oryza sativa subsp. japonica GN=PDR4 PE=2 SV=1
	c36834_g1	38.0713	5.25063
	c49735_g2	37.916	5.24473	A5JTQ3	Beta-xylosidase/alpha-L-arabinofuranosidase 2 OS=Medicago sativa subsp. varia GN=Xyl2 PE=2 SV=1
	c120375_g1	37.7694	5.23915	P15490	Stem 28 kDa glycoprotein OS=Glycine max GN=VSPA PE=2 SV=1
	c60127_g14	37.6623	5.23505	D4Q9Z4	Soyasapogenol B glucuronide galactosyltransferase OS=Glycine max GN=GmSGT2 PE=1 SV=1
	c54512_g1	37.5049	5.22901
	c120901_g1	37.4482	5.22683	Q8VYE5	Glucan endo-1,3-beta-glucosidase 12 OS=Arabidopsis thaliana GN=At4g29360 PE=1 SV=1
	c64428_g1	37.251	5.21921	Q53UH4	Anthocyanidin 3-O-glucoside 2''-O-glucosyltransferase OS=Ipomoea nil GN=3GGT PE=1 SV=1
	c59666_g2	36.928	5.20664
	c36834_g2	36.8899	5.20516
	c64415_g1	36.781	5.20089
	c54241_g2	36.6285	5.1949	Q8H4S4	NAC transcription factor ONAC010 OS=Oryza sativa subsp. japonica GN=ONAC010 PE=2 SV=1
	c54485_g1	36.5588	5.19215	Q9LFW3	COBRA-like protein 4 OS=Arabidopsis thaliana GN=COBL4 PE=2 SV=2
	c53017_g1	36.5361	5.19125	P22895	P34 probable thiol protease OS=Glycine max PE=1 SV=1
	c64851_g1	36.1065	5.17419	Q43716	Anthocyanidin 3-O-glucosyltransferase OS=Petunia hybrida GN=RT PE=2 SV=1
	c65731_g1	36.0634	5.17247	Q8LEJ6	Fasciclin-like arabinogalactan protein 11 OS=Arabidopsis thaliana GN=FLA11 PE=2 SV=2
	c44635_g1	36.0347	5.17132
	c59304_g1	36.0218	5.1708	Q9FMH5	Putative cyclin-A3-1 OS=Arabidopsis thaliana GN=CYCA3-1 PE=3 SV=1
	c15077_g1	36.0125	5.17043
	c53821_g1	35.9522	5.16801	O49523	Phospholipase A1-IIgamma OS=Arabidopsis thaliana GN=DSEL PE=1 SV=1
	c48111_g1	35.799	5.16185	D7L369	Predicted protein OS=Arabidopsis lyrata subsp. lyrata GN=ARALYDRAFT_672329 PE=4 SV=1
	c65827_g1	35.7247	5.15885	Q9FGS0	RNA-binding protein CP31B, chloroplastic OS=Arabidopsis thaliana GN=CP31B PE=1 SV=1
	c56162_g4	35.6096	5.1542	O82711	Kunitz-type trypsin inhibitor-like 2 protein OS=Pisum sativum GN=PIP20-2 PE=3 SV=1
	c13365_g1	35.5837	5.15314	Q03211	Pistil-specific extensin-like protein OS=Nicotiana tabacum PE=2 SV=1
	c68791_g1	35.4641	5.14829	Q6YU51	Probable 1-deoxy-D-xylulose-5-phosphate synthase 2, chloroplastic OS=Oryza sativa subsp. japonica GN=Os07g0190000 PE=2 SV=1
	c47739_g1	35.4409	5.14734	Q9FJ82	Putative 4-hydroxy-tetrahydrodipicolinate reductase 3, chloroplastic OS=Arabidopsis thaliana GN=DAPB3 PE=2 SV=1
	c28980_g1	35.4103	5.1461	A0A0B2RXM8	tRNA (Guanine(10)-N2)-methyltransferase like OS=Glycine soja GN=glysoja_028001 PE=4 SV=1
	c55975_g1	35.2832	5.14091	Q9FGQ7	Cyclin-D3-2 OS=Arabidopsis thaliana GN=CYCD3-2 PE=2 SV=1
	c53395_g1	35.2268	5.1386
	c59191_g3	35.1644	5.13604	Q9ZPE7	Protein EXORDIUM OS=Arabidopsis thaliana GN=EXO PE=2 SV=1
	c135965_g1	35.1306	5.13466
	c54485_g2	34.9891	5.12883	Q9LFW3	COBRA-like protein 4 OS=Arabidopsis thaliana GN=COBL4 PE=2 SV=2
	c60450_g2	34.978	5.12837	Q949Z1	Polygalacturonase At1g48100 OS=Arabidopsis thaliana GN=At1g48100 PE=2 SV=1
	c60867_g2	34.9665	5.1279	Q52QU2	AP2-like ethylene-responsive transcription factor AIL6 OS=Arabidopsis thaliana GN=AIL6 PE=2 SV=1
	c134447_g1	34.7788	5.12014	Q9SJB4	GDSL esterase/lipase At2g04570 OS=Arabidopsis thaliana GN=At2g04570 PE=2 SV=1
	c56579_g1	34.7062	5.11712	Q8LPL5	Protein FIZZY-RELATED 3 OS=Arabidopsis thaliana GN=FZR3 PE=1 SV=1
	c51278_g2	34.6623	5.11529
	c92466_g1	34.642	5.11445	A0A0B2Q2W7	U3 small nucleolar RNA-interacting protein 2 OS=Glycine soja GN=glysoja_012377 PE=4 SV=1
	c34352_g1	34.5315	5.10984	Q84M91	Probable microtubule-binding protein TANGLED OS=Arabidopsis thaliana GN=TAN PE=2 SV=1
	c46015_g1	34.3872	5.1038	Q9SF32	Protein IQ-DOMAIN 1 OS=Arabidopsis thaliana GN=IQD1 PE=1 SV=1
	c63878_g1	34.358	5.10258	P52914	Nucleoside-triphosphatase OS=Pisum sativum PE=2 SV=1
	c121194_g1	34.2533	5.09817
	c53370_g1	34.1589	5.09419
	c42614_g2	33.8444	5.08084	C0LGR3	Probable LRR receptor-like serine/threonine-protein kinase At4g26540 OS=Arabidopsis thaliana GN=At4g26540 PE=2 SV=1
	c47977_g1	33.6595	5.07294	Q9SUC3	Protein POLLENLESS 3 OS=Arabidopsis thaliana GN=MS5 PE=2 SV=2
	c73684_g1	33.6595	5.07294	Q9LZD8	UDP-glycosyltransferase 89A2 OS=Arabidopsis thaliana GN=UGT89A2 PE=2 SV=1
	c37869_g1	33.6595	5.07294
	c36803_g4	33.535	5.06759	Q9M9E1	ABC transporter G family member 40 OS=Arabidopsis thaliana GN=ABCG40 PE=1 SV=1
	c19490_g1	33.4654	5.0646	O23624	Flowering-promoting factor 1 OS=Arabidopsis thaliana GN=FPF1 PE=2 SV=1
	c56921_g5	33.4138	5.06237
	c47726_g1	33.2662	5.05599	O23826	125 kDa kinesin-related protein OS=Nicotiana tabacum GN=TKRP125 PE=1 SV=1
	c92392_g1	33.152	5.05102
	c38496_g2	33.0657	5.04726
	c68927_g1	33.0657	5.04726
	c16847_g1	33.0657	5.04726
	c106687_g1	32.5799	5.02591	O49298	Probable pectinesterase/pectinesterase inhibitor 6 OS=Arabidopsis thaliana GN=PME6 PE=2 SV=1
	c49735_g3	32.4719	5.02112	A5JTQ3	Beta-xylosidase/alpha-L-arabinofuranosidase 2 OS=Medicago sativa subsp. varia GN=Xyl2 PE=2 SV=1
	c62403_g6	32.3831	5.01717	Q9S9M8	Tubby-like protein 8 OS=Arabidopsis thaliana GN=TULP8 PE=2 SV=1
	c62557_g1	32.3538	5.01586
	c53142_g2	32.3099	5.01391	O23939	2-methylene-furan-3-one reductase OS=Fragaria vesca GN=EO PE=2 SV=2
	c58657_g3	32.2961	5.01329	P33083	Auxin-induced protein 6B OS=Glycine max PE=2 SV=1
	c58123_g1	32.2672	5.012	Q8LEJ6	Fasciclin-like arabinogalactan protein 11 OS=Arabidopsis thaliana GN=FLA11 PE=2 SV=2
	c52405_g1	32.068	5.00306
	c46825_g1	31.9909	4.99959	P25011	G2/mitotic-specific cyclin S13-6 OS=Glycine max PE=2 SV=1
	c134789_g1	31.9471	4.99761	Q94F88	DNA (cytosine-5)-methyltransferase CMT3 OS=Arabidopsis thaliana GN=CMT3 PE=1 SV=2
	c1547_g1	31.9443	4.99748	Q41249	Protochlorophyllide reductase, chloroplastic OS=Cucumis sativus GN=PORA PE=2 SV=1
	c44676_g1	31.8781	4.99449
	c48321_g1	31.8781	4.99449	Q94AP3	Protein WALLS ARE THIN 1 OS=Arabidopsis thaliana GN=WAT1 PE=1 SV=1
	c49735_g5	31.7427	4.98835	A5JTQ3	Beta-xylosidase/alpha-L-arabinofuranosidase 2 OS=Medicago sativa subsp. varia GN=Xyl2 PE=2 SV=1
	c93982_g1	31.5829	4.98107
	c61303_g5	31.5829	4.98107	Q84T03	DEAD-box ATP-dependent RNA helicase 27 OS=Oryza sativa subsp. japonica GN=Os03g0802700 PE=3 SV=1
	c8731_g1	31.5509	4.97961	Q9SQU6	Pentatricopeptide repeat-containing protein At3g06430, chloroplastic OS=Arabidopsis thaliana GN=EMB2750 PE=2 SV=1
	c60446_g1	31.5426	4.97923
	c55551_g2	31.5292	4.97862	Q9FNE9	Histone-lysine N-methyltransferase ATXR6 OS=Arabidopsis thaliana GN=ATXR6 PE=1 SV=1
	c139933_g1	31.2843	4.96737	Q9C9N5	Probable inactive leucine-rich repeat receptor-like protein kinase At1g66830 OS=Arabidopsis thaliana GN=At1g66830 PE=2 SV=1
	c35344_g1	31.2843	4.96737
	c59270_g3	31.2085	4.96387	Q2V6J9	UDP-glucose flavonoid 3-O-glucosyltransferase 7 OS=Fragaria ananassa GN=GT7 PE=1 SV=1
	c58922_g1	31.1527	4.96129	Q84ZT9	Protein WAVE-DAMPENED 2 OS=Arabidopsis thaliana GN=WVD2 PE=2 SV=1
	c61627_g1	31.1299	4.96023	O48788	Probable inactive receptor kinase At2g26730 OS=Arabidopsis thaliana GN=At2g26730 PE=1 SV=1
	c56612_g1	31.0842	4.95811	O80327	Thaumatin-like protein 1 OS=Pyrus pyrifolia GN=TL1 PE=1 SV=1
	c8625_g2	31.0326	4.95571
	c80607_g1	30.9088	4.94995
	c60377_g15	30.8058	4.94513	V7CKE8	Uncharacterized protein OS=Phaseolus vulgaris GN=PHAVU_002G170100g PE=4 SV=1
	c53378_g1	30.6905	4.93972	Q9LQP8	3-ketoacyl-CoA synthase 3 OS=Arabidopsis thaliana GN=KCS3 PE=2 SV=3
	c48915_g1	30.5275	4.93204	A0A061DYL2	S-adenosyl-L-methionine-dependent methyltransferases superfamily protein OS=Theobroma cacao GN=TCM_004668 PE=4 SV=1
	c49571_g2	30.2482	4.91878	Q94K41	Short-chain dehydrogenase reductase 3b OS=Arabidopsis thaliana GN=SDR3b PE=2 SV=1
	c50820_g1	30.2311	4.91796	I1J6T7	Uncharacterized protein OS=Glycine max GN=GLYMA_01G092300 PE=4 SV=1
	c55087_g2	30.2233	4.91759	Q9ZSK5	Zeatin O-glucosyltransferase OS=Phaseolus lunatus GN=ZOG1 PE=2 SV=1
	c42685_g1	30.1296	4.91311	Q9FJ40	GDSL esterase/lipase At5g45960 OS=Arabidopsis thaliana GN=At5g45960 PE=2 SV=1
	c62402_g1	30.0966	4.91153	Q8VWF8	DNA-directed RNA polymerase 2, chloroplastic/mitochondrial OS=Nicotiana sylvestris GN=RPOT2 PE=2 SV=2
	c55777_g1	30.0079	4.90727	Q5XVH5	Uncharacterized protein At1g65710 OS=Arabidopsis thaliana GN=At1g65710 PE=2 SV=1
	c51454_g1	29.6881	4.89181
	c56155_g1	29.6832	4.89158	Q9M9C5	Probable leucine-rich repeat receptor-like protein kinase At1g68400 OS=Arabidopsis thaliana GN=At1g68400 PE=2 SV=1
	c60425_g1	29.6716	4.89101	V7CUK9	Uncharacterized protein OS=Phaseolus vulgaris GN=PHAVU_001G000600g PE=4 SV=1
	c25543_g1	29.5028	4.88278
	c52175_g1	29.5028	4.88278	Q9SN11	Cyclin-D3-3 OS=Arabidopsis thaliana GN=CYCD3-3 PE=2 SV=1
	c63538_g3	29.4711	4.88123	O49675	Probable carotenoid cleavage dioxygenase 4, chloroplastic OS=Arabidopsis thaliana GN=CCD4 PE=1 SV=1
	c56579_g2	29.4703	4.88119	Q8LPL5	Protein FIZZY-RELATED 3 OS=Arabidopsis thaliana GN=FZR3 PE=1 SV=1
	c47469_g2	29.3249	4.87405	Q8S949	Kinesin-like protein NACK2 OS=Nicotiana tabacum GN=NACK2 PE=1 SV=1
	c39284_g1	29.3249	4.87405
	c63601_g3	29.1808	4.86695
	c120916_g1	29.0619	4.86106
	c58558_g1	28.9896	4.85746	Q9FIY7	Putative SWI/SNF-related matrix-associated actin-dependent regulator of chromatin subfamily A member 3-like 3 OS=Arabidopsis thaliana GN=At5g43530 PE=3 SV=1
	c61102_g1	28.9129	4.85364	P25011	G2/mitotic-specific cyclin S13-6 OS=Glycine max PE=2 SV=1
	c33819_g1	28.909	4.85345	Q0WSH6	Pentatricopeptide repeat-containing protein At4g14850 OS=Arabidopsis thaliana GN=LOI1 PE=1 SV=1
	c52285_g2	28.8809	4.85204	Q00451	36.4 kDa proline-rich protein OS=Solanum lycopersicum GN=TPRP-F1 PE=2 SV=1
	c92503_g1	28.6445	4.84019
	c48981_g1	28.6212	4.83901	C0LGS2	Probable LRR receptor-like serine/threonine-protein kinase At4g36180 OS=Arabidopsis thaliana GN=At4g36180 PE=2 SV=1
	c92562_g1	28.5774	4.8368	P83948	Pectinesterase 3 OS=Citrus sinensis PE=1 SV=1
	c37628_g1	28.5282	4.83432	Q94C59	Patellin-4 OS=Arabidopsis thaliana GN=PATL4 PE=1 SV=2
	c35600_g2	28.4259	4.82913	Q9T012	High mobility group B protein 13 OS=Arabidopsis thaliana GN=HMGB13 PE=2 SV=1
	c58393_g1	28.3792	4.82676	Q9SD82	Replication protein A 70 kDa DNA-binding subunit B OS=Arabidopsis thaliana GN=RPA1B PE=3 SV=1
	c57210_g1	28.3152	4.82351
	c58186_g5	28.3152	4.82351
	c63308_g6	28.2693	4.82117	P37392	Tubulin beta-1 chain OS=Lupinus albus GN=TUBB1 PE=3 SV=1
	c64882_g1	28.229	4.81911
	c36602_g2	28.1978	4.81751	A0A072TYL1	C3HC4-type RING zinc finger protein OS=Medicago truncatula GN=MTR_7g035445 PE=4 SV=1
	c113109_g1	28.1978	4.81751
	c16186_g1	28.1517	4.81515	Q8LF99	Probable xyloglucan endotransglucosylase/hydrolase protein 6 OS=Arabidopsis thaliana GN=XTH6 PE=2 SV=2
	c16663_g1	28.1441	4.81476
	c37116_g1	28.0934	4.81216	O64864	Protein YLS3 OS=Arabidopsis thaliana GN=YLS3 PE=2 SV=1
	c61098_g7	28.0691	4.81091	Q9FJY7	Pentatricopeptide repeat-containing protein At5g66520 OS=Arabidopsis thaliana GN=PCMP-H61 PE=2 SV=1
	c106328_g1	28.0611	4.8105	Q9SAC4	F-box protein At1g10780 OS=Arabidopsis thaliana GN=At1g10780 PE=2 SV=1
	c121158_g1	27.9389	4.80421	Q9M363	Cytochrome b561 and DOMON domain-containing protein At3g61750 OS=Arabidopsis thaliana GN=At3g61750 PE=3 SV=1
	c16648_g1	27.8589	4.80007	Q94KL7	Secoisolariciresinol dehydrogenase (Fragment) OS=Forsythia intermedia PE=1 SV=1
	c121078_g1	27.8252	4.79832
	c60577_g1	27.8252	4.79832	Q9CAN3	Scarecrow-like protein 28 OS=Arabidopsis thaliana GN=SCL28 PE=1 SV=1
	c61797_g1	27.7536	4.7946	B9T536	Terpene synthase 10 OS=Ricinus communis GN=TPS10 PE=2 SV=1
	c59554_g1	27.7473	4.79427
	c17691_g1	27.6863	4.7911	Q9SND9	Uncharacterized acetyltransferase At3g50280 OS=Arabidopsis thaliana GN=At3g50280 PE=3 SV=1
	c48896_g1	27.5656	4.7848	Q43086	Aspartate carbamoyltransferase 1, chloroplastic OS=Pisum sativum GN=PYRB1 PE=2 SV=1
	c120727_g1	27.559	4.78445	Q9SF78	GDSL esterase/lipase At1g71691 OS=Arabidopsis thaliana GN=At1g71691 PE=2 SV=1
	c66023_g1	27.4952	4.78111	Q9FVS9	Alkane hydroxylase MAH1 OS=Arabidopsis thaliana GN=CYP96A15 PE=2 SV=1
	c125139_g1	27.4526	4.77887	Q948Z4	Snakin-1 OS=Solanum tuberosum GN=SN1 PE=1 SV=1
	c59237_g4	27.4526	4.77887	A0A151TBE7	Retrovirus-related Pol polyprotein from transposon 17.6 OS=Cajanus cajan GN=KK1_018949 PE=4 SV=1
	c63696_g9	27.4352	4.77796	Q9SU79	Probable polyamine oxidase 5 OS=Arabidopsis thaliana GN=PAO5 PE=2 SV=1
	c12635_g1	27.4232	4.77733	Q9SU24	Origin of replication complex subunit 1B OS=Arabidopsis thaliana GN=ORC1B PE=1 SV=1
	c60870_g4	27.408	4.77652	A0A0B2P6W5	Kinesin-like protein KIF11 OS=Glycine soja GN=glysoja_013992 PE=3 SV=1
	c39185_g1	27.3702	4.77453	A0A151TAQ5	Protein sym-1 OS=Cajanus cajan GN=KK1_018710 PE=3 SV=1
	c54102_g6	27.2287	4.76706	Q76CU2	Pleiotropic drug resistance protein 1 OS=Nicotiana tabacum GN=PDR1 PE=2 SV=1
	c48578_g2	27.205	4.7658	P68428	Histone H3.2 OS=Triticum aestivum PE=1 SV=2
	c2568_g1	27.1896	4.76498	P40620	HMG1/2-like protein OS=Vicia faba PE=2 SV=1
	c121057_g1	27.1444	4.76258	Q41350	Osmotin-like protein OS=Solanum lycopersicum PE=1 SV=1
	c48981_g2	27.1276	4.76169	C0LGS2	Probable LRR receptor-like serine/threonine-protein kinase At4g36180 OS=Arabidopsis thaliana GN=At4g36180 PE=2 SV=1
	c49728_g1	27.1276	4.76169	Q9SJR5	Growth-regulating factor 3 OS=Arabidopsis thaliana GN=GRF3 PE=2 SV=1
	c26457_g1	27.1276	4.76169
	c38793_g1	27.0801	4.75916	Q9LTB8	Calcineurin B-like protein 9 OS=Arabidopsis thaliana GN=CBL9 PE=1 SV=3
	c109438_g1	27.0801	4.75916	Q43846	Soluble starch synthase 3, chloroplastic/amyloplastic OS=Solanum tuberosum GN=SS3 PE=1 SV=1
	c16919_g1	27.0801	4.75916	B8XCH5	Protein QUIRKY OS=Arabidopsis thaliana GN=QKY PE=2 SV=1
	c122406_g1	27.028	4.75638	Q6DR04	Reticulon-like protein B17 OS=Arabidopsis thaliana GN=RTNLB17 PE=2 SV=1
	c61409_g2	27.0222	4.75607	Q43695	Tubulin beta-3 chain OS=Zea mays GN=TUBB3 PE=2 SV=1
	c50210_g1	26.9934	4.75453
	c58123_g2	26.9851	4.75409	Q8LEJ6	Fasciclin-like arabinogalactan protein 11 OS=Arabidopsis thaliana GN=FLA11 PE=2 SV=2
	c26955_g1	26.9246	4.75085
	c61512_g5	26.8615	4.74747	Q6YU51	Probable 1-deoxy-D-xylulose-5-phosphate synthase 2, chloroplastic OS=Oryza sativa subsp. japonica GN=Os07g0190000 PE=2 SV=1
	c48726_g1	26.8324	4.7459
	c15262_g1	26.8324	4.7459
	c52215_g3	26.817	4.74508	P14009	14 kDa proline-rich protein DC2.15 OS=Daucus carota PE=2 SV=1
	c62838_g3	26.7869	4.74346	P93092	Acyl carrier protein 1, chloroplastic OS=Casuarina glauca GN=ACP1 PE=2 SV=1
	c37801_g1	26.7124	4.73944	Q58G01	Transcription factor bHLH155 OS=Arabidopsis thaliana GN=BHLH155 PE=2 SV=1
	c39101_g1	26.7075	4.73917
	c39050_g1	26.6793	4.73765	Q9LMA1	Probable flavin-containing monooxygenase 1 OS=Arabidopsis thaliana GN=FMO1 PE=2 SV=1
	c37761_g1	26.6436	4.73572	Q8LG64	Cyclin-dependent kinase B2-2 OS=Arabidopsis thaliana GN=CDKB2-2 PE=1 SV=2
	c62635_g1	26.6314	4.73506	O49858	Cytochrome P450 82A3 OS=Glycine max GN=CYP82A3 PE=2 SV=1
	c61160_g6	26.6189	4.73438	C6TL13	Uncharacterized protein OS=Glycine max GN=GLYMA_19G019000 PE=2 SV=1
	c53931_g1	26.5338	4.72976	B8XCH5	Protein QUIRKY OS=Arabidopsis thaliana GN=QKY PE=2 SV=1
	c51868_g1	26.5338	4.72976	Q75W16	Phospho-2-dehydro-3-deoxyheptonate aldolase 2, chloroplastic OS=Oryza sativa subsp. japonica GN=DAHPS2 PE=2 SV=1
	c65588_g1	26.5338	4.72976
	c60990_g1	26.5154	4.72876	O04536	Probable galacturonosyltransferase-like 9 OS=Arabidopsis thaliana GN=GATL9 PE=2 SV=1
	c55736_g1	26.51	4.72847	E2CZ99	Maturase K OS=Taraxis grossa GN=mat-K PE=3 SV=1
	c56928_g2	26.4763	4.72663	Q9M394	Fructokinase-like 1, chloroplastic OS=Arabidopsis thaliana GN=FLN1 PE=1 SV=1
	c61697_g7	26.3341	4.71886	Q8LK56	Transcriptional activator DEMETER OS=Arabidopsis thaliana GN=DME PE=1 SV=2
	c20299_g1	26.2841	4.71612	O22682	Probable S-sulfocysteine synthase, chloroplastic OS=Arabidopsis thaliana GN=At3g03630 PE=1 SV=1
	c60558_g1	26.2471	4.71409	O80837	Remorin OS=Arabidopsis thaliana GN=DBP PE=1 SV=1
	c16292_g1	26.244	4.71392	Q9FMC2	Basic leucine zipper 43 OS=Arabidopsis thaliana GN=BZIP43 PE=1 SV=1
	c136252_g1	26.1359	4.70796	Q9LZS7	GDSL esterase/lipase At5g03610 OS=Arabidopsis thaliana GN=At5g03610 PE=2 SV=1
	c109544_g1	26.117	4.70692
	c51749_g1	25.9849	4.6996	Q41350	Osmotin-like protein OS=Solanum lycopersicum PE=1 SV=1
	c56450_g3	25.9623	4.69835	Q9SZI6	Putative GATA transcription factor 22 OS=Arabidopsis thaliana GN=GATA22 PE=3 SV=1
	c61098_g2	25.9623	4.69835	O64481	Subtilisin-like protease SBT2.5 OS=Arabidopsis thaliana GN=SBT2.5 PE=2 SV=1
	c60957_g4	25.9623	4.69835
	c60739_g1	25.94	4.69711	V7CFA1	Sulfotransferase OS=Phaseolus vulgaris GN=PHAVU_002G019900g PE=3 SV=1
	c53554_g1	25.94	4.69711
	c92566_g1	25.94	4.69711	Q9SIT7	Pentatricopeptide repeat-containing protein At2g13600 OS=Arabidopsis thaliana GN=PCMP-E76 PE=3 SV=1
	c120446_g1	25.8862	4.69411	Q9SS03	Dirigent protein 21 OS=Arabidopsis thaliana GN=DIR21 PE=3 SV=1
	c108455_g1	25.8793	4.69372
	c53142_g4	25.8446	4.69179	O23939	2-methylene-furan-3-one reductase OS=Fragaria vesca GN=EO PE=2 SV=2
	c20094_g2	25.8338	4.69119	Q8LB81	GDSL esterase/lipase At5g33370 OS=Arabidopsis thaliana GN=At5g33370 PE=2 SV=1
	c20511_g1	25.8141	4.69009	A0A0B2PZ75	Protein FAM179B-like protein OS=Glycine soja GN=glysoja_024716 PE=4 SV=1
	c128540_g1	25.7826	4.68832	Q94KL7	Secoisolariciresinol dehydrogenase (Fragment) OS=Forsythia intermedia PE=1 SV=1
	c53009_g1	25.7649	4.68734	Q42908	2,3-bisphosphoglycerate-independent phosphoglycerate mutase OS=Mesembryanthemum crystallinum GN=PGM1 PE=2 SV=1
	c60581_g1	25.7542	4.68674	A0A0B2PZS7	Condensin-2 complex subunit D3 OS=Glycine soja GN=glysoja_024710 PE=4 SV=1
	c70050_g1	25.731	4.68544
	c58605_g4	25.6304	4.67978
	c54399_g1	25.5765	4.67675	Q9LYR6	Protein NRT1/ PTR FAMILY 6.1 OS=Arabidopsis thaliana GN=NPF6.1 PE=2 SV=1
	c46813_g1	25.4297	4.66844	Q9LT96	Probable leucine-rich repeat receptor-like protein kinase At5g49770 OS=Arabidopsis thaliana GN=At5g49770 PE=2 SV=1
	c120440_g1	25.4197	4.66788	I1LMB5	Uncharacterized protein OS=Glycine max GN=GLYMA_11G215600 PE=4 SV=2
	c134500_g1	25.4126	4.66747	D4Q9Z4	Soyasapogenol B glucuronide galactosyltransferase OS=Glycine max GN=GmSGT2 PE=1 SV=1
	c138207_g1	25.3922	4.66632
	c60545_g2	25.3462	4.6637	Q9ZVH3	Origin of replication complex subunit 6 OS=Arabidopsis thaliana GN=ORC6 PE=1 SV=2
	c55728_g1	25.3462	4.6637	P93293	Uncharacterized mitochondrial protein AtMg00300 OS=Arabidopsis thaliana GN=AtMg00300 PE=4 SV=1
	c57790_g7	25.3462	4.6637
	c86915_g1	25.3379	4.66323
	c38441_g2	25.3067	4.66144	Q8LDV3	Uncharacterized protein At4g13200, chloroplastic OS=Arabidopsis thaliana GN=At4g13200 PE=2 SV=2
	c59783_g2	25.2453	4.65794	O82089	Copper transport protein CCH OS=Arabidopsis thaliana GN=CCH PE=1 SV=1
	c78722_g1	25.2279	4.65695
	c127776_g1	25.2172	4.65634	Q43092	Granule-bound starch synthase 1, chloroplastic/amyloplastic OS=Pisum sativum PE=1 SV=1
	c64111_g1	25.2172	4.65634	Q9M1E6	Dof zinc finger protein DOF3.2 OS=Arabidopsis thaliana GN=DOF3.2 PE=2 SV=1
	c53366_g1	25.1582	4.65296	Q96449	Meiotic recombination protein DMC1 homolog OS=Glycine max PE=2 SV=1
	c45544_g4	25.1582	4.65296	Q9M8Y5	GDSL esterase/lipase LTL1 OS=Arabidopsis thaliana GN=LTL1 PE=2 SV=1
	c81837_g1	25.1355	4.65165	Q9FZ86	PLASMODESMATA CALLOSE-BINDING PROTEIN 3 OS=Arabidopsis thaliana GN=PDCB3 PE=1 SV=1
	c111453_g1	25.1248	4.65104	Q9FLE8	Uncharacterized protein At5g39865 OS=Arabidopsis thaliana GN=At5g39865 PE=2 SV=1
	c78904_g1	25.1067	4.65	Q9FHM9	Protein EXORDIUM-like 3 OS=Arabidopsis thaliana GN=EXL3 PE=2 SV=1
	c125482_g1	25.0759	4.64823	P43286	Aquaporin PIP2-1 OS=Arabidopsis thaliana GN=PIP2-1 PE=1 SV=1
	c58532_g5	25.0698	4.64788	P0CG89	Histone H4 OS=Glycine max PE=3 SV=1
	c8677_g1	25.0349	4.64587	O50064	Fimbrin-2 OS=Arabidopsis thaliana GN=FIM2 PE=2 SV=1
	c58445_g1	25.0071	4.64426	O82134	Proliferating cell nuclear antigen OS=Pisum sativum GN=PCNA PE=2 SV=1
	c134321_g1	24.9241	4.63947	Q07469	Bark storage protein A OS=Populus deltoides GN=BSPA PE=2 SV=1
	c34052_g1	24.911	4.63871
	c93717_g1	24.911	4.63871
	c29436_g1	24.8883	4.63739	Q9S7G6	Polyribonucleotide nucleotidyltransferase 2, mitochondrial OS=Arabidopsis thaliana GN=PNP2 PE=2 SV=1
	c60545_g3	24.8868	4.63731	Q9ZVH3	Origin of replication complex subunit 6 OS=Arabidopsis thaliana GN=ORC6 PE=1 SV=2
	c56699_g1	24.8868	4.63731
	c58968_g2	24.8446	4.63486	Q9LW63	Putative pentatricopeptide repeat-containing protein At3g23330 OS=Arabidopsis thaliana GN=PCMP-H32 PE=3 SV=1
	c63105_g6	24.7734	4.63072	Q84JA6	Cellulose synthase A catalytic subunit 4 [UDP-forming] OS=Arabidopsis thaliana GN=CESA4 PE=1 SV=1
	c76840_g1	24.7524	4.62949	Q2V6J9	UDP-glucose flavonoid 3-O-glucosyltransferase 7 OS=Fragaria ananassa GN=GT7 PE=1 SV=1
	c23414_g1	24.7524	4.62949
	c64487_g1	24.722	4.62773	Q42374	Syntaxin-related protein KNOLLE OS=Arabidopsis thaliana GN=KN PE=1 SV=1
	c64106_g1	24.6898	4.62584	Q94CH6	GDSL esterase/lipase EXL3 OS=Arabidopsis thaliana GN=EXL3 PE=2 SV=1
	c106931_g1	24.622	4.62187	A0A072VMA4	Kinesin light chain, putative OS=Medicago truncatula GN=MTR_1g070145 PE=4 SV=1
	c52138_g1	24.622	4.62187	G7LA89	Regulator of Vps4 activity in the MVB pathway protein OS=Medicago truncatula GN=MTR_8g074540 PE=4 SV=2
	c47822_g1	24.6154	4.62149	Q39131	Lamin-like protein OS=Arabidopsis thaliana GN=At5g15350 PE=1 SV=1
	c57691_g3	24.5364	4.61685	Q9SX73	Kinase-interacting family protein OS=Arabidopsis thaliana GN=At1g48405 PE=2 SV=1
	c64416_g1	24.484	4.61377	Q0WSF1	Aldehyde dehydrogenase 22A1 OS=Arabidopsis thaliana GN=ALDH22A1 PE=2 SV=2
	c59917_g1	24.4721	4.61306
	c35600_g1	24.4721	4.61306	Q9SUP7	High mobility group B protein 6 OS=Arabidopsis thaliana GN=HMGB6 PE=2 SV=1
	c120510_g1	24.4493	4.61172	O24308	DNA topoisomerase 2 OS=Pisum sativum GN=TOP2 PE=2 SV=1
	c60222_g1	24.4166	4.60979	P52410	3-oxoacyl-[acyl-carrier-protein] synthase I, chloroplastic OS=Arabidopsis thaliana GN=KAS1 PE=2 SV=2
	c27594_g1	24.4109	4.60946	I1QM70	Uncharacterized protein OS=Oryza glaberrima PE=4 SV=1
	c36903_g1	24.3392	4.60521	Q9AT54	Scopoletin glucosyltransferase OS=Nicotiana tabacum GN=TOGT1 PE=1 SV=1
	c55938_g1	24.1649	4.59484	G7JFA7	Transmembrane protein, putative OS=Medicago truncatula GN=MTR_4g097790 PE=4 SV=1
	c46711_g1	24.1586	4.59446	P0C8Q5	Pentatricopeptide repeat-containing protein At4g22760 OS=Arabidopsis thaliana GN=PCMP-E6 PE=2 SV=1
	c45544_g3	24.1586	4.59446	Q9SVU5	GDSL esterase/lipase At4g28780 OS=Arabidopsis thaliana GN=At4g28780 PE=2 SV=1
	c63855_g2	24.0995	4.59093
	c51868_g4	24.057	4.58839	P21357	Phospho-2-dehydro-3-deoxyheptonate aldolase 1, chloroplastic OS=Solanum tuberosum GN=SHKA PE=1 SV=2
	c58455_g1	24.057	4.58839
	c2393_g1	24.0075	4.58541	Q6YW46	Elongation factor 1-gamma 2 OS=Oryza sativa subsp. japonica GN=Os02g0220500 PE=2 SV=2
	c56950_g1	23.9046	4.57922	Q9LTT3	High mobility group B protein 10 OS=Arabidopsis thaliana GN=HMGB10 PE=2 SV=1
	c53532_g1	23.9046	4.57922
	c55422_g3	23.9046	4.57922	Q2V6J9	UDP-glucose flavonoid 3-O-glucosyltransferase 7 OS=Fragaria ananassa GN=GT7 PE=1 SV=1
	c56953_g1	23.8961	4.57871	O48928	Cytochrome P450 77A3 OS=Glycine max GN=CYP77A3 PE=2 SV=1
	c122693_g1	23.8576	4.57638	P93841	4-diphosphocytidyl-2-C-methyl-D-erythritol kinase, chloroplastic/chromoplastic (Fragment) OS=Solanum lycopersicum GN=ISPE PE=1 SV=1
	c51314_g1	23.8345	4.57498	Q9M2E2	(+)-neomenthol dehydrogenase OS=Arabidopsis thaliana GN=SDR1 PE=1 SV=1
	c58644_g2	23.8004	4.57292	Q8L7T3	Ubiquitin-conjugating enzyme E2 20 OS=Arabidopsis thaliana GN=UBC20 PE=2 SV=1
	c106300_g1	23.7929	4.57246	Q9SLN8	2-alkenal reductase (NADP(+)-dependent) OS=Nicotiana tabacum GN=DBR PE=1 SV=1
	c60577_g2	23.7892	4.57223	Q9CAN3	Scarecrow-like protein 28 OS=Arabidopsis thaliana GN=SCL28 PE=1 SV=1
	c114884_g1	23.7269	4.56845
	c48937_g1	23.7269	4.56845	Q9SAC4	F-box protein At1g10780 OS=Arabidopsis thaliana GN=At1g10780 PE=2 SV=1
	c60864_g1	23.6758	4.56534	C0LGF4	LRR receptor-like serine/threonine-protein kinase FEI 1 OS=Arabidopsis thaliana GN=FEI1 PE=1 SV=1
	c49139_g1	23.6727	4.56515	O80494	F-box protein PP2-B15 OS=Arabidopsis thaliana GN=PP2B15 PE=2 SV=2
	c60288_g1	23.6145	4.5616	P93164	Gamma-glutamyl hydrolase OS=Glycine max PE=2 SV=1
	c46503_g2	23.5911	4.56017	Q9M160	Uncharacterized protein At4g00950 OS=Arabidopsis thaliana GN=At4g00950 PE=2 SV=1
	c59452_g3	23.5647	4.55856	Q39092	Zinc finger protein ZAT1 OS=Arabidopsis thaliana GN=ZAT1 PE=2 SV=1
	c62625_g9	23.5647	4.55856
	c41524_g1	23.5647	4.55856	Q8L778	Cellulose synthase A catalytic subunit 5 [UDP-forming] OS=Arabidopsis thaliana GN=CESA5 PE=1 SV=2
	c36902_g1	23.5647	4.55856
	c32987_g1	23.5647	4.55856	P10582	DNA polymerase OS=Zea mays PE=3 SV=1
	c59664_g1	23.5046	4.55487	Q6AST1	Homeobox-leucine zipper protein HOX32 OS=Oryza sativa subsp. japonica GN=HOX32 PE=2 SV=1
	c59197_g6	23.3903	4.54784	Q6R2J8	Protein STRUBBELIG-RECEPTOR FAMILY 8 OS=Arabidopsis thaliana GN=SRF8 PE=2 SV=1
	c48614_g1	23.3606	4.54601	O82266	Protein SLOW WALKER 1 OS=Arabidopsis thaliana GN=SWA1 PE=2 SV=1
	c53633_g1	23.3543	4.54562	Q66GR8	Protein NETWORKED 3A OS=Arabidopsis thaliana GN=NET3A PE=2 SV=1
	c84677_g1	23.3543	4.54562
	c57826_g1	23.3456	4.54508	A0A151RQR0	Galactose oxidase OS=Cajanus cajan GN=KK1_033635 PE=4 SV=1
	c60288_g2	23.2864	4.54141	O65355	Gamma-glutamyl hydrolase 2 OS=Arabidopsis thaliana GN=GGH2 PE=1 SV=2
	c136137_g1	23.2691	4.54034
	c56003_g1	23.265	4.54009
	c135247_g1	23.2629	4.53996	Q2QNM1	DNA replication licensing factor MCM7 OS=Oryza sativa subsp. japonica GN=MCM7 PE=2 SV=1
	c92739_g1	23.1639	4.5338	A2ZW16	Phospholipase A1-II 1 OS=Oryza sativa subsp. japonica GN=Os01g0651100 PE=3 SV=2
	c62896_g3	22.9995	4.52353	A0A0B2S2V5	Putative phosphatidylglycerol/phosphatidylinositol transfer protein OS=Glycine soja GN=glysoja_004142 PE=4 SV=1
	c62010_g2	22.9896	4.52291	Q0WUQ1	BAG family molecular chaperone regulator 1 OS=Arabidopsis thaliana GN=BAG1 PE=1 SV=1
	c107373_g1	22.9818	4.52242	Q8S950	Kinesin-like protein NACK1 OS=Nicotiana tabacum GN=NACK1 PE=1 SV=1
	c53452_g1	22.9709	4.52174
	c23811_g1	22.9709	4.52174
	c36141_g2	22.9709	4.52174
	c63474_g2	22.9709	4.52174	Q7XQ88	Dolichyl-diphosphooligosaccharide--protein glycosyltransferase subunit STT3B OS=Oryza sativa subsp. japonica GN=STT3B PE=2 SV=2
	c122003_g1	22.9233	4.51875	Q8LPF3	Probable pectinesterase 68 OS=Arabidopsis thaliana GN=PME68 PE=2 SV=1
	c59989_g3	22.9056	4.51763	P50699	Thaumatin-like protein OS=Arabidopsis thaliana GN=At1g18250 PE=2 SV=2
	c78369_g1	22.8589	4.51468	Q8LB72	Blue-light photoreceptor PHR2 OS=Arabidopsis thaliana GN=PHR2 PE=2 SV=2
	c57970_g2	22.7884	4.51023	Q9LDR9	Expansin-A10 OS=Arabidopsis thaliana GN=EXPA10 PE=2 SV=1
	c65007_g1	22.7761	4.50945	Q9FI13	Probable ribose-5-phosphate isomerase 4, chloroplastic OS=Arabidopsis thaliana GN=RPI4 PE=2 SV=1
	c43869_g1	22.7703	4.50908
	c58488_g2	22.7573	4.50826	Q93ZR6	O-acyltransferase WSD1 OS=Arabidopsis thaliana GN=WSD1 PE=2 SV=1
	c34069_g1	22.7549	4.50811	Q2V6J9	UDP-glucose flavonoid 3-O-glucosyltransferase 7 OS=Fragaria ananassa GN=GT7 PE=1 SV=1
	c62942_g4	22.6935	4.5042	A0A151TQE9	Protein AATF OS=Cajanus cajan GN=KK1_008456 PE=4 SV=1
	c54779_g1	22.6638	4.50232	M5WRW3	Uncharacterized protein OS=Prunus persica GN=PRUPE_ppa005319mg PE=4 SV=1
	c58945_g1	22.6632	4.50228	F4I0K2	Fructokinase-like 2, chloroplastic OS=Arabidopsis thaliana GN=FLN2 PE=1 SV=2
	c23470_g1	22.6073	4.49872	Q9SE20	Zeta-carotene desaturase, chloroplastic/chromoplastic OS=Solanum lycopersicum GN=ZDS PE=2 SV=1
	c61797_g2	22.6017	4.49836	P10978	Retrovirus-related Pol polyprotein from transposon TNT 1-94 OS=Nicotiana tabacum PE=2 SV=1
	c61386_g3	22.5626	4.49586	P10978	Retrovirus-related Pol polyprotein from transposon TNT 1-94 OS=Nicotiana tabacum PE=2 SV=1
	c59044_g1	22.5524	4.49521	Q8W487	Uncharacterized protein At2g39795, mitochondrial OS=Arabidopsis thaliana GN=At2g39795 PE=2 SV=1
	c64052_g1	22.5176	4.49298	P81651	Non-specific lipid-transfer protein 1 OS=Prunus armeniaca PE=1 SV=2
	c79349_g1	22.4754	4.49027	Q9FZ24	Pentatricopeptide repeat-containing protein At1g02370, mitochondrial OS=Arabidopsis thaliana GN=At1g02370 PE=2 SV=1
	c62306_g11	22.4438	4.48825	Q8RYD1	B3 domain-containing protein REM16 OS=Arabidopsis thaliana GN=REM16 PE=2 SV=1
	c59880_g6	22.4186	4.48662	Q1PEU4	Pentatricopeptide repeat-containing protein At2g44880 OS=Arabidopsis thaliana GN=PCMP-E9 PE=2 SV=2
	c120892_g1	22.3977	4.48528	O64416	Ribulose bisphosphate carboxylase small chain, chloroplastic OS=Marchantia paleacea GN=RBCS PE=2 SV=1
	c113119_g1	22.3771	4.48395
	c51919_g3	22.3771	4.48395	Q38741	Squamosa promoter-binding protein 1 OS=Antirrhinum majus GN=SBP1 PE=2 SV=1
	c37097_g1	22.3771	4.48395	Q8L925	Protein CRABS CLAW OS=Arabidopsis thaliana GN=CRC PE=1 SV=2
	c52847_g2	22.3491	4.48214
	c62684_g4	22.3246	4.48056	Q27IK7	Phragmoplast orienting kinesin-1 OS=Arabidopsis thaliana GN=POK1 PE=1 SV=1
	c94847_g1	22.3034	4.47919	P0CG89	Histone H4 OS=Glycine max PE=3 SV=1
	c51028_g2	22.2863	4.47808
	c60014_g1	22.2446	4.47538	Q8LGE3	Actin-related protein 6 OS=Arabidopsis thaliana GN=ARP6 PE=1 SV=1
	c141308_g1	22.2366	4.47487
	c45808_g1	22.2318	4.47455	F4K295	Rop guanine nucleotide exchange factor 5 OS=Arabidopsis thaliana GN=ROPGEF5 PE=2 SV=1
	c66270_g1	22.2138	4.47338	Q9S7X6	Thermospermine synthase ACAULIS5 OS=Arabidopsis thaliana GN=ACL5 PE=1 SV=1
	c122517_g1	22.2064	4.4729	Q9ZUY3	Arogenate dehydratase 3, chloroplastic OS=Arabidopsis thaliana GN=ADT3 PE=1 SV=1
	c53725_g1	22.1724	4.47069
	c58532_g3	22.1545	4.46953	P0CG89	Histone H4 OS=Glycine max PE=3 SV=1
	c60390_g4	22.1362	4.46834
	c80923_g1	22.1356	4.4683	P32068	Anthranilate synthase alpha subunit 1, chloroplastic OS=Arabidopsis thaliana GN=ASA1 PE=1 SV=1
	c56396_g1	22.1117	4.46674
	c16035_g1	22.0827	4.46484	O80434	Laccase-4 OS=Arabidopsis thaliana GN=IRX12 PE=2 SV=2
	c54173_g3	22.0827	4.46484	V7CA90	60S ribosome subunit biogenesis protein NIP7 homolog OS=Phaseolus vulgaris GN=PHAVU_003G104500g PE=3 SV=1
	c134377_g1	22.0827	4.46484	Q8S9G6	Taxadien-5-alpha-ol O-acetyltransferase OS=Taxus wallichiana var. chinensis PE=2 SV=1
	c20859_g1	22.0594	4.46332	Q9ASS6	Photosynthetic NDH subunit of lumenal location 5, chloroplastic OS=Arabidopsis thaliana GN=PNSL5 PE=1 SV=1
	c15950_g2	22.0405	4.46208
	c45201_g1	22.0381	4.46193	O22938	Leucine-rich repeat receptor-like tyrosine-protein kinase At2g41820 OS=Arabidopsis thaliana GN=At2g41820 PE=2 SV=1
	c33318_g1	22.0359	4.46178	Q9M0I2	Expansin-B3 OS=Arabidopsis thaliana GN=EXPB3 PE=2 SV=2
	c106275_g1	22.0307	4.46144	Q9FLX5	ABC transporter G family member 8 OS=Arabidopsis thaliana GN=ABCG8 PE=2 SV=1
	c47074_g1	21.9525	4.45631	Q9C977	Pentatricopeptide repeat-containing protein At1g80270, mitochondrial OS=Arabidopsis thaliana GN=At1g80270 PE=2 SV=1
	c1456_g1	21.9454	4.45585	P13089	Auxin-induced protein AUX28 OS=Glycine max GN=AUX28 PE=2 SV=1
	c56835_g1	21.9221	4.45431	Q94AP3	Protein WALLS ARE THIN 1 OS=Arabidopsis thaliana GN=WAT1 PE=1 SV=1
	c61727_g5	21.9221	4.45431	O82480	Rac-like GTP-binding protein ARAC7 OS=Arabidopsis thaliana GN=ARAC7 PE=1 SV=1
	c47830_g3	21.9221	4.45431
	c15457_g1	21.901	4.45292
	c33889_g1	21.901	4.45292	M1CGU0	Uncharacterized protein OS=Solanum tuberosum GN=PGSC0003DMG401026117 PE=4 SV=1
	c28925_g1	21.8097	4.4469
	c111320_g1	21.7833	4.44515	Q9SCV9	Beta-galactosidase 3 OS=Arabidopsis thaliana GN=BGAL3 PE=1 SV=1
	c51868_g3	21.7833	4.44515	Q75W16	Phospho-2-dehydro-3-deoxyheptonate aldolase 2, chloroplastic OS=Oryza sativa subsp. japonica GN=DAHPS2 PE=2 SV=1
	c13094_g1	21.7833	4.44515
	c43869_g2	21.7787	4.44484	Q8LJS2	Histone deacetylase HDT1 OS=Glycine max GN=HDT1 PE=2 SV=1
	c55460_g1	21.7599	4.4436	Q8H1F9	Pachytene checkpoint protein 2 homolog OS=Arabidopsis thaliana GN=At4g24710 PE=2 SV=1
	c39743_g1	21.746	4.44268	Q8LJS2	Histone deacetylase HDT1 OS=Glycine max GN=HDT1 PE=2 SV=1
	c57639_g1	21.7086	4.4402	P80074	Myb-related protein Pp1 (Fragment) OS=Physcomitrella patens subsp. patens GN=PP1 PE=2 SV=1
	c59293_g4	21.6851	4.43863	G7IHX8	DNA repair-like proteinRadA OS=Medicago truncatula GN=MTR_2g100640 PE=4 SV=2
	c61512_g6	21.6709	4.43769	Q6YU51	Probable 1-deoxy-D-xylulose-5-phosphate synthase 2, chloroplastic OS=Oryza sativa subsp. japonica GN=Os07g0190000 PE=2 SV=1
	c15736_g1	21.6559	4.43669	Q5I0E8	Kinesin-like protein KIF22 OS=Rattus norvegicus GN=Kif22 PE=2 SV=1
	c53142_g3	21.6295	4.43493	K4BW79	2-methylene-furan-3-one reductase OS=Solanum lycopersicum GN=EO PE=1 SV=1
	c25251_g1	21.6125	4.4338	Q9SKU6	Pentatricopeptide repeat-containing protein At2g20710, mitochondrial OS=Arabidopsis thaliana GN=At2g20710 PE=2 SV=1
	c55794_g1	21.577	4.43142	Q7XBH4	Myb-related protein Myb4 OS=Oryza sativa subsp. japonica GN=MYB4 PE=2 SV=2
	c55117_g3	21.5493	4.42957	Q9FJ45	GDSL esterase/lipase At5g45910 OS=Arabidopsis thaliana GN=At5g45910 PE=2 SV=1
	c16087_g1	21.4915	4.42569	Q9C7A2	Ankyrin repeat-containing protein At3g12360 OS=Arabidopsis thaliana GN=At3g12360 PE=2 SV=1
	c40559_g1	21.4915	4.42569
	c55629_g2	21.4303	4.42158
	c40014_g1	21.408	4.42008	Q93X17	Snakin-2 OS=Solanum tuberosum GN=SN2 PE=1 SV=1
	c52758_g1	21.347	4.41596
	c56393_g2	21.2816	4.41154	Q6AWT8	Guanine nucleotide-binding protein subunit gamma 3 OS=Arabidopsis thaliana GN=GG3 PE=2 SV=1
	c20921_g1	21.2816	4.41154	Q6NLH0	DNA-directed RNA polymerases II, IV and V subunit 9A OS=Arabidopsis thaliana GN=NRPB9A PE=1 SV=1
	c52378_g2	21.2808	4.41148	Q9STG6	Deoxyuridine 5'-triphosphate nucleotidohydrolase OS=Arabidopsis thaliana GN=DUT PE=1 SV=1
	c34916_g1	21.2617	4.41018	Q9FE06	Protein EXORDIUM-like 2 OS=Arabidopsis thaliana GN=EXL2 PE=2 SV=1
	c61918_g2	21.2453	4.40907
	c95353_g1	21.2395	4.40868
	c60378_g1	21.2395	4.40868	A0A0B2QIZ5	DnaJ like subfamily B member 12 OS=Glycine soja GN=glysoja_023752 PE=4 SV=1
	c27183_g1	21.2236	4.4076
	c59901_g1	21.1974	4.40581	Q9FF18	Cytokinin hydroxylase OS=Arabidopsis thaliana GN=CYP735A1 PE=1 SV=1
	c43024_g2	21.1895	4.40528
	c61728_g3	21.1895	4.40528
	c88013_g1	21.1895	4.40528
	c121999_g1	21.1895	4.40528
	c1587_g1	21.1895	4.40528
	c98326_g1	21.1895	4.40528
	c49958_g1	21.1895	4.40528
	c63375_g5	21.1895	4.40528
	c47830_g1	21.175	4.40429	Q9FNM7	DEAD-box ATP-dependent RNA helicase 26 OS=Arabidopsis thaliana GN=RH26 PE=1 SV=2
	c58462_g2	21.1717	4.40406	P68428	Histone H3.2 OS=Triticum aestivum PE=1 SV=2
	c24679_g1	21.1605	4.4033	Q17Q32	Enolase-phosphatase E1 OS=Aedes aegypti GN=AAEL000109 PE=3 SV=1
	c36692_g1	21.1245	4.40085
	c74721_g1	21.1189	4.40046	Q94IB1	Protein rough sheath 2 homolog OS=Oryza sativa subsp. japonica GN=RS2 PE=2 SV=1
	c123894_g1	21.0681	4.39699	Q5XF57	Probable receptor-like serine/threonine-protein kinase At5g57670 OS=Arabidopsis thaliana GN=At5g57670 PE=2 SV=1
	c78175_g1	21.06	4.39643	Q93ZM7	Chaperonin CPN60-like 2, mitochondrial OS=Arabidopsis thaliana GN=At3g13860 PE=2 SV=2
	c61848_g1	21.0477	4.39559
	c54316_g1	21.0477	4.39559	Q9M115	Protein S-acyltransferase 18 OS=Arabidopsis thaliana GN=PAT18 PE=2 SV=2
	c120759_g1	20.9393	4.38814	Q9FHA6	Protein RALF-like 34 OS=Arabidopsis thaliana GN=RALFL34 PE=2 SV=1
	c31237_g1	20.8881	4.38461	O80327	Thaumatin-like protein 1 OS=Pyrus pyrifolia GN=TL1 PE=1 SV=1
	c121207_g1	20.8758	4.38376	Q38867	Peptidyl-prolyl cis-trans isomerase CYP19-3 OS=Arabidopsis thaliana GN=CYP19-3 PE=2 SV=2
	c121105_g1	20.865	4.38302	Q9LIS1	Protein ECERIFERUM 26-like OS=Arabidopsis thaliana GN=CER26L PE=2 SV=1
	c53751_g2	20.8546	4.3823	G9JJS5	Galactose oxidase OS=Ziziphus jujuba PE=2 SV=1
	c37150_g1	20.8427	4.38147	Q1JPL7	Pectinesterase/pectinesterase inhibitor 18 OS=Arabidopsis thaliana GN=PME18 PE=1 SV=3
	c20902_g1	20.8393	4.38124	F6M8H5	Probable sesquiterpene synthase OS=Santalum austrocaledonicum GN=SesquiTPS PE=3 SV=1
	c108636_g1	20.8162	4.37964	Q9LPR4	2-isopropylmalate synthase 1, chloroplastic OS=Arabidopsis thaliana GN=IPMS1 PE=1 SV=2
	c62977_g5	20.8152	4.37956	Q84WS0	Subtilisin-like protease SBT1.1 OS=Arabidopsis thaliana GN=SBTI1.1 PE=1 SV=1
	c32383_g1	20.8152	4.37956
	c61811_g2	20.8064	4.37896	Q9FWX2	NAC domain-containing protein 7 OS=Arabidopsis thaliana GN=NAC007 PE=2 SV=2
	c40587_g1	20.7813	4.37721	Q8LJS2	Histone deacetylase HDT1 OS=Glycine max GN=HDT1 PE=2 SV=1
	c56730_g2	20.7485	4.37494	A0A151SJX7	ATPase family AAA domain-containing protein 5 OS=Cajanus cajan GN=KK1_001360 PE=4 SV=1
	c42841_g1	20.7443	4.37464	O48653	DNA polymerase alpha catalytic subunit OS=Oryza sativa subsp. japonica GN=Os01g0868300 PE=2 SV=2
	c50416_g2	20.731	4.37372	B9RE57	Kinesin-like protein OS=Ricinus communis GN=RCOM_1618460 PE=3 SV=1
	c81688_g1	20.7098	4.37224	P92982	Probable polygalacturonase non-catalytic subunit JP630 OS=Arabidopsis thaliana GN=JP630 PE=2 SV=2
	c37144_g1	20.7043	4.37186	A0A061EDJ2	Transducin/WD40 repeat-like superfamily protein OS=Theobroma cacao GN=TCM_016954 PE=4 SV=1
	c50789_g1	20.6511	4.36815	Q9C7N4	GDSL esterase/lipase At1g29670 OS=Arabidopsis thaliana GN=At1g29670 PE=2 SV=1
	c56921_g4	20.6412	4.36745
	c57733_g2	20.6412	4.36745
	c54192_g2	20.6412	4.36745	P17772	Organ-specific protein S2 OS=Pisum sativum PE=2 SV=1
	c54669_g3	20.5957	4.36427	Q9LW60	Putative protein phosphatase 2C-like protein 44 OS=Arabidopsis thaliana GN=At3g23360 PE=5 SV=1
	c92724_g1	20.5957	4.36427	Q9LZL3	Aspartic proteinase PCS1 OS=Arabidopsis thaliana GN=PCS1 PE=2 SV=1
	c38988_g1	20.5957	4.36427	P0C2F6	Putative ribonuclease H protein At1g65750 OS=Arabidopsis thaliana GN=At1g65750 PE=3 SV=1
	c24879_g1	20.5957	4.36427	Q9SJH0	Transcription factor PAR1 OS=Arabidopsis thaliana GN=PAR1 PE=1 SV=1
	c57736_g2	20.5521	4.36122	Q8L4D8	Protein IQ-DOMAIN 31 OS=Arabidopsis thaliana GN=IQD31 PE=1 SV=1
	c138984_g1	20.5437	4.36063	Q7Q732	Dehydrogenase/reductase SDR family protein 7-like OS=Anopheles gambiae GN=AGAP005532 PE=3 SV=3
	c60822_g2	20.4733	4.35567	Q6WUC1	(RS)-norcoclaurine 6-O-methyltransferase OS=Papaver somniferum GN=PSOMT2 PE=1 SV=1
	c59018_g2	20.4646	4.35506	O50046	Tryptophan synthase beta chain 2, chloroplastic OS=Camptotheca acuminata GN=TSB PE=2 SV=1
	c56234_g1	20.4277	4.35245	Q3E9B4	Transcription repressor OFP8 OS=Arabidopsis thaliana GN=OFP8 PE=2 SV=1
	c49735_g1	20.3908	4.34985	A5JTQ2	Beta-xylosidase/alpha-L-arabinofuranosidase 1 (Fragment) OS=Medicago sativa subsp. varia GN=Xyl1 PE=1 SV=1
	c111255_g1	20.3738	4.34864	Q9SGE2	Cyclin-dependent protein kinase inhibitor SMR2 OS=Arabidopsis thaliana GN=SMR2 PE=1 SV=1
	c60447_g4	20.3738	4.34864
	c78516_g1	20.3119	4.34426	Q9LEY9	H/ACA ribonucleoprotein complex subunit 2-like protein OS=Arabidopsis thaliana GN=At5g08180 PE=1 SV=1
	c46421_g4	20.2997	4.34339	W9RJM4	Upstream activation factor subunit spp27 OS=Morus notabilis GN=L484_011505 PE=4 SV=1
	c49629_g3	20.2308	4.33848
	c50342_g1	20.2195	4.33767	Q766C3	Aspartic proteinase nepenthesin-1 OS=Nepenthes gracilis GN=nep1 PE=1 SV=1
	c51232_g1	20.2142	4.3373	O81098	DNA-directed RNA polymerases II and IV subunit 5A OS=Arabidopsis thaliana GN=NRPB5A PE=1 SV=1
	c59304_g3	20.2142	4.3373	Q9FMH5	Putative cyclin-A3-1 OS=Arabidopsis thaliana GN=CYCA3-1 PE=3 SV=1
	c79932_g1	20.2142	4.3373	Q58FS3	Transcription factor RADIALIS OS=Antirrhinum majus GN=RAD PE=1 SV=1
	c62283_g1	20.1328	4.33147	F4I2H7	Protein TPX2 OS=Arabidopsis thaliana GN=TPX2 PE=1 SV=1
	c61261_g4	20.1306	4.33131	Q94C70	Nucleobase-ascorbate transporter 2 OS=Arabidopsis thaliana GN=NAT2 PE=2 SV=2
	c53110_g1	20.1155	4.33024	Q9FKM7	Auxin-responsive protein IAA33 OS=Arabidopsis thaliana GN=IAA33 PE=2 SV=1
	c57798_g1	20.0483	4.3254
	c136739_g1	20.0019	4.32206
	c61290_g1	20.0019	4.32206	P49730	Ribonucleoside-diphosphate reductase small chain OS=Nicotiana tabacum PE=2 SV=1
	c63719_g5	20.0012	4.32201	P92519	Uncharacterized mitochondrial protein AtMg00810 OS=Arabidopsis thaliana GN=AtMg00810 PE=4 SV=1
	c13838_g1	20.0009	4.32199	Q9LRT1	Probably inactive leucine-rich repeat receptor-like protein kinase At3g28040 OS=Arabidopsis thaliana GN=At3g28040 PE=2 SV=1
	c46015_g2	20.0009	4.32199	Q9SF32	Protein IQ-DOMAIN 1 OS=Arabidopsis thaliana GN=IQD1 PE=1 SV=1
	c94804_g1	20.0004	4.32196
	c109270_g1	19.954	4.31861	P0CG89	Histone H4 OS=Glycine max PE=3 SV=1
	c62540_g4	19.9327	4.31707
	c20355_g1	19.9067	4.31518	P12628	NADP-dependent malic enzyme OS=Phaseolus vulgaris GN=ME1 PE=1 SV=1
	c139095_g1	19.9067	4.31518
	c29193_g1	19.9054	4.31509
	c108082_g1	19.8852	4.31362	A0A151UBW0	Kinetochore protein nuf2 OS=Cajanus cajan GN=KK1_021062 PE=4 SV=1
	c35943_g1	19.8607	4.31184	Q0WVD6	Probable protein arginine N-methyltransferase 3 OS=Arabidopsis thaliana GN=PRMT3 PE=2 SV=1
	c60473_g2	19.8509	4.31113
	c48726_g3	19.8509	4.31113
	c62274_g6	19.8509	4.31113	Q9S7X6	Thermospermine synthase ACAULIS5 OS=Arabidopsis thaliana GN=ACL5 PE=1 SV=1
	c54785_g1	19.8509	4.31113	P08452	Uncharacterized lipoprotein syc1174_c OS=Synechococcus sp. (strain ATCC 27144 / PCC 6301 / SAUG 1402/1) GN=syc1174_c PE=3 SV=2
	c38481_g1	19.7872	4.30649
	c121850_g1	19.774	4.30553	Q682S0	Root phototropism protein 2 OS=Arabidopsis thaliana GN=RPT2 PE=1 SV=2
	c12413_g1	19.7701	4.30525	P27527	Ribosomal protein S19, mitochondrial OS=Petunia hybrida GN=RPS19 PE=2 SV=2
	c34864_g1	19.7294	4.30228	P37118	Cytochrome P450 71A2 OS=Solanum melongena GN=CYP71A2 PE=2 SV=1
	c35665_g2	19.6916	4.29951
	c43521_g1	19.6541	4.29676	C0LGS2	Probable LRR receptor-like serine/threonine-protein kinase At4g36180 OS=Arabidopsis thaliana GN=At4g36180 PE=2 SV=1
	c46421_g1	19.6355	4.29539
	c40245_g1	19.6286	4.29489	Q9XG99	Ribose-phosphate pyrophosphokinase 2, chloroplastic OS=Spinacia oleracea GN=PRS2 PE=2 SV=1
	c108120_g1	19.61	4.29352	Q9LEY9	H/ACA ribonucleoprotein complex subunit 2-like protein OS=Arabidopsis thaliana GN=At5g08180 PE=1 SV=1
	c56083_g2	19.5737	4.29084	Q8S9M3	Growth-regulating factor 9 OS=Arabidopsis thaliana GN=GRF9 PE=1 SV=1
	c61950_g5	19.5511	4.28917	P37392	Tubulin beta-1 chain OS=Lupinus albus GN=TUBB1 PE=3 SV=1
	c61124_g1	19.4799	4.28391
	c66660_g1	19.4682	4.28304
	c58976_g1	19.4583	4.28231	Q93W32	Fasciclin-like arabinogalactan protein 18 OS=Arabidopsis thaliana GN=FLA18 PE=2 SV=1
	c50317_g2	19.458	4.28229	A2XLF4	Zinc-finger homeodomain protein 11 OS=Oryza sativa subsp. indica GN=ZHD11 PE=3 SV=1
	c137064_g1	19.4489	4.28161	O80786	DNA replication licensing factor MCM5 OS=Arabidopsis thaliana GN=MCM5 PE=1 SV=1
	c13219_g1	19.4081	4.27859	Q6NMK1	Glucuronoxylan 4-O-methyltransferase 1 OS=Arabidopsis thaliana GN=GXM1 PE=1 SV=1
	c39307_g1	19.4081	4.27859	Q9LDD8	Methylcrotonoyl-CoA carboxylase beta chain, mitochondrial OS=Arabidopsis thaliana GN=MCCB PE=2 SV=1
	c37596_g1	19.4081	4.27859
	c49878_g1	19.4081	4.27859
	c63649_g1	19.4081	4.27859
	c43684_g2	19.4081	4.27859	Q9SUR9	Protein SGT1 homolog A OS=Arabidopsis thaliana GN=SGT1A PE=1 SV=1
	c21874_g1	19.4081	4.27859	Q94HF1	Eukaryotic translation initiation factor 3 subunit K OS=Oryza sativa subsp. japonica GN=TIF3K1 PE=2 SV=1
	c47883_g2	19.4081	4.27859	Q39693	Beta-fructofuranosidase, insoluble isoenzyme 3 OS=Daucus carota GN=INV3 PE=3 SV=1
	c57584_g1	19.4081	4.27859
	c62139_g6	19.402	4.27814	O81301	Probable pectinesterase/pectinesterase inhibitor 40 OS=Arabidopsis thaliana GN=PME40 PE=2 SV=1
	c8625_g1	19.365	4.27538	Q00451	36.4 kDa proline-rich protein OS=Solanum lycopersicum GN=TPRP-F1 PE=2 SV=1
	c49253_g1	19.3602	4.27502	Q940Q4	RING-H2 finger protein ATL13 OS=Arabidopsis thaliana GN=ATL13 PE=2 SV=2
	c54107_g2	19.2968	4.27029	Q9SZN7	Heavy metal-associated isoprenylated plant protein 26 OS=Arabidopsis thaliana GN=HIPP26 PE=1 SV=1
	c66624_g1	19.256	4.26724
	c92673_g1	19.256	4.26724
	c49629_g2	19.2401	4.26604	Q00451	36.4 kDa proline-rich protein OS=Solanum lycopersicum GN=TPRP-F1 PE=2 SV=1
	c62273_g2	19.1916	4.2624	V7B5W5	Uncharacterized protein OS=Phaseolus vulgaris GN=PHAVU_008G174100g PE=4 SV=1
	c89555_g1	19.1865	4.26202	Q84RL7	Aquaporin PIP2-1 OS=Zea mays GN=PIP2-1 PE=1 SV=2
	c59599_g2	19.1865	4.26202	Q93Z00	Transcription factor TCP14 OS=Arabidopsis thaliana GN=TCP14 PE=1 SV=1
	c55641_g3	19.1579	4.25987	O48766	Endoglucanase 11 OS=Arabidopsis thaliana GN=At2g32990 PE=2 SV=1
	c64176_g1	19.152	4.25942	Q9SU79	Probable polyamine oxidase 5 OS=Arabidopsis thaliana GN=PAO5 PE=2 SV=1
	c28998_g2	19.1467	4.25903
	c48184_g1	19.1467	4.25903	Q38961	DNA cross-link repair protein SNM1 OS=Arabidopsis thaliana GN=SNM1 PE=2 SV=1
	c45835_g1	19.1233	4.25726	M7ZBQ3	Uncharacterized protein OS=Triticum urartu GN=TRIUR3_33952 PE=4 SV=1
	c12228_g1	19.1209	4.25708
	c57704_g3	19.1028	4.25571
	c62500_g8	19.0791	4.25392
	c49751_g3	19.0303	4.25023	P0CG89	Histone H4 OS=Glycine max PE=3 SV=1
	c60407_g1	19.0258	4.24988	Q8W453	Putative lipid-transfer protein DIR1 OS=Arabidopsis thaliana GN=DIR1 PE=1 SV=1
	c24283_g2	18.964	4.24519	Q9LHE3	Protein ASPARTIC PROTEASE IN GUARD CELL 2 OS=Arabidopsis thaliana GN=ASPG2 PE=2 SV=1
	c11920_g2	18.9635	4.24515	Q9FG87	3-ketoacyl-CoA synthase 19 OS=Arabidopsis thaliana GN=KCS19 PE=2 SV=1
	c40890_g2	18.9332	4.24285	Q8LC68	NAP1-related protein 2 OS=Arabidopsis thaliana GN=NRP2 PE=1 SV=2
	c16146_g1	18.9157	4.24152	Q9S728	Protodermal factor 1 OS=Arabidopsis thaliana GN=PDF1 PE=2 SV=1
	c51017_g1	18.8835	4.23905	Q9FWA6	Pentatricopeptide repeat-containing protein At3g02330 OS=Arabidopsis thaliana GN=PCMP-E90 PE=2 SV=2
	c41692_g2	18.8835	4.23905	Q6AWY4	Growth-regulating factor 5 OS=Oryza sativa subsp. japonica GN=GRF5 PE=2 SV=1
	c47686_g1	18.8835	4.23905	Q00451	36.4 kDa proline-rich protein OS=Solanum lycopersicum GN=TPRP-F1 PE=2 SV=1
	c28755_g1	18.8562	4.23697	Q9FL33	DNA replication licensing factor MCM3 OS=Arabidopsis thaliana GN=MCM3 PE=1 SV=1
	c49372_g2	18.8143	4.23376	Q94KD8	Probable beta-D-xylosidase 2 OS=Arabidopsis thaliana GN=BXL2 PE=2 SV=1
	c41571_g1	18.8143	4.23376	Q9SD39	Probable methyltransferase PMT27 OS=Arabidopsis thaliana GN=At3g51070 PE=3 SV=1
	c47822_g2	18.8143	4.23376
	c58186_g2	18.7566	4.22933	Q8LB81	GDSL esterase/lipase At5g33370 OS=Arabidopsis thaliana GN=At5g33370 PE=2 SV=1
	c14506_g1	18.6793	4.22337	Q9M903	Protein TRIGALACTOSYLDIACYLGLYCEROL 4, chloroplastic OS=Arabidopsis thaliana GN=TGD4 PE=1 SV=1
	c92846_g1	18.6656	4.22231	P22895	P34 probable thiol protease OS=Glycine max PE=1 SV=1
	c46503_g1	18.6437	4.22061	Q9M160	Uncharacterized protein At4g00950 OS=Arabidopsis thaliana GN=At4g00950 PE=2 SV=1
	c61811_g1	18.643	4.22056	O48711	Probable pectinesterase/pectinesterase inhibitor 12 OS=Arabidopsis thaliana GN=PME12 PE=2 SV=1
	c54125_g2	18.6413	4.22043	Q949Z1	Polygalacturonase At1g48100 OS=Arabidopsis thaliana GN=At1g48100 PE=2 SV=1
	c63644_g1	18.5811	4.21576	Q6NQL6	Lipid phosphate phosphatase epsilon 2, chloroplastic OS=Arabidopsis thaliana GN=LPPE2 PE=1 SV=1
	c58178_g1	18.5808	4.21574	Q949U7	Peroxiredoxin-2E, chloroplastic OS=Arabidopsis thaliana GN=PRXIIE PE=1 SV=2
	c24472_g1	18.5109	4.2103	O82255	Glutaredoxin-C13 OS=Arabidopsis thaliana GN=GRXC13 PE=3 SV=1
	c51911_g2	18.5109	4.2103	Q02921	Early nodulin-93 OS=Glycine max PE=2 SV=1
	c61607_g1	18.5109	4.2103	Q9SCV9	Beta-galactosidase 3 OS=Arabidopsis thaliana GN=BGAL3 PE=1 SV=1
	c68021_g1	18.5109	4.2103
	c21524_g1	18.5062	4.20994
	c108799_g1	18.5062	4.20994
	c51906_g1	18.5062	4.20994	F8WKW1	7-deoxyloganetin glucosyltransferase OS=Gardenia jasminoides GN=UGT85A24 PE=1 SV=1
	c19086_g1	18.4881	4.20853
	c121640_g1	18.4172	4.20298	Q2R1M8	DEAD-box ATP-dependent RNA helicase 52C OS=Oryza sativa subsp. japonica GN=Os11g0599500 PE=3 SV=1
	c106392_g1	18.408	4.20226	Q9M5X8	Non-specific lipid-transfer protein OS=Prunus avium PE=1 SV=1
	c53561_g2	18.3722	4.19945	O64705	Pentatricopeptide repeat-containing protein At2g34400 OS=Arabidopsis thaliana GN=PCMP-E23 PE=3 SV=2
	c107925_g1	18.3722	4.19945
	c135103_g1	18.3722	4.19945
	c28886_g1	18.3688	4.19918	Q9SP37	Adenosylhomocysteinase OS=Lupinus luteus GN=SAHH PE=1 SV=1
	c95461_g1	18.3584	4.19837	Q96520	Peroxidase 12 OS=Arabidopsis thaliana GN=PER12 PE=1 SV=1
	c63653_g9	18.3548	4.19808	P10978	Retrovirus-related Pol polyprotein from transposon TNT 1-94 OS=Nicotiana tabacum PE=2 SV=1
	c53452_g2	18.3302	4.19615	G7I3F7	Enoyl-(Acyl carrier) reductase OS=Medicago truncatula GN=MTR_1g007800 PE=4 SV=1
	c12840_g1	18.2977	4.19359	Q9M153	GDSL esterase/lipase At4g01130 OS=Arabidopsis thaliana GN=At4g01130 PE=2 SV=1
	c62977_g8	18.2928	4.1932	O65351	Subtilisin-like protease SBT1.7 OS=Arabidopsis thaliana GN=SBT1.7 PE=1 SV=1
	c49118_g1	18.2928	4.1932	Q7Y1B6	DELLA protein GAI OS=Solanum lycopersicum GN=GAI PE=2 SV=1
	c139307_g1	18.2597	4.19059	B9LJG2	50S ribosomal protein L13 OS=Chloroflexus aurantiacus (strain ATCC 29364 / DSM 637 / Y-400-fl) GN=rplM PE=3 SV=1
	c50439_g3	18.2449	4.18942
	c61359_g1	18.2412	4.18913	F4JRP8	Protein STICHEL-like 2 OS=Arabidopsis thaliana GN=At4g24790 PE=2 SV=1
	c31949_g1	18.2412	4.18913
	c135082_g1	18.2205	4.18749	Q0WPE9	Nucleobase-ascorbate transporter 7 OS=Arabidopsis thaliana GN=NAT7 PE=2 SV=2
	c62074_g3	18.2205	4.18749
	c55894_g2	18.2205	4.18749	Q7XBH4	Myb-related protein Myb4 OS=Oryza sativa subsp. japonica GN=MYB4 PE=2 SV=2
	c54651_g2	18.2205	4.18749	O80624	Probable membrane-associated kinase regulator 4 OS=Arabidopsis thaliana GN=MAKR4 PE=3 SV=1
	c53687_g3	18.2205	4.18749
	c48465_g3	18.2205	4.18749
	c2458_g1	18.2205	4.18749	A0A0B2QA61	Putative WD repeat-containing protein OS=Glycine soja GN=glysoja_006904 PE=4 SV=1
	c59400_g2	18.1785	4.18416	Q9LRT1	Probably inactive leucine-rich repeat receptor-like protein kinase At3g28040 OS=Arabidopsis thaliana GN=At3g28040 PE=2 SV=1
	c36487_g1	18.1713	4.18359	Q8LEJ6	Fasciclin-like arabinogalactan protein 11 OS=Arabidopsis thaliana GN=FLA11 PE=2 SV=2
	c50303_g1	18.1416	4.18123
	c63831_g6	18.1383	4.18097	P10978	Retrovirus-related Pol polyprotein from transposon TNT 1-94 OS=Nicotiana tabacum PE=2 SV=1
	c39845_g1	18.1383	4.18097	Q9FIQ5	Protein TORNADO 2 OS=Arabidopsis thaliana GN=TRN2 PE=1 SV=1
	c35842_g1	18.1383	4.18097	A0A0V0I9I8	Putative ovule protein OS=Solanum chacoense PE=4 SV=1
	c57520_g2	18.1383	4.18097	Q9SY02	Pentatricopeptide repeat-containing protein At4g02750 OS=Arabidopsis thaliana GN=PCMP-H24 PE=3 SV=1
	c40860_g1	18.1383	4.18097
	c58392_g1	18.1383	4.18097	B9G9L9	BURP domain-containing protein 17 OS=Oryza sativa subsp. japonica GN=BURP17 PE=2 SV=1
	c38053_g1	18.1008	4.17798	Q8L7Y8	Kinesin-like protein KIN12B OS=Arabidopsis thaliana GN=KIN12B PE=1 SV=1
	c79744_g1	18.0793	4.17626
	c31358_g1	18.0793	4.17626	Q9FJU9	Glucan endo-1,3-beta-glucosidase 13 OS=Arabidopsis thaliana GN=At5g56590 PE=1 SV=1
	c21758_g1	18.0726	4.17573	Q8LFN2	Probable inactive leucine-rich repeat receptor-like protein kinase At3g03770 OS=Arabidopsis thaliana GN=At3g03770 PE=2 SV=1
	c52910_g1	18.0653	4.17515
	c3800_g1	18.0086	4.17061
	c51028_g1	17.9663	4.16723	P36183	Endoplasmin homolog OS=Hordeum vulgare PE=2 SV=1
	c71321_g1	17.9276	4.16411
	c88327_g1	17.9182	4.16335	Q9ZSK5	Zeatin O-glucosyltransferase OS=Phaseolus lunatus GN=ZOG1 PE=2 SV=1
	c143473_g1	17.9059	4.16237
	c9873_g1	17.8324	4.15643	Q8RVH5	Basic 7S globulin 2 OS=Glycine max PE=1 SV=1
	c33472_g1	17.8293	4.15618	Q8RXD4	Protein BREAST CANCER SUSCEPTIBILITY 1 homolog OS=Arabidopsis thaliana GN=BRCA1 PE=2 SV=1
	c59978_g3	17.8058	4.15427	Q9ZQ19	Replication protein A 32 kDa subunit A OS=Arabidopsis thaliana GN=RPA2A PE=1 SV=2
	c80550_g1	17.7658	4.15103	Q9LS22	Aluminum-activated malate transporter 14 OS=Arabidopsis thaliana GN=ALMT14 PE=2 SV=1
	c51476_g1	17.7561	4.15025	Q9C5Y4	Structural maintenance of chromosomes protein 2-1 OS=Arabidopsis thaliana GN=SMC2-1 PE=2 SV=2
	c31151_g1	17.7286	4.148
	c57968_g2	17.6649	4.14281	Q00624	L-ascorbate oxidase homolog OS=Brassica napus GN=Bp10 PE=2 SV=1
	c57620_g1	17.636	4.14045	Q9SCU1	Patellin-6 OS=Arabidopsis thaliana GN=PATL6 PE=2 SV=1
	c123578_g1	17.6303	4.13999	Q8VYZ0	E3 ubiquitin-protein ligase ORTHRUS 2 OS=Arabidopsis thaliana GN=ORTH2 PE=1 SV=1
	c59548_g1	17.6267	4.13969
	c31889_g1	17.6267	4.13969
	c46255_g1	17.6267	4.13969
	c50537_g4	17.6267	4.13969	F4K295	Rop guanine nucleotide exchange factor 5 OS=Arabidopsis thaliana GN=ROPGEF5 PE=2 SV=1
	c59600_g3	17.6267	4.13969	Q9MA15	Uncharacterized aarF domain-containing protein kinase At1g79600, chloroplastic OS=Arabidopsis thaliana GN=At1g79600 PE=2 SV=1
	c8867_g1	17.6267	4.13969	B5X582	Twinkle homolog protein, chloroplastic/mitochondrial OS=Arabidopsis thaliana GN=At1g30680 PE=1 SV=1
	c110883_g1	17.6267	4.13969	O48928	Cytochrome P450 77A3 OS=Glycine max GN=CYP77A3 PE=2 SV=1
	c64148_g1	17.6267	4.13969
	c9484_g1	17.6136	4.13862	Q94C77	Receptor protein kinase-like protein At4g34220 OS=Arabidopsis thaliana GN=At4g34220 PE=2 SV=1
	c15968_g2	17.6124	4.13852	Q9LEY1	Serine carboxypeptidase-like 35 OS=Arabidopsis thaliana GN=SCPL35 PE=2 SV=1
	c60237_g3	17.5821	4.13604	Q9SF32	Protein IQ-DOMAIN 1 OS=Arabidopsis thaliana GN=IQD1 PE=1 SV=1
	c61356_g2	17.5799	4.13586	O23826	125 kDa kinesin-related protein OS=Nicotiana tabacum GN=TKRP125 PE=1 SV=1
	c54739_g1	17.5579	4.13405	Q9FGR2	Pentatricopeptide repeat-containing protein At5g59600 OS=Arabidopsis thaliana GN=PCMP-E1 PE=2 SV=1
	c54192_g1	17.5579	4.13405	P17772	Organ-specific protein S2 OS=Pisum sativum PE=2 SV=1
	c56212_g2	17.4884	4.12833	O82089	Copper transport protein CCH OS=Arabidopsis thaliana GN=CCH PE=1 SV=1
	c21998_g1	17.4571	4.12574	Q41249	Protochlorophyllide reductase, chloroplastic OS=Cucumis sativus GN=PORA PE=2 SV=1
	c57174_g2	17.4229	4.12291	Q00332	40S ribosomal protein S15a OS=Brassica napus GN=RPS15A PE=2 SV=3
	c102348_g1	17.4229	4.12291	Q9SE94	Methylenetetrahydrofolate reductase 1 OS=Zea mays PE=1 SV=1
	c106960_g1	17.4145	4.12222	Q9SAJ3	ATP-dependent zinc metalloprotease FTSH 12, chloroplastic OS=Arabidopsis thaliana GN=FTSH12 PE=2 SV=2
	c61950_g12	17.3932	4.12045	Q8H7U1	Tubulin beta-2 chain OS=Oryza sativa subsp. japonica GN=TUBB2 PE=2 SV=1
	c93231_g1	17.3796	4.11932	Q9STK5	Pentatricopeptide repeat-containing protein At3g48250, chloroplastic OS=Arabidopsis thaliana GN=At3g48250 PE=2 SV=1
	c59670_g2	17.3155	4.11399	Q9SZN7	Heavy metal-associated isoprenylated plant protein 26 OS=Arabidopsis thaliana GN=HIPP26 PE=1 SV=1
	c55750_g2	17.2865	4.11157	Q9LQM2	RING-H2 finger protein ATL81 OS=Arabidopsis thaliana GN=ATL81 PE=2 SV=1
	c50255_g1	17.286	4.11153	Q66GM8	Pectin acetylesterase 10 OS=Arabidopsis thaliana GN=PAE10 PE=2 SV=1
	c55547_g1	17.2859	4.11152	O22806	Mitotic spindle checkpoint protein BUBR1 OS=Arabidopsis thaliana GN=BUBR1 PE=1 SV=2
	c6638_g1	17.2858	4.11152	W9QJ71	p21-activated protein kinase-interacting protein 1-like protein OS=Morus notabilis GN=L484_005902 PE=4 SV=1
	c28978_g1	17.2786	4.11092	I1JFV5	Uncharacterized protein OS=Glycine max GN=GLYMA_02G168900 PE=4 SV=2
	c61335_g1	17.2706	4.11024	A0A0B2P1T9	Putative methyltransferase TARBP1 OS=Glycine soja GN=glysoja_012939 PE=4 SV=1
	c94891_g1	17.2675	4.10999	Q8LF80	Cyclin-dependent kinase B2-1 OS=Arabidopsis thaliana GN=CDKB2-1 PE=1 SV=2
	c52164_g1	17.2402	4.1077	O23628	Histone H2A variant 1 OS=Arabidopsis thaliana GN=H2AV PE=1 SV=1
	c130782_g1	17.1973	4.10411	Q9FIG7	Dirigent protein 2 OS=Arabidopsis thaliana GN=DIR2 PE=2 SV=1
	c61727_g3	17.1857	4.10313	O82480	Rac-like GTP-binding protein ARAC7 OS=Arabidopsis thaliana GN=ARAC7 PE=1 SV=1
	c60947_g5	17.1857	4.10313	O48780	3-ketoacyl-CoA synthase 11 OS=Arabidopsis thaliana GN=KCS11 PE=2 SV=1
	c45684_g1	17.1317	4.0986	Q41916	Cysteine proteinase inhibitor 5 OS=Arabidopsis thaliana GN=CYS5 PE=2 SV=2
	c93363_g1	17.1216	4.09775	P93149	Licodione synthase OS=Glycyrrhiza echinata GN=CYP93B1 PE=1 SV=2
	c60386_g1	17.1029	4.09617	F4HPR5	Dynamin-related protein 5A OS=Arabidopsis thaliana GN=DRP5A PE=2 SV=1
	c107473_g1	17.0593	4.09248
	c62328_g5	17.0206	4.08921	Q3ECB8	Pentatricopeptide repeat-containing protein At1g77170 OS=Arabidopsis thaliana GN=PCMP-E21 PE=2 SV=1
	c49323_g1	17.0206	4.08921
	c83585_g1	17.0206	4.08921
	c6531_g1	17.0206	4.08921
	c141882_g1	17.0206	4.08921
	c62886_g4	17.015	4.08874	Q9ZTX9	Auxin response factor 4 OS=Arabidopsis thaliana GN=ARF4 PE=1 SV=1
	c11804_g1	17.0118	4.08846
	c60267_g1	17.0057	4.08795	Q8LFN2	Probable inactive leucine-rich repeat receptor-like protein kinase At3g03770 OS=Arabidopsis thaliana GN=At3g03770 PE=2 SV=1
	c47746_g1	17.0052	4.0879	J9U5U9	Probable strigolactone esterase DAD2 OS=Petunia hybrida GN=DAD2 PE=1 SV=1
	c60959_g4	17.003	4.08771	O65399	Glucan endo-1,3-beta-glucosidase 1 OS=Arabidopsis thaliana GN=At1g11820 PE=1 SV=3
	c773_g1	17.0016	4.0876
	c62624_g4	16.9735	4.08521
	c37714_g1	16.9179	4.08048	D7TVE8	DNA primase OS=Vitis vinifera GN=VIT_02s0025g01350 PE=3 SV=1
	c60858_g2	16.9024	4.07916	Q9C9N5	Probable inactive leucine-rich repeat receptor-like protein kinase At1g66830 OS=Arabidopsis thaliana GN=At1g66830 PE=2 SV=1
	c134360_g1	16.8829	4.07749	Q7XKU5	2-oxoglutarate-dependent dioxygenase DAO OS=Oryza sativa subsp. japonica GN=DAO PE=2 SV=2
	c58487_g1	16.8587	4.07542	Q9SZN7	Heavy metal-associated isoprenylated plant protein 26 OS=Arabidopsis thaliana GN=HIPP26 PE=1 SV=1
	c19931_g1	16.8467	4.07439
	c55727_g1	16.8364	4.07351	Q9LP24	Probable leucine-rich repeat receptor-like protein kinase At1g35710 OS=Arabidopsis thaliana GN=At1g35710 PE=2 SV=1
	c54102_g4	16.7995	4.07034	Q949G3	Pleiotropic drug resistance protein 1 OS=Nicotiana plumbaginifolia GN=PDR1 PE=1 SV=1
	c63057_g2	16.7983	4.07024
	c86255_g1	16.7983	4.07024	G7IGY3	Ribosomal protein L1p/L10e family protein OS=Medicago truncatula GN=MTR_2g064460 PE=4 SV=1
	c136874_g1	16.7983	4.07024	Q9M209	Protein ECERIFERUM 7 OS=Arabidopsis thaliana GN=CER7 PE=2 SV=1
	c24175_g1	16.7589	4.06685	Q2V6J9	UDP-glucose flavonoid 3-O-glucosyltransferase 7 OS=Fragaria ananassa GN=GT7 PE=1 SV=1
	c47043_g1	16.748	4.06591	Q94AH9	Mediator of RNA polymerase II transcription subunit 36a OS=Arabidopsis thaliana GN=MED36A PE=1 SV=2
	c28287_g1	16.7436	4.06554	V7CEC2	Uncharacterized protein OS=Phaseolus vulgaris GN=PHAVU_003G296300g PE=4 SV=1
	c47830_g2	16.7436	4.06554
	c19907_g1	16.7436	4.06554	Q9LPM8	Putative branched-chain-amino-acid aminotransferase 7 OS=Arabidopsis thaliana GN=BCAT7 PE=5 SV=1
	c38710_g3	16.7244	4.06388	Q9M9C5	Probable leucine-rich repeat receptor-like protein kinase At1g68400 OS=Arabidopsis thaliana GN=At1g68400 PE=2 SV=1
	c56982_g1	16.7213	4.06362
	c61132_g2	16.7204	4.06354	Q9SSK5	MLP-like protein 43 OS=Arabidopsis thaliana GN=MLP43 PE=1 SV=1
	c51302_g1	16.6959	4.06142
	c56572_g1	16.6959	4.06142
	c101993_g1	16.6609	4.0584	O82392	Phosphomethylpyrimidine synthase, chloroplastic OS=Arabidopsis thaliana GN=THIC PE=1 SV=1
	c134759_g1	16.6579	4.05813
	c55026_g1	16.648	4.05728
	c60347_g5	16.648	4.05728	I1M5R2	Uncharacterized protein OS=Glycine max GN=GLYMA_13G363000 PE=4 SV=1
	c46764_g2	16.648	4.05728	P52901	Pyruvate dehydrogenase E1 component subunit alpha-1, mitochondrial OS=Arabidopsis thaliana GN=E1 ALPHA PE=1 SV=2
	c48609_g1	16.648	4.05728	Q93ZQ3	Probable inactive patatin-like protein 9 OS=Arabidopsis thaliana GN=PLP9 PE=2 SV=1
	c106659_g1	16.6479	4.05727	Q94CH6	GDSL esterase/lipase EXL3 OS=Arabidopsis thaliana GN=EXL3 PE=2 SV=1
	c60237_g2	16.6472	4.05721	Q9SF32	Protein IQ-DOMAIN 1 OS=Arabidopsis thaliana GN=IQD1 PE=1 SV=1
	c47667_g1	16.6372	4.05634	Q2HU65	Probable histone H2A.2 OS=Medicago truncatula GN=MtrDRAFT_AC149210g4v1 PE=3 SV=1
	c52062_g2	16.6159	4.05449	Q9FJU9	Glucan endo-1,3-beta-glucosidase 13 OS=Arabidopsis thaliana GN=At5g56590 PE=1 SV=1
	c44455_g1	16.5848	4.05179	Q9SUC9	Uncharacterized GPI-anchored protein At4g28100 OS=Arabidopsis thaliana GN=At4g28100 PE=1 SV=1
	c82274_g1	16.5848	4.05179	Q94JQ6	Cellulose synthase A catalytic subunit 6 [UDP-forming] OS=Arabidopsis thaliana GN=CESA6 PE=1 SV=2
	c59868_g1	16.5838	4.0517	Q8LC03	Homeobox-leucine zipper protein ATHB-13 OS=Arabidopsis thaliana GN=ATHB-13 PE=2 SV=2
	c49629_g1	16.5817	4.05152
	c52180_g1	16.5594	4.04958
	c31710_g1	16.5161	4.0458	Q8LC68	NAP1-related protein 2 OS=Arabidopsis thaliana GN=NRP2 PE=1 SV=2
	c63472_g5	16.4819	4.04281	O49545	Leucine-rich repeat receptor-like serine/threonine-protein kinase BAM1 OS=Arabidopsis thaliana GN=BAM1 PE=1 SV=1
	c110122_g1	16.4721	4.04196	Q84VY3	Acyl-[acyl-carrier-protein] desaturase 6, chloroplastic OS=Arabidopsis thaliana GN=S-ACP-DES6 PE=2 SV=2
	c58684_g1	16.4721	4.04196
	c41639_g1	16.4639	4.04123
	c60311_g1	16.4639	4.04123	Q39071	Cyclin-A2-1 OS=Arabidopsis thaliana GN=CYCA2-1 PE=2 SV=3
	c60675_g8	16.454	4.04036	G7J3D6	DEK domain chromatin associated protein OS=Medicago truncatula GN=MTR_3g098990 PE=4 SV=1
	c63444_g4	16.4442	4.03951
	c92195_g1	16.4411	4.03923	Q9SCP2	Probable pectate lyase 12 OS=Arabidopsis thaliana GN=At3g53190 PE=2 SV=2
	c134820_g1	16.4289	4.03816	P08927	RuBisCO large subunit-binding protein subunit beta, chloroplastic OS=Pisum sativum PE=1 SV=2
	c92415_g1	16.3878	4.03455	Q9CAG3	Lipoxygenase 6, chloroplastic OS=Arabidopsis thaliana GN=LOX6 PE=2 SV=1
	c79105_g1	16.3861	4.0344	A0A0B2S6Y3	Seipin OS=Glycine soja GN=glysoja_000971 PE=4 SV=1
	c61607_g7	16.3736	4.0333	Q9MAJ7	Beta-galactosidase 5 OS=Arabidopsis thaliana GN=BGAL5 PE=2 SV=1
	c22640_g1	16.3713	4.0331	G7J863	Metal-dependent protein hydrolase OS=Medicago truncatula GN=MTR_3g092050 PE=4 SV=1
	c45902_g1	16.3268	4.02917	Q9ZPV5	Nucleolar complex protein 2 homolog OS=Arabidopsis thaliana GN=At2g18220 PE=3 SV=2
	c58144_g1	16.3228	4.02881	P0CB23	Uncharacterized protein At4g38062 OS=Arabidopsis thaliana GN=At4g38062 PE=4 SV=1
	c45290_g1	16.2816	4.02517	A0A0B2NYV0	WD repeat-containing protein 3 OS=Glycine soja GN=glysoja_002320 PE=4 SV=1
	c48000_g1	16.2755	4.02463	Q9T0K5	Leucine-rich repeat extensin-like protein 3 OS=Arabidopsis thaliana GN=LRX3 PE=1 SV=1
	c107332_g1	16.2755	4.02463	Q0JF58	Protein argonaute 4B OS=Oryza sativa subsp. japonica GN=AGO4B PE=2 SV=1
	c82395_g1	16.2755	4.02463	Q7XLP4	B3 domain-containing protein Os04g0386900 OS=Oryza sativa subsp. japonica GN=Os04g0386900 PE=2 SV=3
	c39542_g1	16.2755	4.02463	Q8W4F0	Protein DA1-related 1 OS=Arabidopsis thaliana GN=DAR1 PE=1 SV=3
	c38592_g1	16.2755	4.02463	Q9FVV1	GDSL esterase/lipase At1g71250 OS=Arabidopsis thaliana GN=At1g71250 PE=2 SV=1
	c41088_g1	16.2602	4.02328	Q0JL73	DEAD-box ATP-dependent RNA helicase 26 OS=Oryza sativa subsp. japonica GN=Os01g0618500 PE=2 SV=1
	c82377_g1	16.2547	4.02278
	c60296_g1	16.2345	4.02099	Q1PFD1	BEL1-like homeodomain protein 11 OS=Arabidopsis thaliana GN=BLH11 PE=2 SV=1
	c56265_g2	16.2264	4.02027	Q9C977	Pentatricopeptide repeat-containing protein At1g80270, mitochondrial OS=Arabidopsis thaliana GN=At1g80270 PE=2 SV=1
	c38113_g1	16.2264	4.02027	Q8S9K3	Zinc finger protein VAR3, chloroplastic OS=Arabidopsis thaliana GN=VAR3 PE=1 SV=2
	c82635_g1	16.2007	4.01798
	c120794_g1	16.2007	4.01798	V7C4U0	Uncharacterized protein OS=Phaseolus vulgaris GN=PHAVU_004G088900g PE=4 SV=1
	c51043_g3	16.2007	4.01798
	c106964_g1	16.2007	4.01798
	c52081_g1	16.2007	4.01798	P0C8Q8	Pentatricopeptide repeat-containing protein At5g19020, mitochondrial OS=Arabidopsis thaliana GN=PCMP-E42 PE=2 SV=1
	c63294_g1	16.2007	4.01798	O23755	Elongation factor 2 OS=Beta vulgaris PE=2 SV=1
	c61950_g1	16.1796	4.0161	P37392	Tubulin beta-1 chain OS=Lupinus albus GN=TUBB1 PE=3 SV=1
	c60129_g1	16.1717	4.0154	Q9FKY5	MLO-like protein 10 OS=Arabidopsis thaliana GN=MLO10 PE=2 SV=1
	c54639_g1	16.1648	4.01479	Q9ZPY2	Laccase-6 OS=Arabidopsis thaliana GN=LAC6 PE=2 SV=1
	c46568_g2	16.1578	4.01416	O82277	Transcription factor TCP10 OS=Arabidopsis thaliana GN=TCP10 PE=1 SV=1
	c7238_g1	16.1527	4.0137	Q5YLB4	DNA gyrase subunit B, chloroplastic/mitochondrial OS=Nicotiana benthamiana GN=GYRB PE=2 SV=1
	c58671_g1	16.1301	4.01168	Q0WR59	Probable inactive receptor kinase At5g10020 OS=Arabidopsis thaliana GN=At5g10020 PE=1 SV=2
	c59835_g3	16.1301	4.01168
	c60005_g2	16.1155	4.01038	Q93Y06	Probable inactive receptor kinase At5g67200 OS=Arabidopsis thaliana GN=At5g67200 PE=1 SV=1
	c36493_g1	16.0931	4.00837	Q9LZ03	DNA topoisomerase 6 subunit A OS=Arabidopsis thaliana GN=TOP6A PE=1 SV=1
	c93989_g1	16.0549	4.00494	Q9SZA4	Cell division cycle 20.1, cofactor of APC complex OS=Arabidopsis thaliana GN=CDC20-1 PE=1 SV=1
	c64320_g1	16.0243	4.00219
	c62635_g2	15.9731	3.99757	O49858	Cytochrome P450 82A3 OS=Glycine max GN=CYP82A3 PE=2 SV=1
	c60957_g3	15.9541	3.99586
	c59688_g1	15.9541	3.99586
	c33554_g1	15.9287	3.99356	Q8LG10	GATA transcription factor 15 OS=Arabidopsis thaliana GN=GATA15 PE=2 SV=2
	c57772_g1	15.9029	3.99122	Q8GWW4	UDP-glucuronate:xylan alpha-glucuronosyltransferase 2 OS=Arabidopsis thaliana GN=GUX2 PE=2 SV=1
	c60957_g6	15.9029	3.99122
	c59211_g2	15.9006	3.99101	Q9SJR5	Growth-regulating factor 3 OS=Arabidopsis thaliana GN=GRF3 PE=2 SV=1
	c93030_g1	15.8114	3.98289
	c64427_g1	15.7708	3.97919	Q9LXK1	Replication protein A 14 kDa subunit A OS=Arabidopsis thaliana GN=RPA3A PE=2 SV=1
	c63244_g3	15.7397	3.97633
	c60464_g2	15.7397	3.97633
	c1625_g1	15.7309	3.97553
	c49349_g1	15.7309	3.97553	Q9XI37	SNF1-related protein kinase regulatory subunit gamma-like PV42a OS=Arabidopsis thaliana GN=PV42A PE=2 SV=1
	c44703_g1	15.7309	3.97553
	c63326_g2	15.7173	3.97428	Q9FL51	Probably inactive leucine-rich repeat receptor-like protein kinase At5g06940 OS=Arabidopsis thaliana GN=At5g06940 PE=3 SV=1
	c78699_g1	15.7089	3.97351
	c57794_g1	15.7042	3.97308
	c9460_g1	15.6578	3.96881
	c78971_g1	15.6012	3.96359
	c55769_g2	15.5757	3.96122
	c61804_g2	15.56	3.95977	Q9M6E2	10-deacetylbaccatin III 10-O-acetyltransferase OS=Taxus cuspidata PE=1 SV=1
	c57164_g2	15.5492	3.95876	Q67ZI9	GDSL esterase/lipase At2g42990 OS=Arabidopsis thaliana GN=At2g42990 PE=2 SV=1
	c27723_g1	15.5303	3.95702	Q5D869	DNA-directed RNA polymerase V subunit 1 OS=Arabidopsis thaliana GN=NRPE1 PE=1 SV=1
	c123890_g1	15.5303	3.95702	Q9LFH9	L-type lectin-domain containing receptor kinase VIII.1 OS=Arabidopsis thaliana GN=LECRK81 PE=2 SV=1
	c62428_g5	15.5303	3.95702	P93401	NADH-ubiquinone oxidoreductase chain 2 OS=Oenothera berteroana GN=ND2 PE=2 SV=2
	c52547_g1	15.5303	3.95702	A0A151U752	Transposon Ty3-G Gag-Pol polyprotein OS=Cajanus cajan GN=KK1_007822 PE=4 SV=1
	c38117_g2	15.5303	3.95702
	c44460_g2	15.5268	3.95669
	c18928_g1	15.5094	3.95507	Q9FT45	Fasciclin-like arabinogalactan protein 15 OS=Arabidopsis thaliana GN=FLA15 PE=2 SV=1
	c48197_g2	15.4503	3.94956	Q9LFR3	Gibberellin-regulated protein 14 OS=Arabidopsis thaliana GN=GASA14 PE=1 SV=1
	c54873_g1	15.4276	3.94744	Q9M7X9	Thioredoxin-like protein CITRX, chloroplastic OS=Arabidopsis thaliana GN=CITRX PE=1 SV=1
	c61054_g3	15.3942	3.94432	A7PZL3	Probable polygalacturonase OS=Vitis vinifera GN=GSVIVT00026920001 PE=1 SV=1
	c60485_g1	15.3885	3.94378	O81635	Kinesin-4 OS=Arabidopsis thaliana GN=ATK4 PE=1 SV=2
	c42609_g2	15.3864	3.94358
	c59197_g3	15.3864	3.94358	C0LGU5	Probable LRR receptor-like serine/threonine-protein kinase At5g45780 OS=Arabidopsis thaliana GN=At5g45780 PE=2 SV=1
	c34422_g1	15.385	3.94345
	c62607_g1	15.3848	3.94343	Q9ZP54	Poly [ADP-ribose] polymerase 1 OS=Arabidopsis thaliana GN=PARP1 PE=1 SV=2
	c15089_g1	15.3632	3.94141	Q8L500	Two-component response regulator-like APRR9 OS=Arabidopsis thaliana GN=APRR9 PE=1 SV=2
	c49242_g2	15.3535	3.9405
	c52496_g1	15.3535	3.9405	Q6YW64	Double-stranded RNA-binding protein 4 OS=Oryza sativa subsp. japonica GN=DRB4 PE=2 SV=1
	c57590_g4	15.3438	3.93958	F4I114	Probable serine/threonine-protein kinase At1g09600 OS=Arabidopsis thaliana GN=At1g09600 PE=3 SV=1
	c56184_g2	15.3263	3.93794	Q9LG23	Pentatricopeptide repeat-containing protein At1g55890, mitochondrial OS=Arabidopsis thaliana GN=At1g55890 PE=2 SV=1
	c92789_g1	15.2815	3.93371	G7JCN1	50S ribosomal protein L1p OS=Medicago truncatula GN=MTR_4g080120 PE=4 SV=1
	c61494_g1	15.2651	3.93217	Q9LHE3	Protein ASPARTIC PROTEASE IN GUARD CELL 2 OS=Arabidopsis thaliana GN=ASPG2 PE=2 SV=1
	c61274_g2	15.2504	3.93078	P10978	Retrovirus-related Pol polyprotein from transposon TNT 1-94 OS=Nicotiana tabacum PE=2 SV=1
	c39926_g2	15.2502	3.93076
	c47336_g1	15.2331	3.92914	G7K408	SWIB/MDM2 domain protein OS=Medicago truncatula GN=MTR_5g025500 PE=2 SV=1
	c63601_g1	15.1936	3.92539
	c20426_g2	15.1771	3.92382	Q9CAM7	Replication factor C subunit 2 OS=Arabidopsis thaliana GN=RFC2 PE=1 SV=1
	c54588_g1	15.1639	3.92257	Q39110	Gibberellin 20 oxidase 1 OS=Arabidopsis thaliana GN=GA20OX1 PE=2 SV=2
	c95325_g1	15.1639	3.92257
	c55153_g4	15.0969	3.91618
	c24879_g2	15.0745	3.91404
	c58348_g4	15.0745	3.91404	Q39821	Dynamin-related protein 12A OS=Glycine max PE=1 SV=1
	c55286_g9	15.0633	3.91297	Q41951	Aquaporin TIP2-1 OS=Arabidopsis thaliana GN=TIP2-1 PE=1 SV=2
	c9136_g1	14.9784	3.90481
	c9269_g2	14.9674	3.90375	Q06611	Aquaporin PIP1-2 OS=Arabidopsis thaliana GN=PIP1-2 PE=1 SV=1
	c80014_g1	14.9654	3.90356	P0C2F6	Putative ribonuclease H protein At1g65750 OS=Arabidopsis thaliana GN=At1g65750 PE=3 SV=1
	c51839_g1	14.9579	3.90283
	c54929_g1	14.9507	3.90214	G7K2J6	Condensin-2 complex subunit G2, putative OS=Medicago truncatula GN=MTR_5g015600 PE=4 SV=2
	c60978_g2	14.945	3.90159	Q9SXY0	Chromatin assembly factor 1 subunit FAS1 OS=Arabidopsis thaliana GN=FAS1 PE=1 SV=1
	c59753_g3	14.9336	3.90049
	c57924_g2	14.904	3.89763
	c47357_g1	14.8986	3.8971	Q84WN3	Bidirectional sugar transporter SWEET17 OS=Arabidopsis thaliana GN=SWEET17 PE=2 SV=2
	c56658_g1	14.8986	3.8971	Q9SD20	Protein POLLENLESS 3-LIKE 2 OS=Arabidopsis thaliana GN=At3g51280 PE=2 SV=1
	c52335_g2	14.8926	3.89653	Q39088	Dof zinc finger protein DOF3.4 OS=Arabidopsis thaliana GN=DOF3.4 PE=1 SV=2
	c53547_g2	14.8769	3.895
	c59478_g2	14.8769	3.895	P48621	Omega-3 fatty acid desaturase, chloroplastic OS=Glycine max GN=FAD7 PE=2 SV=1
	c51609_g2	14.8435	3.89176
	c61622_g1	14.8435	3.89176	P17093	40S ribosomal protein S11 OS=Glycine max GN=RPS11 PE=2 SV=2
	c52561_g1	14.8372	3.89115	A0A0B2P0L0	Putative Xaa-Pro aminopeptidase 3 OS=Glycine soja GN=glysoja_043258 PE=3 SV=1
	c5562_g1	14.8372	3.89115	Q8VZT0	Putative H/ACA ribonucleoprotein complex subunit 1-like protein 1 OS=Arabidopsis thaliana GN=At3g03920 PE=2 SV=1
	c54253_g1	14.8117	3.88867	Q94JQ6	Cellulose synthase A catalytic subunit 6 [UDP-forming] OS=Arabidopsis thaliana GN=CESA6 PE=1 SV=2
	c62854_g3	14.7969	3.88722
	c49454_g4	14.7795	3.88552	B9DHT4	ARM REPEAT PROTEIN INTERACTING WITH ABF2 OS=Arabidopsis thaliana GN=ARIA PE=1 SV=2
	c42507_g1	14.7724	3.88483	Q9M9W1	60S ribosomal protein L22-2 OS=Arabidopsis thaliana GN=RPL22B PE=2 SV=1
	c24294_g1	14.772	3.88479	Q9FIV6	Protease Do-like 10, mitochondrial OS=Arabidopsis thaliana GN=DEGP10 PE=2 SV=1
	c134997_g1	14.7579	3.88341	I1KPB4	Uncharacterized protein OS=Glycine max GN=GLYMA_08G015200 PE=3 SV=1
	c45522_g1	14.7428	3.88194	F4JI46	Rho GTPase-activating protein 2 OS=Arabidopsis thaliana GN=ROPGAP2 PE=1 SV=1
	c60006_g1	14.7193	3.87964	P54768	Tyrosine/DOPA decarboxylase 1 OS=Papaver somniferum GN=TYDC1 PE=2 SV=1
	c36460_g2	14.718	3.87951	Q8RWU4	Homeobox-leucine zipper protein MERISTEM L1 OS=Arabidopsis thaliana GN=ATML1 PE=2 SV=1
	c47712_g2	14.6977	3.87752	O49814	Beta-carotene hydroxylase 2, chloroplastic (Fragment) OS=Capsicum annuum GN=CA2 PE=2 SV=1
	c135059_g1	14.6764	3.87543	Q9C566	Peptidyl-prolyl cis-trans isomerase CYP40 OS=Arabidopsis thaliana GN=CYP40 PE=2 SV=1
	c62098_g3	14.6659	3.87439
	c58348_g2	14.6634	3.87415
	c54094_g1	14.6145	3.86933	Q93V99	Homeobox-leucine zipper protein PROTODERMAL FACTOR 2 OS=Arabidopsis thaliana GN=PDF2 PE=2 SV=1
	c121178_g1	14.6058	3.86847	H2DH21	Cytochrome P450 CYP72A219 OS=Panax ginseng PE=2 SV=1
	c55562_g4	14.572	3.86513
	c49524_g1	14.572	3.86513	F4JGP4	Kinesin-5 OS=Arabidopsis thaliana GN=ATK5 PE=2 SV=1
	c15439_g1	14.5467	3.86262
	c48350_g1	14.5467	3.86262	Q9SMV7	DNA mismatch repair protein MSH7 OS=Arabidopsis thaliana GN=MSH7 PE=1 SV=1
	c93307_g1	14.5089	3.85887	P0CG89	Histone H4 OS=Glycine max PE=3 SV=1
	c63232_g5	14.484	3.85639
	c55690_g3	14.4499	3.85299
	c51502_g1	14.4499	3.85299	Q9M2Z3	Flap endonuclease GEN-like 2 OS=Arabidopsis thaliana GN=GEN2 PE=2 SV=2
	c53828_g1	14.4499	3.85299	A0A061DZ78	Ribosomal protein L10 family protein isoform 2 OS=Theobroma cacao GN=TCM_006421 PE=4 SV=1
	c53080_g2	14.4499	3.85299	Q93ZR6	O-acyltransferase WSD1 OS=Arabidopsis thaliana GN=WSD1 PE=2 SV=1
	c58227_g1	14.4241	3.85041	Q8L4H0	Wee1-like protein kinase OS=Arabidopsis thaliana GN=WEE1 PE=1 SV=1
	c106774_g1	14.4027	3.84826
	c46322_g1	14.4027	3.84826
	c61021_g1	14.3708	3.84506	Q9SVU0	Probable indole-3-pyruvate monooxygenase YUCCA8 OS=Arabidopsis thaliana GN=YUC8 PE=2 SV=1
	c53625_g1	14.3708	3.84506	Q00451	36.4 kDa proline-rich protein OS=Solanum lycopersicum GN=TPRP-F1 PE=2 SV=1
	c96504_g1	14.3454	3.84251	Q39131	Lamin-like protein OS=Arabidopsis thaliana GN=At5g15350 PE=1 SV=1
	c59038_g1	14.3153	3.83949	Q9LRT1	Probably inactive leucine-rich repeat receptor-like protein kinase At3g28040 OS=Arabidopsis thaliana GN=At3g28040 PE=2 SV=1
	c54273_g4	14.2364	3.83152	Q9LSP9	Chitinase-like protein 2 OS=Arabidopsis thaliana GN=CTL2 PE=2 SV=1
	c58341_g3	14.2271	3.83057	Q9LUA2	Ethylene-responsive transcription factor ERF119 OS=Arabidopsis thaliana GN=ERF119 PE=2 SV=1
	c59862_g1	14.2271	3.83057
	c56564_g1	14.2176	3.82961	A0A0B2PHR1	Acyl-protein thioesterase 2 OS=Glycine soja GN=glysoja_023275 PE=4 SV=1
	c32997_g1	14.2156	3.82941	P47735	Receptor-like protein kinase 5 OS=Arabidopsis thaliana GN=RLK5 PE=1 SV=1
	c56680_g4	14.1973	3.82754	P27484	Glycine-rich protein 2 OS=Nicotiana sylvestris GN=GRP-2 PE=2 SV=1
	c61772_g5	14.1811	3.82589	C0LGP9	Probable leucine-rich repeat receptor-like protein kinase IMK3 OS=Arabidopsis thaliana GN=IMK3 PE=1 SV=1
	c22226_g1	14.1657	3.82433	Q9SV31	Probable aquaporin PIP2-5 OS=Arabidopsis thaliana GN=PIP2-5 PE=1 SV=1
	c39319_g2	14.1441	3.82213	Q9FE20	Serine/threonine-protein kinase PBS1 OS=Arabidopsis thaliana GN=PBS1 PE=1 SV=1
	c60910_g4	14.1037	3.818	P51820	Bifunctional dihydrofolate reductase-thymidylate synthase OS=Glycine max PE=1 SV=1
	c47602_g2	14.0948	3.81709	Q00624	L-ascorbate oxidase homolog OS=Brassica napus GN=Bp10 PE=2 SV=1
	c49403_g2	14.0821	3.81579
	c56465_g2	14.0754	3.81511	Q9SH58	Probable membrane-associated kinase regulator 2 OS=Arabidopsis thaliana GN=MAKR2 PE=2 SV=1
	c60478_g1	14.0664	3.81418	Q5XEZ5	Calcium permeable stress-gated cation channel 1 OS=Arabidopsis thaliana GN=CSC1 PE=2 SV=1
	c60095_g1	14.0535	3.81286
	c59241_g2	14.0511	3.81261	G7K3W4	Ribonuclease III domain protein OS=Medicago truncatula GN=MTR_5g016070 PE=4 SV=1
	c51552_g1	14.0229	3.80972	Q9LME2	Synaptonemal complex protein 1 OS=Arabidopsis thaliana GN=ZYP1A PE=2 SV=1
	c97426_g1	14.0229	3.80972	A0A151SFC1	Sister chromatid cohesion protein DCC1 OS=Cajanus cajan GN=KK1_024625 PE=4 SV=1
	c94006_g1	14.0229	3.80972
	c64960_g1	14.0229	3.80972	Q9SX73	Kinase-interacting family protein OS=Arabidopsis thaliana GN=At1g48405 PE=2 SV=1
	c37356_g1	14.0229	3.80972
	c53967_g1	14.0189	3.8093
	c138206_g1	14.0161	3.80901
	c79874_g1	14.0124	3.80863	P92964	Serine/arginine-rich splicing factor RS31 OS=Arabidopsis thaliana GN=RS31 PE=1 SV=2
	c63756_g7	14.0111	3.8085
	c33404_g1	14.0092	3.8083	V7B599	Uncharacterized protein OS=Phaseolus vulgaris GN=PHAVU_008G137400g PE=4 SV=1
	c61857_g1	14.0061	3.80798	Q9LSL1	Transcription factor bHLH93 OS=Arabidopsis thaliana GN=BHLH93 PE=1 SV=1
	c33916_g2	13.9348	3.80062
	c45209_g1	13.9348	3.80062	Q39265	Zinc finger protein 6 OS=Arabidopsis thaliana GN=ZFP6 PE=2 SV=1
	c53012_g1	13.9233	3.79943	Q94AH9	Mediator of RNA polymerase II transcription subunit 36a OS=Arabidopsis thaliana GN=MED36A PE=1 SV=2
	c56825_g1	13.9165	3.79872	A0A151SB78	Protein midA isogeny OS=Cajanus cajan GN=KK1_026113 PE=4 SV=1
	c917_g1	13.9165	3.79872
	c56909_g2	13.8987	3.79688	P32069	Anthranilate synthase alpha subunit 2, chloroplastic OS=Arabidopsis thaliana GN=ASA2 PE=2 SV=1
	c53624_g3	13.8972	3.79672
	c78786_g1	13.8779	3.79471	O64571	UBP1-associated proteins 1C OS=Arabidopsis thaliana GN=UBA1C PE=3 SV=2
	c57879_g3	13.8617	3.79303	Q8L4D8	Protein IQ-DOMAIN 31 OS=Arabidopsis thaliana GN=IQD31 PE=1 SV=1
	c42486_g1	13.8452	3.79131
	c48294_g1	13.843	3.79108	G7I2L6	Pre-mRNA splicing factor OS=Medicago truncatula GN=MTR_1g072740 PE=4 SV=2
	c61111_g6	13.843	3.79108
	c16445_g1	13.8364	3.7904	Q6Z4G3	UDP-arabinopyranose mutase 3 OS=Oryza sativa subsp. japonica GN=UAM3 PE=1 SV=1
	c57584_g2	13.8046	3.78707
	c65488_g1	13.803	3.78691	Q9FJV0	Mitogen-activated protein kinase kinase 6 OS=Arabidopsis thaliana GN=MKK6 PE=1 SV=1
	c60903_g1	13.7886	3.78541	Q9FT92	Uncharacterized protein At5g08430 OS=Arabidopsis thaliana GN=At5g08430 PE=1 SV=2
	c109911_g1	13.7821	3.78472	Q41001	Blue copper protein OS=Pisum sativum PE=2 SV=1
	c55232_g1	13.7169	3.77788
	c58232_g1	13.7169	3.77788
	c108944_g1	13.6931	3.77538	Q9FLE8	Uncharacterized protein At5g39865 OS=Arabidopsis thaliana GN=At5g39865 PE=2 SV=1
	c52190_g3	13.6881	3.77485
	c36171_g1	13.667	3.77263
	c53794_g1	13.6425	3.77003	Q8S9K3	Zinc finger protein VAR3, chloroplastic OS=Arabidopsis thaliana GN=VAR3 PE=1 SV=2
	c27164_g1	13.6311	3.76883	O50017	Poly [ADP-ribose] polymerase 2 OS=Zea mays GN=PARP2 PE=2 SV=1
	c60972_g3	13.5776	3.76315	Q00332	40S ribosomal protein S15a OS=Brassica napus GN=RPS15A PE=2 SV=3
	c139907_g1	13.4968	3.75454	Q9SSK5	MLP-like protein 43 OS=Arabidopsis thaliana GN=MLP43 PE=1 SV=1
	c52151_g2	13.4963	3.75449	Q9FK81	Uncharacterized protein At5g22580 OS=Arabidopsis thaliana GN=At5g22580 PE=1 SV=1
	c58035_g3	13.4366	3.7481	Q9LS40	Protein ASPARTIC PROTEASE IN GUARD CELL 1 OS=Arabidopsis thaliana GN=ASPG1 PE=1 SV=1
	c34791_g1	13.3214	3.73568	Q9SII5	Protein EXORDIUM-like 5 OS=Arabidopsis thaliana GN=EXL5 PE=2 SV=1
	c63314_g5	0.0744236	-3.7481	A0A0B2PRA9	Putative hydrolase YtaP OS=Glycine soja GN=glysoja_017823 PE=4 SV=1
	c52983_g2	0.0742804	-3.75088	Q93W88	Transcription factor bHLH137 OS=Arabidopsis thaliana GN=BHLH137 PE=2 SV=1
	c56251_g2	0.0735364	-3.7654	Q9SL29	Putative cyclic nucleotide-gated ion channel 15 OS=Arabidopsis thaliana GN=CNGC15 PE=3 SV=1
	c33773_g1	0.0731687	-3.77263	A0A103XSP2	Appr-1-p processing OS=Cynara cardunculus var. scolymus GN=Ccrd_001747 PE=4 SV=1
	c9074_g1	0.0731687	-3.77263
	c43175_g1	0.0731687	-3.77263	Q9SYZ7	UPF0496 protein At4g34320 OS=Arabidopsis thaliana GN=At4g34320 PE=2 SV=1
	c58832_g2	0.0722388	-3.79108	Q2V9B0	Transcription factor MYB1R1 OS=Solanum tuberosum PE=2 SV=1
	c37048_g1	0.0722388	-3.79108
	c55594_g1	0.0720496	-3.79487	O04953	Putative pectinesterase 52 OS=Arabidopsis thaliana GN=PME52 PE=2 SV=2
	c2054_g1	0.0713323	-3.8093	O23006	LysM domain-containing GPI-anchored protein 2 OS=Arabidopsis thaliana GN=LYM2 PE=1 SV=1
	c107270_g1	0.0705931	-3.82433
	c58805_g1	0.0692045	-3.85299
	c24877_g1	0.0692045	-3.85299
	c41760_g3	0.0691328	-3.85448
	c79201_g1	0.0687441	-3.86262	Q9FMC2	Basic leucine zipper 43 OS=Arabidopsis thaliana GN=BZIP43 PE=1 SV=1
	c39628_g1	0.0686268	-3.86508	Q9SGA8	UDP-glycosyltransferase 83A1 OS=Arabidopsis thaliana GN=UGT83A1 PE=2 SV=1
	c65780_g1	0.0686245	-3.86513
	c110460_g1	0.0684251	-3.86933
	c135106_g1	0.0683984	-3.86989	Q58FX0	BON1-associated protein 2 OS=Arabidopsis thaliana GN=BAP2 PE=1 SV=1
	c58031_g3	0.0677318	-3.88402	Q9SKD9	Probable WRKY transcription factor 46 OS=Arabidopsis thaliana GN=WRKY46 PE=2 SV=1
	c115637_g1	0.0673696	-3.89176
	c125095_g1	0.0672718	-3.89385
	c27696_g1	0.0671206	-3.8971	Q9LSQ6	Calcium-binding protein PBP1 OS=Arabidopsis thaliana GN=PBP1 PE=1 SV=1
	c60766_g7	0.0669631	-3.90049	Q6K4V2	Bidirectional sugar transporter SWEET4 OS=Oryza sativa subsp. japonica GN=SWEET4 PE=2 SV=1
	c53852_g3	0.0666011	-3.90831	Q8LCL8	Cysteine-rich and transmembrane domain-containing protein B OS=Arabidopsis thaliana GN=At3g57160 PE=3 SV=2
	c57393_g3	0.0663863	-3.91297	Q7XBH4	Myb-related protein Myb4 OS=Oryza sativa subsp. japonica GN=MYB4 PE=2 SV=2
	c44302_g1	0.0663372	-3.91404
	c17804_g1	0.0661598	-3.9179
	c136830_g1	0.0661296	-3.91856	P49092	Asparagine synthetase [glutamine-hydrolyzing] 1 OS=Lotus japonicus GN=AS1 PE=1 SV=2
	c58888_g1	0.0657186	-3.92755	Q9FK16	Arabinogalactan peptide 22 OS=Arabidopsis thaliana GN=AGP22 PE=3 SV=1
	c120499_g1	0.0653429	-3.93583
	c135230_g1	0.0650933	-3.94135
	c56896_g2	0.0650668	-3.94193	Q9SJE8	Aluminum-activated malate transporter 2 OS=Arabidopsis thaliana GN=ALMT2 PE=2 SV=2
	c51169_g1	0.0650646	-3.94198	Q9LT17	E3 ubiquitin ligase BIG BROTHER-related OS=Arabidopsis thaliana GN=BBR PE=2 SV=1
	c103103_g1	0.0648241	-3.94732	P25803	Vignain OS=Phaseolus vulgaris PE=2 SV=2
	c60291_g1	0.0644844	-3.95491
	c29342_g1	0.0644655	-3.95533	Q96453	14-3-3-like protein D OS=Glycine max GN=GF14D PE=1 SV=1
	c56080_g1	0.0644439	-3.95581
	c62846_g4	0.0644439	-3.95581
	c71410_g1	0.0644439	-3.95581
	c61256_g2	0.0644439	-3.95581	Q9C6P3	Calcium-dependent protein kinase 33 OS=Arabidopsis thaliana GN=CPK33 PE=2 SV=1
	c60122_g1	0.0643902	-3.95702
	c54853_g2	0.0643902	-3.95702	Q9SZY4	Protein NRT1/ PTR FAMILY 6.2 OS=Arabidopsis thaliana GN=NPF6.2 PE=1 SV=1
	c54622_g1	0.0643622	-3.95764
	c54666_g2	0.0640976	-3.96359	G7KNG0	Serinc-domain serine and sphingolipid biosynthesis protein OS=Medicago truncatula GN=MTR_6g086060 PE=4 SV=1
	c44072_g1	0.063737	-3.97172	Q96452	14-3-3-like protein C OS=Glycine max GN=GF14C PE=1 SV=1
	c64502_g1	0.0637165	-3.97219	O23522	Phospholipase A1-Ibeta2, chloroplastic OS=Arabidopsis thaliana GN=At4g16820 PE=1 SV=2
	c51204_g1	0.0629635	-3.98934	P22335	Heat shock factor protein HSF24 OS=Solanum peruvianum GN=HSF24 PE=2 SV=1
	c47514_g2	0.0627776	-3.99361
	c51573_g1	0.0627776	-3.99361	Q6K641	Eukaryotic translation initiation factor isoform 4G-2 OS=Oryza sativa subsp. japonica GN=Os02g0611500 PE=2 SV=1
	c53866_g1	0.0627776	-3.99361	Q6DYE5	UPF0496 protein At1g20180 OS=Arabidopsis thaliana GN=At1g20180 PE=2 SV=2
	c9345_g1	0.0627776	-3.99361
	c44986_g1	0.0626796	-3.99586
	c26207_g1	0.0626328	-3.99694	F4HVJ3	Protein POLLEN DEFECTIVE IN GUIDANCE 1 OS=Arabidopsis thaliana GN=POD1 PE=1 SV=1
	c65572_g1	0.0623274	-4.00399
	c16039_g1	0.0621882	-4.00721	Q9LIK7	Putative calcium-transporting ATPase 13, plasma membrane-type OS=Arabidopsis thaliana GN=ACA13 PE=3 SV=1
	c65070_g1	0.0617258	-4.01798
	c56200_g2	0.0615142	-4.02294	Q9M0Y3	Equilibrative nucleotide transporter 3 OS=Arabidopsis thaliana GN=ENT3 PE=1 SV=1
	c31929_g1	0.0614771	-4.02381	Q9LRP7	Autophagy-related protein 8i OS=Arabidopsis thaliana GN=ATG8I PE=2 SV=1
	c60334_g3	0.0614422	-4.02463	Q8L7Y8	Kinesin-like protein KIN12B OS=Arabidopsis thaliana GN=KIN12B PE=1 SV=1
	c33107_g2	0.0614422	-4.02463	Q8S403	Phosphate transporter PHO1 OS=Arabidopsis thaliana GN=PHO1 PE=2 SV=1
	c63233_g4	0.0614422	-4.02463	P92519	Uncharacterized mitochondrial protein AtMg00810 OS=Arabidopsis thaliana GN=AtMg00810 PE=4 SV=1
	c111146_g1	0.0614422	-4.02463
	c79198_g1	0.0612916	-4.02817
	c80977_g1	0.0611758	-4.0309	P33080	Auxin-induced protein X10A OS=Glycine max PE=2 SV=1
	c58691_g1	0.0610824	-4.0331	O64583	Probable protein phosphatase 2C 28 OS=Arabidopsis thaliana GN=At2g34740 PE=2 SV=2
	c23572_g1	0.060645	-4.04347
	c56094_g1	0.0600671	-4.05728	Q9ZNS0	Probable polyol transporter 3 OS=Arabidopsis thaliana GN=PLT3 PE=3 SV=1
	c137602_g1	0.0600671	-4.05728
	c48238_g2	0.0598874	-4.0616	Q9ZU51	Probable E3 ubiquitin-protein ligase RHA2B OS=Arabidopsis thaliana GN=RHA2B PE=1 SV=2
	c123071_g1	0.0598351	-4.06286
	c33542_g1	0.059768	-4.06448
	c130192_g1	0.0597244	-4.06554
	c45641_g1	0.0597244	-4.06554	Q38850	Transcription repressor MYB5 OS=Arabidopsis thaliana GN=MYB5 PE=1 SV=1
	c5740_g1	0.0595777	-4.06908	C0LGK9	Probable LRR receptor-like serine/threonine-protein kinase At2g24230 OS=Arabidopsis thaliana GN=At2g24230 PE=2 SV=1
	c59250_g2	0.0594602	-4.07193	Q9ZUF7	Protein LURP-one-related 6 OS=Arabidopsis thaliana GN=At2g05910 PE=2 SV=1
	c92628_g1	0.0594262	-4.07276	P24805	Stem-specific protein TSJT1 OS=Nicotiana tabacum GN=TSJT1 PE=2 SV=1
	c59714_g4	0.0594043	-4.07329	F4HW02	GABA transporter 1 OS=Arabidopsis thaliana GN=GAT1 PE=1 SV=1
	c64215_g1	0.0591859	-4.0786
	c37048_g2	0.0587899	-4.08829
	c107005_g1	0.0586152	-4.09258	Q9FLJ2	NAC domain-containing protein 100 OS=Arabidopsis thaliana GN=NAC100 PE=2 SV=1
	c29048_g1	0.058188	-4.10313	Q42410	Zinc finger protein ZAT12 OS=Arabidopsis thaliana GN=ZAT12 PE=2 SV=1
	c42318_g2	0.0578488	-4.11157
	c114864_g1	0.0577784	-4.11333
	c135799_g1	0.0576308	-4.11702
	c62619_g1	0.0575984	-4.11783
	c27045_g1	0.0575787	-4.11832	Q9ZWB4	Coumaroyl-CoA:anthocyanidin 3-O-glucoside-6''-O-coumaroyltransferase 1 OS=Arabidopsis thaliana GN=3AT1 PE=1 SV=1
	c57370_g1	0.0574938	-4.12045
	c45889_g1	0.0574938	-4.12045
	c120852_g1	0.0572306	-4.12707
	c135593_g1	0.057071	-4.1311	O80450	Trihelix transcription factor GT-3b OS=Arabidopsis thaliana GN=GT-3B PE=1 SV=1
	c51152_g1	0.0567954	-4.13808	Q9ZNS6	Hydrophobic protein RCI2B OS=Arabidopsis thaliana GN=RCI2B PE=2 SV=1
	c57155_g2	0.0567323	-4.13969	Q2PCF1	Pleiotropic drug resistance protein 2 OS=Nicotiana plumbaginifolia GN=PDR2 PE=2 SV=1
	c36044_g2	0.0567323	-4.13969	Q8VZP6	Putative glucuronosyltransferase PGSIP8 OS=Arabidopsis thaliana GN=PGSIP8 PE=2 SV=1
	c14399_g1	0.0567323	-4.13969
	c2411_g1	0.0566499	-4.14178
	c10747_g1	0.0562881	-4.15103
	c51542_g2	0.0562881	-4.15103
	c11712_g1	0.0560301	-4.15765	Q9SA05	Potassium transporter 10 OS=Arabidopsis thaliana GN=POT10 PE=2 SV=2
	c49032_g1	0.0553611	-4.17498
	c52037_g2	0.0552462	-4.17798
	c98635_g1	0.0551622	-4.18018
	c22401_g1	0.0551319	-4.18097
	c17007_g1	0.0550724	-4.18253	O04887	Pectinesterase 2 OS=Citrus sinensis GN=PECS-2.1 PE=2 SV=1
	c42004_g1	0.0550396	-4.18339	Q9SCX8	Purple acid phosphatase 17 OS=Arabidopsis thaliana GN=PAP17 PE=2 SV=1
	c63634_g3	0.0548833	-4.18749	Q6YU51	Probable 1-deoxy-D-xylulose-5-phosphate synthase 2, chloroplastic OS=Oryza sativa subsp. japonica GN=Os07g0190000 PE=2 SV=1
	c76055_g1	0.0548833	-4.18749
	c22930_g1	0.0546845	-4.19272
	c137003_g1	0.0546192	-4.19445	Q9LSK9	Uncharacterized protein At5g65660 OS=Arabidopsis thaliana GN=At5g65660 PE=2 SV=1
	c36044_g1	0.0542971	-4.20298	F4JMI5	Putative glucuronosyltransferase PGSIP7 OS=Arabidopsis thaliana GN=PGSIP7 PE=3 SV=1
	c57982_g4	0.0540222	-4.2103
	c79334_g1	0.0540222	-4.2103	Q8LBH4	SPX domain-containing protein 1 OS=Arabidopsis thaliana GN=SPX1 PE=2 SV=2
	c124002_g1	0.0537834	-4.2167
	c83760_g1	0.053774	-4.21695	Q8L586	Uncharacterized membrane protein At4g09580 OS=Arabidopsis thaliana GN=At4g09580 PE=1 SV=1
	c84944_g1	0.0536078	-4.22141	Q41951	Aquaporin TIP2-1 OS=Arabidopsis thaliana GN=TIP2-1 PE=1 SV=2
	c78442_g1	0.0535321	-4.22345	P25803	Vignain OS=Phaseolus vulgaris PE=2 SV=2
	c64056_g1	0.0534189	-4.22651	Q39529	Agglutinin-2 OS=Cladrastis kentukea PE=1 SV=1
	c80851_g1	0.0532709	-4.23051	Q9FHN4	Probable pectinesterase/pectinesterase inhibitor 60 OS=Arabidopsis thaliana GN=PME60 PE=2 SV=1
	c35977_g3	0.0531511	-4.23376	O80992	Abscisic acid receptor PYL2 OS=Arabidopsis thaliana GN=PYL2 PE=1 SV=1
	c93561_g1	0.0530537	-4.2364
	c52678_g1	0.0529564	-4.23905
	c62796_g2	0.0529564	-4.23905
	c93020_g1	0.0528678	-4.24147
	c36657_g1	0.0525653	-4.24975	P22335	Heat shock factor protein HSF24 OS=Solanum peruvianum GN=HSF24 PE=2 SV=1
	c49209_g1	0.052214	-4.25942	Q8LAX0	Homocysteine S-methyltransferase 3 OS=Arabidopsis thaliana GN=HMT3 PE=1 SV=2
	c114892_g1	0.0515249	-4.27859
	c16687_g1	0.0515249	-4.27859	Q8RX29	RING-H2 finger protein ATL70 OS=Arabidopsis thaliana GN=ATL70 PE=2 SV=1
	c108483_g1	0.0513928	-4.28229
	c93962_g1	0.050946	-4.29489
	c33007_g1	0.050946	-4.29489	Q9SU30	F-box protein CPR30 OS=Arabidopsis thaliana GN=CPR30 PE=1 SV=2
	c58967_g5	0.050946	-4.29489	Q8GUK7	E3 ubiquitin-protein ligase RMA3 OS=Arabidopsis thaliana GN=RMA3 PE=1 SV=1
	c40842_g1	0.0508779	-4.29682
	c95605_g1	0.0506857	-4.30228
	c49451_g1	0.0505715	-4.30553	O49459	NAC domain-containing protein 73 OS=Arabidopsis thaliana GN=NAC073 PE=2 SV=1
	c48971_g2	0.0505102	-4.30728	P10978	Retrovirus-related Pol polyprotein from transposon TNT 1-94 OS=Nicotiana tabacum PE=2 SV=1
	c95734_g1	0.0503675	-4.31136	O48781	SPX domain-containing protein 2 OS=Arabidopsis thaliana GN=SPX2 PE=2 SV=1
	c58351_g1	0.050341	-4.31212	Q9LPF1	WAT1-related protein At1g44800 OS=Arabidopsis thaliana GN=At1g44800 PE=1 SV=1
	c45284_g1	0.0499988	-4.32196	Q682U6	Exonuclease DPD1, chloroplastic/mitochondrial OS=Arabidopsis thaliana GN=DPD1 PE=1 SV=1
	c5053_g1	0.049997	-4.32201
	c56313_g2	0.049997	-4.32201
	c57024_g6	0.049997	-4.32201	Q76CU2	Pleiotropic drug resistance protein 1 OS=Nicotiana tabacum GN=PDR1 PE=2 SV=1
	c37653_g1	0.0499953	-4.32206
	c32792_g1	0.0495356	-4.33539	P10978	Retrovirus-related Pol polyprotein from transposon TNT 1-94 OS=Nicotiana tabacum PE=2 SV=1
	c3661_g1	0.0492365	-4.34413	O80669	Sigma factor binding protein 2, chloroplastic OS=Arabidopsis thaliana GN=SIB2 PE=1 SV=1
	c47271_g1	0.0490827	-4.34864	Q94BT9	Copper transport protein ATX1 OS=Arabidopsis thaliana GN=ATX1 PE=1 SV=1
	c47812_g2	0.0490827	-4.34864
	c41260_g1	0.0490827	-4.34864
	c42651_g1	0.0489532	-4.35245
	c84451_g1	0.0485538	-4.36427
	c73226_g1	0.0484235	-4.36815
	c59706_g2	0.0484133	-4.36845
	c43981_g1	0.0482013	-4.37478
	c62724_g17	0.0481962	-4.37494	B3H7A9	Probable peroxygenase 7 OS=Arabidopsis thaliana GN=PXG7 PE=2 SV=1
	c109609_g1	0.0481203	-4.37721
	c123280_g1	0.0480098	-4.38053	Q58FX0	BON1-associated protein 2 OS=Arabidopsis thaliana GN=BAP2 PE=1 SV=1
	c64360_g1	0.0478633	-4.38494	C0LGK9	Probable LRR receptor-like serine/threonine-protein kinase At2g24230 OS=Arabidopsis thaliana GN=At2g24230 PE=2 SV=1
	c37748_g1	0.0478633	-4.38494
	c19754_g1	0.0474234	-4.39826	Q40478	Ethylene-responsive transcription factor 5 OS=Nicotiana tabacum GN=ERF5 PE=2 SV=1
	c39621_g1	0.0473611	-4.40015
	c121644_g1	0.0473509	-4.40046
	c51606_g1	0.0473509	-4.40046	B8XCH5	Protein QUIRKY OS=Arabidopsis thaliana GN=QKY PE=2 SV=1
	c60282_g1	0.0471932	-4.40528	F4I460	Myosin-8 OS=Arabidopsis thaliana GN=XI-B PE=3 SV=1
	c35635_g1	0.0471932	-4.40528	Q9LP56	Probable WRKY transcription factor 65 OS=Arabidopsis thaliana GN=WRKY65 PE=2 SV=1
	c31902_g1	0.0471932	-4.40528
	c52678_g2	0.0468451	-4.41596
	c122610_g1	0.0462222	-4.43527	Q9SZ28	Stigma-specific STIG1-like protein 1 OS=Arabidopsis thaliana GN=At4g26880 PE=3 SV=1
	c60738_g1	0.0461319	-4.43809	Q9FZ62	Inorganic pyrophosphatase 2 OS=Arabidopsis thaliana GN=At1g17710 PE=2 SV=1
	c2769_g1	0.0459067	-4.44515
	c53752_g1	0.0459067	-4.44515
	c92698_g1	0.0453534	-4.46265
	c120388_g1	0.0450881	-4.47111	O04203	Nematode resistance protein-like HSPRO2 OS=Arabidopsis thaliana GN=HSPRO2 PE=1 SV=1
	c52946_g1	0.0449709	-4.47487	Q8GXB4	WAT1-related protein At1g09380 OS=Arabidopsis thaliana GN=At1g09380 PE=2 SV=1
	c37390_g1	0.0449535	-4.47542	Q9C9G4	Endonuclease 2 OS=Arabidopsis thaliana GN=ENDO2 PE=1 SV=1
	c120642_g1	0.044927	-4.47627
	c94360_g1	0.0446885	-4.48395
	c19510_g2	0.0444795	-4.49072	Q39529	Agglutinin-2 OS=Cladrastis kentukea PE=1 SV=1
	c54622_g4	0.0444582	-4.49141	P10978	Retrovirus-related Pol polyprotein from transposon TNT 1-94 OS=Nicotiana tabacum PE=2 SV=1
	c53844_g2	0.0442919	-4.49681	Q6NKX1	Proline dehydrogenase 2, mitochondrial OS=Arabidopsis thaliana GN=POX2 PE=2 SV=1
	c37627_g1	0.0442833	-4.49709
	c43723_g1	0.0441705	-4.50077
	c16143_g1	0.0438515	-4.51123	Q8GY42	NAC transcription factor 25 OS=Arabidopsis thaliana GN=NAC025 PE=2 SV=1
	c99644_g1	0.0435128	-4.52242
	c61648_g7	0.0435034	-4.52273
	c71866_g1	0.0434921	-4.5231
	c48750_g1	0.0432707	-4.53047
	c45820_g1	0.0429755	-4.54034	P33080	Auxin-induced protein X10A OS=Glycine max PE=2 SV=1
	c24611_g1	0.0427903	-4.54657
	c43082_g1	0.0425388	-4.55508
	c108985_g1	0.0423468	-4.5616	Q9FX85	Peroxidase 10 OS=Arabidopsis thaliana GN=PER10 PE=1 SV=1
	c121942_g1	0.0422128	-4.56618
	c21754_g1	0.0421902	-4.56695	O04203	Nematode resistance protein-like HSPRO2 OS=Arabidopsis thaliana GN=HSPRO2 PE=1 SV=1
	c58367_g2	0.0419923	-4.57373	Q7XKV4	Beta-glucosidase 12 OS=Oryza sativa subsp. japonica GN=BGLU12 PE=2 SV=2
	c54457_g2	0.0419401	-4.57552
	c69705_g1	0.0419401	-4.57552	A0A151T959	OTU domain-containing protein DDB-G0284757 OS=Cajanus cajan GN=KK1_018161 PE=4 SV=1
	c52983_g1	0.0418918	-4.57719	Q93W88	Transcription factor bHLH137 OS=Arabidopsis thaliana GN=BHLH137 PE=2 SV=1
	c50083_g1	0.0418918	-4.57719	Q6Z9C8	Heat stress transcription factor B-2b OS=Oryza sativa subsp. japonica GN=HSFB2B PE=2 SV=1
	c25033_g1	0.0416529	-4.58544	Q8LBI9	Sugar transporter ERD6-like 16 OS=Arabidopsis thaliana GN=At5g18840 PE=2 SV=2
	c72027_g1	0.0415412	-4.58931
	c67507_g1	0.0412023	-4.60113
	c54916_g1	0.0411229	-4.60391	Q9ZQ94	UDP-glycosyltransferase 73C5 OS=Arabidopsis thaliana GN=UGT73C5 PE=2 SV=1
	c56127_g3	0.0410094	-4.6079	O49500	E3 ubiquitin-protein ligase MBR2 OS=Arabidopsis thaliana GN=MBR2 PE=1 SV=1
	c38758_g1	0.0409868	-4.6087	P25083	ADP,ATP carrier protein, mitochondrial OS=Solanum tuberosum GN=ANT PE=2 SV=1
	c59530_g3	0.0409155	-4.61121
	c2607_g1	0.0404002	-4.62949
	c51358_g1	0.0404002	-4.62949	V7AZG9	Amine oxidase OS=Phaseolus vulgaris GN=PHAVU_009G174800g PE=3 SV=1
	c121842_g1	0.0402502	-4.63486
	c82312_g1	0.040143	-4.63871
	c27327_g1	0.0401103	-4.63988	P93332	Bidirectional sugar transporter N3 OS=Medicago truncatula GN=N3 PE=2 SV=1
	c120672_g1	0.0394537	-4.6637
	c52719_g1	0.0392859	-4.66984	Q9LMA8	Protein TIFY 10A OS=Arabidopsis thaliana GN=TIFY10A PE=1 SV=1
	c52678_g3	0.0391184	-4.67601
	c34761_g1	0.0390781	-4.6775
	c55587_g3	0.0389532	-4.68211	Q8GXE9	HVA22-like protein j OS=Arabidopsis thaliana GN=HVA22J PE=2 SV=2
	c79801_g1	0.0388124	-4.68734
	c52507_g1	0.038791	-4.68813
	c62535_g6	0.0386747	-4.69247	Q7XAP4	Probable GTP diphosphokinase RSH2, chloroplastic OS=Oryza sativa subsp. japonica GN=RSH2 PE=2 SV=1
	c49147_g2	0.0385505	-4.69711	Q39231	Sucrose transport protein SUC2 OS=Arabidopsis thaliana GN=SUC2 PE=1 SV=2
	c64490_g1	0.0385505	-4.69711	Q94CD1	Omega-hydroxypalmitate O-feruloyl transferase OS=Arabidopsis thaliana GN=HHT1 PE=1 SV=1
	c16719_g1	0.0384935	-4.69924
	c54707_g1	0.0384879	-4.69945	A0A151T5B8	Putative nuclease HARBI1 OS=Cajanus cajan GN=KK1_016775 PE=4 SV=1
	c53490_g1	0.0379306	-4.72049
	c55506_g2	0.0377253	-4.72832
	c59815_g1	0.0376878	-4.72976	P92934	Amino acid permease 6 OS=Arabidopsis thaliana GN=AAP6 PE=1 SV=1
	c60503_g1	0.0375673	-4.73438	Q8RWI9	ABC transporter G family member 15 OS=Arabidopsis thaliana GN=ABCG15 PE=2 SV=2
	c40113_g1	0.0372275	-4.74749
	c61394_g4	0.0372169	-4.7479	C0LGJ9	Probable LRR receptor-like serine/threonine-protein kinase At2g02780 OS=Arabidopsis thaliana GN=At2g02780 PE=2 SV=1
	c59530_g4	0.0369572	-4.758
	c16731_g1	0.0368628	-4.76169	A0A0B2PZD6	Mitochondrial substrate carrier family protein B (Fragment) OS=Glycine soja GN=glysoja_037545 PE=3 SV=1
	c61617_g1	0.0365901	-4.7724	P24465	Cytochrome P450 71A1 OS=Persea americana GN=CYP71A1 PE=1 SV=2
	c117014_g1	0.0362771	-4.7848	Q9FLJ2	NAC domain-containing protein 100 OS=Arabidopsis thaliana GN=NAC100 PE=2 SV=1
	c3490_g1	0.0355703	-4.81318	Q5EAF2	Type I inositol 1,4,5-trisphosphate 5-phosphatase 11 OS=Arabidopsis thaliana GN=At1g47510 PE=2 SV=1
	c47368_g1	0.0354638	-4.81751
	c121816_g1	0.0353764	-4.82107	Q96289	Zinc finger protein ZAT10 OS=Arabidopsis thaliana GN=ZAT10 PE=2 SV=1
	c33436_g1	0.0353167	-4.82351	B9EYD3	Phospholipase A1-II 4 OS=Oryza sativa subsp. japonica GN=Os01g0652300 PE=2 SV=2
	c57024_g3	0.0353167	-4.82351	Q76CU2	Pleiotropic drug resistance protein 1 OS=Nicotiana tabacum GN=PDR1 PE=2 SV=1
	c65485_g1	0.0353167	-4.82351
	c51003_g1	0.0353167	-4.82351
	c39196_g1	0.0353167	-4.82351
	c58314_g1	0.0353094	-4.8238	F4I114	Probable serine/threonine-protein kinase At1g09600 OS=Arabidopsis thaliana GN=At1g09600 PE=3 SV=1
	c54067_g2	0.0351553	-4.83012	Q9SVG4	Reticuline oxidase-like protein OS=Arabidopsis thaliana GN=At4g20830 PE=1 SV=2
	c19968_g1	0.035053	-4.83432	F4HVY0	Protein ECERIFERUM 1 OS=Arabidopsis thaliana GN=CER1 PE=1 SV=1
	c31212_g1	0.0348743	-4.84169
	c55999_g1	0.0340733	-4.87522	Q9FLM1	Glycerophosphodiester phosphodiesterase GDPD2 OS=Arabidopsis thaliana GN=GDPD2 PE=2 SV=1
	c140396_g1	0.0336416	-4.89361
	c114658_g1	0.0332263	-4.91153
	c58951_g2	0.0328822	-4.92655
	c57198_g2	0.0325834	-4.93972
	c27510_g1	0.0325834	-4.93972
	c19510_g1	0.0324614	-4.94513	Q39529	Agglutinin-2 OS=Cladrastis kentukea PE=1 SV=1
	c64511_g1	0.0323413	-4.95048	Q02919	Early nodulin-36B (Fragment) OS=Glycine max PE=2 SV=1
	c47175_g1	0.031965	-4.96737	Q9FFR9	Cation/H(+) antiporter 18 OS=Arabidopsis thaliana GN=CHX18 PE=2 SV=1
	c60087_g6	0.0315202	-4.98758	Q9ZUS1	WAT1-related protein At2g37460 OS=Arabidopsis thaliana GN=At2g37460 PE=2 SV=1
	c51006_g1	0.0310912	-5.00735	Q6NQN5	Bidirectional sugar transporter SWEET3 OS=Arabidopsis thaliana GN=SWEET3 PE=2 SV=1
	c78889_g1	0.0308803	-5.01717
	c69605_g1	0.0306523	-5.02786	Q9FXA3	Transcription factor bHLH95 OS=Arabidopsis thaliana GN=BHLH95 PE=2 SV=2
	c78385_g1	0.0292959	-5.09316	A0A068UI78	Uncharacterized protein OS=Coffea canephora GN=GSCOC_T00026913001 PE=4 SV=1
	c32533_g1	0.0291943	-5.09817
	c143091_g1	0.0291943	-5.09817
	c58087_g1	0.0289591	-5.10984	B9T677	Ubiquitin fusion degradaton protein, putative OS=Ricinus communis GN=RCOM_0300270 PE=4 SV=1
	c10793_g1	0.0288133	-5.11712	Q9ZP41	EG45-like domain containing protein OS=Citrus jambhiri GN=CjBAp12 PE=1 SV=1
	c60845_g1	0.0286752	-5.12405	Q6NKX1	Proline dehydrogenase 2, mitochondrial OS=Arabidopsis thaliana GN=POX2 PE=2 SV=1
	c16821_g1	0.028584	-5.12865
	c37791_g1	0.0281474	-5.15086
	c39216_g1	0.027751	-5.17132	Q9LUB9	BTB/POZ domain-containing protein At5g48130 OS=Arabidopsis thaliana GN=At5g48130 PE=2 SV=1
	c276_g1	0.0276603	-5.17604	Q9FLM1	Glycerophosphodiester phosphodiesterase GDPD2 OS=Arabidopsis thaliana GN=GDPD2 PE=2 SV=1
	c63920_g1	0.0275063	-5.18409	P04793	17.5 kDa class I heat shock protein OS=Glycine max GN=HSP17.5-M PE=3 SV=1
	c62667_g10	0.0268656	-5.2181
	c51606_g3	0.0268656	-5.2181	B8XCH5	Protein QUIRKY OS=Arabidopsis thaliana GN=QKY PE=2 SV=1
	c46632_g1	0.0267648	-5.22352	O04203	Nematode resistance protein-like HSPRO2 OS=Arabidopsis thaliana GN=HSPRO2 PE=1 SV=1
	c60087_g2	0.0256401	-5.28545	Q9ZUS1	WAT1-related protein At2g37460 OS=Arabidopsis thaliana GN=At2g37460 PE=2 SV=1
	c63190_g3	0.0256385	-5.28554
	c59427_g1	0.0256385	-5.28554
	c122876_g1	0.0251858	-5.31124	P21747	Embryonic abundant protein USP92 OS=Vicia faba PE=2 SV=1
	c10717_g1	0.0248809	-5.32881	P51851	Pyruvate decarboxylase 2 (Fragment) OS=Pisum sativum GN=PDC2 PE=2 SV=1
	c55783_g2	0.0247472	-5.33659
	c9086_g1	0.0245187	-5.34997	Q8LPL2	Protein NRT1/ PTR FAMILY 1.1 OS=Arabidopsis thaliana GN=NPF1.1 PE=1 SV=2
	c78215_g1	0.024406	-5.35662	Q9FLN0	GDSL esterase/lipase 1 OS=Arabidopsis thaliana GN=GLIP1 PE=1 SV=1
	c94313_g1	0.0244012	-5.35691
	c108869_g1	0.0238249	-5.39138	F4JJ23	Protein NEN4 OS=Arabidopsis thaliana GN=NEN4 PE=2 SV=1
	c93538_g1	0.0225489	-5.4708	O49255	NAC transcription factor 29 OS=Arabidopsis thaliana GN=NAC029 PE=2 SV=1
	c904_g1	0.0225489	-5.4708
	c35927_g1	0.0223036	-5.48658	Q8GTB6	Tetrahydrocannabinolic acid synthase OS=Cannabis sativa PE=1 SV=1
	c58646_g3	0.0219608	-5.50893	P81391	Myb-related protein 305 OS=Antirrhinum majus GN=MYB305 PE=2 SV=1
	c138061_g1	0.0218883	-5.5137	Q9FY94	Bidirectional sugar transporter SWEET15 OS=Arabidopsis thaliana GN=SWEET15 PE=2 SV=1
	c107038_g1	0.0216314	-5.53073
	c61288_g4	0.0208418	-5.58438	P93022	Auxin response factor 7 OS=Arabidopsis thaliana GN=ARF7 PE=1 SV=2
	c57884_g1	0.0207593	-5.5901	Q9SQ80	Gibberellin 2-beta-dioxygenase 1 OS=Pisum sativum GN=GA2OX1 PE=1 SV=1
	c64374_g1	0.0202288	-5.62744
	c64553_g1	0.0201238	-5.63495
	c58960_g2	0.0199661	-5.6463	V7B154	Uncharacterized protein OS=Phaseolus vulgaris GN=PHAVU_008G040900g PE=4 SV=1
	c107857_g1	0.0198572	-5.65419	O82730	Monogalactosyldiacylglycerol synthase 2, chloroplastic OS=Arabidopsis thaliana GN=MGD2 PE=1 SV=1
	c25173_g1	0.019368	-5.69018	Q9SQ80	Gibberellin 2-beta-dioxygenase 1 OS=Pisum sativum GN=GA2OX1 PE=1 SV=1
	c58646_g1	0.0192058	-5.70231	Q9LDE1	Transcription factor MYB108 OS=Arabidopsis thaliana GN=MYB108 PE=1 SV=1
	c16728_g1	0.0190785	-5.71191
	c65111_g1	0.0187775	-5.73485	P42849	Umecyanin OS=Armoracia rusticana PE=1 SV=1
	c51121_g2	0.0185704	-5.75085	Q8GX69	Beta-galactosidase 16 OS=Arabidopsis thaliana GN=BGAL16 PE=2 SV=2
	c35977_g2	0.0183679	-5.76667	O80992	Abscisic acid receptor PYL2 OS=Arabidopsis thaliana GN=PYL2 PE=1 SV=1
	c60339_g11	0.0181742	-5.78196
	c37828_g1	0.0176143	-5.82711	O23208	Homeobox-leucine zipper protein ATHB-40 OS=Arabidopsis thaliana GN=ATHB-40 PE=2 SV=3
	c62254_g2	0.0166184	-5.91107
	c30938_g1	0.0165615	-5.91602	O65351	Subtilisin-like protease SBT1.7 OS=Arabidopsis thaliana GN=SBT1.7 PE=1 SV=1
	c61550_g1	0.016257	-5.94279	A0A072TTI4	Cellulase/Endoglucanase (Glycosyl hydrolase family 5) OS=Medicago truncatula GN=MTR_8g089665 PE=3 SV=1
	c15978_g1	0.0160311	-5.96298	V7CPK7	Uncharacterized protein OS=Phaseolus vulgaris GN=PHAVU_002G214100g PE=4 SV=1
	c55503_g1	0.0153599	-6.02469	Q38945	PAP-specific phosphatase HAL2-like OS=Arabidopsis thaliana GN=AHL PE=2 SV=1
	c121523_g1	0.0153536	-6.02528
	c60779_g6	0.0149152	-6.06707	F4JJ23	Protein NEN4 OS=Arabidopsis thaliana GN=NEN4 PE=2 SV=1
	c37828_g2	0.014696	-6.08843	O23208	Homeobox-leucine zipper protein ATHB-40 OS=Arabidopsis thaliana GN=ATHB-40 PE=2 SV=3
	c55983_g2	0.0140707	-6.15116	Q9SZR9	ABC transporter G family member 9 OS=Arabidopsis thaliana GN=ABCG9 PE=3 SV=2
	c123099_g1	0.0140024	-6.15818	G7J3G2	SWIM zinc finger protein/MAP kinase kinase kinase (Mapkkk), putative OS=Medicago truncatula GN=MTR_3g109690 PE=4 SV=1
	c39104_g1	0.0136101	-6.19918	Q9M384	Protein SCARECROW OS=Arabidopsis thaliana GN=SCR PE=1 SV=1
	c137504_g1	0.0131198	-6.25211	Q39232	Sucrose transport protein SUC1 OS=Arabidopsis thaliana GN=SUC1 PE=1 SV=1
	c21771_g1	0.0126795	-6.30136	Q9SRV3	LOB domain-containing protein 20 OS=Arabidopsis thaliana GN=LBD20 PE=2 SV=1
	c85072_g1	0.0120561	-6.37409
	c15642_g1	0.0116858	-6.4191	Q58FX0	BON1-associated protein 2 OS=Arabidopsis thaliana GN=BAP2 PE=1 SV=1
	c54360_g1	0.0115602	-6.43469	Q94CH6	GDSL esterase/lipase EXL3 OS=Arabidopsis thaliana GN=EXL3 PE=2 SV=1
	c39172_g1	0.0111023	-6.493	Q39090	Protein UNUSUAL FLORAL ORGANS OS=Arabidopsis thaliana GN=UFO PE=1 SV=2
	c53596_g1	0.0110598	-6.49853	Q7XEY9	SPX domain-containing protein 3 OS=Oryza sativa subsp. japonica GN=SPX3 PE=2 SV=1
	c35616_g1	0.0101858	-6.6173
	c86078_g1	0.00975493	-6.67965	Q9FZ62	Inorganic pyrophosphatase 2 OS=Arabidopsis thaliana GN=At1g17710 PE=2 SV=1
	c106646_g1	0.00959034	-6.7042
	c92197_g1	0.00928193	-6.75136	Q38945	PAP-specific phosphatase HAL2-like OS=Arabidopsis thaliana GN=AHL PE=2 SV=1
	c134794_g1	0.00884133	-6.82152	Q9ZU70	Homeobox-leucine zipper protein ATHB-21 OS=Arabidopsis thaliana GN=ATHB-21 PE=2 SV=1
	c123283_g1	0.00770603	-7.0198
	c15548_g1	0.00725974	-7.10587	Q9SMZ4	Alpha-aminoadipic semialdehyde synthase OS=Arabidopsis thaliana GN=LKR/SDH PE=1 SV=1
	c107017_g1	0.00696321	-7.16603	Q9S7I0	tRNA(adenine(34)) deaminase, chloroplastic OS=Arabidopsis thaliana GN=TADA E=1SV=1

## Sheet: Table S9
Table S9. List and annotation of differentially expressed genes (DEGs) between FPAB and FPNAB with PPDE < 0.05.
	Unigene ID	FC	log2FC	UniProt Acc. No	Gene description
	c55153_g3	426.246	8.73554
	c26286_g1	190.856	7.57634
	c45544_g2	122.358	6.93497	Q8LB81	GDSL esterase/lipase At5g33370 OS=Arabidopsis thaliana GN=At5g33370 PE=2 SV=1
	c58139_g2	110.071	6.78229
	c3800_g1	100.023	6.64418
	c144358_g1	85.4	6.41616
	c55153_g1	72.8017	6.1859	Q9S728	Protodermal factor 1 OS=Arabidopsis thaliana GN=PDF1 PE=2 SV=1
	c60612_g22	72.5828	6.18156	Q9M9Y9	Monothiol glutaredoxin-S11 OS=Arabidopsis thaliana GN=GRXS11 PE=3 SV=1
	c58764_g1	67.2216	6.07085
	c3753_g1	61.3785	5.93966	P46417	Glutathione S-transferase 3 OS=Glycine max GN=GST3 PE=1 SV=1
	c55153_g2	60.8358	5.92685	Q9S728	Protodermal factor 1 OS=Arabidopsis thaliana GN=PDF1 PE=2 SV=1
	c51218_g1	60.4422	5.91748	Q9FVC1	MADS-box protein SVP OS=Arabidopsis thaliana GN=SVP PE=1 SV=1
	c52215_g3	60.2474	5.91283	P14009	14 kDa proline-rich protein DC2.15 OS=Daucus carota PE=2 SV=1
	c108808_g1	58.1323	5.86127
	c32256_g1	55.0641	5.78304
	c101540_g1	54.1437	5.75872
	c60822_g2	53.5647	5.74321	Q6WUC1	(RS)-norcoclaurine 6-O-methyltransferase OS=Papaver somniferum GN=PSOMT2 PE=1 SV=1
	c53080_g2	52.2892	5.70844	Q93ZR6	O-acyltransferase WSD1 OS=Arabidopsis thaliana GN=WSD1 PE=2 SV=1
	c16261_g1	49.0078	5.61494	O48928	Cytochrome P450 77A3 OS=Glycine max GN=CYP77A3 PE=2 SV=1
	c43246_g2	48.2388	5.59212	Q94LW6	Probable sulfate transporter 3.5 OS=Arabidopsis thaliana GN=SULTR3;5 PE=2 SV=1
	c23566_g1	45.1477	5.49658	P48625	Omega-3 fatty acid desaturase, endoplasmic reticulum OS=Glycine max GN=FAD3 PE=2 SV=1
	c82835_g1	45.0896	5.49472
	c60637_g1	44.4993	5.47571
	c70861_g1	44.4985	5.47568
	c47686_g1	44.4985	5.47568	Q00451	36.4 kDa proline-rich protein OS=Solanum lycopersicum GN=TPRP-F1 PE=2 SV=1
	c51041_g1	44.3022	5.46931	Q949Z1	Polygalacturonase At1g48100 OS=Arabidopsis thaliana GN=At1g48100 PE=2 SV=1
	c74072_g1	44.2115	5.46635
	c134392_g1	43.8708	5.45519	Q9C7N5	GDSL esterase/lipase At1g29660 OS=Arabidopsis thaliana GN=At1g29660 PE=2 SV=1
	c51041_g2	43.8492	5.45448	Q949Z1	Polygalacturonase At1g48100 OS=Arabidopsis thaliana GN=At1g48100 PE=2 SV=1
	c47633_g4	43.5149	5.44344	Q9SJH0	Transcription factor PAR1 OS=Arabidopsis thaliana GN=PAR1 PE=1 SV=1
	c59028_g2	43.2	5.43296
	c12850_g1	43.2	5.43296
	c51906_g1	42.5508	5.41111	F8WKW1	7-deoxyloganetin glucosyltransferase OS=Gardenia jasminoides GN=UGT85A24 PE=1 SV=1
	c56130_g1	41.9015	5.38893	Q93WC9	Adenylate isopentenyltransferase 3, chloroplastic OS=Arabidopsis thaliana GN=IPT3 PE=1 SV=1
	c47633_g2	40.4118	5.33671
	c57970_g5	40.3317	5.33384	O80622	Expansin-A15 OS=Arabidopsis thaliana GN=EXPA15 PE=2 SV=2
	c48931_g1	39.5438	5.30538	Q9FLV5	Probable peroxidase 61 OS=Arabidopsis thaliana GN=PER61 PE=3 SV=1
	c108455_g1	39.415	5.30067
	c55286_g1	38.6554	5.2726	Q41951	Aquaporin TIP2-1 OS=Arabidopsis thaliana GN=TIP2-1 PE=1 SV=2
	c16146_g1	37.611	5.23308	Q9S728	Protodermal factor 1 OS=Arabidopsis thaliana GN=PDF1 PE=2 SV=1
	c68418_g1	37.1624	5.21577	F8WLS6	7-deoxyloganetin glucosyltransferase OS=Catharanthus roseus GN=UGT85A23 PE=1 SV=1
	c8625_g2	36.2484	5.17985
	c60339_g6	35.9374	5.16741	Q8GW32	Transcription factor PRE6 OS=Arabidopsis thaliana GN=PRE6 PE=1 SV=1
	c48726_g3	35.6418	5.1555
	c45016_g2	35.4092	5.14605
	c93353_g1	34.8794	5.12431	F8WKW1	7-deoxyloganetin glucosyltransferase OS=Gardenia jasminoides GN=UGT85A24 PE=1 SV=1
	c61746_g1	34.76	5.11936
	c111856_g1	34.76	5.11936
	c124042_g1	34.1371	5.09327	F8WLS6	7-deoxyloganetin glucosyltransferase OS=Catharanthus roseus GN=UGT85A23 PE=1 SV=1
	c17022_g1	34.1108	5.09216	Q9SIN1	Inactive TPR repeat-containing thioredoxin TTL3 OS=Arabidopsis thaliana GN=TTL3 PE=1 SV=2
	c138970_g1	34.1108	5.09216	P0CW97	Protein PLANT CADMIUM RESISTANCE 3 OS=Arabidopsis thaliana GN=PCR3 PE=3 SV=1
	c52610_g2	33.3768	5.06078
	c58605_g4	32.8214	5.03656
	c62863_g2	30.8646	4.94788
	c121287_g1	30.352	4.92372	Q9LHE3	Protein ASPARTIC PROTEASE IN GUARD CELL 2 OS=Arabidopsis thaliana GN=ASPG2 PE=2 SV=1
	c62277_g3	30.2154	4.91721	Q9C9Y8	Probable inactive receptor kinase At3g08680 OS=Arabidopsis thaliana GN=At3g08680 PE=1 SV=1
	c5762_g1	30.0937	4.91139	P94040	Germin-like protein subfamily 3 member 1 OS=Arabidopsis thaliana GN=GLP1 PE=1 SV=1
	c49693_g1	29.6989	4.89234
	c773_g1	29.3109	4.87336
	c64851_g1	29.1678	4.86631	Q43716	Anthocyanidin 3-O-glucosyltransferase OS=Petunia hybrida GN=RT PE=2 SV=1
	c40919_g1	28.985	4.85724
	c96510_g1	28.9718	4.85658	Q9FHM9	Protein EXORDIUM-like 3 OS=Arabidopsis thaliana GN=EXL3 PE=2 SV=1
	c39547_g1	28.9169	4.85384	O64640	Probable carboxylesterase 8 OS=Arabidopsis thaliana GN=CXE8 PE=2 SV=1
	c51599_g1	28.5113	4.83346
	c146223_g1	28.3989	4.82776
	c19625_g1	27.7687	4.79539	Q8GT20	Benzyl alcohol O-benzoyltransferase OS=Nicotiana tabacum GN=HSR201 PE=1 SV=1
	c121046_g1	27.6568	4.78956	Q39265	Zinc finger protein 6 OS=Arabidopsis thaliana GN=ZFP6 PE=2 SV=1
	c48926_g1	27.6185	4.78756
	c58126_g5	26.9692	4.75324
	c106543_g1	26.9134	4.75025
	c47378_g2	26.5877	4.73269	Q9M8Y4	Two-component response regulator ARR22 OS=Arabidopsis thaliana GN=ARR22 PE=2 SV=1
	c42370_g1	26.32	4.71809
	c125517_g1	26.198	4.71138	Q9FF77	Probable pectinesterase/pectinesterase inhibitor 47 OS=Arabidopsis thaliana GN=PME47 PE=2 SV=1
	c38846_g1	25.8717	4.6933	Q1A173	Protein RADIALIS-like 6 OS=Arabidopsis thaliana GN=RL6 PE=2 SV=1
	c86915_g1	25.6675	4.68187
	c66002_g1	25.515	4.67327	P39870	Inducible nitrate reductase [NADH] 2 OS=Glycine max GN=INR2 PE=2 SV=1
	c28404_g1	25.4638	4.67037
	c99155_g1	25.4067	4.66714
	c62074_g3	25.2918	4.6606
	c107950_g1	25.2696	4.65933
	c37844_g2	25.1888	4.65471
	c142159_g1	25.0215	4.6451	Q42545	Cell division protein FtsZ homolog 1, chloroplastic OS=Arabidopsis thaliana GN=FTSZ1 PE=1 SV=2
	c79824_g1	25.0215	4.6451	Q6NMR8	Protein FANTASTIC FOUR 3 OS=Arabidopsis thaliana GN=FAF3 PE=2 SV=1
	c7762_g1	25.0131	4.64461	Q9ZR04	Putative cyclin-D6-1 OS=Arabidopsis thaliana GN=CYCD6-1 PE=3 SV=1
	c65348_g1	24.9334	4.64001
	c83543_g1	24.4444	4.61143
	c35372_g1	24.2406	4.59935	Q39127	Ethylene-responsive transcription factor TINY OS=Arabidopsis thaliana GN=TINY PE=2 SV=1
	c133734_g1	24.0877	4.59022	G7K2E3	Survival protein SurE-like phosphatase/nucleotidase OS=Medicago truncatula GN=MTR_5g006290 PE=3 SV=1
	c60347_g5	24.0635	4.58877	I1M5R2	Uncharacterized protein OS=Glycine max GN=GLYMA_13G363000 PE=4 SV=1
	c56835_g1	23.9065	4.57933	Q94AP3	Protein WALLS ARE THIN 1 OS=Arabidopsis thaliana GN=WAT1 PE=1 SV=1
	c61283_g10	23.8321	4.57483	Q9SK91	Transcription factor bHLH94 OS=Arabidopsis thaliana GN=BHLH94 PE=2 SV=2
	c18276_g1	23.7231	4.56822
	c52285_g4	23.7231	4.56822
	c53378_g1	23.7231	4.56822	Q9LQP8	3-ketoacyl-CoA synthase 3 OS=Arabidopsis thaliana GN=KCS3 PE=2 SV=3
	c29645_g1	23.7231	4.56822
	c134377_g1	23.4941	4.55423	Q8S9G6	Taxadien-5-alpha-ol O-acetyltransferase OS=Taxus wallichiana var. chinensis PE=2 SV=1
	c49304_g1	23.4384	4.5508
	c120446_g1	23.3589	4.5459	Q9SS03	Dirigent protein 21 OS=Arabidopsis thaliana GN=DIR21 PE=3 SV=1
	c14748_g2	23.3146	4.54316
	c64861_g1	23.1391	4.53226	Q8VYZ3	Probable pectinesterase 53 OS=Arabidopsis thaliana GN=PME53 PE=2 SV=1
	c55293_g1	23.0739	4.52819	Q8LFN2	Probable inactive leucine-rich repeat receptor-like protein kinase At3g03770 OS=Arabidopsis thaliana GN=At3g03770 PE=2 SV=1
	c23459_g1	23.0739	4.52819	Q949Z1	Polygalacturonase At1g48100 OS=Arabidopsis thaliana GN=At1g48100 PE=2 SV=1
	c43992_g1	23.0739	4.52819
	c81030_g1	23.0739	4.52819
	c48726_g1	23.0448	4.52637
	c54639_g1	22.598	4.49812	Q9ZPY2	Laccase-6 OS=Arabidopsis thaliana GN=LAC6 PE=2 SV=1
	c44183_g1	22.5364	4.49419	Q9M8Z8	Probable pectate lyase 8 OS=Arabidopsis thaliana GN=At3g07010 PE=2 SV=1
	c55199_g2	22.4846	4.49087	Q5XF57	Probable receptor-like serine/threonine-protein kinase At5g57670 OS=Arabidopsis thaliana GN=At5g57670 PE=2 SV=1
	c134535_g1	22.4595	4.48925	P39870	Inducible nitrate reductase [NADH] 2 OS=Glycine max GN=INR2 PE=2 SV=1
	c48557_g2	22.4246	4.48701	Q6NMR8	Protein FANTASTIC FOUR 3 OS=Arabidopsis thaliana GN=FAF3 PE=2 SV=1
	c44460_g1	22.2575	4.47622
	c49629_g3	22.2402	4.4751
	c44273_g1	22.1847	4.4715	Q9C7N5	GDSL esterase/lipase At1g29660 OS=Arabidopsis thaliana GN=At1g29660 PE=2 SV=1
	c47846_g1	22.1441	4.46885	O82316	Aquaporin TIP4-1 OS=Arabidopsis thaliana GN=TIP4-1 PE=2 SV=1
	c56114_g2	22.0867	4.46511	Q9LZL3	Aspartic proteinase PCS1 OS=Arabidopsis thaliana GN=PCS1 PE=2 SV=1
	c25650_g1	22.0395	4.46202	O22264	Transcription factor MYB12 OS=Arabidopsis thaliana GN=MYB12 PE=2 SV=1
	c50342_g1	21.9813	4.45821	Q766C3	Aspartic proteinase nepenthesin-1 OS=Nepenthes gracilis GN=nep1 PE=1 SV=1
	c51454_g1	21.8638	4.45047
	c60006_g1	21.8496	4.44953	P54768	Tyrosine/DOPA decarboxylase 1 OS=Papaver somniferum GN=TYDC1 PE=2 SV=1
	c54992_g3	21.6493	4.43625	Q8L8Q3	LOB domain-containing protein 25 OS=Arabidopsis thaliana GN=LBD25 PE=2 SV=3
	c27471_g1	21.6198	4.43428	Q7XU38	Cytochrome P450 87A3 OS=Oryza sativa subsp. japonica GN=CYP87A3 PE=2 SV=3
	c34980_g1	21.5721	4.4311	Q93VR4	MLP-like protein 423 OS=Arabidopsis thaliana GN=MLP423 PE=2 SV=1
	c38480_g1	21.3993	4.41949	O80674	Transcription factor bHLH106 OS=Arabidopsis thaliana GN=BHLH106 PE=2 SV=1
	c47633_g5	21.291	4.41217	Q9SJH0	Transcription factor PAR1 OS=Arabidopsis thaliana GN=PAR1 PE=1 SV=1
	c8625_g1	21.2278	4.40788	Q00451	36.4 kDa proline-rich protein OS=Solanum lycopersicum GN=TPRP-F1 PE=2 SV=1
	c104640_g1	21.1262	4.40096
	c4770_g1	21.1262	4.40096	Q8GYT9	E3 ubiquitin-protein ligase SIS3 OS=Arabidopsis thaliana GN=SIS3 PE=2 SV=2
	c54525_g1	21.1262	4.40096
	c40424_g1	21.0428	4.39525	Q7Y208	Glycerophosphodiester phosphodiesterase GDPDL1 OS=Arabidopsis thaliana GN=GDPDL1 PE=1 SV=2
	c24549_g1	20.7059	4.37197	Q948Z4	Snakin-1 OS=Solanum tuberosum GN=SN1 PE=1 SV=1
	c5393_g1	20.6828	4.37036	Q9LDA4	Peroxidase 38 OS=Arabidopsis thaliana GN=PER38 PE=3 SV=1
	c138314_g1	20.5544	4.36137	Q9FL16	Peroxidase 63 OS=Arabidopsis thaliana GN=PER63 PE=2 SV=1
	c47822_g1	20.49	4.35685	Q39131	Lamin-like protein OS=Arabidopsis thaliana GN=At5g15350 PE=1 SV=1
	c52941_g1	20.4769	4.35593	Q29PU4	CLAVATA3/ESR (CLE)-related protein 12 OS=Arabidopsis thaliana GN=CLE12 PE=2 SV=1
	c100006_g1	20.4769	4.35593
	c49090_g1	20.4769	4.35593	P37707	B2 protein OS=Daucus carota PE=2 SV=1
	c65031_g1	20.3131	4.34434	O48780	3-ketoacyl-CoA synthase 11 OS=Arabidopsis thaliana GN=KCS11 PE=2 SV=1
	c61746_g6	20.2075	4.33682	Q94BT9	Copper transport protein ATX1 OS=Arabidopsis thaliana GN=ATX1 PE=1 SV=1
	c97870_g1	20.1618	4.33355
	c9095_g1	20.103	4.32934
	c78171_g1	20.0431	4.32504
	c62762_g7	19.9384	4.31748	Q9S7Y1	Transcription factor bHLH30 OS=Arabidopsis thaliana GN=BHLH30 PE=1 SV=1
	c45221_g1	19.925	4.31651
	c128278_g1	19.8277	4.30945	Q9FJV7	Calcium uniporter protein 4, mitochondrial OS=Arabidopsis thaliana GN=At5g42610 PE=2 SV=1
	c41459_g1	19.8277	4.30945
	c14905_g2	19.8277	4.30945	Q9M817	Protein NRT1/ PTR FAMILY 1.2 OS=Arabidopsis thaliana GN=NPF1.2 PE=1 SV=1
	c62673_g2	19.8277	4.30945
	c53515_g1	19.7625	4.3047
	c125340_g1	19.685	4.29902
	c43309_g1	19.6577	4.29702	P54233	Inducible nitrate reductase [NADH] 1 OS=Glycine max GN=INR1 PE=2 SV=1
	c56546_g1	19.6176	4.29408
	c39050_g1	19.5576	4.28966	Q9LMA1	Probable flavin-containing monooxygenase 1 OS=Arabidopsis thaliana GN=FMO1 PE=2 SV=1
	c45688_g1	19.3601	4.27502
	c54957_g2	19.3017	4.27066	Q69F95	Cytochrome P450 85A OS=Phaseolus vulgaris GN=BA13 PE=3 SV=2
	c48268_g1	19.1785	4.26142
	c16919_g1	19.1785	4.26142	B8XCH5	Protein QUIRKY OS=Arabidopsis thaliana GN=QKY PE=2 SV=1
	c21608_g1	19.1785	4.26142
	c14905_g1	19.1785	4.26142	Q9M817	Protein NRT1/ PTR FAMILY 1.2 OS=Arabidopsis thaliana GN=NPF1.2 PE=1 SV=1
	c61427_g1	19.1717	4.26091	Q9FJD5	Laccase-17 OS=Arabidopsis thaliana GN=LAC17 PE=2 SV=1
	c61804_g2	19.0605	4.25252	Q9M6E2	10-deacetylbaccatin III 10-O-acetyltransferase OS=Taxus cuspidata PE=1 SV=1
	c66270_g1	18.9033	4.24056	Q9S7X6	Thermospermine synthase ACAULIS5 OS=Arabidopsis thaliana GN=ACL5 PE=1 SV=1
	c78622_g1	18.7641	4.2299	Q9SU35	pEARLI1-like lipid transfer protein 1 OS=Arabidopsis thaliana GN=AZI1 PE=1 SV=1
	c60766_g6	18.6959	4.22465	Q6K4V2	Bidirectional sugar transporter SWEET4 OS=Oryza sativa subsp. japonica GN=SWEET4 PE=2 SV=1
	c15157_g1	18.6584	4.22175
	c49822_g1	18.5292	4.21173
	c55853_g3	18.5292	4.21173
	c55308_g7	18.5292	4.21173
	c137340_g1	18.5292	4.21173
	c53265_g1	18.5292	4.21173
	c77190_g1	18.5292	4.21173
	c110364_g1	18.5047	4.20982
	c60407_g1	18.5023	4.20963	Q8W453	Putative lipid-transfer protein DIR1 OS=Arabidopsis thaliana GN=DIR1 PE=1 SV=1
	c54192_g2	18.3332	4.19639	P17772	Organ-specific protein S2 OS=Pisum sativum PE=2 SV=1
	c1646_g1	18.3209	4.19542
	c60981_g12	18.3209	4.19542
	c38402_g2	18.3209	4.19542	Q9C7T4	Transcription factor bHLH96 OS=Arabidopsis thaliana GN=BHLH96 PE=2 SV=1
	c79039_g1	18.2303	4.18826
	c55117_g3	18.1471	4.18167	Q9FJ45	GDSL esterase/lipase At5g45910 OS=Arabidopsis thaliana GN=At5g45910 PE=2 SV=1
	c24203_g1	18.1246	4.17988
	c2187_g1	17.9593	4.16666
	c78338_g1	17.9593	4.16666
	c57357_g2	17.9478	4.16573	Q9LZR3	Glucomannan 4-beta-mannosyltransferase 9 OS=Arabidopsis thaliana GN=CSLA9 PE=2 SV=1
	c58392_g1	17.8992	4.16183	B9G9L9	BURP domain-containing protein 17 OS=Oryza sativa subsp. japonica GN=BURP17 PE=2 SV=1
	c51308_g2	17.88	4.16028	Q9LY00	Probable WRKY transcription factor 70 OS=Arabidopsis thaliana GN=WRKY70 PE=2 SV=1
	c24111_g1	17.88	4.16028
	c15270_g1	17.88	4.16028	Q9ZR04	Putative cyclin-D6-1 OS=Arabidopsis thaliana GN=CYCD6-1 PE=3 SV=1
	c59768_g2	17.7921	4.15317	Q9STM6	GDSL esterase/lipase At3g48460 OS=Arabidopsis thaliana GN=At3g48460 PE=2 SV=1
	c57790_g7	17.5673	4.13482
	c59211_g4	17.5336	4.13205	Q6EPP9	Growth-regulating factor 10 OS=Oryza sativa subsp. japonica GN=GRF10 PE=2 SV=1
	c51263_g1	17.5188	4.13083	Q9SQZ0	Cationic amino acid transporter 7, chloroplastic OS=Arabidopsis thaliana GN=CAT7 PE=3 SV=1
	c120772_g1	17.4736	4.12711	Q9M353	Cation/H(+) antiporter 20 OS=Arabidopsis thaliana GN=CHX20 PE=2 SV=1
	c51837_g2	17.4703	4.12684	Q93X17	Snakin-2 OS=Solanum tuberosum GN=SN2 PE=1 SV=1
	c56559_g1	17.4252	4.1231	Q9LXD9	Probable pectinesterase/pectinesterase inhibitor 51 OS=Arabidopsis thaliana GN=PME51 PE=2 SV=1
	c16844_g1	17.3929	4.12043	Q40374	Pathogenesis-related protein PR-1 OS=Medicago truncatula GN=PR-1 PE=2 SV=1
	c54107_g2	17.3758	4.11901	Q9SZN7	Heavy metal-associated isoprenylated plant protein 26 OS=Arabidopsis thaliana GN=HIPP26 PE=1 SV=1
	c44183_g2	17.3517	4.11701	Q9LJ42	Probable pectate lyase 10 OS=Arabidopsis thaliana GN=At3g24670 PE=2 SV=2
	c63390_g12	17.2995	4.11266
	c18833_g1	17.2985	4.11258	O80339	Ethylene-responsive transcription factor 3 OS=Arabidopsis thaliana GN=ERF3 PE=1 SV=1
	c56114_g1	17.2447	4.10808	Q9LZL3	Aspartic proteinase PCS1 OS=Arabidopsis thaliana GN=PCS1 PE=2 SV=1
	c57004_g4	17.2308	4.10692	A7PZL3	Probable polygalacturonase OS=Vitis vinifera GN=GSVIVT00026920001 PE=1 SV=1
	c43712_g2	17.2308	4.10692
	c45772_g1	17.2308	4.10692
	c62151_g10	17.2308	4.10692
	c20037_g1	17.2308	4.10692
	c62267_g3	17.2308	4.10692
	c61811_g1	17.1427	4.09952	O48711	Probable pectinesterase/pectinesterase inhibitor 12 OS=Arabidopsis thaliana GN=PME12 PE=2 SV=1
	c122690_g1	17.1399	4.09929	Q9ZSY9	Linolenate hydroperoxide lyase, chloroplastic OS=Arabidopsis thaliana GN=CYP74B2 PE=1 SV=1
	c62273_g2	17.1099	4.09676	V7B5W5	Uncharacterized protein OS=Phaseolus vulgaris GN=PHAVU_008G174100g PE=4 SV=1
	c54107_g5	17.0783	4.09409
	c15973_g1	17.0773	4.09401	Q93VR4	MLP-like protein 423 OS=Arabidopsis thaliana GN=MLP423 PE=2 SV=1
	c63390_g13	16.9866	4.08632
	c51824_g4	16.9443	4.08273	O24543	Auxin-induced protein 22E OS=Vigna radiata var. radiata GN=AUX22E PE=2 SV=1
	c37522_g1	16.9051	4.07939	Q9LHE3	Protein ASPARTIC PROTEASE IN GUARD CELL 2 OS=Arabidopsis thaliana GN=ASPG2 PE=2 SV=1
	c83253_g1	16.7463	4.06577	Q9FZP1	Heparanase-like protein 3 OS=Arabidopsis thaliana GN=At5g34940 PE=2 SV=2
	c39867_g1	16.7463	4.06577	O82089	Copper transport protein CCH OS=Arabidopsis thaliana GN=CCH PE=1 SV=1
	c115022_g1	16.7463	4.06577	Q9FII5	Leucine-rich repeat receptor-like protein kinase TDR OS=Arabidopsis thaliana GN=TDR PE=1 SV=1
	c120757_g1	16.6519	4.05761	Q39231	Sucrose transport protein SUC2 OS=Arabidopsis thaliana GN=SUC2 PE=1 SV=2
	c45016_g1	16.5815	4.05151	Q93VK8	Root meristem growth factor 6 OS=Arabidopsis thaliana GN=RGF6 PE=3 SV=1
	c50114_g1	16.5815	4.05151	A0A151RQ34	Retrotransposable element Tf2 OS=Cajanus cajan GN=KK1_033819 PE=4 SV=1
	c37844_g1	16.5473	4.04852
	c18322_g1	16.5355	4.04749
	c33358_g2	16.5271	4.04676	Q03411	Sucrose transport protein OS=Spinacia oleracea PE=2 SV=1
	c78231_g1	16.4566	4.0406
	c41894_g1	16.3526	4.03145	Q84KP0	Bifunctional dihydroflavonol 4-reductase/flavanone 4-reductase OS=Pyrus communis GN=DFR PE=1 SV=1
	c139907_g1	16.3483	4.03107	Q9SSK5	MLP-like protein 43 OS=Arabidopsis thaliana GN=MLP43 PE=1 SV=1
	c106597_g1	16.253	4.02264	Q9S7X6	Thermospermine synthase ACAULIS5 OS=Arabidopsis thaliana GN=ACL5 PE=1 SV=1
	c34042_g1	16.253	4.02264
	c68567_g1	16.1994	4.01787
	c66624_g1	16.14	4.01257
	c120631_g1	16.1293	4.01161	O50001	Major allergen Pru ar 1 OS=Prunus armeniaca PE=1 SV=1
	c58481_g1	16.0987	4.00887	O80366	Two-component response regulator ARR9 OS=Arabidopsis thaliana GN=ARR9 PE=1 SV=1
	c62634_g1	16.0479	4.00432	Q67YU0	Cytokinin dehydrogenase 5 OS=Arabidopsis thaliana GN=CKX5 PE=2 SV=1
	c57280_g3	16.0303	4.00273	Q9XI33	Ethylene-responsive transcription factor WIN1 OS=Arabidopsis thaliana GN=WIN1 PE=2 SV=1
	c59848_g2	15.9933	3.99939
	c134834_g1	15.9901	3.99911	Q00451	36.4 kDa proline-rich protein OS=Solanum lycopersicum GN=TPRP-F1 PE=2 SV=1
	c33807_g2	15.9862	3.99875
	c54957_g3	15.977	3.99793	Q69F95	Cytochrome P450 85A OS=Phaseolus vulgaris GN=BA13 PE=3 SV=2
	c136197_g1	15.9323	3.99388
	c80384_g1	15.9323	3.99388
	c36460_g2	15.9323	3.99388	Q8RWU4	Homeobox-leucine zipper protein MERISTEM L1 OS=Arabidopsis thaliana GN=ATML1 PE=2 SV=1
	c40014_g1	15.9323	3.99388	Q93X17	Snakin-2 OS=Solanum tuberosum GN=SN2 PE=1 SV=1
	c31424_g1	15.9323	3.99388
	c43848_g1	15.9145	3.99227	D4Q9Z4	Soyasapogenol B glucuronide galactosyltransferase OS=Glycine max GN=GmSGT2 PE=1 SV=1
	c93506_g1	15.8393	3.98544	O23038	Probable pectinesterase 8 OS=Arabidopsis thaliana GN=PME8 PE=2 SV=2
	c47076_g1	15.7568	3.9779	Q9ZWA1	Zinc finger CCCH domain-containing protein 2 OS=Arabidopsis thaliana GN=At1g03790 PE=2 SV=1
	c83947_g1	15.6881	3.9716	D4Q9Z5	Soyasaponin III rhamnosyltransferase OS=Glycine max GN=GmSGT3 PE=1 SV=1
	c3753_g2	15.6746	3.97036	P46417	Glutathione S-transferase 3 OS=Glycine max GN=GST3 PE=1 SV=1
	c33360_g1	15.5746	3.96112	Q84WS0	Subtilisin-like protease SBT1.1 OS=Arabidopsis thaliana GN=SBTI1.1 PE=1 SV=1
	c106834_g1	15.5653	3.96026	Q96324	Glutathione S-transferase F11 OS=Arabidopsis thaliana GN=GSTF11 PE=2 SV=1
	c48522_g1	15.5653	3.96026	A0ZZ76	50S ribosomal protein L2, chloroplastic OS=Gossypium barbadense GN=rpl2-A PE=3 SV=1
	c62139_g5	15.5422	3.95812	O81301	Probable pectinesterase/pectinesterase inhibitor 40 OS=Arabidopsis thaliana GN=PME40 PE=2 SV=1
	c42610_g1	15.5365	3.95759
	c54192_g1	15.4735	3.95173	P17772	Organ-specific protein S2 OS=Pisum sativum PE=2 SV=1
	c89555_g1	15.4272	3.9474	Q84RL7	Aquaporin PIP2-1 OS=Zea mays GN=PIP2-1 PE=1 SV=2
	c121810_g1	15.4056	3.94539	Q27GI3	Nucleobase-ascorbate transporter 6 OS=Arabidopsis thaliana GN=NAT6 PE=2 SV=2
	c59862_g1	15.4023	3.94508	A0A151R5J8	Retrotransposable element Tf2 OS=Cajanus cajan GN=KK1_041028 PE=4 SV=1
	c106275_g1	15.3163	3.93699	Q9FLX5	ABC transporter G family member 8 OS=Arabidopsis thaliana GN=ABCG8 PE=2 SV=1
	c60616_g1	15.3159	3.93696	Q9ZVC7	Xylogen-like protein 11 OS=Arabidopsis thaliana GN=XYP11 PE=1 SV=2
	c26717_g1	15.2831	3.93386	Q9LS40	Protein ASPARTIC PROTEASE IN GUARD CELL 1 OS=Arabidopsis thaliana GN=ASPG1 PE=1 SV=1
	c84087_g1	15.2831	3.93386	Q84KJ6	Ammonium transporter 3 member 1 OS=Oryza sativa subsp. japonica GN=AMT3-1 PE=2 SV=1
	c94132_g1	15.2831	3.93386
	c64767_g1	15.2831	3.93386	F4JIF4	Protein NETWORKED 1B OS=Arabidopsis thaliana GN=NET1B PE=2 SV=1
	c48743_g1	15.2831	3.93386	P23472	Hevamine-A OS=Hevea brasiliensis PE=1 SV=2
	c49450_g3	15.2831	3.93386	O48947	Cellulose synthase A catalytic subunit 2 [UDP-forming] OS=Arabidopsis thaliana GN=CESA2 PE=1 SV=1
	c85966_g1	15.2311	3.92895
	c44664_g1	15.1716	3.92331	A7QEU4	Peroxidase 5 OS=Vitis vinifera GN=GSVIVT00037159001 PE=1 SV=2
	c62274_g6	15.1355	3.91987	Q9S7X6	Thermospermine synthase ACAULIS5 OS=Arabidopsis thaliana GN=ACL5 PE=1 SV=1
	c58540_g1	15.1232	3.91869	Q3E9D5	S-adenosylmethionine decarboxylase proenzyme 4 OS=Arabidopsis thaliana GN=SAMDC4 PE=1 SV=1
	c51635_g1	15.1232	3.91869	Q9CAH1	Putative receptor-like protein kinase At1g72540 OS=Arabidopsis thaliana GN=At1g72540 PE=2 SV=1
	c23630_g1	15.1232	3.91869	Q8LDI5	Thioredoxin-like protein CXXS1 OS=Arabidopsis thaliana GN=CXXS1 PE=2 SV=2
	c8573_g1	15.0378	3.91052	P24068	Ocs element-binding factor 1 OS=Zea mays GN=OBF1 PE=2 SV=2
	c86391_g1	14.9547	3.90253	P19456	ATPase 2, plasma membrane-type OS=Arabidopsis thaliana GN=AHA2 PE=1 SV=2
	c114884_g1	14.8982	3.89707
	c8357_g1	14.8758	3.89489
	c92503_g1	14.834	3.89084
	c57024_g5	14.7951	3.88704	P46690	Gibberellin-regulated protein 4 OS=Arabidopsis thaliana GN=GASA4 PE=1 SV=2
	c55153_g4	14.778	3.88538
	c45233_g1	14.7609	3.88371
	c40558_g1	14.6555	3.87337
	c48726_g2	14.6338	3.87124	Q00451	36.4 kDa proline-rich protein OS=Solanum lycopersicum GN=TPRP-F1 PE=2 SV=1
	c46233_g1	14.6338	3.87124
	c37935_g2	14.6338	3.87124
	c59028_g3	14.6338	3.87124
	c104664_g1	14.6338	3.87124	O23147	Polygalacturonase ADPG1 OS=Arabidopsis thaliana GN=ADPG1 PE=2 SV=1
	c2332_g1	14.6338	3.87124
	c38994_g1	14.6338	3.87124	Q8W2F1	Transcription factor MYC1 OS=Arabidopsis thaliana GN=BHLH12 PE=1 SV=1
	c59225_g1	14.6276	3.87062
	c55747_g3	14.4766	3.85565	Q9LTS3	Cytokinin dehydrogenase 3 OS=Arabidopsis thaliana GN=CKX3 PE=1 SV=1
	c36446_g1	14.4312	3.85112	Q9SUQ2	Ethylene-responsive transcription factor CRF2 OS=Arabidopsis thaliana GN=CRF2 PE=1 SV=1
	c49629_g1	14.3977	3.84777
	c54032_g3	14.3968	3.84768
	c60446_g1	14.3947	3.84747
	c65261_g1	14.3843	3.84643	Q9T076	Early nodulin-like protein 2 OS=Arabidopsis thaliana GN=At4g27520 PE=1 SV=1
	c51131_g1	14.3606	3.84404	O80959	Patatin-like protein 6 OS=Arabidopsis thaliana GN=PLP6 PE=2 SV=1
	c61722_g6	14.3022	3.83816	P28523	Casein kinase II subunit alpha OS=Zea mays GN=ACK2 PE=1 SV=1
	c28822_g1	14.2795	3.83587
	c26122_g2	14.2758	3.8355	Q6NQG7	RING-H2 finger protein ATL78 OS=Arabidopsis thaliana GN=ATL78 PE=2 SV=1
	c45846_g2	14.2758	3.8355	Q03411	Sucrose transport protein OS=Spinacia oleracea PE=2 SV=1
	c31339_g1	14.27	3.83491	I1KND7	Uncharacterized protein OS=Glycine max GN=GLYMA_07G261200 PE=4 SV=2
	c59220_g3	14.2198	3.82983	Q9SZM1	Expansin-A20 OS=Arabidopsis thaliana GN=EXPA20 PE=2 SV=1
	c11718_g1	14.2145	3.82929	Q9SZN7	Heavy metal-associated isoprenylated plant protein 26 OS=Arabidopsis thaliana GN=HIPP26 PE=1 SV=1
	c61831_g2	14.1826	3.82605	O48927	Cytochrome P450 78A3 OS=Glycine max GN=CYP78A3 PE=2 SV=1
	c35434_g1	14.1713	3.8249	B9GXD6	CASP-like protein 3A1 OS=Populus trichocarpa GN=POPTRDRAFT_553757 PE=3 SV=2
	c64428_g1	14.0801	3.81558	Q53UH4	Anthocyanidin 3-O-glucoside 2''-O-glucosyltransferase OS=Ipomoea nil GN=3GGT PE=1 SV=1
	c137109_g1	14.0745	3.81501
	c59502_g2	13.9996	3.80731	Q84VY3	Acyl-[acyl-carrier-protein] desaturase 6, chloroplastic OS=Arabidopsis thaliana GN=S-ACP-DES6 PE=2 SV=2
	c49372_g2	13.9975	3.8071	Q94KD8	Probable beta-D-xylosidase 2 OS=Arabidopsis thaliana GN=BXL2 PE=2 SV=1
	c55894_g1	13.9975	3.8071	P80074	Myb-related protein Pp1 (Fragment) OS=Physcomitrella patens subsp. patens GN=PP1 PE=2 SV=1
	c57992_g1	13.9907	3.80639	Q8RXR6	BTB/POZ domain-containing protein At1g50280 OS=Arabidopsis thaliana GN=At1g50280 PE=2 SV=1
	c57299_g2	13.9907	3.80639
	c60228_g3	13.9846	3.80577	Q9SWI1	Protein PHYTOCHROME KINASE SUBSTRATE 1 OS=Arabidopsis thaliana GN=PKS1 PE=1 SV=2
	c19457_g1	13.9846	3.80577	Q9LTT3	High mobility group B protein 10 OS=Arabidopsis thaliana GN=HMGB10 PE=2 SV=1
	c139258_g1	13.9846	3.80577
	c23958_g1	13.9846	3.80577
	c47822_g2	13.9846	3.80577
	c58479_g2	13.9846	3.80577	Q8LF99	Probable xyloglucan endotransglucosylase/hydrolase protein 6 OS=Arabidopsis thaliana GN=XTH6 PE=2 SV=2
	c135429_g1	13.9846	3.80577
	c88549_g1	13.9846	3.80577
	c106517_g1	13.9627	3.80351	P17407	21 kDa protein OS=Daucus carota PE=2 SV=1
	c60347_g8	13.9341	3.80055	A0A0B2SBN4	Acyl-protein thioesterase 2 OS=Glycine soja GN=glysoja_031817 PE=4 SV=1
	c60339_g8	13.7953	3.7861	Q8GW32	Transcription factor PRE6 OS=Arabidopsis thaliana GN=PRE6 PE=1 SV=1
	c58035_g3	13.792	3.78576	Q9LS40	Protein ASPARTIC PROTEASE IN GUARD CELL 1 OS=Arabidopsis thaliana GN=ASPG1 PE=1 SV=1
	c66890_g1	13.7892	3.78546
	c51824_g1	13.7879	3.78533	O24542	Auxin-induced protein 22D OS=Vigna radiata var. radiata GN=AUX22D PE=2 SV=1
	c58540_g5	13.7745	3.78393	Q3E9D5	S-adenosylmethionine decarboxylase proenzyme 4 OS=Arabidopsis thaliana GN=SAMDC4 PE=1 SV=1
	c61340_g12	13.7745	3.78393	I1N462	Subtilisin-like protease Glyma18g48580 OS=Glycine max GN=Glyma18g48580 PE=1 SV=3
	c68927_g1	13.7567	3.78207
	c58186_g2	13.7283	3.77908	Q8LB81	GDSL esterase/lipase At5g33370 OS=Arabidopsis thaliana GN=At5g33370 PE=2 SV=1
	c110883_g1	13.7108	3.77725	O48928	Cytochrome P450 77A3 OS=Glycine max GN=CYP77A3 PE=2 SV=1
	c64502_g1	13.7011	3.77622	O23522	Phospholipase A1-Ibeta2, chloroplastic OS=Arabidopsis thaliana GN=At4g16820 PE=1 SV=2
	c58613_g3	13.6415	3.76993	Q8RWW0	Receptor-like serine/threonine-protein kinase ALE2 OS=Arabidopsis thaliana GN=ALE2 PE=1 SV=1
	c60826_g3	13.597	3.76522	Q9LFE4	WEB family protein At5g16730, chloroplastic OS=Arabidopsis thaliana GN=At5g16730 PE=1 SV=1
	c49546_g1	13.597	3.76522	Q9FZ22	Probable glycerol-3-phosphate acyltransferase 2 OS=Arabidopsis thaliana GN=GPAT2 PE=2 SV=1
	c49629_g2	13.565	3.76182	Q00451	36.4 kDa proline-rich protein OS=Solanum lycopersicum GN=TPRP-F1 PE=2 SV=1
	c58186_g1	13.5064	3.75557	Q8LB81	GDSL esterase/lipase At5g33370 OS=Arabidopsis thaliana GN=At5g33370 PE=2 SV=1
	c55747_g1	13.4664	3.75129	Q9LTS3	Cytokinin dehydrogenase 3 OS=Arabidopsis thaliana GN=CKX3 PE=1 SV=1
	c61739_g3	13.4397	3.74843	Q8L9A9	Probable xyloglucan endotransglucosylase/hydrolase protein 8 OS=Arabidopsis thaliana GN=XTH8 PE=2 SV=2
	c54070_g3	13.4339	3.74781	Q58FS3	Transcription factor RADIALIS OS=Antirrhinum majus GN=RAD PE=1 SV=1
	c53407_g1	13.4285	3.74723	Q9SRK7	Adenine/guanine permease AZG1 OS=Arabidopsis thaliana GN=AZG1 PE=2 SV=1
	c57024_g8	13.3354	3.73719
	c79536_g1	13.3354	3.73719
	c55853_g2	13.3354	3.73719
	c70757_g1	13.3354	3.73719
	c38064_g2	13.3354	3.73719
	c42205_g1	13.3354	3.73719
	c96980_g1	13.3338	3.73701	Q9SUM5	Uncharacterized protein At4g30180 OS=Arabidopsis thaliana GN=At4g30180 PE=2 SV=1
	c56562_g1	13.3245	3.73601	P42753	Cyclin-D3-1 OS=Arabidopsis thaliana GN=CYCD3-1 PE=1 SV=3
	c61804_g1	13.2469	3.72758	Q8LL69	3'-N-debenzoyl-2'-deoxytaxol N-benzoyltransferase OS=Taxus canadensis GN=TAX10 PE=1 SV=1
	c130782_g1	13.231	3.72585	Q9FIG7	Dirigent protein 2 OS=Arabidopsis thaliana GN=DIR2 PE=2 SV=1
	c110122_g1	13.2181	3.72444	Q84VY3	Acyl-[acyl-carrier-protein] desaturase 6, chloroplastic OS=Arabidopsis thaliana GN=S-ACP-DES6 PE=2 SV=2
	c59670_g2	13.2062	3.72315	Q9SZN7	Heavy metal-associated isoprenylated plant protein 26 OS=Arabidopsis thaliana GN=HIPP26 PE=1 SV=1
	c23730_g1	13.2034	3.72283
	c32123_g1	13.2034	3.72283	P32293	Auxin-induced protein 22A OS=Vigna radiata var. radiata GN=AUX22A PE=2 SV=1
	c56321_g1	13.1776	3.72001	Q8LBQ7	Ethylene-responsive transcription factor ERF034 OS=Arabidopsis thaliana GN=ERF034 PE=2 SV=2
	c106788_g1	13.0932	3.71075	Q9C8X2	Sucrose transport protein SUC5 OS=Arabidopsis thaliana GN=SUC5 PE=1 SV=1
	c44460_g2	13.0932	3.71075
	c107106_g1	13.093	3.71073
	c124699_g1	13.0806	3.70935
	c63719_g2	13.0541	3.70644	A0A151SQW2	3-oxoacyl-[acyl-carrier-protein] reductase OS=Cajanus cajan GN=KK1_003433 PE=4 SV=1
	c56150_g1	13.049	3.70587	Q8LC79	GATA transcription factor 18 OS=Arabidopsis thaliana GN=GATA18 PE=2 SV=2
	c27183_g1	13.0229	3.70298
	c52298_g1	12.9359	3.69331
	c58059_g1	12.9338	3.69308	Q9ZRA4	Auxin-binding protein ABP19a OS=Prunus persica GN=ABP19A PE=3 SV=1
	c54885_g1	12.9127	3.69072
	c128028_g1	12.8935	3.68858
	c135946_g1	12.8635	3.68521	P33079	Auxin-induced protein 10A5 OS=Glycine max PE=2 SV=1
	c54326_g1	12.8635	3.68521	P17772	Organ-specific protein S2 OS=Pisum sativum PE=2 SV=1
	c107473_g1	12.8584	3.68464
	c50255_g1	12.8291	3.68135	Q66GM8	Pectin acetylesterase 10 OS=Arabidopsis thaliana GN=PAE10 PE=2 SV=1
	c58606_g3	12.8257	3.68097
	c45621_g1	12.8123	3.67946
	c47850_g2	12.8097	3.67917
	c14748_g1	12.7644	3.67405
	c54534_g1	12.6862	3.66518
	c2884_g1	12.6862	3.66518
	c33167_g1	12.6862	3.66518	A0A151QNK8	Uncharacterized protein OS=Cajanus cajan GN=KK1_047566 PE=4 SV=1
	c52334_g1	12.6862	3.66518
	c76735_g1	12.6862	3.66518
	c13057_g1	12.6862	3.66518
	c96347_g1	12.6862	3.66518	O81270	Peroxygenase 1 OS=Arabidopsis thaliana GN=PXG1 PE=1 SV=1
	c60808_g4	12.6862	3.66518	Q9T050	SPX domain-containing membrane protein At4g11810 OS=Arabidopsis thaliana GN=At4g11810 PE=3 SV=1
	c65967_g1	12.6862	3.66518
	c7901_g1	12.6862	3.66518
	c62846_g14	12.6733	3.66372
	c54588_g1	12.6695	3.66329	Q39110	Gibberellin 20 oxidase 1 OS=Arabidopsis thaliana GN=GA20OX1 PE=2 SV=2
	c13365_g1	12.6399	3.65992	Q03211	Pistil-specific extensin-like protein OS=Nicotiana tabacum PE=2 SV=1
	c44183_g3	12.6203	3.65767	Q93WF1	Probable pectate lyase 20 OS=Arabidopsis thaliana GN=At5g48900 PE=2 SV=1
	c53762_g3	12.6203	3.65767	Q8GWK7	Transcription factor BEE 3 OS=Arabidopsis thaliana GN=BEE3 PE=2 SV=1
	c109883_g1	12.6203	3.65767
	c59848_g1	12.617	3.6573
	c134500_g1	12.5544	3.65012	D4Q9Z4	Soyasapogenol B glucuronide galactosyltransferase OS=Glycine max GN=GmSGT2 PE=1 SV=1
	c115352_g1	12.5518	3.64982
	c56146_g1	12.5356	3.64796	Q07469	Bark storage protein A OS=Populus deltoides GN=BSPA PE=2 SV=1
	c344_g1	12.5299	3.64731	Q9LNU1	CO(2)-response secreted protease OS=Arabidopsis thaliana GN=CRSP PE=2 SV=1
	c22226_g1	12.5283	3.64712	Q9SV31	Probable aquaporin PIP2-5 OS=Arabidopsis thaliana GN=PIP2-5 PE=1 SV=1
	c2527_g1	12.5097	3.64498
	c62516_g11	12.4802	3.64157	Q9M205	Cyclin-U2-2 OS=Arabidopsis thaliana GN=CYCU2-2 PE=1 SV=1
	c53821_g1	12.4781	3.64132	O49523	Phospholipase A1-IIgamma OS=Arabidopsis thaliana GN=DSEL PE=1 SV=1
	c46400_g2	12.453	3.63842	Q9M306	Probable protein S-acyltransferase 5 OS=Arabidopsis thaliana GN=PAT05 PE=1 SV=2
	c45399_g1	12.416	3.63413	Q9LYW0	BTB/POZ domain-containing protein At5g03250 OS=Arabidopsis thaliana GN=At5g03250 PE=2 SV=1
	c45190_g1	12.416	3.63413
	c61804_g3	12.4103	3.63347	Q8LL69	3'-N-debenzoyl-2'-deoxytaxol N-benzoyltransferase OS=Taxus canadensis GN=TAX10 PE=1 SV=1
	c11165_g1	12.4023	3.63254	Q8L884	Auxin transporter-like protein 4 OS=Medicago truncatula GN=LAX4 PE=2 SV=1
	c54125_g2	12.3823	3.6302	Q949Z1	Polygalacturonase At1g48100 OS=Arabidopsis thaliana GN=At1g48100 PE=2 SV=1
	c55374_g6	12.3713	3.62892
	c6925_g1	12.3713	3.62892
	c55086_g1	12.3384	3.62509	Q9ZUA5	Vacuolar iron transporter 1 OS=Arabidopsis thaliana GN=VIT1 PE=2 SV=1
	c37198_g1	12.3145	3.62229
	c139105_g1	12.3145	3.62229	Q9FII5	Leucine-rich repeat receptor-like protein kinase TDR OS=Arabidopsis thaliana GN=TDR PE=1 SV=1
	c80188_g1	12.3026	3.62089	Q9ZWA8	Fasciclin-like arabinogalactan protein 9 OS=Arabidopsis thaliana GN=FLA9 PE=1 SV=1
	c33906_g1	12.2985	3.62041
	c122970_g1	12.2985	3.62041	Q9T048	Disease resistance protein At4g27190 OS=Arabidopsis thaliana GN=At4g27190 PE=2 SV=1
	c121089_g1	12.2562	3.61544
	c60447_g5	12.205	3.6094	Q9ZSY8	Auxin-responsive protein IAA27 OS=Arabidopsis thaliana GN=IAA27 PE=1 SV=1
	c57790_g8	12.1564	3.60365	Q56XP4	Sodium/hydrogen exchanger 2 OS=Arabidopsis thaliana GN=NHX2 PE=2 SV=2
	c106300_g1	12.1152	3.59875	Q9SLN8	2-alkenal reductase (NADP(+)-dependent) OS=Nicotiana tabacum GN=DBR PE=1 SV=1
	c61124_g1	12.111	3.59825
	c58073_g1	12.0639	3.59262	Q6E2Z6	1-Cys peroxiredoxin OS=Medicago truncatula PE=2 SV=1
	c55381_g1	12.0449	3.59035	O02414	Dynein light chain LC6, flagellar outer arm OS=Heliocidaris crassispina PE=3 SV=1
	c36800_g1	12.0224	3.58765	P22503	Endoglucanase OS=Phaseolus vulgaris PE=2 SV=2
	c46082_g1	12.0224	3.58765
	c36305_g1	12.0224	3.58765	O23044	Peroxidase 3 OS=Arabidopsis thaliana GN=PER3 PE=2 SV=1
	c45798_g1	12.0224	3.58765
	c135032_g1	12.0161	3.58689	Q7XAQ6	Transcription factor LAX PANICLE OS=Oryza sativa subsp. japonica GN=LAX PE=1 SV=1
	c63959_g1	12.0161	3.58689
	c39181_g1	12.0103	3.5862	Q9FMY3	Serine/threonine-protein kinase-like protein At5g23170 OS=Arabidopsis thaliana GN=At5g23170 PE=2 SV=1
	c46082_g3	12.0054	3.58561
	c135957_g1	11.9513	3.5791	O82318	Probably inactive leucine-rich repeat receptor-like protein kinase At2g25790 OS=Arabidopsis thaliana GN=At2g25790 PE=2 SV=1
	c120559_g1	11.9313	3.57668	Q05091	Polygalacturonase inhibitor OS=Pyrus communis GN=PGIP PE=1 SV=1
	c59436_g1	11.9193	3.57523	Q8GW32	Transcription factor PRE6 OS=Arabidopsis thaliana GN=PRE6 PE=1 SV=1
	c61283_g9	11.8558	3.56752	Q9C7T4	Transcription factor bHLH96 OS=Arabidopsis thaliana GN=BHLH96 PE=2 SV=1
	c59220_g2	11.8316	3.56458	Q69XV9	Expansin-A16 OS=Oryza sativa subsp. japonica GN=EXPA16 PE=2 SV=1
	c756_g1	11.8156	3.56263
	c50342_g2	11.7681	3.55681	Q9LHE3	Protein ASPARTIC PROTEASE IN GUARD CELL 2 OS=Arabidopsis thaliana GN=ASPG2 PE=2 SV=1
	c60447_g4	11.6832	3.54636
	c106774_g1	11.6645	3.54405
	c66868_g1	11.663	3.54387	Q9SZF7	Protein SHORT-ROOT OS=Arabidopsis thaliana GN=SHR PE=1 SV=1
	c124065_g1	11.6612	3.54364
	c78686_g1	11.6458	3.54174
	c69373_g1	11.6287	3.53962
	c48030_g1	11.6287	3.53962
	c59761_g5	11.6287	3.53962	Q9C635	Heat stress transcription factor B-4 OS=Arabidopsis thaliana GN=HSFB4 PE=2 SV=1
	c50193_g1	11.6287	3.53962	Q9FNI7	Glucomannan 4-beta-mannosyltransferase 2 OS=Arabidopsis thaliana GN=CSLA2 PE=2 SV=1
	c46393_g1	11.6287	3.53962	Q9C6W5	ABC transporter G family member 14 OS=Arabidopsis thaliana GN=ABCG14 PE=2 SV=1
	c88988_g1	11.6287	3.53962
	c85474_g1	11.6287	3.53962
	c61311_g2	11.6287	3.53962
	c55641_g3	11.6003	3.53609	O48766	Endoglucanase 11 OS=Arabidopsis thaliana GN=At2g32990 PE=2 SV=1
	c99625_g1	11.572	3.53257
	c59954_g2	11.5715	3.5325	Q9SS03	Dirigent protein 21 OS=Arabidopsis thaliana GN=DIR21 PE=3 SV=1
	c29114_g1	11.5618	3.5313
	c86275_g1	11.5611	3.5312
	c20768_g1	11.4911	3.52245
	c94250_g1	11.478	3.52079	Q53UH4	Anthocyanidin 3-O-glucoside 2''-O-glucosyltransferase OS=Ipomoea nil GN=3GGT PE=1 SV=1
	c37254_g1	11.4688	3.51964
	c52077_g1	11.4688	3.51964
	c52215_g2	11.4688	3.51964	P14009	14 kDa proline-rich protein DC2.15 OS=Daucus carota PE=2 SV=1
	c121525_g1	11.4688	3.51964
	c83259_g1	11.4593	3.51845	Q9LPC1	UDP-glucuronate 4-epimerase 2 OS=Arabidopsis thaliana GN=GAE2 PE=2 SV=1
	c60457_g2	11.4511	3.51742
	c16186_g1	11.4449	3.51663	Q8LF99	Probable xyloglucan endotransglucosylase/hydrolase protein 6 OS=Arabidopsis thaliana GN=XTH6 PE=2 SV=2
	c93363_g1	11.4338	3.51524	P93149	Licodione synthase OS=Glycyrrhiza echinata GN=CYP93B1 PE=1 SV=2
	c56165_g3	11.4212	3.51364	O49621	MLO-like protein 1 OS=Arabidopsis thaliana GN=MLO1 PE=1 SV=1
	c62014_g7	11.3984	3.51075	Q8RUN2	Cytokinin riboside 5'-monophosphate phosphoribohydrolase LOG1 OS=Arabidopsis thaliana GN=LOG1 PE=1 SV=1
	c47602_g1	11.3902	3.50972	Q00624	L-ascorbate oxidase homolog OS=Brassica napus GN=Bp10 PE=2 SV=1
	c141377_g1	11.3849	3.50905
	c120901_g1	11.3349	3.5027	Q8VYE5	Glucan endo-1,3-beta-glucosidase 12 OS=Arabidopsis thaliana GN=At4g29360 PE=1 SV=1
	c55286_g4	11.3117	3.49974	Q41951	Aquaporin TIP2-1 OS=Arabidopsis thaliana GN=TIP2-1 PE=1 SV=2
	c28983_g1	11.305	3.49888	Q9LIS1	Protein ECERIFERUM 26-like OS=Arabidopsis thaliana GN=CER26L PE=2 SV=1
	c134887_g1	11.259	3.493	O64864	Protein YLS3 OS=Arabidopsis thaliana GN=YLS3 PE=2 SV=1
	c93092_g1	11.2445	3.49115	Q03211	Pistil-specific extensin-like protein OS=Nicotiana tabacum PE=2 SV=1
	c38900_g1	11.2351	3.48994
	c21599_g1	11.2351	3.48994
	c22602_g1	11.2351	3.48994
	c83402_g1	11.2351	3.48994	Q9LZ31	Cytochrome P450 77A4 OS=Arabidopsis thaliana GN=CYP77A4 PE=2 SV=1
	c23389_g1	11.2351	3.48994	Q84WN3	Bidirectional sugar transporter SWEET17 OS=Arabidopsis thaliana GN=SWEET17 PE=2 SV=2
	c62139_g6	11.2189	3.48786	O81301	Probable pectinesterase/pectinesterase inhibitor 40 OS=Arabidopsis thaliana GN=PME40 PE=2 SV=1
	c61059_g4	11.2121	3.48698	Q8L883	Auxin transporter-like protein 5 OS=Medicago truncatula GN=LAX5 PE=2 SV=1
	c45684_g1	11.2098	3.48669	Q41916	Cysteine proteinase inhibitor 5 OS=Arabidopsis thaliana GN=CYS5 PE=2 SV=2
	c49372_g1	11.187	3.48375	Q94KD8	Probable beta-D-xylosidase 2 OS=Arabidopsis thaliana GN=BXL2 PE=2 SV=1
	c57883_g1	11.1798	3.48283	Q9SJL9	Probable xyloglucan endotransglucosylase/hydrolase protein 32 OS=Arabidopsis thaliana GN=XTH32 PE=2 SV=1
	c112803_g1	11.1687	3.48139
	c56679_g2	11.1687	3.48139	Q50EX6	Protein ODORANT1 OS=Petunia hybrida GN=ODO1 PE=2 SV=1
	c18885_g1	11.1687	3.48139
	c25763_g1	11.157	3.47988
	c12677_g1	11.1315	3.47658
	c30502_g1	11.1315	3.47658	Q8VZ17	Histone-lysine N-methyltransferase, H3 lysine-9 specific SUVH6 OS=Arabidopsis thaliana GN=SUVH6 PE=2 SV=2
	c53900_g1	11.1134	3.47423
	c31998_g1	11.1005	3.47255	Q9ATM6	Aquaporin PIP2-4 OS=Zea mays GN=PIP2-4 PE=1 SV=1
	c23566_g2	11.0741	3.46912	P32291	Omega-3 fatty acid desaturase, endoplasmic reticulum OS=Vigna radiata var. radiata GN=ARG1 PE=2 SV=1
	c55286_g7	11.0699	3.46857	Q41951	Aquaporin TIP2-1 OS=Arabidopsis thaliana GN=TIP2-1 PE=1 SV=2
	c3533_g2	11.0626	3.46762
	c62440_g8	11.056	3.46675	P24068	Ocs element-binding factor 1 OS=Zea mays GN=OBF1 PE=2 SV=2
	c31410_g1	10.9912	3.45827	P80728	Mavicyanin OS=Cucurbita pepo PE=1 SV=1
	c53900_g2	10.9741	3.45603	P92990	Probable polygalacturonase non-catalytic subunit JP650 OS=Arabidopsis thaliana GN=JP650 PE=2 SV=2
	c58276_g2	10.972	3.45575	Q9LNU3	Expansin-A11 OS=Arabidopsis thaliana GN=EXPA11 PE=2 SV=1
	c42876_g2	10.961	3.4543	Q9FII5	Leucine-rich repeat receptor-like protein kinase TDR OS=Arabidopsis thaliana GN=TDR PE=1 SV=1
	c48839_g1	10.9384	3.45133	C0LGK9	Probable LRR receptor-like serine/threonine-protein kinase At2g24230 OS=Arabidopsis thaliana GN=At2g24230 PE=2 SV=1
	c16476_g1	10.9324	3.45054	Q84RL7	Aquaporin PIP2-1 OS=Zea mays GN=PIP2-1 PE=1 SV=2
	c42894_g2	10.9273	3.44986
	c54236_g3	10.9273	3.44986
	c27299_g1	10.92	3.4489	Q9LF64	RING-H2 finger protein ATL52 OS=Arabidopsis thaliana GN=ATL52 PE=2 SV=1
	c134360_g1	10.9152	3.44827	Q7XKU5	2-oxoglutarate-dependent dioxygenase DAO OS=Oryza sativa subsp. japonica GN=DAO PE=2 SV=2
	c54238_g3	10.9139	3.4481	O80366	Two-component response regulator ARR9 OS=Arabidopsis thaliana GN=ARR9 PE=1 SV=1
	c47633_g3	10.9113	3.44775
	c57893_g2	10.9113	3.44775
	c54615_g2	10.9061	3.44706	Q9SK27	Early nodulin-like protein 1 OS=Arabidopsis thaliana GN=At2g25060 PE=1 SV=2
	c62647_g4	10.9043	3.44683
	c39239_g2	10.8862	3.44443	Q9XIN8	F-box protein At2g27310 OS=Arabidopsis thaliana GN=At2g27310 PE=2 SV=1
	c56621_g5	10.8862	3.44443	Q8GT20	Benzyl alcohol O-benzoyltransferase OS=Nicotiana tabacum GN=HSR201 PE=1 SV=1
	c135643_g1	10.8848	3.44424
	c18401_g1	10.8585	3.44076
	c125285_g1	10.8414	3.43848
	c44768_g1	10.8414	3.43848
	c41524_g1	10.8414	3.43848	Q8L778	Cellulose synthase A catalytic subunit 5 [UDP-forming] OS=Arabidopsis thaliana GN=CESA5 PE=1 SV=2
	c81760_g1	10.8414	3.43848
	c255_g1	10.8383	3.43807
	c52721_g2	10.8357	3.43773	O81081	Laccase-2 OS=Arabidopsis thaliana GN=LAC2 PE=2 SV=1
	c29040_g2	10.8347	3.43759	P54233	Inducible nitrate reductase [NADH] 1 OS=Glycine max GN=INR1 PE=2 SV=1
	c92724_g1	10.8286	3.43678	Q9LZL3	Aspartic proteinase PCS1 OS=Arabidopsis thaliana GN=PCS1 PE=2 SV=1
	c37026_g3	10.8259	3.43641	O80970	BTB/POZ domain-containing protein NPY2 OS=Arabidopsis thaliana GN=NPY2 PE=2 SV=1
	c127646_g1	10.7857	3.43105	Q8H5N9	Probable aquaporin PIP2-1 OS=Oryza sativa subsp. japonica GN=PIP2-1 PE=2 SV=1
	c46297_g1	10.7719	3.42921	P29136	Metalloendoproteinase 1 OS=Glycine max PE=1 SV=2
	c49636_g1	10.766	3.42841
	c56896_g2	10.7506	3.42634	Q9SJE8	Aluminum-activated malate transporter 2 OS=Arabidopsis thaliana GN=ALMT2 PE=2 SV=2
	c57727_g1	10.7481	3.42601
	c88691_g1	10.7186	3.42205
	c49011_g1	10.691	3.41833
	c135377_g1	10.691	3.41833
	c20356_g1	10.691	3.41833
	c33445_g1	10.6821	3.41713	Q9FLN8	Indole-3-acetate O-methyltransferase 1 OS=Arabidopsis thaliana GN=IAMT1 PE=1 SV=1
	c60661_g8	10.6602	3.41417
	c60478_g1	10.6402	3.41145	Q5XEZ5	Calcium permeable stress-gated cation channel 1 OS=Arabidopsis thaliana GN=CSC1 PE=2 SV=1
	c93938_g1	10.6326	3.41042
	c34042_g3	10.6266	3.40961
	c19328_g1	10.6185	3.40851	Q9LZL3	Aspartic proteinase PCS1 OS=Arabidopsis thaliana GN=PCS1 PE=2 SV=1
	c54296_g1	10.6129	3.40775	Q94CD1	Omega-hydroxypalmitate O-feruloyl transferase OS=Arabidopsis thaliana GN=HHT1 PE=1 SV=1
	c43845_g1	10.6037	3.4065
	c43246_g1	10.6037	3.4065
	c40122_g1	10.6037	3.4065	Q06850	Calcium-dependent protein kinase 1 OS=Arabidopsis thaliana GN=CPK1 PE=1 SV=1
	c49029_g1	10.6016	3.4062	O48822	WEB family protein At2g17940 OS=Arabidopsis thaliana GN=At2g17940 PE=2 SV=1
	c58636_g2	10.5663	3.4014
	c58056_g1	10.5663	3.4014	Q94AW5	Ethylene-responsive transcription factor ERF003 OS=Arabidopsis thaliana GN=ERF003 PE=2 SV=1
	c53073_g1	10.555	3.39986	Q9SS80	UPF0503 protein At3g09070, chloroplastic OS=Arabidopsis thaliana GN=At3g09070 PE=1 SV=1
	c51929_g1	10.5171	3.39466	Q940Y1	Oxysterol-binding protein-related protein 2A OS=Arabidopsis thaliana GN=ORP2A PE=2 SV=1
	c56835_g2	10.5129	3.39409	Q94AP3	Protein WALLS ARE THIN 1 OS=Arabidopsis thaliana GN=WAT1 PE=1 SV=1
	c56953_g1	10.5083	3.39346	O48928	Cytochrome P450 77A3 OS=Glycine max GN=CYP77A3 PE=2 SV=1
	c59664_g1	10.5083	3.39345	Q6AST1	Homeobox-leucine zipper protein HOX32 OS=Oryza sativa subsp. japonica GN=HOX32 PE=2 SV=1
	c61127_g1	10.503	3.39273	Q9LJK2	Abscisic acid 8'-hydroxylase 4 OS=Arabidopsis thaliana GN=CYP707A4 PE=2 SV=2
	c60430_g1	10.4863	3.39044
	c57461_g1	10.4811	3.38972	Q949Z1	Polygalacturonase At1g48100 OS=Arabidopsis thaliana GN=At1g48100 PE=2 SV=1
	c40158_g3	10.4478	3.38512	F4IH21	Protein trichome birefringence-like 33 OS=Arabidopsis thaliana GN=TBL33 PE=2 SV=1
	c57928_g1	10.4478	3.38512
	c13795_g2	10.4478	3.38512
	c108913_g1	10.4478	3.38512
	c56562_g2	10.4478	3.38512	P42753	Cyclin-D3-1 OS=Arabidopsis thaliana GN=CYCD3-1 PE=1 SV=3
	c49316_g1	10.4478	3.38512	C4B8C4	EPIDERMAL PATTERNING FACTOR-like protein 3 OS=Arabidopsis thaliana GN=EPFL3 PE=1 SV=1
	c57153_g1	10.443	3.38447
	c59610_g3	10.4302	3.38269	O23969	Pollen-specific protein SF21 OS=Helianthus annuus GN=SF21 PE=2 SV=1
	c15968_g2	10.3499	3.37155	Q9LEY1	Serine carboxypeptidase-like 35 OS=Arabidopsis thaliana GN=SCPL35 PE=2 SV=1
	c48077_g2	10.3499	3.37155	O81221	Actin OS=Gossypium hirsutum PE=3 SV=1
	c55286_g9	10.3467	3.3711	Q41951	Aquaporin TIP2-1 OS=Arabidopsis thaliana GN=TIP2-1 PE=1 SV=2
	c34009_g1	10.3436	3.37066
	c35372_g2	10.331	3.36891	Q9LYD3	Dehydration-responsive element-binding protein 3 OS=Arabidopsis thaliana GN=DREB3 PE=2 SV=1
	c55232_g1	10.331	3.36891
	c38590_g1	10.3289	3.36861	P0C8Q4	Uncharacterized protein At4g19900 OS=Arabidopsis thaliana GN=At4g19900 PE=2 SV=1
	c59211_g1	10.3268	3.36832
	c61340_g11	10.2846	3.36241	I1N462	Subtilisin-like protease Glyma18g48580 OS=Glycine max GN=Glyma18g48580 PE=1 SV=3
	c58540_g2	10.2846	3.36241	Q3E9D5	S-adenosylmethionine decarboxylase proenzyme 4 OS=Arabidopsis thaliana GN=SAMDC4 PE=1 SV=1
	c53306_g1	10.2831	3.3622
	c61811_g2	10.2719	3.36063	Q9FWX2	NAC domain-containing protein 7 OS=Arabidopsis thaliana GN=NAC007 PE=2 SV=2
	c47316_g1	10.2505	3.35763	O64722	Zinc-finger homeodomain protein 3 OS=Arabidopsis thaliana GN=ZHD3 PE=1 SV=1
	c93927_g1	10.2505	3.35763
	c48609_g1	10.2505	3.35763	Q93ZQ3	Probable inactive patatin-like protein 9 OS=Arabidopsis thaliana GN=PLP9 PE=2 SV=1
	c81688_g1	10.229	3.35459	P92982	Probable polygalacturonase non-catalytic subunit JP630 OS=Arabidopsis thaliana GN=JP630 PE=2 SV=2
	c114342_g1	10.1739	3.3468
	c136733_g1	10.1507	3.34351	Q9LHE3	Protein ASPARTIC PROTEASE IN GUARD CELL 2 OS=Arabidopsis thaliana GN=ASPG2 PE=2 SV=1
	c55331_g1	10.1139	3.33827	Q0WPS2	Cytochrome b561 domain-containing protein At4g18260 OS=Arabidopsis thaliana GN=At4g18260 PE=2 SV=1
	c55071_g6	10.1041	3.33686	Q0WQ57	Auxilin-related protein 2 OS=Arabidopsis thaliana GN=At4g12770 PE=1 SV=1
	c60368_g1	10.0883	3.33461	Q9SPV4	Salicylate carboxymethyltransferase OS=Clarkia breweri GN=SAMT PE=1 SV=1
	c35343_g1	10.0688	3.33182
	c17722_g1	10.0541	3.32971
	c57878_g2	10.0541	3.32971	Q9SZN7	Heavy metal-associated isoprenylated plant protein 26 OS=Arabidopsis thaliana GN=HIPP26 PE=1 SV=1
	c60798_g16	10.0541	3.32971
	c53443_g1	10.0541	3.32971
	c15786_g2	10.0541	3.32971	Q9ZNQ7	Hydrophobic protein RCI2A OS=Arabidopsis thaliana GN=RCI2A PE=2 SV=1
	c47238_g2	10.0541	3.32971
	c107840_g1	10.0388	3.32752
	c98491_g1	10.0303	3.32629
	c107380_g1	10.0277	3.32592
	c41257_g1	10.0044	3.32256
	c65414_g1	9.99511	3.32122	Q9M0I2	Expansin-B3 OS=Arabidopsis thaliana GN=EXPB3 PE=2 SV=2
	c54070_g1	9.97683	3.31858	Q58FS3	Transcription factor RADIALIS OS=Antirrhinum majus GN=RAD PE=1 SV=1
	c49147_g4	9.97573	3.31842	Q67YF8	Sucrose transport protein SUC7 OS=Arabidopsis thaliana GN=SUC7 PE=2 SV=2
	c4076_g1	9.94783	3.31438	Q9LDT3	Axial regulator YABBY 4 OS=Arabidopsis thaliana GN=YAB4 PE=1 SV=2
	c120727_g1	9.94068	3.31334	Q9SF78	GDSL esterase/lipase At1g71691 OS=Arabidopsis thaliana GN=At1g71691 PE=2 SV=1
	c51134_g1	9.91701	3.3099	Q94IA6	3-epi-6-deoxocathasterone 23-monooxygenase OS=Arabidopsis thaliana GN=CYP90D1 PE=2 SV=1
	c11920_g2	9.90924	3.30877	Q9FG87	3-ketoacyl-CoA synthase 19 OS=Arabidopsis thaliana GN=KCS19 PE=2 SV=1
	c50212_g1	9.87373	3.30359
	c80538_g1	9.87182	3.30332	Q43143	Pectinesterase/pectinesterase inhibitor U1 OS=Solanum lycopersicum GN=PMEU1 PE=2 SV=1
	c106897_g1	9.8368	3.29819
	c116642_g1	9.8265	3.29668
	c60447_g2	9.81079	3.29437	Q9ZSY8	Auxin-responsive protein IAA27 OS=Arabidopsis thaliana GN=IAA27 PE=1 SV=1
	c27253_g1	9.81002	3.29426
	c19286_g1	9.80291	3.29321	Q9SJB4	GDSL esterase/lipase At2g04570 OS=Arabidopsis thaliana GN=At2g04570 PE=2 SV=1
	c43046_g1	9.78427	3.29046	Q9LIF1	Monothiol glutaredoxin-S10 OS=Arabidopsis thaliana GN=GRXS10 PE=3 SV=1
	c48197_g1	9.75636	3.28634
	c44733_g1	9.75636	3.28634	Q9SJE8	Aluminum-activated malate transporter 2 OS=Arabidopsis thaliana GN=ALMT2 PE=2 SV=2
	c24283_g2	9.75294	3.28584	Q9LHE3	Protein ASPARTIC PROTEASE IN GUARD CELL 2 OS=Arabidopsis thaliana GN=ASPG2 PE=2 SV=1
	c37026_g1	9.75145	3.28562	O64814	BTB/POZ domain-containing protein NPY4 OS=Arabidopsis thaliana GN=NPY4 PE=2 SV=1
	c23945_g1	9.72842	3.28221
	c122532_g1	9.68959	3.27644	Q9SJ52	Protein YLS9 OS=Arabidopsis thaliana GN=YLS9 PE=2 SV=1
	c118548_g1	9.67961	3.27495	Q9SCV9	Beta-galactosidase 3 OS=Arabidopsis thaliana GN=BGAL3 PE=1 SV=1
	c18933_g1	9.6659	3.2729
	c1935_g1	9.66558	3.27286
	c43317_g1	9.66482	3.27274
	c33035_g1	9.66382	3.27259
	c138326_g1	9.66045	3.27209	Q9LZL3	Aspartic proteinase PCS1 OS=Arabidopsis thaliana GN=PCS1 PE=2 SV=1
	c19630_g1	9.66045	3.27209	Q9ZWQ9	Flavonol synthase/flavanone 3-hydroxylase OS=Citrus unshiu GN=FLS PE=1 SV=1
	c45759_g1	9.66045	3.27209
	c47846_g3	9.66045	3.27209	O82316	Aquaporin TIP4-1 OS=Arabidopsis thaliana GN=TIP4-1 PE=2 SV=1
	c72337_g1	9.66045	3.27209
	c63546_g7	9.66045	3.27209
	c57704_g1	9.66045	3.27209
	c134321_g1	9.61747	3.26566	Q07469	Bark storage protein A OS=Populus deltoides GN=BSPA PE=2 SV=1
	c42131_g1	9.61225	3.26487	O82337	Arabinogalactan peptide 16 OS=Arabidopsis thaliana GN=AGP16 PE=1 SV=1
	c134798_g1	9.59959	3.26297	Q9SZN7	Heavy metal-associated isoprenylated plant protein 26 OS=Arabidopsis thaliana GN=HIPP26 PE=1 SV=1
	c70734_g1	9.58977	3.2615
	c61634_g5	9.58977	3.2615
	c61488_g3	9.58856	3.26131	Q8LPH6	Transcription factor MYB86 OS=Arabidopsis thaliana GN=MYB86 PE=2 SV=1
	c53017_g1	9.55367	3.25606	P22895	P34 probable thiol protease OS=Glycine max PE=1 SV=1
	c24879_g2	9.55081	3.25562
	c54588_g2	9.50369	3.24849	Q39111	Gibberellin 20 oxidase 2 OS=Arabidopsis thaliana GN=GA20OX2 PE=2 SV=1
	c61627_g5	9.48774	3.24607	O48788	Probable inactive receptor kinase At2g26730 OS=Arabidopsis thaliana GN=At2g26730 PE=1 SV=1
	c35217_g1	9.47972	3.24485	Q0WPN8	Cysteine-rich repeat secretory protein 60 OS=Arabidopsis thaliana GN=CRRSP60 PE=1 SV=1
	c45707_g5	9.4739	3.24396
	c142514_g1	9.4739	3.24396	Q9FII2	F-box/kelch-repeat protein At5g42350 OS=Arabidopsis thaliana GN=At5g42350 PE=2 SV=1
	c82746_g1	9.4739	3.24396	Q9M0G7	Leucine-rich repeat receptor-like protein kinase PXL2 OS=Arabidopsis thaliana GN=PXL2 PE=2 SV=1
	c57430_g1	9.4739	3.24396	Q9LT67	Transcription factor bHLH113 OS=Arabidopsis thaliana GN=BHLH113 PE=2 SV=1
	c39254_g1	9.45715	3.24141	Q9T041	Microtubule-associated protein TORTIFOLIA1 OS=Arabidopsis thaliana GN=TOR1 PE=1 SV=2
	c24039_g1	9.43063	3.23735
	c60688_g10	9.43063	3.23735	Q9FG14	Myosin-binding protein 7 OS=Arabidopsis thaliana GN=MYOB7 PE=1 SV=1
	c9873_g1	9.42495	3.23648	Q8RVH5	Basic 7S globulin 2 OS=Glycine max PE=1 SV=1
	c60329_g2	9.41908	3.23559	Q6PQQ3	AP2-like ethylene-responsive transcription factor AIL5 OS=Arabidopsis thaliana GN=AIL5 PE=2 SV=2
	c45358_g1	9.41774	3.23538
	c53287_g1	9.41164	3.23445	P32291	Omega-3 fatty acid desaturase, endoplasmic reticulum OS=Vigna radiata var. radiata GN=ARG1 PE=2 SV=1
	c60447_g6	9.40942	3.23411
	c59822_g1	9.38739	3.23072	Q9ZR04	Putative cyclin-D6-1 OS=Arabidopsis thaliana GN=CYCD6-1 PE=3 SV=1
	c57794_g2	9.36952	3.22798
	c506_g1	9.36952	3.22798
	c18098_g1	9.34547	3.22427
	c57790_g11	9.34547	3.22427	Q84WG1	Sodium/hydrogen exchanger 3 OS=Arabidopsis thaliana GN=NHX3 PE=2 SV=2
	c125497_g1	9.34327	3.22393	Q6NMQ7	Gibberellin-regulated protein 6 OS=Arabidopsis thaliana GN=GASA6 PE=3 SV=1
	c30326_g1	9.32116	3.22051	Q00874	DNA-damage-repair/toleration protein DRT100 OS=Arabidopsis thaliana GN=DRT100 PE=2 SV=2
	c60884_g2	9.31155	3.21902	Q05091	Polygalacturonase inhibitor OS=Pyrus communis GN=PGIP PE=1 SV=1
	c36775_g2	9.30624	3.2182	Q9LT96	Probable leucine-rich repeat receptor-like protein kinase At5g49770 OS=Arabidopsis thaliana GN=At5g49770 PE=2 SV=1
	c16272_g1	9.30602	3.21816	Q9FM65	Fasciclin-like arabinogalactan protein 1 OS=Arabidopsis thaliana GN=FLA1 PE=1 SV=1
	c121854_g1	9.30282	3.21767
	c2333_g2	9.30061	3.21733	P20649	ATPase 1, plasma membrane-type OS=Arabidopsis thaliana GN=AHA1 PE=1 SV=3
	c17643_g2	9.29228	3.21603	Q9SZB9	Peroxidase 47 OS=Arabidopsis thaliana GN=PER47 PE=2 SV=2
	c49073_g1	9.27642	3.21357	Q8H174	Auxin-responsive protein IAA31 OS=Arabidopsis thaliana GN=IAA31 PE=2 SV=2
	c50317_g1	9.25643	3.21046	A2XLF4	Zinc-finger homeodomain protein 11 OS=Oryza sativa subsp. indica GN=ZHD11 PE=3 SV=1
	c93856_g1	9.2542	3.21011
	c54253_g1	9.23245	3.20671	Q94JQ6	Cellulose synthase A catalytic subunit 6 [UDP-forming] OS=Arabidopsis thaliana GN=CESA6 PE=1 SV=2
	c7022_g1	9.22773	3.20598	Q8LA14	Putative phytosulfokines 6 OS=Arabidopsis thaliana GN=PSK6 PE=2 SV=2
	c2333_g1	9.22516	3.20557	P19456	ATPase 2, plasma membrane-type OS=Arabidopsis thaliana GN=AHA2 PE=1 SV=2
	c124727_g1	9.2225	3.20516
	c59038_g1	9.21251	3.20359	Q9LRT1	Probably inactive leucine-rich repeat receptor-like protein kinase At3g28040 OS=Arabidopsis thaliana GN=At3g28040 PE=2 SV=1
	c36215_g1	9.19776	3.20128	Q9SJ52	Protein YLS9 OS=Arabidopsis thaliana GN=YLS9 PE=2 SV=1
	c14433_g1	9.19645	3.20108
	c92673_g1	9.19483	3.20082
	c60822_g3	9.19225	3.20042	Q6WUC2	(R,S)-reticuline 7-O-methyltransferase OS=Papaver somniferum GN=PSOMT1 PE=1 SV=1
	c127260_g1	9.19143	3.20029	Q651X6	Cellulose synthase-like protein E6 OS=Oryza sativa subsp. japonica GN=CSLE6 PE=2 SV=1
	c60590_g2	9.19143	3.20029
	c42099_g1	9.19143	3.20029	Q9SU40	Monocopper oxidase-like protein SKU5 OS=Arabidopsis thaliana GN=SKU5 PE=1 SV=1
	c15746_g1	9.19143	3.20029
	c100470_g1	9.19143	3.20029
	c64926_g1	9.19143	3.20029
	c56244_g1	9.19143	3.20029
	c61634_g11	9.1741	3.19757	Q8L884	Auxin transporter-like protein 4 OS=Medicago truncatula GN=LAX4 PE=2 SV=1
	c54399_g1	9.14997	3.19377	Q9LYR6	Protein NRT1/ PTR FAMILY 6.1 OS=Arabidopsis thaliana GN=NPF6.1 PE=2 SV=1
	c15968_g1	9.13875	3.192	Q9LEY1	Serine carboxypeptidase-like 35 OS=Arabidopsis thaliana GN=SCPL35 PE=2 SV=1
	c122356_g1	9.13805	3.19189	O80760	Probable polygalacturonase non-catalytic subunit At1g60390 OS=Arabidopsis thaliana GN=At1g60390 PE=2 SV=1
	c42754_g2	9.12233	3.1894
	c51913_g1	9.10796	3.18713
	c60478_g2	9.10237	3.18624	Q5XEZ5	Calcium permeable stress-gated cation channel 1 OS=Arabidopsis thaliana GN=CSC1 PE=2 SV=1
	c121422_g1	9.08645	3.18372
	c51226_g2	9.06569	3.18042
	c107508_g1	9.06446	3.18022	Q9SB61	Zinc-finger homeodomain protein 2 OS=Arabidopsis thaliana GN=ZHD1 PE=1 SV=1
	c15089_g1	9.06321	3.18002	Q8L500	Two-component response regulator-like APRR9 OS=Arabidopsis thaliana GN=APRR9 PE=1 SV=2
	c54752_g2	9.05873	3.17931
	c51101_g1	9.04904	3.17777	Q40161	Polygalacturonase-1 non-catalytic subunit beta OS=Solanum lycopersicum GN=GP1 PE=1 SV=1
	c45201_g1	9.03404	3.17537	O22938	Leucine-rich repeat receptor-like tyrosine-protein kinase At2g41820 OS=Arabidopsis thaliana GN=At2g41820 PE=2 SV=1
	c62313_g1	9.03021	3.17476
	c9472_g2	8.9743	3.1658	P13089	Auxin-induced protein AUX28 OS=Glycine max GN=AUX28 PE=2 SV=1
	c49108_g3	8.96942	3.16502
	c147371_g1	8.96622	3.1645
	c47251_g2	8.9585	3.16326	P13087	Miraculin OS=Synsepalum dulcificum PE=1 SV=3
	c52421_g1	8.94183	3.16057
	c62543_g8	8.94183	3.16057	Q9M0E2	60S ribosomal protein L28-2 OS=Arabidopsis thaliana GN=RPL28C PE=2 SV=1
	c20513_g1	8.92902	3.1585
	c33745_g1	8.92632	3.15807
	c2569_g2	8.91659	3.15649	Q9MA74	Serine decarboxylase OS=Arabidopsis thaliana GN=SDC PE=1 SV=1
	c38006_g1	8.90897	3.15526
	c35665_g2	8.90897	3.15526
	c53614_g1	8.90897	3.15526	Q9FND6	Pentatricopeptide repeat-containing protein At5g40410, mitochondrial OS=Arabidopsis thaliana GN=PCMP-H15 PE=2 SV=1
	c112534_g1	8.90897	3.15526	Q0WPN8	Cysteine-rich repeat secretory protein 60 OS=Arabidopsis thaliana GN=CRRSP60 PE=1 SV=1
	c4742_g1	8.90897	3.15526	P69781	GATA transcription factor 12 OS=Arabidopsis thaliana GN=GATA12 PE=2 SV=1
	c55975_g1	8.90652	3.15486	Q9FGQ7	Cyclin-D3-2 OS=Arabidopsis thaliana GN=CYCD3-2 PE=2 SV=1
	c64946_g1	8.90612	3.1548	Q6ESZ9	Serine decarboxylase 1 OS=Oryza sativa subsp. japonica GN=SDC1 PE=3 SV=1
	c61932_g3	8.8979	3.15347	O81001	Growth-regulating factor 1 OS=Arabidopsis thaliana GN=GRF1 PE=1 SV=1
	c117647_g1	8.89035	3.15224	Q9FJZ3	Mannan endo-1,4-beta-mannosidase 7 OS=Arabidopsis thaliana GN=MAN7 PE=2 SV=1
	c62977_g4	8.87722	3.15011	O65351	Subtilisin-like protease SBT1.7 OS=Arabidopsis thaliana GN=SBT1.7 PE=1 SV=1
	c52543_g2	8.86717	3.14847	O48928	Cytochrome P450 77A3 OS=Glycine max GN=CYP77A3 PE=2 SV=1
	c1793_g1	8.85056	3.14577
	c52270_g2	8.85056	3.14577
	c121892_g1	8.81338	3.1397
	c52354_g3	8.80786	3.13879	P30171	Actin-97 OS=Solanum tuberosum GN=AC97 PE=1 SV=1
	c59212_g1	8.79842	3.13724	Q6NKN9	Transcription factor bHLH74 OS=Arabidopsis thaliana GN=BHLH74 PE=1 SV=1
	c22763_g2	8.77968	3.13417	Q9LFS4	Protein NSP-INTERACTING KINASE 1 OS=Arabidopsis thaliana GN=NIK1 PE=1 SV=1
	c92195_g1	8.77047	3.13265	Q9SCP2	Probable pectate lyase 12 OS=Arabidopsis thaliana GN=At3g53190 PE=2 SV=2
	c136316_g1	8.76232	3.13131	Q03194	Plasma membrane ATPase 4 OS=Nicotiana plumbaginifolia GN=PMA4 PE=2 SV=1
	c79338_g1	8.76134	3.13115	Q8L9J9	Probable carbohydrate esterase At4g34215 OS=Arabidopsis thaliana GN=At4g34215 PE=1 SV=2
	c56072_g3	8.76134	3.13115
	c42610_g2	8.75464	3.13005	O48818	Expansin-A4 OS=Arabidopsis thaliana GN=EXPA4 PE=1 SV=1
	c47602_g2	8.72837	3.12571	Q00624	L-ascorbate oxidase homolog OS=Brassica napus GN=Bp10 PE=2 SV=1
	c94791_g1	8.72367	3.12494	Q9M2A0	ATPase 8, plasma membrane-type OS=Arabidopsis thaliana GN=AHA8 PE=3 SV=1
	c57893_g1	8.72187	3.12464
	c63215_g2	8.70877	3.12247	Q941L0	Cellulose synthase A catalytic subunit 3 [UDP-forming] OS=Arabidopsis thaliana GN=CESA3 PE=1 SV=2
	c83470_g1	8.70877	3.12247	Q6WFW1	Crocetin glucosyltransferase 3 OS=Crocus sativus GN=GLT3 PE=1 SV=1
	c98326_g1	8.70877	3.12247
	c49075_g1	8.69202	3.11969
	c49175_g1	8.6843	3.11841	Q8LE98	Interactor of constitutive active ROPs 1 OS=Arabidopsis thaliana GN=ICR1 PE=1 SV=1
	c57616_g1	8.6843	3.11841	Q6WUC2	(R,S)-reticuline 7-O-methyltransferase OS=Papaver somniferum GN=PSOMT1 PE=1 SV=1
	c62886_g4	8.65533	3.11359	Q9ZTX9	Auxin response factor 4 OS=Arabidopsis thaliana GN=ARF4 PE=1 SV=1
	c52721_g1	8.63078	3.10949	O81081	Laccase-2 OS=Arabidopsis thaliana GN=LAC2 PE=2 SV=1
	c99428_g1	8.62651	3.10878	Q84RF2	Transcription repressor OFP17 OS=Arabidopsis thaliana GN=OFP17 PE=2 SV=1
	c61766_g3	8.62651	3.10878
	c39472_g1	8.62651	3.10878
	c60712_g4	8.62651	3.10878
	c48077_g1	8.60693	3.1055	P24902	Actin (Fragment) OS=Pinus contorta PE=3 SV=1
	c52121_g1	8.59838	3.10406	Q6NMR8	Protein FANTASTIC FOUR 3 OS=Arabidopsis thaliana GN=FAF3 PE=2 SV=1
	c57674_g1	8.50952	3.08908	Q41916	Cysteine proteinase inhibitor 5 OS=Arabidopsis thaliana GN=CYS5 PE=2 SV=2
	c47012_g2	8.49746	3.08703	P13917	Basic 7S globulin OS=Glycine max GN=BG PE=1 SV=2
	c57157_g1	8.49203	3.08611
	c23395_g1	8.49203	3.08611
	c62762_g10	8.48969	3.08571	Q9S7Y1	Transcription factor bHLH30 OS=Arabidopsis thaliana GN=BHLH30 PE=1 SV=1
	c56896_g1	8.48177	3.08436	Q9XIN1	Aluminum-activated malate transporter 7 OS=Arabidopsis thaliana GN=ALMT7 PE=3 SV=1
	c18722_g1	8.47638	3.08345
	c49147_g1	8.47627	3.08343	Q67YF8	Sucrose transport protein SUC7 OS=Arabidopsis thaliana GN=SUC7 PE=2 SV=2
	c134759_g1	8.46203	3.081
	c59464_g2	8.45393	3.07962	Q39891	Probable 2-isopropylmalate synthase OS=Glycine max GN=GMN56 PE=2 SV=1
	c16186_g2	8.45216	3.07932
	c57794_g1	8.43923	3.07711
	c32096_g1	8.43639	3.07663	Q9FFD5	CRIB domain-containing protein RIC4 OS=Arabidopsis thaliana GN=RIC4 PE=1 SV=1
	c82318_g1	8.40034	3.07045
	c110842_g1	8.40034	3.07045	Q9ZRA4	Auxin-binding protein ABP19a OS=Prunus persica GN=ABP19A PE=3 SV=1
	c123823_g1	8.40034	3.07045	Q3S4A7	Histidine kinase 5 OS=Arabidopsis thaliana GN=AHK5 PE=1 SV=1
	c2569_g1	8.3856	3.06791	Q6ESZ9	Serine decarboxylase 1 OS=Oryza sativa subsp. japonica GN=SDC1 PE=3 SV=1
	c47638_g1	8.38268	3.06741	Q9FII5	Leucine-rich repeat receptor-like protein kinase TDR OS=Arabidopsis thaliana GN=TDR PE=1 SV=1
	c61950_g8	8.37054	3.06532
	c43051_g1	8.36732	3.06477
	c15457_g1	8.36634	3.0646
	c41203_g1	8.35887	3.06331
	c61427_g2	8.35137	3.06201	Q9FJD5	Laccase-17 OS=Arabidopsis thaliana GN=LAC17 PE=2 SV=1
	c45349_g1	8.34404	3.06075
	c109658_g1	8.34404	3.06075	P28493	Pathogenesis-related protein 5 OS=Arabidopsis thaliana GN=At1g75040 PE=1 SV=1
	c136011_g1	8.34404	3.06075
	c17455_g1	8.34404	3.06075
	c51698_g3	8.34404	3.06075
	c32232_g1	8.34404	3.06075
	c43113_g1	8.34404	3.06075	Q9SK52	Peroxidase 18 OS=Arabidopsis thaliana GN=PER18 PE=3 SV=1
	c52088_g1	8.29749	3.05267
	c121024_g1	8.28715	3.05088	Q9LFR3	Gibberellin-regulated protein 14 OS=Arabidopsis thaliana GN=GASA14 PE=1 SV=1
	c56377_g2	8.28126	3.04985	Q9LDT3	Axial regulator YABBY 4 OS=Arabidopsis thaliana GN=YAB4 PE=1 SV=2
	c92367_g1	8.27682	3.04908	P52581	Isoflavone reductase homolog OS=Lupinus albus PE=2 SV=1
	c48197_g2	8.27671	3.04906	Q9LFR3	Gibberellin-regulated protein 14 OS=Arabidopsis thaliana GN=GASA14 PE=1 SV=1
	c41196_g1	8.26827	3.04759
	c49670_g2	8.26827	3.04759
	c97264_g1	8.26827	3.04759	Q3E7Q9	Probable glycosyltransferase At5g25310 OS=Arabidopsis thaliana GN=At5g25310 PE=3 SV=2
	c40179_g1	8.26827	3.04759	P0C2F6	Putative ribonuclease H protein At1g65750 OS=Arabidopsis thaliana GN=At1g65750 PE=3 SV=1
	c60438_g1	8.25971	3.04609	Q8LPG9	Protein IQ-DOMAIN 14 OS=Arabidopsis thaliana GN=IQD14 PE=1 SV=1
	c79038_g1	8.25971	3.04609
	c122173_g1	8.25205	3.04475
	c47028_g1	8.25158	3.04467
	c66660_g1	8.23609	3.04196
	c59753_g3	8.23313	3.04144
	c40297_g3	8.23249	3.04133
	c128819_g1	8.23249	3.04133
	c63284_g1	8.21985	3.03911
	c60798_g19	8.21985	3.03911
	c20521_g1	8.21787	3.03876	C6T636	Putative uncharacterized protein OS=Glycine max PE=2 SV=1
	c15169_g1	8.21323	3.03795	O24407	Auxin-responsive protein IAA16 OS=Arabidopsis thaliana GN=IAA16 PE=1 SV=1
	c25398_g1	8.20546	3.03658	Q94EJ6	Probable methyltransferase PMT14 OS=Arabidopsis thaliana GN=At4g18030 PE=2 SV=1
	c55868_g2	8.20276	3.03611	A0A0B2P1W0	RNA-binding protein 38 OS=Glycine soja GN=glysoja_009690 PE=4 SV=1
	c49147_g3	8.19456	3.03467	Q03411	Sucrose transport protein OS=Spinacia oleracea PE=2 SV=1
	c51164_g2	8.18871	3.03364	Q94KD8	Probable beta-D-xylosidase 2 OS=Arabidopsis thaliana GN=BXL2 PE=2 SV=1
	c32884_g1	8.18623	3.0332
	c57970_g7	8.16153	3.02884
	c56264_g1	8.13718	3.02453	Q9FII5	Leucine-rich repeat receptor-like protein kinase TDR OS=Arabidopsis thaliana GN=TDR PE=1 SV=1
	c62854_g3	8.13674	3.02445
	c55422_g1	8.13113	3.02346	G7JHI3	Alpha/beta fold hydrolase OS=Medicago truncatula GN=MTR_4g083080 PE=4 SV=1
	c58620_g1	8.12767	3.02284	A9X7L0	Anthranilate N-methyltransferase OS=Ruta graveolens PE=1 SV=1
	c63226_g3	8.09355	3.01677	Q7XPY2	Plasma membrane ATPase OS=Oryza sativa subsp. japonica GN=Os04g0656100 PE=2 SV=1
	c61607_g3	8.0657	3.0118	Q9MAJ7	Beta-galactosidase 5 OS=Arabidopsis thaliana GN=BGAL5 PE=2 SV=1
	c60873_g1	8.06367	3.01144	Q9SLX0	Importin subunit alpha-1b OS=Oryza sativa subsp. japonica GN=Os05g0155500 PE=1 SV=2
	c61494_g1	8.05511	3.0099	Q9LHE3	Protein ASPARTIC PROTEASE IN GUARD CELL 2 OS=Arabidopsis thaliana GN=ASPG2 PE=2 SV=1
	c52062_g2	8.05237	3.00941	Q9FJU9	Glucan endo-1,3-beta-glucosidase 13 OS=Arabidopsis thaliana GN=At5g56590 PE=1 SV=1
	c653_g1	8.04802	3.00863
	c30430_g1	8.04802	3.00863
	c93030_g1	8.04711	3.00847
	c69430_g1	8.03935	3.00708
	c29934_g1	8.03935	3.00708
	c50082_g3	8.03935	3.00708	C0LGS3	Probable LRR receptor-like serine/threonine-protein kinase At4g37250 OS=Arabidopsis thaliana GN=At4g37250 PE=2 SV=1
	c51285_g1	8.03935	3.00708
	c63302_g2	8.03333	3.006	Q09WV7	Protein Ycf2 OS=Morus indica GN=ycf2-A PE=3 SV=1
	c58984_g1	8.0308	3.00554	Q9FJD6	Putative respiratory burst oxidase homolog protein H OS=Arabidopsis thaliana GN=RBOHH PE=3 SV=1
	c79416_g1	8.02891	3.0052	Q43137	Probable mannitol dehydrogenase 1 OS=Stylosanthes humilis GN=CAD1 PE=2 SV=1
	c117584_g1	8.02553	3.0046
	c48878_g1	8.02285	3.00412	Q9FNL7	Protein NRT1/ PTR FAMILY 5.2 OS=Arabidopsis thaliana GN=NPF5.2 PE=2 SV=1
	c28685_g1	8.02285	3.00412	Q7Y214	Transcription factor GTE7 OS=Arabidopsis thaliana GN=GTE7 PE=2 SV=1
	c59732_g2	8.02068	3.00373	Q9FE79	Ras-related protein RABA4c OS=Arabidopsis thaliana GN=RABA4C PE=2 SV=1
	c27696_g1	8.02068	3.00373	Q9LSQ6	Calcium-binding protein PBP1 OS=Arabidopsis thaliana GN=PBP1 PE=1 SV=1
	c38813_g1	8.01928	3.00347	O64682	Protein kinase PINOID OS=Arabidopsis thaliana GN=PID PE=1 SV=1
	c34042_g2	8.01318	3.00238
	c54300_g1	8.00289	3.00052	Q9ZWS9	Two-component response regulator ARR3 OS=Arabidopsis thaliana GN=ARR3 PE=2 SV=1
	c49773_g3	8.00122	3.00022
	c47251_g1	8.00057	3.0001	P13087	Miraculin OS=Synsepalum dulcificum PE=1 SV=3
	c48878_g4	7.99064	2.99831	Q9FNL7	Protein NRT1/ PTR FAMILY 5.2 OS=Arabidopsis thaliana GN=NPF5.2 PE=2 SV=1
	c25124_g1	7.98842	2.99791
	c21136_g1	7.97917	2.99624
	c64542_g1	7.97483	2.99545
	c57347_g1	7.97054	2.99468
	c80079_g1	7.93764	2.98871
	c58397_g4	7.93764	2.98871	Q8LDW9	Xyloglucan endotransglucosylase/hydrolase protein 9 OS=Arabidopsis thaliana GN=XTH9 PE=2 SV=2
	c106964_g1	7.91874	2.98527
	c56179_g2	7.91771	2.98508
	c129955_g1	7.9118	2.98401	Q40161	Polygalacturonase-1 non-catalytic subunit beta OS=Solanum lycopersicum GN=GP1 PE=1 SV=1
	c52141_g1	7.90449	2.98267	Q9LFT5	EPIDERMAL PATTERNING FACTOR-like protein 1 OS=Arabidopsis thaliana GN=EPFL1 PE=1 SV=1
	c58871_g1	7.89629	2.98118	Q5XQC7	Protein BONZAI 3 OS=Arabidopsis thaliana GN=BON3 PE=1 SV=1
	c61428_g9	7.89629	2.98118
	c43130_g1	7.87616	2.97749	Q9LZV3	Mannan endo-1,4-beta-mannosidase 6 OS=Arabidopsis thaliana GN=MAN6 PE=2 SV=1
	c119471_g1	7.85885	2.97432	Q9LJP4	Xyloglucan glycosyltransferase 4 OS=Arabidopsis thaliana GN=CSLC4 PE=1 SV=1
	c23209_g2	7.82777	2.9686	O80434	Laccase-4 OS=Arabidopsis thaliana GN=IRX12 PE=2 SV=2
	c10411_g1	7.82777	2.9686	P93332	Bidirectional sugar transporter N3 OS=Medicago truncatula GN=N3 PE=2 SV=1
	c62395_g1	7.82777	2.9686	Q56YP2	Phosphatidylinositol 4-phosphate 5-kinase 1 OS=Arabidopsis thaliana GN=PIP5K1 PE=1 SV=1
	c64572_g1	7.82098	2.96735
	c55293_g3	7.81982	2.96714	Q8LFN2	Probable inactive leucine-rich repeat receptor-like protein kinase At3g03770 OS=Arabidopsis thaliana GN=At3g03770 PE=2 SV=1
	c134900_g1	7.81646	2.96652
	c56577_g1	7.81587	2.96641	Q8GYX8	Chaperone protein dnaJ 10 OS=Arabidopsis thaliana GN=ATJ10 PE=2 SV=2
	c92688_g1	7.81279	2.96584	Q9FZ96	Purine permease 1 OS=Arabidopsis thaliana GN=PUP1 PE=1 SV=1
	c44703_g1	7.80855	2.96505
	c58862_g4	7.80123	2.9637	Q39123	Homeobox-leucine zipper protein ATHB-8 OS=Arabidopsis thaliana GN=ATHB-8 PE=1 SV=1
	c57561_g1	7.79962	2.9634	A6BM07	Isoflavone 7-O-glucosyltransferase 1 OS=Glycine max GN=GmIF7GT1 PE=1 SV=1
	c60345_g4	7.7983	2.96316
	c45649_g1	7.79519	2.96258	Q40161	Polygalacturonase-1 non-catalytic subunit beta OS=Solanum lycopersicum GN=GP1 PE=1 SV=1
	c52285_g2	7.77788	2.95938	Q00451	36.4 kDa proline-rich protein OS=Solanum lycopersicum GN=TPRP-F1 PE=2 SV=1
	c52459_g1	7.76466	2.95692	P32294	Auxin-induced protein 22B OS=Vigna radiata var. radiata GN=AUX22B PE=2 SV=1
	c52520_g1	7.75438	2.95501	Q9LHK4	Putative ABC transporter B family member 8 OS=Arabidopsis thaliana GN=ABCB8 PE=5 SV=1
	c58487_g1	7.75438	2.95501	Q9SZN7	Heavy metal-associated isoprenylated plant protein 26 OS=Arabidopsis thaliana GN=HIPP26 PE=1 SV=1
	c46255_g1	7.74208	2.95272
	c92739_g1	7.74069	2.95246	A2ZW16	Phospholipase A1-II 1 OS=Oryza sativa subsp. japonica GN=Os01g0651100 PE=3 SV=2
	c49379_g1	7.72754	2.95001	Q5XF09	Probable sugar phosphate/phosphate translocator At3g11320 OS=Arabidopsis thaliana GN=At3g11320 PE=2 SV=1
	c54992_g1	7.72069	2.94873	Q8L8Q3	LOB domain-containing protein 25 OS=Arabidopsis thaliana GN=LBD25 PE=2 SV=3
	c8159_g1	7.71568	2.94779
	c120723_g1	7.71174	2.94706	Q9LHF1	Leucine-rich repeat extensin-like protein 4 OS=Arabidopsis thaliana GN=LRX4 PE=2 SV=1
	c51698_g2	7.70505	2.9458
	c81176_g1	7.6923	2.94341	Q43019	Non-specific lipid-transfer protein 3 OS=Prunus dulcis PE=2 SV=1
	c58978_g2	7.67836	2.9408	O64782	G-type lectin S-receptor-like serine/threonine-protein kinase SD1-29 OS=Arabidopsis thaliana GN=SD129 PE=1 SV=1
	c47012_g1	7.67425	2.94003	P13917	Basic 7S globulin OS=Glycine max GN=BG PE=1 SV=2
	c46713_g1	7.67228	2.93966
	c56810_g1	7.67112	2.93944
	c54277_g2	7.66709	2.93868	B6VJS4	Trans-resveratrol di-O-methyltransferase OS=Vitis vinifera GN=ROMT PE=1 SV=2
	c53083_g1	7.66191	2.9377	Q9SJ81	Fasciclin-like arabinogalactan protein 7 OS=Arabidopsis thaliana GN=FLA7 PE=1 SV=1
	c31319_g1	7.64696	2.93489	G7ZZ33	3-oxo-5-alpha-steroid 4-dehydrogenase OS=Medicago truncatula GN=MTR_8g023760 PE=4 SV=1
	c58357_g2	7.63149	2.93197	Q0WPS2	Cytochrome b561 domain-containing protein At4g18260 OS=Arabidopsis thaliana GN=At4g18260 PE=2 SV=1
	c48368_g2	7.61039	2.92797	Q8L8A5	GRF1-interacting factor 1 OS=Arabidopsis thaliana GN=GIF1 PE=1 SV=1
	c18383_g1	7.60358	2.92668	Q9LFS4	Protein NSP-INTERACTING KINASE 1 OS=Arabidopsis thaliana GN=NIK1 PE=1 SV=1
	c46576_g1	7.60235	2.92644
	c18928_g1	7.59751	2.92553	Q9FT45	Fasciclin-like arabinogalactan protein 15 OS=Arabidopsis thaliana GN=FLA15 PE=2 SV=1
	c111320_g1	7.57611	2.92146	Q9SCV9	Beta-galactosidase 3 OS=Arabidopsis thaliana GN=BGAL3 PE=1 SV=1
	c58463_g1	7.57464	2.92118
	c136666_g1	7.57464	2.92118
	c24879_g1	7.57219	2.92071	Q9SJH0	Transcription factor PAR1 OS=Arabidopsis thaliana GN=PAR1 PE=1 SV=1
	c55308_g4	7.55716	2.91784
	c128926_g1	7.55716	2.91784
	c31237_g1	7.54899	2.91628	O80327	Thaumatin-like protein 1 OS=Pyrus pyrifolia GN=TL1 PE=1 SV=1
	c31201_g1	7.54631	2.91577
	c56682_g1	7.5411	2.91477	Q9SZN7	Heavy metal-associated isoprenylated plant protein 26 OS=Arabidopsis thaliana GN=HIPP26 PE=1 SV=1
	c37801_g1	7.5394	2.91445	Q58G01	Transcription factor bHLH155 OS=Arabidopsis thaliana GN=BHLH155 PE=2 SV=1
	c16668_g1	7.53357	2.91333
	c52095_g1	7.53127	2.91289	Q9ZRA4	Auxin-binding protein ABP19a OS=Prunus persica GN=ABP19A PE=3 SV=1
	c58479_g3	7.5192	2.91058	Q8LF99	Probable xyloglucan endotransglucosylase/hydrolase protein 6 OS=Arabidopsis thaliana GN=XTH6 PE=2 SV=2
	c59079_g1	7.50103	2.90709	Q9SU13	Fasciclin-like arabinogalactan protein 2 OS=Arabidopsis thaliana GN=FLA2 PE=1 SV=1
	c68340_g1	7.4999	2.90687	Q9LUC5	Cytochrome P450 72A15 OS=Arabidopsis thaliana GN=CYP72A15 PE=2 SV=1
	c43007_g2	7.49986	2.90686
	c10258_g1	7.49932	2.90676	O80932	Expansin-A3 OS=Arabidopsis thaliana GN=EXPA3 PE=2 SV=1
	c61641_g2	7.49897	2.90669	Q9FWX2	NAC domain-containing protein 7 OS=Arabidopsis thaliana GN=NAC007 PE=2 SV=2
	c36708_g1	7.49897	2.90669	Q9LQ32	Glucuronoxylan 4-O-methyltransferase 3 OS=Arabidopsis thaliana GN=GXM3 PE=1 SV=1
	c41196_g2	7.49876	2.90665
	c26758_g2	7.49786	2.90648	Q8LQ92	Endoglucanase 3 OS=Oryza sativa subsp. japonica GN=GLU8 PE=2 SV=1
	c41639_g1	7.49786	2.90648
	c56982_g1	7.48892	2.90476
	c30514_g1	7.47239	2.90157	Q9LY46	Protein ESKIMO 1 OS=Arabidopsis thaliana GN=ESK1 PE=1 SV=1
	c81837_g1	7.4648	2.9001	Q9FZ86	PLASMODESMATA CALLOSE-BINDING PROTEIN 3 OS=Arabidopsis thaliana GN=PDCB3 PE=1 SV=1
	c57970_g2	7.46049	2.89927	Q9LDR9	Expansin-A10 OS=Arabidopsis thaliana GN=EXPA10 PE=2 SV=1
	c53118_g2	7.45991	2.89916	Q93VV5	Protein NRT1/ PTR FAMILY 4.3 OS=Arabidopsis thaliana GN=NPF4.3 PE=2 SV=1
	c27254_g2	7.45918	2.89902	A0A151UFF8	Protein CREG1 OS=Cajanus cajan GN=KK1_047406 PE=4 SV=1
	c125467_g1	7.45303	2.89783	O50001	Major allergen Pru ar 1 OS=Prunus armeniaca PE=1 SV=1
	c52897_g1	7.44044	2.89539	Q9C7N5	GDSL esterase/lipase At1g29660 OS=Arabidopsis thaliana GN=At1g29660 PE=2 SV=1
	c63696_g7	7.43489	2.89431
	c38708_g1	7.42836	2.89304	P19456	ATPase 2, plasma membrane-type OS=Arabidopsis thaliana GN=AHA2 PE=1 SV=2
	c53462_g1	7.42728	2.89283	Q9FHK7	Probable leucine-rich repeat receptor-like protein kinase At5g05160 OS=Arabidopsis thaliana GN=At5g05160 PE=2 SV=1
	c14417_g1	7.42527	2.89244	O82533	Cell division protein FtsZ homolog 2-1, chloroplastic OS=Arabidopsis thaliana GN=FTSZ2-1 PE=1 SV=2
	c34272_g1	7.42196	2.8918
	c120707_g1	7.42174	2.89176
	c60896_g9	7.42174	2.89176	Q9C5Y2	Ent-kaurenoic acid oxidase 2 OS=Arabidopsis thaliana GN=KAO2 PE=2 SV=2
	c45701_g1	7.42174	2.89176	Q9FWX2	NAC domain-containing protein 7 OS=Arabidopsis thaliana GN=NAC007 PE=2 SV=2
	c47814_g1	7.42123	2.89166
	c51405_g1	7.41526	2.8905	P23244	Hemoglobin-2 OS=Casuarina glauca GN=HBII PE=3 SV=1
	c52897_g3	7.4126	2.88998	Q9C7N5	GDSL esterase/lipase At1g29660 OS=Arabidopsis thaliana GN=At1g29660 PE=2 SV=1
	c4501_g1	7.41232	2.88993	Q9CAJ9	BTB/POZ domain-containing protein At1g63850 OS=Arabidopsis thaliana GN=At1g63850 PE=1 SV=1
	c39284_g1	7.39804	2.88714
	c39467_g2	7.39704	2.88695
	c58236_g3	7.39394	2.88634	Q3E958	Ethylene-responsive transcription factor SHINE 3 OS=Arabidopsis thaliana GN=SHN3 PE=2 SV=1
	c52468_g1	7.39244	2.88605	Q9SZN7	Heavy metal-associated isoprenylated plant protein 26 OS=Arabidopsis thaliana GN=HIPP26 PE=1 SV=1
	c60947_g1	7.37944	2.88351	O48780	3-ketoacyl-CoA synthase 11 OS=Arabidopsis thaliana GN=KCS11 PE=2 SV=1
	c45884_g1	7.37345	2.88234
	c62252_g3	7.3728	2.88221	Q564G7	Galactomannan galactosyltransferase 1 OS=Cyamopsis tetragonoloba GN=GMGT1 PE=1 SV=1
	c136359_g1	7.35689	2.8791
	c48313_g1	7.35656	2.87903
	c34069_g1	7.35315	2.87836	Q2V6J9	UDP-glucose flavonoid 3-O-glucosyltransferase 7 OS=Fragaria ananassa GN=GT7 PE=1 SV=1
	c56060_g1	7.32567	2.87296
	c20355_g1	7.32342	2.87252	P12628	NADP-dependent malic enzyme OS=Phaseolus vulgaris GN=ME1 PE=1 SV=1
	c57004_g2	7.31802	2.87145	A7PZL3	Probable polygalacturonase OS=Vitis vinifera GN=GSVIVT00026920001 PE=1 SV=1
	c59590_g1	7.31737	2.87132	Q2QS13	UDP-glucose 6-dehydrogenase 5 OS=Oryza sativa subsp. japonica GN=UGD5 PE=2 SV=1
	c58276_g1	7.31058	2.86999
	c49636_g2	7.31058	2.86999	Q8GZM7	Transcription factor PIF1 OS=Arabidopsis thaliana GN=PIF1 PE=1 SV=1
	c62878_g4	7.2997	2.86784	Q0V7T5	Probable receptor-like protein kinase At1g80640 OS=Arabidopsis thaliana GN=At1g80640 PE=2 SV=1
	c56641_g1	7.29232	2.86638
	c40816_g1	7.28946	2.86581
	c43417_g1	7.28784	2.86549	Q6ESZ9	Serine decarboxylase 1 OS=Oryza sativa subsp. japonica GN=SDC1 PE=3 SV=1
	c134447_g1	7.2754	2.86303	Q9SJB4	GDSL esterase/lipase At2g04570 OS=Arabidopsis thaliana GN=At2g04570 PE=2 SV=1
	c60958_g2	7.27524	2.863	P52409	Glucan endo-1,3-beta-glucosidase OS=Triticum aestivum GN=GLC1 PE=2 SV=1
	c84703_g1	7.27355	2.86266
	c52354_g1	7.27128	2.86221	P24902	Actin (Fragment) OS=Pinus contorta PE=3 SV=1
	c47587_g1	7.26884	2.86173	Q8LJS2	Histone deacetylase HDT1 OS=Glycine max GN=HDT1 PE=2 SV=1
	c57750_g1	7.25948	2.85987	Q9FNI7	Glucomannan 4-beta-mannosyltransferase 2 OS=Arabidopsis thaliana GN=CSLA2 PE=2 SV=1
	c64282_g1	7.24946	2.85787	P23244	Hemoglobin-2 OS=Casuarina glauca GN=HBII PE=3 SV=1
	c34419_g1	7.24184	2.85636
	c121050_g1	7.2392	2.85583	O82515	Probable mannitol dehydrogenase OS=Medicago sativa GN=CAD1 PE=1 SV=1
	c129671_g1	7.23901	2.85579	P29162	L-ascorbate oxidase homolog OS=Nicotiana tabacum PE=1 SV=1
	c45771_g1	7.22831	2.85366
	c47353_g1	7.22212	2.85242
	c59992_g1	7.22166	2.85233	Q9SB75	Probable xyloglucan glycosyltransferase 5 OS=Arabidopsis thaliana GN=CSLC5 PE=1 SV=1
	c54441_g1	7.2199	2.85198	O22126	Fasciclin-like arabinogalactan protein 8 OS=Arabidopsis thaliana GN=FLA8 PE=1 SV=1
	c47679_g1	7.20588	2.84918	Q9FWX2	NAC domain-containing protein 7 OS=Arabidopsis thaliana GN=NAC007 PE=2 SV=2
	c55982_g1	7.20588	2.84918	P27061	Acid phosphatase 1 OS=Solanum lycopersicum GN=APS1 PE=2 SV=1
	c80481_g1	7.20435	2.84887	A0A151RJD0	Putative ankyrin repeat protein RF-0381 OS=Cajanus cajan GN=KK1_036000 PE=4 SV=1
	c58851_g3	7.17892	2.84377	P22195	Cationic peroxidase 1 OS=Arachis hypogaea GN=PNC1 PE=1 SV=2
	c56155_g1	7.17659	2.8433	Q9M9C5	Probable leucine-rich repeat receptor-like protein kinase At1g68400 OS=Arabidopsis thaliana GN=At1g68400 PE=2 SV=1
	c32800_g1	7.16682	2.84133	Q9SIA4	MATE efflux family protein 5 OS=Arabidopsis thaliana GN=DTXL1 PE=3 SV=1
	c110890_g1	7.1558	2.83911	Q5N8X6	Beta-galactosidase 3 OS=Oryza sativa subsp. japonica GN=Os01g0875500 PE=3 SV=1
	c59660_g8	7.15236	2.83842	Q9M2U1	Dof zinc finger protein DOF3.6 OS=Arabidopsis thaliana GN=DOF3.6 PE=1 SV=2
	c55854_g1	7.15071	2.83809	Q9M0G7	Leucine-rich repeat receptor-like protein kinase PXL2 OS=Arabidopsis thaliana GN=PXL2 PE=2 SV=1
	c38443_g2	7.14877	2.8377
	c49773_g2	7.13903	2.83573	Q93Z32	Signal peptide peptidase-like 1 OS=Arabidopsis thaliana GN=SPPL1 PE=2 SV=1
	c59224_g2	7.13388	2.83469
	c60345_g5	7.12335	2.83256
	c56560_g1	7.11723	2.83132	Q9SU13	Fasciclin-like arabinogalactan protein 2 OS=Arabidopsis thaliana GN=FLA2 PE=1 SV=1
	c29657_g1	7.11594	2.83105
	c98681_g1	7.11314	2.83049
	c43007_g1	7.1063	2.8291
	c55104_g1	7.09287	2.82637
	c102552_g1	7.08879	2.82554	Q94JQ4	Reactive Intermediate Deaminase A, chloroplastic OS=Arabidopsis thaliana GN=RIDA PE=1 SV=1
	c135105_g1	7.08654	2.82508	Q9SJ74	Cytochrome b561 and DOMON domain-containing protein At2g04850 OS=Arabidopsis thaliana GN=At2g04850 PE=2 SV=2
	c143371_g1	7.0856	2.82489	Q9LU18	Ethylene-responsive transcription factor ERF036 OS=Arabidopsis thaliana GN=ERF036 PE=2 SV=2
	c110607_g1	7.07948	2.82364
	c63226_g7	7.07653	2.82304	Q7XPY2	Plasma membrane ATPase OS=Oryza sativa subsp. japonica GN=Os04g0656100 PE=2 SV=1
	c51749_g1	7.07194	2.82211	Q41350	Osmotin-like protein OS=Solanum lycopersicum PE=1 SV=1
	c51436_g1	7.06625	2.82094	Q941R6	MLP-like protein 31 OS=Arabidopsis thaliana GN=MLP31 PE=2 SV=2
	c98290_g1	7.06484	2.82066	P15490	Stem 28 kDa glycoprotein OS=Glycine max GN=VSPA PE=2 SV=1
	c23945_g2	7.06204	2.82008
	c62858_g1	7.04384	2.81636	A2RVM0	Short-chain dehydrogenase TIC 32, chloroplastic OS=Arabidopsis thaliana GN=TIC32 PE=2 SV=1
	c33464_g2	6.99089	2.80548	Q39265	Zinc finger protein 6 OS=Arabidopsis thaliana GN=ZFP6 PE=2 SV=1
	c32105_g1	6.99054	2.8054	I1M885	Uncharacterized protein OS=Glycine max GN=GLYMA_14G071100 PE=4 SV=1
	c7964_g1	6.99054	2.8054	Q75HE6	Probable methylenetetrahydrofolate reductase OS=Oryza sativa subsp. japonica GN=Os03g0815200 PE=2 SV=1
	c70806_g1	6.99015	2.80532
	c94968_g1	6.98539	2.80434	O48818	Expansin-A4 OS=Arabidopsis thaliana GN=EXPA4 PE=1 SV=1
	c53544_g1	6.98338	2.80392	Q9FG34	Peroxidase 54 OS=Arabidopsis thaliana GN=PER54 PE=2 SV=1
	c41140_g1	6.98215	2.80367	Q0V865	Protein FAF-like, chloroplastic OS=Arabidopsis thaliana GN=At5g22090 PE=2 SV=1
	c57255_g2	6.98215	2.80367	Q9SJ52	Protein YLS9 OS=Arabidopsis thaliana GN=YLS9 PE=2 SV=1
	c39286_g1	6.97906	2.80303
	c23614_g2	6.97707	2.80262	Q40220	Rac-like GTP-binding protein RAC2 OS=Lotus japonicus GN=RAC2 PE=2 SV=1
	c16512_g1	6.97707	2.80262
	c57748_g1	6.97664	2.80253	Q5N8X6	Beta-galactosidase 3 OS=Oryza sativa subsp. japonica GN=Os01g0875500 PE=3 SV=1
	c111124_g1	6.97466	2.80212
	c50920_g2	6.97466	2.80212
	c7946_g1	6.9717	2.80151
	c53077_g1	6.9717	2.80151
	c47510_g2	6.9717	2.80151
	c4332_g1	6.96795	2.80073	Q0WUQ1	BAG family molecular chaperone regulator 1 OS=Arabidopsis thaliana GN=BAG1 PE=1 SV=1
	c8787_g2	6.96304	2.79972	D4Q9Z4	Soyasapogenol B glucuronide galactosyltransferase OS=Glycine max GN=GmSGT2 PE=1 SV=1
	c55497_g2	6.96304	2.79972	A2RVM0	Short-chain dehydrogenase TIC 32, chloroplastic OS=Arabidopsis thaliana GN=TIC32 PE=2 SV=1
	c118697_g1	6.96304	2.79972
	c59822_g3	6.96184	2.79947	Q9ZR04	Putative cyclin-D6-1 OS=Arabidopsis thaliana GN=CYCD6-1 PE=3 SV=1
	c107810_g1	6.94868	2.79674	Q9LS40	Protein ASPARTIC PROTEASE IN GUARD CELL 1 OS=Arabidopsis thaliana GN=ASPG1 PE=1 SV=1
	c21789_g1	6.92882	2.79261	Q93VG8	DeSI-like protein At4g17486 OS=Arabidopsis thaliana GN=At4g17486 PE=2 SV=1
	c2560_g1	6.91924	2.79061	Q9LZS7	GDSL esterase/lipase At5g03610 OS=Arabidopsis thaliana GN=At5g03610 PE=2 SV=1
	c52535_g1	6.91554	2.78984	A4IJ27	Rop guanine nucleotide exchange factor 3 OS=Arabidopsis thaliana GN=ROPGEF3 PE=2 SV=1
	c12987_g1	6.90879	2.78843	Q8L7I0	Endoglucanase 19 OS=Arabidopsis thaliana GN=At4g11050 PE=2 SV=1
	c49450_g1	6.9083	2.78833	Q94JQ6	Cellulose synthase A catalytic subunit 6 [UDP-forming] OS=Arabidopsis thaliana GN=CESA6 PE=1 SV=2
	c33263_g2	6.90562	2.78777	I1KT36	Uncharacterized protein OS=Glycine max GN=GLYMA_08G137000 PE=4 SV=1
	c64945_g1	6.89856	2.78629	Q9S746	Protein HOTHEAD OS=Arabidopsis thaliana GN=HTH PE=1 SV=1
	c122003_g1	6.89593	2.78575	Q8LPF3	Probable pectinesterase 68 OS=Arabidopsis thaliana GN=PME68 PE=2 SV=1
	c44397_g1	6.88219	2.78287
	c45895_g2	6.87211	2.78075	Q39265	Zinc finger protein 6 OS=Arabidopsis thaliana GN=ZFP6 PE=2 SV=1
	c80607_g1	6.85469	2.77709
	c57750_g3	6.82489	2.77081	Q9FNI7	Glucomannan 4-beta-mannosyltransferase 2 OS=Arabidopsis thaliana GN=CSLA2 PE=2 SV=1
	c60947_g4	6.82438	2.7707	O48780	3-ketoacyl-CoA synthase 11 OS=Arabidopsis thaliana GN=KCS11 PE=2 SV=1
	c60661_g16	6.82124	2.77003
	c36876_g1	6.79251	2.76394	O65709	Long-chain-alcohol oxidase FAO4A OS=Arabidopsis thaliana GN=FAO4A PE=3 SV=2
	c66482_g1	6.79156	2.76374	Q9FM03	Dof zinc finger protein DOF5.6 OS=Arabidopsis thaliana GN=DOF5.6 PE=2 SV=2
	c61144_g1	6.7914	2.76371	Q96519	Peroxidase 11 OS=Arabidopsis thaliana GN=PER11 PE=1 SV=1
	c47357_g1	6.77165	2.75951	Q84WN3	Bidirectional sugar transporter SWEET17 OS=Arabidopsis thaliana GN=SWEET17 PE=2 SV=2
	c106884_g1	6.74752	2.75436	Q9FK81	Uncharacterized protein At5g22580 OS=Arabidopsis thaliana GN=At5g22580 PE=1 SV=1
	c61132_g4	6.74079	2.75292	Q9SSK5	MLP-like protein 43 OS=Arabidopsis thaliana GN=MLP43 PE=1 SV=1
	c61106_g1	6.73997	2.75274
	c93759_g1	6.72781	2.75014	Q43077	Primary amine oxidase OS=Pisum sativum PE=1 SV=1
	c33461_g1	6.72714	2.74999
	c53729_g1	6.72026	2.74852
	c62200_g4	6.7179	2.74801	Q9SX98	Lysine histidine transporter-like 8 OS=Arabidopsis thaliana GN=AATL1 PE=1 SV=1
	c61283_g4	6.71728	2.74788	Q9C7T4	Transcription factor bHLH96 OS=Arabidopsis thaliana GN=BHLH96 PE=2 SV=1
	c59753_g2	6.71114	2.74656	Q9ZV88	BES1/BZR1 homolog protein 4 OS=Arabidopsis thaliana GN=BEH4 PE=1 SV=1
	c26731_g2	6.7027	2.74474
	c59761_g1	6.69245	2.74253	Q7XHZ0	Heat stress transcription factor B-4b OS=Oryza sativa subsp. japonica GN=HSFB4B PE=1 SV=1
	c57075_g1	6.69245	2.74253	Q1PFD9	Protein trichome birefringence-like 31 OS=Arabidopsis thaliana GN=TBL31 PE=2 SV=1
	c53729_g2	6.68787	2.74155	Q9T0I5	Proline-rich protein 4 OS=Arabidopsis thaliana GN=PRP4 PE=2 SV=1
	c46247_g1	6.68741	2.74145	V7CPK7	Acyl-protein thioesterase 2 OS=Glycine soja GN=glysoja_031817 PE=4 SV=1
	c34383_g1	6.68673	2.7413	Q9SJB4	GDSL esterase/lipase At2g04570 OS=Arabidopsis thaliana GN=At2g04570 PE=2 SV=1
	c61247_g11	6.68599	2.74114
	c63284_g6	6.68499	2.74093	Q94BT9	Copper transport protein ATX1 OS=Arabidopsis thaliana GN=ATX1 PE=1 SV=1
	c124906_g1	6.68309	2.74052	Q0V7T5	Probable receptor-like protein kinase At1g80640 OS=Arabidopsis thaliana GN=At1g80640 PE=2 SV=1
	c52536_g4	6.68048	2.73995
	c50920_g1	6.67453	2.73867	P93830	Auxin-responsive protein IAA17 OS=Arabidopsis thaliana GN=IAA17 PE=1 SV=2
	c28925_g1	6.66618	2.73686
	c55879_g3	6.66483	2.73657	Q9M1K1	Transcription factor ORG2 OS=Arabidopsis thaliana GN=ORG2 PE=1 SV=1
	c78407_g1	6.66432	2.73646	Q9LUC5	Cytochrome P450 72A15 OS=Arabidopsis thaliana GN=CYP72A15 PE=2 SV=1
	c21465_g1	6.6627	2.73611	Q9XHC6	Beta-amyrin 24-hydroxylase OS=Glycine max GN=CYP93E1 PE=1 SV=1
	c56563_g2	6.66023	2.73557	Q9XHC6	Beta-amyrin 24-hydroxylase OS=Glycine max GN=CYP93E1 PE=1 SV=1
	c60436_g1	6.63678	2.73048	A6BM07	Isoflavone 7-O-glucosyltransferase 1 OS=Glycine max GN=GmIF7GT1 PE=1 SV=1
	c41571_g1	6.6294	2.72888	Q9SD39	Probable methyltransferase PMT27 OS=Arabidopsis thaliana GN=At3g51070 PE=3 SV=1
	c9486_g1	6.6265	2.72825	Q39529	Agglutinin-2 OS=Cladrastis kentukea PE=1 SV=1
	c61100_g5	6.62233	2.72734	Q8RX66	Serine/threonine-protein kinase Nek3 OS=Arabidopsis thaliana GN=NEK3 PE=2 SV=1
	c51107_g1	6.62042	2.72692
	c16844_g2	6.62042	2.72692	Q04108	Pathogenesis-related leaf protein 4 OS=Solanum lycopersicum PE=2 SV=1
	c33263_g1	6.61629	2.72602
	c57677_g1	6.60722	2.72404	Q9MAP7	Subtilisin-like protease SBT3.5 OS=Arabidopsis thaliana GN=SBT3.5 PE=1 SV=1
	c61247_g9	6.5983	2.72209
	c106663_g1	6.5977	2.72196	Q9T0I5	Proline-rich protein 4 OS=Arabidopsis thaliana GN=PRP4 PE=2 SV=1
	c129791_g1	6.59757	2.72194
	c56404_g1	6.59068	2.72043	P27061	Acid phosphatase 1 OS=Solanum lycopersicum GN=APS1 PE=2 SV=1
	c48321_g1	6.57815	2.71768	Q94AP3	Protein WALLS ARE THIN 1 OS=Arabidopsis thaliana GN=WAT1 PE=1 SV=1
	c56247_g2	6.56723	2.71529	Q9C7G1	U-box domain-containing protein 45 OS=Arabidopsis thaliana GN=PUB45 PE=1 SV=1
	c27192_g1	6.55873	2.71342
	c134545_g1	6.55539	2.71268
	c52291_g1	6.55539	2.71268
	c55894_g2	6.55539	2.71268	Q7XBH4	Myb-related protein Myb4 OS=Oryza sativa subsp. japonica GN=MYB4 PE=2 SV=2
	c56559_g2	6.55421	2.71242	Q9LXD9	Probable pectinesterase/pectinesterase inhibitor 51 OS=Arabidopsis thaliana GN=PME51 PE=2 SV=1
	c55336_g1	6.55007	2.71151	Q9SHE9	LOB domain-containing protein 4 OS=Arabidopsis thaliana GN=LBD4 PE=2 SV=1
	c47929_g3	6.54579	2.71057	Q93W32	Fasciclin-like arabinogalactan protein 18 OS=Arabidopsis thaliana GN=FLA18 PE=2 SV=1
	c60648_g1	6.54563	2.71053	Q9FYJ6	Transcription factor bHLH111 OS=Arabidopsis thaliana GN=BHLH111 PE=2 SV=1
	c53101_g1	6.54358	2.71008
	c53407_g3	6.53875	2.70901	Q9SRK7	Adenine/guanine permease AZG1 OS=Arabidopsis thaliana GN=AZG1 PE=2 SV=1
	c122379_g1	6.53855	2.70897	Q8W013	Caffeic acid 3-O-methyltransferase OS=Catharanthus roseus GN=COMT1 PE=2 SV=1
	c55759_g1	6.534	2.70797	Q9LVZ8	Protein LURP-one-related 12 OS=Arabidopsis thaliana GN=At3g15810 PE=2 SV=1
	c1456_g1	6.52855	2.70676	P13089	Auxin-induced protein AUX28 OS=Glycine max GN=AUX28 PE=2 SV=1
	c121105_g1	6.52595	2.70619	Q9LIS1	Protein ECERIFERUM 26-like OS=Arabidopsis thaliana GN=CER26L PE=2 SV=1
	c61607_g7	6.52467	2.70591	Q9MAJ7	Beta-galactosidase 5 OS=Arabidopsis thaliana GN=BGAL5 PE=2 SV=1
	c73656_g1	6.51675	2.70415
	c58730_g6	6.5062	2.70181	Q8LPG9	Protein IQ-DOMAIN 14 OS=Arabidopsis thaliana GN=IQD14 PE=1 SV=1
	c121863_g1	6.50589	2.70175	Q41001	Blue copper protein OS=Pisum sativum PE=2 SV=1
	c23614_g1	6.50333	2.70118	Q40220	Rac-like GTP-binding protein RAC2 OS=Lotus japonicus GN=RAC2 PE=2 SV=1
	c37817_g1	6.5027	2.70104	Q9SLN8	2-alkenal reductase (NADP(+)-dependent) OS=Nicotiana tabacum GN=DBR PE=1 SV=1
	c16663_g1	6.5027	2.70104
	c40133_g1	6.50196	2.70087
	c55293_g4	6.50107	2.70068	Q8LFN2	Probable inactive leucine-rich repeat receptor-like protein kinase At3g03770 OS=Arabidopsis thaliana GN=At3g03770 PE=2 SV=1
	c97804_g1	6.501	2.70066	Q9M160	Uncharacterized protein At4g00950 OS=Arabidopsis thaliana GN=At4g00950 PE=2 SV=1
	c41407_g2	6.49402	2.69911	Q00874	DNA-damage-repair/toleration protein DRT100 OS=Arabidopsis thaliana GN=DRT100 PE=2 SV=2
	c62529_g4	6.49267	2.69881	Q38914	AP2-like ethylene-responsive transcription factor ANT OS=Arabidopsis thaliana GN=ANT PE=1 SV=2
	c19652_g1	6.48965	2.69814	Q6DR24	Uncharacterized protein At3g17950 OS=Arabidopsis thaliana GN=Y-3 PE=1 SV=1
	c54534_g4	6.45914	2.69134	Q8GYY5	Rho GTPase-activating protein 3 OS=Arabidopsis thaliana GN=ROPGAP3 PE=2 SV=1
	c55518_g4	6.45057	2.68943	P32295	Indole-3-acetic acid-induced protein ARG7 OS=Vigna radiata var. radiata GN=ARG7 PE=2 SV=1
	c79605_g1	6.44238	2.68759
	c56240_g3	6.44126	2.68734	Q9FM03	Dof zinc finger protein DOF5.6 OS=Arabidopsis thaliana GN=DOF5.6 PE=2 SV=2
	c81485_g1	6.4267	2.68408	O23617	Alpha,alpha-trehalose-phosphate synthase [UDP-forming] 5 OS=Arabidopsis thaliana GN=TPS5 PE=1 SV=2
	c62529_g3	6.42571	2.68386
	c134417_g1	6.42571	2.68386	Q9M0G7	Leucine-rich repeat receptor-like protein kinase PXL2 OS=Arabidopsis thaliana GN=PXL2 PE=2 SV=1
	c134451_g1	6.4177	2.68206
	c55992_g4	6.41253	2.68089
	c122308_g1	6.41169	2.68071	D4Q9Z5	Soyasaponin III rhamnosyltransferase OS=Glycine max GN=GmSGT3 PE=1 SV=1
	c67118_g1	6.40782	2.67983	Q9C7R6	U-box domain-containing protein 17 OS=Arabidopsis thaliana GN=PUB17 PE=2 SV=1
	c61054_g3	6.40748	2.67976	A7PZL3	Probable polygalacturonase OS=Vitis vinifera GN=GSVIVT00026920001 PE=1 SV=1
	c57889_g3	6.40607	2.67944
	c54236_g1	6.40043	2.67817
	c28593_g1	6.39318	2.67653	Q9FHQ1	GDSL esterase/lipase At5g37690 OS=Arabidopsis thaliana GN=At5g37690 PE=2 SV=1
	c32913_g1	6.38239	2.6741
	c36104_g1	6.3808	2.67374	Q9LY41	E3 ubiquitin-protein ligase ATL4 OS=Arabidopsis thaliana GN=ATL4 PE=1 SV=1
	c49184_g1	6.37248	2.67186	P45458	Malate synthase, glyoxysomal (Fragment) OS=Glycine max PE=2 SV=1
	c59251_g1	6.35566	2.66804	O23693	MLO-like protein 4 OS=Arabidopsis thaliana GN=MLO4 PE=2 SV=2
	c80656_g1	6.34575	2.66579
	c55816_g2	6.33041	2.6623
	c36775_g1	6.32515	2.6611	Q9LT96	Probable leucine-rich repeat receptor-like protein kinase At5g49770 OS=Arabidopsis thaliana GN=At5g49770 PE=2 SV=1
	c145339_g1	6.32034	2.66	O04886	Pectinesterase 1 OS=Citrus sinensis GN=PECS-1.1 PE=2 SV=1
	c79099_g1	6.32034	2.66
	c61098_g2	6.31747	2.65935	O64481	Subtilisin-like protease SBT2.5 OS=Arabidopsis thaliana GN=SBT2.5 PE=2 SV=1
	c57328_g1	6.31747	2.65935	Q9XGW1	Protein argonaute 10 OS=Arabidopsis thaliana GN=AGO10 PE=2 SV=1
	c51816_g2	6.31183	2.65806
	c60864_g1	6.31146	2.65797	C0LGF4	LRR receptor-like serine/threonine-protein kinase FEI 1 OS=Arabidopsis thaliana GN=FEI1 PE=1 SV=1
	c54236_g2	6.31067	2.65779
	c121057_g1	6.31052	2.65776	Q41350	Osmotin-like protein OS=Solanum lycopersicum PE=1 SV=1
	c48000_g1	6.29563	2.65435	Q9T0K5	Leucine-rich repeat extensin-like protein 3 OS=Arabidopsis thaliana GN=LRX3 PE=1 SV=1
	c54032_g2	6.29563	2.65435
	c15002_g1	6.28583	2.6521
	c60208_g5	6.28434	2.65176	P32293	Auxin-induced protein 22A OS=Vigna radiata var. radiata GN=AUX22A PE=2 SV=1
	c120680_g1	6.2823	2.65129
	c132703_g1	6.26304	2.64686	Q6NQE2	Probable NAD(P)H dehydrogenase (quinone) FQR1-like 1 OS=Arabidopsis thaliana GN=At4g27270 PE=2 SV=1
	c48178_g1	6.26216	2.64666	Q6R2J8	Protein STRUBBELIG-RECEPTOR FAMILY 8 OS=Arabidopsis thaliana GN=SRF8 PE=2 SV=1
	c49560_g2	6.25989	2.64614
	c48124_g1	6.2589	2.64591	Q8S8N6	Phospholipase A2-alpha OS=Arabidopsis thaliana GN=PLA2-ALPHA PE=1 SV=1
	c45895_g1	6.25573	2.64518	Q39265	Zinc finger protein 6 OS=Arabidopsis thaliana GN=ZFP6 PE=2 SV=1
	c28998_g2	6.24888	2.6436
	c50003_g2	6.24707	2.64318	P32295	Indole-3-acetic acid-induced protein ARG7 OS=Vigna radiata var. radiata GN=ARG7 PE=2 SV=1
	c137377_g1	6.24361	2.64238	Q8H038	Xyloglucan galactosyltransferase KATAMARI1 homolog OS=Oryza sativa subsp. japonica GN=Os03g0144800 PE=2 SV=1
	c34455_g1	6.24127	2.64184	Q9M401	Branched-chain-amino-acid aminotransferase 3, chloroplastic OS=Arabidopsis thaliana GN=BCAT3 PE=1 SV=1
	c56813_g1	6.22807	2.63878	F4I037	Protein trichome berefringence-like 7 OS=Arabidopsis thaliana GN=TBL7 PE=3 SV=1
	c55071_g4	6.22335	2.63769
	c59502_g3	6.21999	2.63691	Q84VY3	Acyl-[acyl-carrier-protein] desaturase 6, chloroplastic OS=Arabidopsis thaliana GN=S-ACP-DES6 PE=2 SV=2
	c42619_g1	6.20645	2.63377	O22881	Potassium transporter 2 OS=Arabidopsis thaliana GN=POT2 PE=1 SV=2
	c61764_g1	6.19993	2.63225
	c126985_g1	6.19964	2.63219	O82232	UPF0057 membrane protein At2g24040 OS=Arabidopsis thaliana GN=At2g24040 PE=3 SV=1
	c60127_g14	6.198	2.6318	D4Q9Z4	Soyasapogenol B glucuronide galactosyltransferase OS=Glycine max GN=GmSGT2 PE=1 SV=1
	c29125_g1	6.19403	2.63088	Q9FNI7	Glucomannan 4-beta-mannosyltransferase 2 OS=Arabidopsis thaliana GN=CSLA2 PE=2 SV=1
	c60914_g12	6.18459	2.62868	Q6LA43	Two-component response regulator-like APRR2 OS=Arabidopsis thaliana GN=APRR2 PE=2 SV=2
	c43702_g1	6.17239	2.62583
	c62360_g3	6.16883	2.625	Q9ZPS9	Serine/threonine-protein kinase BRI1-like 2 OS=Arabidopsis thaliana GN=BRL2 PE=1 SV=1
	c128452_g1	6.15808	2.62248
	c61100_g2	6.15808	2.62248
	c39225_g2	6.15694	2.62221
	c51797_g2	6.155	2.62176	Q9LQ32	Glucuronoxylan 4-O-methyltransferase 3 OS=Arabidopsis thaliana GN=GXM3 PE=1 SV=1
	c59182_g2	6.14791	2.6201	Q5HZ36	GATA transcription factor 21 OS=Arabidopsis thaliana GN=GATA21 PE=1 SV=2
	c60740_g1	6.14197	2.6187
	c33747_g2	6.14141	2.61857	P52410	3-oxoacyl-[acyl-carrier-protein] synthase I, chloroplastic OS=Arabidopsis thaliana GN=KAS1 PE=2 SV=2
	c47663_g1	6.13519	2.61711
	c50790_g2	6.1321	2.61638	O24541	Auxin-induced protein 22C OS=Vigna radiata var. radiata GN=AUX22C PE=2 SV=1
	c121178_g1	6.11375	2.61206	H2DH21	Cytochrome P450 CYP72A219 OS=Panax ginseng PE=2 SV=1
	c27929_g1	6.11253	2.61177
	c46503_g1	6.1044	2.60985	Q9M160	Uncharacterized protein At4g00950 OS=Arabidopsis thaliana GN=At4g00950 PE=2 SV=1
	c60450_g2	6.10347	2.60963	Q949Z1	Polygalacturonase At1g48100 OS=Arabidopsis thaliana GN=At1g48100 PE=2 SV=1
	c40158_g2	6.10198	2.60928	F4IH21	Protein trichome birefringence-like 33 OS=Arabidopsis thaliana GN=TBL33 PE=2 SV=1
	c62560_g2	6.09533	2.6077	Q9M4A2	Meiotic recombination protein SPO11-1 OS=Arabidopsis thaliana GN=SPO11-1 PE=1 SV=1
	c44616_g1	6.08931	2.60628
	c58294_g2	6.08243	2.60465	O22227	Protein MIZU-KUSSEI 1 OS=Arabidopsis thaliana GN=MIZ1 PE=1 SV=1
	c134356_g1	6.07802	2.6036	Q9SS80	UPF0503 protein At3g09070, chloroplastic OS=Arabidopsis thaliana GN=At3g09070 PE=1 SV=1
	c54241_g2	6.07088	2.6019	Q8H4S4	NAC transcription factor ONAC010 OS=Oryza sativa subsp. japonica GN=ONAC010 PE=2 SV=1
	c98632_g1	6.07004	2.60171	Q8GT41	Putative invertase inhibitor OS=Platanus acerifolia PE=1 SV=1
	c111348_g1	6.06646	2.60085
	c135731_g1	6.06322	2.60008	Q9SU40	Monocopper oxidase-like protein SKU5 OS=Arabidopsis thaliana GN=SKU5 PE=1 SV=1
	c22090_g1	6.05761	2.59875
	c51436_g4	6.04838	2.59655	Q9SSK5	MLP-like protein 43 OS=Arabidopsis thaliana GN=MLP43 PE=1 SV=1
	c61129_g2	6.03995	2.59454	Q9LUI1	Leucine-rich repeat extensin-like protein 6 OS=Arabidopsis thaliana GN=LRX6 PE=2 SV=1
	c11859_g1	6.01921	2.58957
	c56546_g2	6.01359	2.58823
	c60867_g2	6.01217	2.58789	Q52QU2	AP2-like ethylene-responsive transcription factor AIL6 OS=Arabidopsis thaliana GN=AIL6 PE=2 SV=1
	c82274_g1	6.00947	2.58724	Q94JQ6	Cellulose synthase A catalytic subunit 6 [UDP-forming] OS=Arabidopsis thaliana GN=CESA6 PE=1 SV=2
	c36158_g2	6.0089	2.5871	P13917	Basic 7S globulin OS=Glycine max GN=BG PE=1 SV=2
	c51731_g1	5.99759	2.58438	Q8LPG9	Protein IQ-DOMAIN 14 OS=Arabidopsis thaliana GN=IQD14 PE=1 SV=1
	c60782_g4	5.99636	2.58409
	c60491_g2	5.99466	2.58368	Q0WUU6	Probable polyol transporter 4 OS=Arabidopsis thaliana GN=PLT4 PE=2 SV=1
	c62277_g11	5.98144	2.58049	Q9LVM0	Probable inactive receptor kinase At5g58300 OS=Arabidopsis thaliana GN=At5g58300 PE=2 SV=1
	c34842_g1	5.97703	2.57943	Q9SJ22	Probable cellulose synthase A catalytic subunit 9 [UDP-forming] OS=Arabidopsis thaliana GN=CESA9 PE=2 SV=1
	c52354_g2	5.96822	2.5773	P30171	Actin-97 OS=Solanum tuberosum GN=AC97 PE=1 SV=1
	c59186_g1	5.96682	2.57696	O80823	Cytochrome P450 86A8 OS=Arabidopsis thaliana GN=CYP86A8 PE=2 SV=1
	c94383_g1	5.95759	2.57473
	c56915_g2	5.95486	2.57407	Q9ZQC5	Interactor of constitutive active ROPs 2, chloroplastic OS=Arabidopsis thaliana GN=ICR2 PE=1 SV=1
	c107836_g1	5.94954	2.57278
	c40360_g1	5.9482	2.57245
	c94575_g1	5.9424	2.57105	Q9SUM5	Uncharacterized protein At4g30180 OS=Arabidopsis thaliana GN=At4g30180 PE=2 SV=1
	c9093_g1	5.93213	2.56855	Q940Z5	Phenolic glucoside malonyltransferase 1 OS=Arabidopsis thaliana GN=PMAT1 PE=1 SV=1
	c49543_g4	5.92101	2.56584	Q9C5U0	Histidine kinase 4 OS=Arabidopsis thaliana GN=AHK4 PE=1 SV=1
	c60384_g1	5.91535	2.56446	A0A0B2SA26	ELMO domain-containing protein A OS=Glycine soja GN=glysoja_017183 PE=4 SV=1
	c44862_g1	5.88992	2.55825	Q8L8B8	Cytokinin riboside 5'-monophosphate phosphoribohydrolase LOG3 OS=Arabidopsis thaliana GN=LOG3 PE=1 SV=1
	c56540_g4	5.88476	2.55698	Q9ZQC5	Interactor of constitutive active ROPs 2, chloroplastic OS=Arabidopsis thaliana GN=ICR2 PE=1 SV=1
	c37525_g1	5.88168	2.55623	A0A0R0FEG5	Uncharacterized protein OS=Glycine max GN=GLYMA_17G176200 PE=4 SV=1
	c62762_g9	5.85429	2.5495	Q9S7Y1	Transcription factor bHLH30 OS=Arabidopsis thaliana GN=BHLH30 PE=1 SV=1
	c60112_g1	5.85378	2.54937	Q9LT96	Probable leucine-rich repeat receptor-like protein kinase At5g49770 OS=Arabidopsis thaliana GN=At5g49770 PE=2 SV=1
	c122260_g1	5.84397	2.54695
	c55745_g2	5.83067	2.54366	A2WSD3	Bidirectional sugar transporter SWEET6b OS=Oryza sativa subsp. indica GN=SWEET6B PE=3 SV=1
	c108532_g1	5.82816	2.54304	O80970	BTB/POZ domain-containing protein NPY2 OS=Arabidopsis thaliana GN=NPY2 PE=2 SV=1
	c49182_g1	5.8198	2.54097
	c32914_g1	5.79196	2.53405	P93830	Auxin-responsive protein IAA17 OS=Arabidopsis thaliana GN=IAA17 PE=1 SV=2
	c130700_g1	5.78518	2.53236
	c107320_g1	5.77741	2.53042	O81032	Probable L-gulonolactone oxidase 6 OS=Arabidopsis thaliana GN=GULLO6 PE=3 SV=1
	c73500_g1	5.7749	2.5298
	c60460_g1	5.76188	2.52654	Q6NMB7	WAT1-related protein At1g43650 OS=Arabidopsis thaliana GN=At1g43650 PE=2 SV=1
	c58840_g1	5.75582	2.52502
	c122250_g1	5.75464	2.52473
	c53251_g1	5.70822	2.51304
	c56256_g1	5.70632	2.51256	Q9SVY1	Zinc finger protein WIP2 OS=Arabidopsis thaliana GN=WIP2 PE=1 SV=1
	c48517_g1	5.67214	2.50389
	c67368_g1	5.67076	2.50354	Q5E930	S-type anion channel SLAH1 OS=Arabidopsis thaliana GN=SLAH1 PE=2 SV=1
	c84944_g1	5.66346	2.50168	Q41951	Aquaporin TIP2-1 OS=Arabidopsis thaliana GN=TIP2-1 PE=1 SV=2
	c57179_g2	5.64722	2.49754	Q9LFS4	Protein NSP-INTERACTING KINASE 1 OS=Arabidopsis thaliana GN=NIK1 PE=1 SV=1
	c39220_g2	5.63446	2.49428	C6TBD0	CASP-like protein 1E1 OS=Glycine max PE=2 SV=1
	c57584_g2	5.62202	2.49109
	c38710_g3	5.62015	2.49061	Q9M9C5	Probable leucine-rich repeat receptor-like protein kinase At1g68400 OS=Arabidopsis thaliana GN=At1g68400 PE=2 SV=1
	c65731_g1	5.60121	2.48574	Q8LEJ6	Fasciclin-like arabinogalactan protein 11 OS=Arabidopsis thaliana GN=FLA11 PE=2 SV=2
	c56439_g1	5.59679	2.4846
	c5903_g1	5.59397	2.48387
	c56230_g1	5.54543	2.4713	Q8LE43	Dof zinc finger protein DOF2.1 OS=Arabidopsis thaliana GN=DOF2.1 PE=2 SV=2
	c106324_g1	5.53595	2.46883	O23262	Protein RALF-like 32 OS=Arabidopsis thaliana GN=RALFL32 PE=3 SV=1
	c53923_g4	0.180391	-2.4708	Q8L6J4	DNA-directed RNA polymerase 1A (Fragment) OS=Nicotiana tabacum GN=RPOT1-SYL PE=3 SV=2
	c43311_g1	0.178922	-2.4826
	c58014_g1	0.178843	-2.48323
	c93165_g1	0.178134	-2.48896
	c2766_g1	0.178096	-2.48927	O22300	Homeobox protein knotted-1-like LET12 OS=Solanum lycopersicum GN=LET12 PE=2 SV=1
	c110152_g1	0.177165	-2.49684
	c63778_g2	0.177114	-2.49725	P10978	Retrovirus-related Pol polyprotein from transposon TNT 1-94 OS=Nicotiana tabacum PE=2 SV=1
	c38211_g1	0.176731	-2.50038	Q9ZSI7	Probable WRKY transcription factor 47 OS=Arabidopsis thaliana GN=WRKY47 PE=2 SV=2
	c56987_g4	0.175527	-2.51024	Q8GV43	Phosphoinositide phospholipase C 6 OS=Arabidopsis thaliana GN=PLC6 PE=2 SV=2
	c23532_g1	0.175512	-2.51036
	c60200_g6	0.17448	-2.51886	P49044	Vacuolar-processing enzyme OS=Vicia sativa PE=1 SV=1
	c61512_g8	0.174426	-2.51931	Q6YU51	Probable 1-deoxy-D-xylulose-5-phosphate synthase 2, chloroplastic OS=Oryza sativa subsp. japonica GN=Os07g0190000 PE=2 SV=1
	c124232_g1	0.174002	-2.52282
	c2886_g1	0.173989	-2.52293
	c56688_g1	0.173826	-2.52429	Q9SZ42	Fatty acid desaturase 4, chloroplastic OS=Arabidopsis thaliana GN=FAD4 PE=2 SV=1
	c61536_g14	0.173629	-2.52592
	c130624_g1	0.173207	-2.52943
	c16015_g1	0.172405	-2.53612	Q1A173	Protein RADIALIS-like 6 OS=Arabidopsis thaliana GN=RL6 PE=2 SV=1
	c121267_g1	0.172213	-2.53774	Q9LVC0	Arabinogalactan peptide 14 OS=Arabidopsis thaliana GN=AGP14 PE=1 SV=1
	c52841_g1	0.171958	-2.53987
	c27490_g1	0.171942	-2.54001
	c93992_g1	0.171844	-2.54083	Q0DXZ1	Cellulose synthase-like protein E2 OS=Oryza sativa subsp. japonica GN=CSLE2 PE=2 SV=1
	c55159_g1	0.17168	-2.54221	O49841	Ras-related protein RABC2a OS=Arabidopsis thaliana GN=RABC2A PE=1 SV=1
	c5346_g1	0.171547	-2.54332	Q9SAG8	Chaperone protein dnaJ 8, chloroplastic OS=Arabidopsis thaliana GN=ATJ8 PE=2 SV=1
	c55963_g2	0.171372	-2.5448	P24465	Cytochrome P450 71A1 OS=Persea americana GN=CYP71A1 PE=1 SV=2
	c55037_g4	0.17083	-2.54937	C0LGD7	Probable LRR receptor-like serine/threonine-protein kinase At1g06840 OS=Arabidopsis thaliana GN=At1g06840 PE=2 SV=2
	c47270_g1	0.170815	-2.5495	Q93VD3	CBL-interacting serine/threonine-protein kinase 23 OS=Arabidopsis thaliana GN=CIPK23 PE=1 SV=1
	c55021_g1	0.170746	-2.55008	Q40541	Mitogen-activated protein kinase kinase kinase NPK1 OS=Nicotiana tabacum GN=NPK1 PE=1 SV=1
	c107222_g1	0.17059	-2.5514	Q39088	Dof zinc finger protein DOF3.4 OS=Arabidopsis thaliana GN=DOF3.4 PE=1 SV=2
	c104384_g1	0.170218	-2.55454
	c56721_g1	0.169895	-2.55728	Q56WD9	3-ketoacyl-CoA thiolase 2, peroxisomal OS=Arabidopsis thaliana GN=PED1 PE=1 SV=2
	c41611_g1	0.169764	-2.55839
	c58099_g1	0.169405	-2.56145	Q8VWZ7	Geraniol 8-hydroxylase OS=Catharanthus roseus GN=CYP76B6 PE=1 SV=1
	c49763_g1	0.169388	-2.5616	Q9SQ80	Gibberellin 2-beta-dioxygenase 1 OS=Pisum sativum GN=GA2OX1 PE=1 SV=1
	c79327_g1	0.16916	-2.56354
	c136912_g1	0.169	-2.56491
	c58971_g1	0.168694	-2.56752	A0A151TCL0	Hippocampus abundant transcript-like protein 1 OS=Cajanus cajan GN=KK1_019395 PE=4 SV=1
	c57752_g1	0.168517	-2.56903
	c48265_g1	0.168241	-2.5714
	c50387_g2	0.168179	-2.57193	P30359	Probable cinnamyl alcohol dehydrogenase 1 OS=Nicotiana tabacum GN=CAD14 PE=1 SV=1
	c54903_g1	0.168165	-2.57205
	c62097_g5	0.168118	-2.57245
	c59155_g1	0.16793	-2.57407	Q0JF58	Protein argonaute 4B OS=Oryza sativa subsp. japonica GN=AGO4B PE=2 SV=1
	c106461_g1	0.167614	-2.57678	Q67YC0	Inorganic pyrophosphatase 1 OS=Arabidopsis thaliana GN=PS2 PE=1 SV=1
	c52232_g1	0.167594	-2.57696	P27054	Endochitinase PR4 OS=Phaseolus vulgaris GN=CHI4 PE=2 SV=1
	c52071_g1	0.167303	-2.57946	Q6NLC8	Uncharacterized protein At1g66480 OS=Arabidopsis thaliana GN=At1g66480 PE=2 SV=1
	c56127_g3	0.166839	-2.58347	O49500	E3 ubiquitin-protein ligase MBR2 OS=Arabidopsis thaliana GN=MBR2 PE=1 SV=1
	c36306_g1	0.166777	-2.58401	A0A0B2RU89	Peroxisomal membrane protein 2 OS=Glycine soja GN=glysoja_001346 PE=4 SV=1
	c61020_g4	0.166386	-2.58739
	c135310_g1	0.166343	-2.58777	Q6AVI0	Zinc finger BED domain-containing protein RICESLEEPER 2 OS=Oryza sativa subsp. japonica GN=Os03g0733400 PE=2 SV=1
	c44479_g1	0.166315	-2.58801
	c59706_g1	0.1663	-2.58814	Q42572	DNA ligase 1 OS=Arabidopsis thaliana GN=LIG1 PE=2 SV=2
	c112788_g1	0.166167	-2.5893	Q9ZQG9	Glucan endo-1,3-beta-glucosidase 14 OS=Arabidopsis thaliana GN=At2g27500 PE=1 SV=2
	c46899_g2	0.166135	-2.58957	Q6Z1D5	Autophagy-related protein 8C OS=Oryza sativa subsp. japonica GN=ATG8C PE=2 SV=1
	c140396_g1	0.166135	-2.58957
	c63602_g9	0.166098	-2.58989	O24059	Metallothionein-like protein type 3 OS=Malus domestica GN=MT2 PE=3 SV=1
	c137429_g1	0.166008	-2.59068
	c86078_g1	0.165922	-2.59142	Q9FZ62	Inorganic pyrophosphatase 2 OS=Arabidopsis thaliana GN=At1g17710 PE=2 SV=1
	c107472_g1	0.165685	-2.59348	Q84JK8	Probable membrane-associated kinase regulator 6 OS=Arabidopsis thaliana GN=MAKR6 PE=2 SV=1
	c58926_g1	0.165577	-2.59442
	c13389_g1	0.165033	-2.59917
	c42750_g1	0.164689	-2.60218	B6VJS4	Trans-resveratrol di-O-methyltransferase OS=Vitis vinifera GN=ROMT PE=1 SV=2
	c140755_g1	0.164679	-2.60227	Q1ECI2	Ethylene-responsive transcription factor ERF023 OS=Arabidopsis thaliana GN=ERF023 PE=2 SV=1
	c57433_g2	0.164641	-2.60261	Q9STX0	Probable WRKY transcription factor 7 OS=Arabidopsis thaliana GN=WRKY7 PE=2 SV=1
	c30298_g1	0.164045	-2.60784
	c8636_g1	0.163998	-2.60825
	c37390_g1	0.163925	-2.60889	Q9C9G4	Endonuclease 2 OS=Arabidopsis thaliana GN=ENDO2 PE=1 SV=1
	c106262_g1	0.163625	-2.61153
	c59189_g2	0.163614	-2.61163	Q6R567	E3 ubiquitin-protein ligase RMA1H1 OS=Capsicum annuum GN=RMA1H1 PE=1 SV=1
	c61094_g1	0.163598	-2.61177
	c63327_g16	0.163598	-2.61177	Q9LM15	Ethylene-responsive transcription factor RAP2-13 OS=Arabidopsis thaliana GN=RAP2-13 PE=1 SV=1
	c43359_g3	0.163517	-2.61249	Q9LQ10	Probable aminotransferase ACS10 OS=Arabidopsis thaliana GN=ACS10 PE=1 SV=1
	c84804_g1	0.163405	-2.61348
	c3157_g1	0.163104	-2.61613	F8WKW0	Crocetin glucosyltransferase, chloroplastic OS=Gardenia jasminoides GN=UGT75L6 PE=1 SV=1
	c125117_g1	0.163076	-2.61638
	c3350_g1	0.163023	-2.61685	Q8H1S0	Inositol oxygenase 4 OS=Arabidopsis thaliana GN=MIOX4 PE=2 SV=1
	c54129_g1	0.162628	-2.62035	Q9LMK2	Protein LIGHT-DEPENDENT SHORT HYPOCOTYLS 6 OS=Arabidopsis thaliana GN=LSH6 PE=1 SV=1
	c119967_g1	0.162388	-2.62248
	c56135_g2	0.162388	-2.62248
	c53058_g1	0.162356	-2.62276	A0A0B2QR79	Vacuolar amino acid transporter 1 (Fragment) OS=Glycine soja GN=glysoja_033056 PE=4 SV=1
	c66600_g1	0.162227	-2.62391
	c54622_g2	0.162122	-2.62484	P80022	Extracellular ribonuclease LE OS=Solanum lycopersicum PE=1 SV=2
	c41931_g1	0.162081	-2.62521
	c4939_g1	0.162081	-2.62521
	c55758_g2	0.161881	-2.62699
	c32274_g1	0.161726	-2.62838
	c70605_g1	0.161664	-2.62893
	c4561_g1	0.161234	-2.63277	P49299	Citrate synthase, glyoxysomal OS=Cucurbita maxima PE=1 SV=1
	c38919_g1	0.160877	-2.63597	A0A0B2SQ15	DnaJ like subfamily B member 13 OS=Glycine soja GN=glysoja_018377 PE=4 SV=1
	c58704_g1	0.160754	-2.63707
	c25230_g1	0.160595	-2.6385	P09886	Small heat shock protein, chloroplastic OS=Pisum sativum GN=HSP21 PE=2 SV=1
	c62072_g1	0.16025	-2.64161
	c20284_g1	0.159935	-2.64444
	c121942_g1	0.15971	-2.64647
	c120483_g1	0.159645	-2.64706
	c49620_g1	0.15956	-2.64783	Q9SZN7	Heavy metal-associated isoprenylated plant protein 26 OS=Arabidopsis thaliana GN=HIPP26 PE=1 SV=1
	c9835_g1	0.159351	-2.64972	Q9ZW82	Pirin-like protein At2g43120 OS=Arabidopsis thaliana GN=At2g43120 PE=2 SV=3
	c51703_g1	0.159326	-2.64995
	c27045_g1	0.158781	-2.65489	Q9ZWB4	Coumaroyl-CoA:anthocyanidin 3-O-glucoside-6''-O-coumaroyltransferase 1 OS=Arabidopsis thaliana GN=3AT1 PE=1 SV=1
	c56504_g2	0.15849	-2.65754	P51273	Uncharacterized protein ycf36 OS=Porphyra purpurea GN=ycf36 PE=3 SV=1
	c59136_g2	0.158485	-2.65758	Q0WQQ1	Probable ADP-ribosylation factor GTPase-activating protein AGD15 OS=Arabidopsis thaliana GN=AGD15 PE=2 SV=1
	c54962_g2	0.158405	-2.65831
	c52961_g2	0.15834	-2.6589	Q05349	Auxin-repressed 12.5 kDa protein OS=Fragaria ananassa PE=2 SV=1
	c46429_g1	0.158219	-2.66
	c18471_g1	0.158148	-2.66065	Q3ECH2	Probable receptor-like protein kinase At1g67000 OS=Arabidopsis thaliana GN=At1g67000 PE=2 SV=2
	c57645_g2	0.158038	-2.66166	B3SGL0	Beta-carotene 3-hydroxylase, chloroplastic OS=Gentiana lutea GN=BHY PE=2 SV=1
	c95734_g1	0.158018	-2.66184	O48781	SPX domain-containing protein 2 OS=Arabidopsis thaliana GN=SPX2 PE=2 SV=1
	c60749_g3	0.157635	-2.66534	Q9C942	Caffeoylshikimate esterase OS=Arabidopsis thaliana GN=CSE PE=1 SV=1
	c121797_g1	0.157623	-2.66545
	c69624_g1	0.157586	-2.66579
	c64597_g1	0.157398	-2.66751	O48781	SPX domain-containing protein 2 OS=Arabidopsis thaliana GN=SPX2 PE=2 SV=1
	c60981_g6	0.157375	-2.66772	P57758	Cystinosin homolog OS=Arabidopsis thaliana GN=At5g40670 PE=2 SV=1
	c92748_g1	0.157277	-2.66862
	c62123_g3	0.156899	-2.67209
	c128482_g1	0.15679	-2.67309	P93022	Auxin response factor 7 OS=Arabidopsis thaliana GN=ARF7 PE=1 SV=2
	c60409_g3	0.156496	-2.6758	Q84MB3	1-aminocyclopropane-1-carboxylate oxidase homolog 1 OS=Arabidopsis thaliana GN=At1g06620 PE=2 SV=1
	c30002_g1	0.156421	-2.67649	P93022	Auxin response factor 7 OS=Arabidopsis thaliana GN=ARF7 PE=1 SV=2
	c9191_g1	0.156405	-2.67664
	c60823_g1	0.156271	-2.67787	D7SFH9	Glycerophosphodiester phosphodiesterase protein kinase domain-containing GDPDL2 OS=Arabidopsis thaliana GN=GDPDL2 PE=1 SV=1
	c57076_g4	0.156152	-2.67898	Q9SXB4	G-type lectin S-receptor-like serine/threonine-protein kinase At1g11300 OS=Arabidopsis thaliana GN=At1g11300 PE=2 SV=1
	c60201_g1	0.156121	-2.67927	Q9FH32	Autophagy-related protein 18f OS=Arabidopsis thaliana GN=ATG18F PE=2 SV=1
	c93207_g1	0.156095	-2.6795
	c60327_g5	0.156076	-2.67968	A0A0B2ST24	SH3 domain-containing protein OS=Glycine soja GN=glysoja_020255 PE=4 SV=1
	c52043_g1	0.155945	-2.68089	Q9SGA8	UDP-glycosyltransferase 83A1 OS=Arabidopsis thaliana GN=UGT83A1 PE=2 SV=1
	c78217_g1	0.155733	-2.68286	Q9FPN0	Bidirectional sugar transporter NEC1 OS=Petunia hybrida GN=NEC1 PE=2 SV=1
	c55646_g2	0.155583	-2.68424	Q93VH2	Bifunctional nuclease 2 OS=Arabidopsis thaliana GN=BBD2 PE=2 SV=1
	c50460_g3	0.155518	-2.68484	A0A151R9J6	Putative transporter C5D6.04 OS=Cajanus cajan GN=KK1_039542 PE=4 SV=1
	c47184_g2	0.155444	-2.68553
	c49681_g1	0.155444	-2.68553	Q9FJV7	Calcium uniporter protein 4, mitochondrial OS=Arabidopsis thaliana GN=At5g42610 PE=2 SV=1
	c95266_g1	0.15542	-2.68575	Q84MC0	Uncharacterized GPI-anchored protein At3g06035 OS=Arabidopsis thaliana GN=At3g06035 PE=2 SV=1
	c23330_g1	0.155365	-2.68626
	c55097_g3	0.155142	-2.68834	O49523	Phospholipase A1-IIgamma OS=Arabidopsis thaliana GN=DSEL PE=1 SV=1
	c64030_g1	0.155109	-2.68864
	c122085_g1	0.155097	-2.68876
	c61269_g1	0.155025	-2.68943
	c65506_g1	0.155025	-2.68943
	c47206_g2	0.155013	-2.68954	Q9LSW8	Electron transfer flavoprotein subunit beta, mitochondrial OS=Arabidopsis thaliana GN=ETFB PE=1 SV=1
	c45396_g2	0.154682	-2.69262	P93788	Remorin OS=Solanum tuberosum PE=1 SV=1
	c78262_g1	0.154579	-2.69358	P49045	Vacuolar-processing enzyme OS=Glycine max PE=2 SV=1
	c136863_g1	0.154366	-2.69557
	c128258_g1	0.154366	-2.69557
	c137783_g1	0.154284	-2.69634
	c120360_g1	0.154264	-2.69652
	c72589_g1	0.154201	-2.69712	Q56XP4	Sodium/hydrogen exchanger 2 OS=Arabidopsis thaliana GN=NHX2 PE=2 SV=2
	c60845_g5	0.154008	-2.69893	P92983	Proline dehydrogenase 1, mitochondrial OS=Arabidopsis thaliana GN=POX1 PE=1 SV=2
	c443_g1	0.153825	-2.70063	Q9FGK4	Cytochrome b561 and DOMON domain-containing protein At5g47530 OS=Arabidopsis thaliana GN=At5g47530 PE=2 SV=1
	c37093_g1	0.153813	-2.70075
	c64205_g1	0.153812	-2.70076
	c47761_g1	0.15381	-2.70078	P0C2F6	Putative ribonuclease H protein At1g65750 OS=Arabidopsis thaliana GN=At1g65750 PE=3 SV=1
	c49847_g2	0.153767	-2.70118	Q40478	Ethylene-responsive transcription factor 5 OS=Nicotiana tabacum GN=ERF5 PE=2 SV=1
	c50060_g3	0.153593	-2.70281	Q93WT0	Probable WRKY transcription factor 31 OS=Arabidopsis thaliana GN=WRKY31 PE=2 SV=1
	c60751_g9	0.153514	-2.70356	P22335	Heat shock factor protein HSF24 OS=Solanum peruvianum GN=HSF24 PE=2 SV=1
	c61610_g5	0.153051	-2.70791	Q9SCY5	SNF1-related protein kinase regulatory subunit beta-2 OS=Arabidopsis thaliana GN=KINB2 PE=1 SV=1
	c134902_g1	0.153046	-2.70797
	c60985_g13	0.152965	-2.70872	Q8GWP0	Transcription factor MYB39 OS=Arabidopsis thaliana GN=MYB39 PE=2 SV=1
	c62886_g2	0.15277	-2.71057	Q9ZTX9	Auxin response factor 4 OS=Arabidopsis thaliana GN=ARF4 PE=1 SV=1
	c47184_g1	0.1527	-2.71123	O49286	F-box protein SKP2B OS=Arabidopsis thaliana GN=SKP2B PE=1 SV=1
	c107460_g1	0.152617	-2.71201	P32765	21 kDa seed protein OS=Theobroma cacao GN=ASP PE=2 SV=1
	c54768_g1	0.152546	-2.71268
	c56327_g1	0.152499	-2.71313	Q9FH32	Autophagy-related protein 18f OS=Arabidopsis thaliana GN=ATG18F PE=2 SV=1
	c43264_g1	0.152493	-2.71318	Q0V842	Protein NEN2 OS=Arabidopsis thaliana GN=NEN2 PE=2 SV=1
	c62517_g3	0.152443	-2.71366
	c92439_g1	0.152428	-2.7138
	c92536_g1	0.152185	-2.7161
	c21527_g1	0.152015	-2.71772	A0A0B2QAL0	Phosphorylated carbohydrates phosphatase OS=Glycine soja GN=glysoja_002919 PE=4 SV=1
	c37743_g1	0.151992	-2.71794
	c36916_g1	0.151929	-2.71853	Q9STJ8	Receptor-like serine/threonine-protein kinase At4g25390 OS=Arabidopsis thaliana GN=At4g25390 PE=2 SV=1
	c79976_g1	0.151919	-2.71863	Q9XIJ5	U-box domain-containing protein 18 OS=Arabidopsis thaliana GN=PUB18 PE=2 SV=1
	c15996_g1	0.151914	-2.71867	Q8VZK9	Cellulose synthase-like protein E1 OS=Arabidopsis thaliana GN=CSLE1 PE=2 SV=1
	c57198_g1	0.151842	-2.71936	O65755	Putative deoxycytidylate deaminase (Putative cytidine deaminase) (Fragment) OS=Cicer arietinum PE=2 SV=1
	c63106_g3	0.151454	-2.72304	Q3EBR6	Phospholipase A1-Igamma2, chloroplastic OS=Arabidopsis thaliana GN=At2g30550 PE=1 SV=2
	c130868_g1	0.151048	-2.72692	Q8W3M6	Ubiquitin-like domain-containing CTD phosphatase OS=Arabidopsis thaliana GN=At4g06599 PE=2 SV=1
	c21898_g2	0.151048	-2.72692
	c16437_g1	0.151048	-2.72692
	c16285_g1	0.150815	-2.72915
	c60468_g2	0.150774	-2.72954	P10978	Retrovirus-related Pol polyprotein from transposon TNT 1-94 OS=Nicotiana tabacum PE=2 SV=1
	c134474_g1	0.150708	-2.73017	Q9STX0	Probable WRKY transcription factor 7 OS=Arabidopsis thaliana GN=WRKY7 PE=2 SV=1
	c45529_g1	0.150677	-2.73047	Q6NLC8	Uncharacterized protein At1g66480 OS=Arabidopsis thaliana GN=At1g66480 PE=2 SV=1
	c46232_g1	0.150663	-2.7306	Q9SUQ3	Probable inactive receptor kinase At4g23740 OS=Arabidopsis thaliana GN=At4g23740 PE=2 SV=1
	c59165_g3	0.150476	-2.7324	Q9SX20	Protein NRT1/ PTR FAMILY 3.1 OS=Arabidopsis thaliana GN=NPF3.1 PE=2 SV=1
	c29708_g1	0.150029	-2.73669
	c71680_g1	0.149769	-2.73919	Q96471	S-adenosylmethionine decarboxylase proenzyme OS=Ipomoea nil GN=SAMDC PE=3 SV=1
	c49941_g1	0.149631	-2.74052	O48723	Patatin-like protein 2 OS=Arabidopsis thaliana GN=PLP2 PE=1 SV=1
	c41760_g3	0.149583	-2.74098
	c51162_g2	0.149549	-2.74131
	c62796_g5	0.149513	-2.74166	Q8S8P5	Probable WRKY transcription factor 33 OS=Arabidopsis thaliana GN=WRKY33 PE=1 SV=2
	c60580_g14	0.149424	-2.74251
	c62398_g1	0.149373	-2.74301
	c49032_g1	0.149347	-2.74326
	c107202_g1	0.149194	-2.74474	O04136	Homeobox protein knotted-1-like 3 OS=Malus domestica PE=2 SV=1
	c58655_g1	0.149162	-2.74505	Q9ZWB4	Coumaroyl-CoA:anthocyanidin 3-O-glucoside-6''-O-coumaroyltransferase 1 OS=Arabidopsis thaliana GN=3AT1 PE=1 SV=1
	c54953_g2	0.149107	-2.74558	Q9XIH7	Putative polyol transporter 1 OS=Arabidopsis thaliana GN=PLT1 PE=3 SV=1
	c78609_g1	0.149022	-2.74641
	c57255_g1	0.149006	-2.74655	Q9SJ52	Protein YLS9 OS=Arabidopsis thaliana GN=YLS9 PE=2 SV=1
	c61955_g2	0.14875	-2.74904
	c59307_g1	0.148728	-2.74925	A0A151QR33	IST1-like protein OS=Cajanus cajan GN=KK1_046528 PE=4 SV=1
	c60400_g9	0.148481	-2.75165
	c60751_g2	0.148423	-2.75222
	c47398_g1	0.148423	-2.75222
	c8935_g1	0.148423	-2.75222	Q9SAA2	ATP-dependent Clp protease proteolytic subunit 6, chloroplastic OS=Arabidopsis thaliana GN=CLPP6 PE=1 SV=1
	c56838_g1	0.148382	-2.75261	Q8L7R5	CASP-like protein 5B3 OS=Arabidopsis thaliana GN=At3g23200 PE=2 SV=1
	c99221_g1	0.148335	-2.75307
	c135593_g1	0.148335	-2.75307	O80450	Trihelix transcription factor GT-3b OS=Arabidopsis thaliana GN=GT-3B PE=1 SV=1
	c33377_g1	0.148085	-2.75551	Q6LA43	Two-component response regulator-like APRR2 OS=Arabidopsis thaliana GN=APRR2 PE=2 SV=2
	c91161_g1	0.147916	-2.75715	Q9FKJ0	F-box/kelch-repeat protein At5g60570 OS=Arabidopsis thaliana GN=At5g60570 PE=2 SV=1
	c16821_g1	0.147825	-2.75804
	c78451_g1	0.147753	-2.75874
	c92549_g1	0.147686	-2.75939	Q93ZA0	Probable chlorophyll(ide) b reductase NYC1, chloroplastic OS=Arabidopsis thaliana GN=NYC1 PE=1 SV=1
	c92327_g1	0.14765	-2.75974	Q9FY48	E3 ubiquitin-protein ligase KEG OS=Arabidopsis thaliana GN=KEG PE=1 SV=2
	c59537_g4	0.147557	-2.76066	O23264	Selenium-binding protein 1 OS=Arabidopsis thaliana GN=SBP1 PE=1 SV=1
	c96806_g1	0.147334	-2.76284
	c52431_g1	0.147334	-2.76284
	c63647_g2	0.147267	-2.7635	P10978	Retrovirus-related Pol polyprotein from transposon TNT 1-94 OS=Nicotiana tabacum PE=2 SV=1
	c51473_g2	0.147251	-2.76365	Q8VYZ2	Purple acid phosphatase 8 OS=Arabidopsis thaliana GN=PAP8 PE=2 SV=1
	c64993_g1	0.1472	-2.76415
	c36227_g1	0.146882	-2.76727	Q2EF88	Metal-nicotianamine transporter YSL3 OS=Arabidopsis thaliana GN=YSL3 PE=2 SV=1
	c59117_g1	0.146758	-2.76849
	c57177_g3	0.14673	-2.76876	A0A0B2Q2A6	CRAL-TRIO domain-containing protein OS=Glycine soja GN=glysoja_036328 PE=4 SV=1
	c22756_g1	0.146631	-2.76974	P25804	Cysteine proteinase 15A OS=Pisum sativum PE=2 SV=1
	c61854_g10	0.146517	-2.77086
	c106287_g1	0.146397	-2.77204	Q9LW57	Probable plastid-lipid-associated protein 6, chloroplastic OS=Arabidopsis thaliana GN=PAP6 PE=1 SV=1
	c54851_g1	0.146383	-2.77218	A0A0S3SSA0	Uncharacterized protein OS=Vigna angularis var. angularis GN=Vigan.08G248600 PE=4 SV=1
	c60981_g11	0.14632	-2.7728
	c62398_g2	0.146305	-2.77295
	c54666_g5	0.146299	-2.77301
	c30829_g1	0.146299	-2.77301
	c48054_g1	0.146299	-2.77301
	c25862_g1	0.146299	-2.77301
	c45824_g1	0.145893	-2.77701	Q9XGI7	Nicotianamine synthase OS=Solanum lycopersicum GN=CHLN PE=2 SV=1
	c24967_g1	0.145877	-2.77718
	c53737_g2	0.14583	-2.77764	Q39237	Transcription factor TGA1 OS=Arabidopsis thaliana GN=TGA1 PE=1 SV=2
	c65456_g1	0.145727	-2.77866
	c50996_g2	0.145619	-2.77973	F4IDI6	Probable BOI-related E3 ubiquitin-protein ligase 2 OS=Arabidopsis thaliana GN=BRG2 PE=1 SV=1
	c60201_g3	0.145494	-2.78096	Q9FH32	Autophagy-related protein 18f OS=Arabidopsis thaliana GN=ATG18F PE=2 SV=1
	c106776_g1	0.145463	-2.78127	A7NY33	Peroxidase 4 OS=Vitis vinifera GN=GSVIVT00023967001 PE=1 SV=1
	c42955_g1	0.145179	-2.78409	A7VLV1	Protein STAY-GREEN, chloroplastic OS=Pisum sativum GN=SGR PE=2 SV=1
	c62105_g2	0.144948	-2.78639	Q96262	Plasma membrane-associated cation-binding protein 1 OS=Arabidopsis thaliana GN=PCAP1 PE=1 SV=1
	c60744_g1	0.144919	-2.78668	O49500	E3 ubiquitin-protein ligase MBR2 OS=Arabidopsis thaliana GN=MBR2 PE=1 SV=1
	c59537_g2	0.144792	-2.78794	O23264	Selenium-binding protein 1 OS=Arabidopsis thaliana GN=SBP1 PE=1 SV=1
	c42379_g1	0.144754	-2.78833	P37273	Phytoene synthase 2, chloroplastic (Fragment) OS=Solanum lycopersicum GN=PSY2 PE=2 SV=1
	c39093_g1	0.144621	-2.78965
	c68376_g1	0.144564	-2.79022
	c107831_g1	0.144557	-2.79029
	c69312_g1	0.144507	-2.79079
	c119710_g1	0.144317	-2.79269
	c32353_g1	0.144277	-2.79309
	c121839_g1	0.144237	-2.79349
	c65329_g1	0.144166	-2.7942
	c55978_g2	0.143693	-2.79894	O80434	Laccase-4 OS=Arabidopsis thaliana GN=IRX12 PE=2 SV=2
	c60211_g6	0.14345	-2.80138	Q8RYC8	Auxin response factor 19 OS=Arabidopsis thaliana GN=ARF19 PE=1 SV=2
	c51138_g2	0.143376	-2.80212
	c60989_g5	0.143376	-2.80212
	c93908_g1	0.143332	-2.80257	P29136	Metalloendoproteinase 1 OS=Glycine max PE=1 SV=2
	c38066_g1	0.143252	-2.80338	O80725	ABC transporter B family member 4 OS=Arabidopsis thaliana GN=ABCB4 PE=1 SV=1
	c27148_g2	0.143252	-2.80338
	c54622_g4	0.143245	-2.80344	P10978	Retrovirus-related Pol polyprotein from transposon TNT 1-94 OS=Nicotiana tabacum PE=2 SV=1
	c72427_g1	0.143139	-2.80451	Q8W3Z2	Lupeol synthase OS=Betula platyphylla GN=OSCBPW PE=1 SV=1
	c60087_g6	0.143139	-2.80451	Q9ZUS1	WAT1-related protein At2g37460 OS=Arabidopsis thaliana GN=At2g37460 PE=2 SV=1
	c51898_g1	0.142913	-2.80679	P48631	Omega-6 fatty acid desaturase, endoplasmic reticulum isozyme 2 OS=Glycine max GN=FAD2-2 PE=2 SV=1
	c60362_g2	0.142639	-2.80956	Q9SS90	E3 ubiquitin-protein ligase RGLG1 OS=Arabidopsis thaliana GN=RGLG1 PE=1 SV=1
	c64267_g1	0.142335	-2.81264	Q9LXJ0	Cell division protein FtsZ homolog 2-2, chloroplastic OS=Arabidopsis thaliana GN=FTSZ2-2 PE=1 SV=1
	c121413_g1	0.142254	-2.81346	O64636	Cytochrome P450 76C1 OS=Arabidopsis thaliana GN=CYP76C1 PE=2 SV=1
	c120615_g1	0.142174	-2.81427	Q9SJ52	Protein YLS9 OS=Arabidopsis thaliana GN=YLS9 PE=2 SV=1
	c10126_g1	0.142151	-2.81451
	c55051_g4	0.142142	-2.81459
	c60432_g3	0.142129	-2.81473
	c53144_g1	0.142064	-2.81539	Q9S7W5	Transcription factor TCP13 OS=Arabidopsis thaliana GN=TCP13 PE=1 SV=1
	c78580_g1	0.141918	-2.81687	O65782	Cytochrome P450 83B1 OS=Arabidopsis thaliana GN=CYP83B1 PE=1 SV=1
	c49069_g1	0.141723	-2.81885
	c97934_g1	0.14166	-2.81949	Q0WP36	Molybdate transporter 2 OS=Arabidopsis thaliana GN=MOT2 PE=1 SV=2
	c53895_g1	0.141566	-2.82045
	c128025_g1	0.141529	-2.82083	Q96289	Zinc finger protein ZAT10 OS=Arabidopsis thaliana GN=ZAT10 PE=2 SV=1
	c24119_g1	0.141404	-2.82211
	c52219_g1	0.141347	-2.82269	Q9ZQ96	UDP-glycosyltransferase 73C3 OS=Arabidopsis thaliana GN=UGT73C3 PE=2 SV=1
	c56987_g3	0.141294	-2.82322	Q8GV43	Phosphoinositide phospholipase C 6 OS=Arabidopsis thaliana GN=PLC6 PE=2 SV=2
	c53135_g1	0.141253	-2.82364	P04078	Glutamine synthetase cytosolic isozyme OS=Medicago sativa PE=2 SV=1
	c79649_g1	0.141253	-2.82364	Q8L850	Phosphatidylinositol 4-phosphate 5-kinase 9 OS=Arabidopsis thaliana GN=PIP5K9 PE=1 SV=2
	c57393_g4	0.141037	-2.82585	Q7XBH4	Myb-related protein Myb4 OS=Oryza sativa subsp. japonica GN=MYB4 PE=2 SV=2
	c121364_g1	0.140834	-2.82793	Q84M24	ABC transporter A family member 1 OS=Arabidopsis thaliana GN=ABCA1 PE=2 SV=2
	c116057_g1	0.140834	-2.82793	Q8LBH4	SPX domain-containing protein 1 OS=Arabidopsis thaliana GN=SPX1 PE=2 SV=2
	c57929_g3	0.14053	-2.83105
	c58494_g1	0.14053	-2.83105
	c4676_g1	0.13997	-2.83681	A2YNT8	Serine/threonine-protein kinase SAPK2 OS=Oryza sativa subsp. indica GN=SAPK2 PE=2 SV=2
	c63198_g1	0.139625	-2.84037	G7JMT7	Component of IIS longevity pathway SMK-1 domain protein OS=Medicago truncatula GN=MTR_4g121890 PE=4 SV=1
	c106515_g1	0.139545	-2.84119	P49045	Vacuolar-processing enzyme OS=Glycine max PE=2 SV=1
	c59848_g4	0.139176	-2.84501
	c15559_g1	0.138897	-2.84791
	c59928_g2	0.138867	-2.84823	Q9ZNU2	NAC domain-containing protein 18 OS=Arabidopsis thaliana GN=NAC018 PE=2 SV=1
	c93139_g1	0.138856	-2.84834	P48001	Homeobox protein knotted-1-like 4 OS=Arabidopsis thaliana GN=KNAT4 PE=1 SV=3
	c55075_g2	0.138776	-2.84918	Q9LJW5	Mini zinc finger protein 2 OS=Arabidopsis thaliana GN=MIF2 PE=1 SV=1
	c78304_g1	0.138702	-2.84993	Q9ZNU2	NAC domain-containing protein 18 OS=Arabidopsis thaliana GN=NAC018 PE=2 SV=1
	c61723_g4	0.138526	-2.85177	Q9CAV6	Serine/threonine-protein kinase WNK1 OS=Arabidopsis thaliana GN=WNK1 PE=1 SV=1
	c46062_g1	0.138281	-2.85433	Q94AC1	Rhodanese-like domain-containing protein 6 OS=Arabidopsis thaliana GN=STR6 PE=2 SV=1
	c54412_g1	0.13814	-2.85579	Q6NQ99	Protein POLAR LOCALIZATION DURING ASYMMETRIC DIVISION AND REDISTRIBUTION OS=Arabidopsis thaliana GN=POLAR PE=2 SV=1
	c58203_g1	0.138055	-2.85668
	c63843_g2	0.138042	-2.85682	P10978	Retrovirus-related Pol polyprotein from transposon TNT 1-94 OS=Nicotiana tabacum PE=2 SV=1
	c78498_g1	0.137958	-2.8577
	c129807_g1	0.137709	-2.86031	Q764T8	Lupeol synthase OS=Glycyrrhiza glabra GN=LUS1 PE=1 SV=1
	c55352_g1	0.137709	-2.86031	O04609	WRKY transcription factor 22 OS=Arabidopsis thaliana GN=WRKY22 PE=2 SV=1
	c42874_g1	0.137574	-2.86173	B9RW00	CASP-like protein 1C1 OS=Ricinus communis GN=RCOM_1174750 PE=2 SV=1
	c70880_g1	0.137574	-2.86173
	c45038_g1	0.13745	-2.86303	Q9M2C3	Vacuolar iron transporter homolog 3 OS=Arabidopsis thaliana GN=At3g43630 PE=3 SV=1
	c31053_g1	0.137191	-2.86574
	c115637_g1	0.136992	-2.86784
	c59673_g3	0.136989	-2.86786
	c9646_g1	0.136757	-2.87032
	c62846_g3	0.136688	-2.87104
	c47034_g2	0.136671	-2.87122	P27054	Endochitinase PR4 OS=Phaseolus vulgaris GN=CHI4 PE=2 SV=1
	c36044_g1	0.136661	-2.87132	F4JMI5	Putative glucuronosyltransferase PGSIP7 OS=Arabidopsis thaliana GN=PGSIP7 PE=3 SV=1
	c96636_g1	0.136661	-2.87132	Q9FYC2	Pheophorbide a oxygenase, chloroplastic OS=Arabidopsis thaliana GN=PAO PE=1 SV=1
	c97481_g1	0.136649	-2.87145	Q9FHQ3	15.7 kDa heat shock protein, peroxisomal OS=Arabidopsis thaliana GN=HSP15.7 PE=2 SV=1
	c78385_g1	0.136538	-2.87263	A0A068UI78	Uncharacterized protein OS=Coffea canephora GN=GSCOC_T00026913001 PE=4 SV=1
	c39196_g2	0.135974	-2.87859
	c17344_g1	0.135933	-2.87903
	c140762_g1	0.135762	-2.88084
	c38211_g2	0.135762	-2.88084
	c52227_g1	0.135661	-2.88192
	c53031_g4	0.135306	-2.8857	Q6NMR9	GDSL esterase/lipase At5g45920 OS=Arabidopsis thaliana GN=At5g45920 PE=2 SV=1
	c53662_g2	0.135246	-2.88634
	c112357_g1	0.135246	-2.88634	Q8W413	Beta-fructofuranosidase, insoluble isoenzyme CWINV4 OS=Arabidopsis thaliana GN=CWINV4 PE=2 SV=1
	c61446_g4	0.135246	-2.88634
	c15607_g1	0.134914	-2.88988	Q0WP36	Molybdate transporter 2 OS=Arabidopsis thaliana GN=MOT2 PE=1 SV=2
	c94105_g1	0.134739	-2.89176	P42762	Chaperone protein ClpD, chloroplastic OS=Arabidopsis thaliana GN=CLPD PE=1 SV=1
	c122141_g1	0.134675	-2.89244	Q9ZUA5	Vacuolar iron transporter 1 OS=Arabidopsis thaliana GN=VIT1 PE=2 SV=1
	c29189_g1	0.134623	-2.893	Q8L7Y9	Non-specific phospholipase C1 OS=Arabidopsis thaliana GN=NPC1 PE=2 SV=1
	c59427_g5	0.134597	-2.89328	P57758	Cystinosin homolog OS=Arabidopsis thaliana GN=At5g40670 PE=2 SV=1
	c60256_g6	0.134575	-2.89351	Q5XF57	Probable receptor-like serine/threonine-protein kinase At5g57670 OS=Arabidopsis thaliana GN=At5g57670 PE=2 SV=1
	c57129_g1	0.134555	-2.89373
	c79861_g1	0.134407	-2.89532	Q93VH2	Bifunctional nuclease 2 OS=Arabidopsis thaliana GN=BBD2 PE=2 SV=1
	c51071_g2	0.134407	-2.89532	Q9SLG8	Protein STRICTOSIDINE SYNTHASE-LIKE 2 OS=Arabidopsis thaliana GN=SSL2 PE=2 SV=1
	c61020_g2	0.134075	-2.89889	Q39817	Calnexin homolog OS=Glycine max PE=2 SV=1
	c43504_g1	0.134063	-2.89902
	c16058_g1	0.134003	-2.89967	Q84WW1	F-box protein At3g12350 OS=Arabidopsis thaliana GN=At3g12350 PE=2 SV=1
	c25141_g1	0.13399	-2.89981
	c143506_g1	0.133521	-2.90486	Q67YC0	Inorganic pyrophosphatase 1 OS=Arabidopsis thaliana GN=PS2 PE=1 SV=1
	c53330_g1	0.133484	-2.90526	Q93ZB9	Fatty acyl-CoA reductase 3 OS=Arabidopsis thaliana GN=FAR3 PE=2 SV=1
	c36889_g1	0.133371	-2.90648
	c141656_g1	0.133371	-2.90648	Q6DR10	Protein trichome birefringence-like 43 OS=Arabidopsis thaliana GN=TBL43 PE=2 SV=1
	c84451_g1	0.133371	-2.90648
	c57929_g2	0.133361	-2.90659
	c16427_g1	0.13334	-2.90682
	c31169_g1	0.133316	-2.90708	Q9ZNU2	NAC domain-containing protein 18 OS=Arabidopsis thaliana GN=NAC018 PE=2 SV=1
	c49221_g1	0.133231	-2.908
	c47614_g1	0.132981	-2.91071
	c55717_g1	0.132811	-2.91256	Q9SBQ9	Flavonoid 3'-monooxygenase OS=Petunia hybrida GN=CYP75B2 PE=2 SV=1
	c110280_g1	0.132761	-2.91309
	c47206_g1	0.132684	-2.91393	A2XQV4	Electron transfer flavoprotein subunit beta, mitochondrial OS=Oryza sativa subsp. indica GN=ETFB PE=3 SV=1
	c95577_g1	0.132613	-2.9147	G7IU15	DUF1230 family protein OS=Medicago truncatula GN=MTR_5g016100 PE=2 SV=1
	c56236_g1	0.132599	-2.91486	Q9LVJ3	Probable GTP diphosphokinase RSH2, chloroplastic OS=Arabidopsis thaliana GN=RSH2 PE=2 SV=1
	c26652_g2	0.132134	-2.91993	I1JUW8	Uncharacterized protein OS=Glycine max GN=GLYMA_04G085500 PE=4 SV=1
	c60563_g2	0.132062	-2.92071
	c21766_g1	0.132058	-2.92076
	c39446_g1	0.13202	-2.92118	P93732	Proline iminopeptidase OS=Arabidopsis thaliana GN=PIP PE=2 SV=3
	c57770_g2	0.13202	-2.92118	B9DFI7	Probable methyltransferase PMT2 OS=Arabidopsis thaliana GN=At1g26850 PE=2 SV=2
	c64360_g1	0.13202	-2.92118	C0LGK9	Probable LRR receptor-like serine/threonine-protein kinase At2g24230 OS=Arabidopsis thaliana GN=At2g24230 PE=2 SV=1
	c33224_g1	0.131828	-2.92327
	c67153_g1	0.131195	-2.93021	Q9SGP6	Glutaredoxin-C9 OS=Arabidopsis thaliana GN=GRXC9 PE=1 SV=1
	c33129_g2	0.131097	-2.93129	O65554	CBL-interacting serine/threonine-protein kinase 6 OS=Arabidopsis thaliana GN=CIPK6 PE=1 SV=1
	c35269_g1	0.131077	-2.93151	Q9SEY5	Probable acyl-activating enzyme 2 OS=Arabidopsis thaliana GN=AAE2 PE=2 SV=1
	c60404_g9	0.131044	-2.93188	C0LGN2	Probable leucine-rich repeat receptor-like serine/threonine-protein kinase At3g14840 OS=Arabidopsis thaliana GN=LRR-RLK PE=2 SV=1
	c67302_g1	0.131044	-2.93188
	c47062_g1	0.131044	-2.93188	Q9FKB0	Sm-like protein LSM5 OS=Arabidopsis thaliana GN=LSM5 PE=1 SV=1
	c43271_g1	0.130773	-2.93486
	c58368_g1	0.13077	-2.93489	Q6NLQ3	Glycolipid transfer protein 2 OS=Arabidopsis thaliana GN=GLTP2 PE=2 SV=1
	c107857_g1	0.130741	-2.93522	O82730	Monogalactosyldiacylglycerol synthase 2, chloroplastic OS=Arabidopsis thaliana GN=MGD2 PE=1 SV=1
	c127843_g1	0.130712	-2.93554
	c54045_g1	0.1307	-2.93567	P24805	Stem-specific protein TSJT1 OS=Nicotiana tabacum GN=TSJT1 PE=2 SV=1
	c53351_g2	0.130428	-2.93868	Q9FLJ2	NAC domain-containing protein 100 OS=Arabidopsis thaliana GN=NAC100 PE=2 SV=1
	c3675_g1	0.130359	-2.93944	O64518	Metacaspase-5 OS=Arabidopsis thaliana GN=AMC5 PE=1 SV=1
	c9750_g1	0.130236	-2.9408
	c38892_g1	0.130236	-2.9408
	c95990_g1	0.130226	-2.94091
	c25651_g1	0.13	-2.94342	A0A0B2PU23	Lipase OS=Glycine soja GN=glysoja_008754 PE=4 SV=1
	c57752_g4	0.129658	-2.94721	P24805	Stem-specific protein TSJT1 OS=Nicotiana tabacum GN=TSJT1 PE=2 SV=1
	c52242_g3	0.129407	-2.95001	Q94AG2	Somatic embryogenesis receptor kinase 1 OS=Arabidopsis thaliana GN=SERK1 PE=1 SV=2
	c59132_g1	0.129205	-2.95227	Q6RVV4	Short-chain dehydrogenase TIC 32, chloroplastic OS=Pisum sativum GN=TIC32 PE=1 SV=1
	c20531_g2	0.12901	-2.95445	O64518	Metacaspase-5 OS=Arabidopsis thaliana GN=AMC5 PE=1 SV=1
	c41760_g1	0.128993	-2.95464	A0A0L9TAE1	Uncharacterized protein OS=Phaseolus angularis GN=LR48_Vigan393s002800 PE=4 SV=1
	c59654_g1	0.128897	-2.95571	Q9LS40	Protein ASPARTIC PROTEASE IN GUARD CELL 1 OS=Arabidopsis thaliana GN=ASPG1 PE=1 SV=1
	c44440_g2	0.128881	-2.95589	Q9C6I6	Electron transfer flavoprotein subunit alpha, mitochondrial OS=Arabidopsis thaliana GN=ETFA PE=1 SV=1
	c45656_g1	0.128805	-2.95674	Q9SLC4	RING-H2 finger protein ATL40 OS=Arabidopsis thaliana GN=ATL40 PE=2 SV=1
	c4922_g1	0.128805	-2.95674
	c49829_g2	0.128793	-2.95687
	c56327_g2	0.128543	-2.95968
	c55585_g1	0.128386	-2.96144	Q9SQZ0	Cationic amino acid transporter 7, chloroplastic OS=Arabidopsis thaliana GN=CAT7 PE=3 SV=1
	c96042_g1	0.128348	-2.96187
	c59368_g2	0.12817	-2.96387
	c57929_g1	0.128106	-2.96459	B6TZ45	Cell number regulator 1 OS=Zea mays GN=CNR1 PE=2 SV=1
	c101910_g1	0.128063	-2.96507
	c79461_g1	0.127932	-2.96656
	c69895_g1	0.127827	-2.96773
	c51420_g1	0.12775	-2.9686
	c22419_g1	0.12775	-2.9686
	c8873_g1	0.12775	-2.9686	Q9FMC2	Basic leucine zipper 43 OS=Arabidopsis thaliana GN=BZIP43 PE=1 SV=1
	c59248_g2	0.127584	-2.97049	Q9SGP2	Receptor-like protein kinase HSL1 OS=Arabidopsis thaliana GN=HSL1 PE=2 SV=1
	c33436_g1	0.127245	-2.97432	B9EYD3	Phospholipase A1-II 4 OS=Oryza sativa subsp. japonica GN=Os01g0652300 PE=2 SV=2
	c78377_g1	0.127245	-2.97432
	c13053_g1	0.127153	-2.97537
	c135853_g1	0.127132	-2.9756	Q9SGA8	UDP-glycosyltransferase 83A1 OS=Arabidopsis thaliana GN=UGT83A1 PE=2 SV=1
	c34653_g1	0.127075	-2.97625	K7KHU9	Uncharacterized protein OS=Glycine max GN=GLYMA_04G031800 PE=4 SV=1
	c51204_g1	0.127062	-2.9764	P22335	Heat shock factor protein HSF24 OS=Solanum peruvianum GN=HSF24 PE=2 SV=1
	c78834_g1	0.126897	-2.97828	P33629	Tubulin alpha chain OS=Prunus dulcis GN=TUBA PE=2 SV=1
	c134387_g1	0.126781	-2.97958	F8WKW0	Crocetin glucosyltransferase, chloroplastic OS=Gardenia jasminoides GN=UGT75L6 PE=1 SV=1
	c52891_g1	0.126755	-2.97988	O81032	Probable L-gulonolactone oxidase 6 OS=Arabidopsis thaliana GN=GULLO6 PE=3 SV=1
	c57583_g1	0.126749	-2.97995
	c50501_g3	0.126725	-2.98022	Q9SGU9	Methionine gamma-lyase OS=Arabidopsis thaliana GN=MGL PE=1 SV=1
	c55935_g1	0.126725	-2.98022
	c51718_g1	0.12667	-2.98086	Q9LMR5	F-box/kelch-repeat protein At1g15670 OS=Arabidopsis thaliana GN=At1g15670 PE=2 SV=1
	c128837_g1	0.126642	-2.98118
	c46712_g1	0.12652	-2.98256
	c61517_g2	0.126448	-2.98339	Q9FL41	WAT1-related protein At5g07050 OS=Arabidopsis thaliana GN=At5g07050 PE=2 SV=1
	c50387_g3	0.126447	-2.98339
	c57918_g1	0.126378	-2.98418	Q9SDQ3	Scarecrow-like protein 1 OS=Arabidopsis thaliana GN=SCL1 PE=2 SV=1
	c54875_g1	0.126235	-2.98581	Q9SXB8	G-type lectin S-receptor-like serine/threonine-protein kinase At1g11330 OS=Arabidopsis thaliana GN=At1g11330 PE=2 SV=3
	c15897_g1	0.126234	-2.98582	Q8L586	Uncharacterized membrane protein At4g09580 OS=Arabidopsis thaliana GN=At4g09580 PE=1 SV=1
	c60201_g5	0.125902	-2.98963
	c120356_g1	0.125881	-2.98987	Q8S3D1	Transcription factor bHLH68 OS=Arabidopsis thaliana GN=BHLH68 PE=2 SV=2
	c96238_g1	0.125846	-2.99027
	c38786_g1	0.125791	-2.9909
	c96784_g1	0.125743	-2.99145
	c51310_g1	0.125691	-2.99205	Q8GY42	NAC transcription factor 25 OS=Arabidopsis thaliana GN=NAC025 PE=2 SV=1
	c56987_g1	0.125663	-2.99237	Q944C1	Phosphoinositide phospholipase C 4 OS=Arabidopsis thaliana GN=PLC4 PE=2 SV=2
	c46789_g1	0.125282	-2.99675	Q8S3D1	Transcription factor bHLH68 OS=Arabidopsis thaliana GN=BHLH68 PE=2 SV=2
	c134654_g1	0.125238	-2.99726
	c53756_g1	0.125225	-2.99741	A0SPJ4	NAC transcription factor NAM-B1 OS=Triticum dicoccoides GN=NAM-B1 PE=3 SV=1
	c134316_g1	0.125199	-2.9977	Q42798	3,9-dihydroxypterocarpan 6A-monooxygenase OS=Glycine max GN=CYP93A1 PE=1 SV=1
	c62535_g1	0.124952	-3.00056	Q9SYH1	Probable GTP diphosphokinase RSH3, chloroplastic OS=Arabidopsis thaliana GN=RSH3 PE=2 SV=1
	c33456_g1	0.124933	-3.00078	P05522	Endoglucanase 1 OS=Persea americana GN=CEL1 PE=2 SV=1
	c33940_g1	0.124861	-3.0016	Q6XBF8	Aspartic proteinase CDR1 OS=Arabidopsis thaliana GN=CDR1 PE=1 SV=1
	c57953_g1	0.124729	-3.00313	P24397	Hyoscyamine 6-dioxygenase OS=Hyoscyamus niger GN=H6H PE=1 SV=1
	c56135_g4	0.124617	-3.00443	Q38910	Probable xyloglucan endotransglucosylase/hydrolase protein 23 OS=Arabidopsis thaliana GN=XTH23 PE=2 SV=1
	c61131_g1	0.124439	-3.00649	Q8CWR6	Alpha-monoglucosyldiacylglycerol synthase OS=Streptococcus pneumoniae (strain ATCC BAA-255 / R6) GN=spr0982 PE=3 SV=1
	c86684_g1	0.124388	-3.00708	Q9SGU9	Methionine gamma-lyase OS=Arabidopsis thaliana GN=MGL PE=1 SV=1
	c21088_g1	0.124388	-3.00708	Q8LBA0	NEP1-interacting protein-like 2 OS=Arabidopsis thaliana GN=ATL24 PE=1 SV=2
	c60493_g1	0.124337	-3.00768	Q9S9T7	Vacuolar protein sorting-associated protein 28 homolog 2 OS=Arabidopsis thaliana GN=VPS28-2 PE=1 SV=2
	c51019_g1	0.12432	-3.00787	Q8L518	Probable choline kinase 2 OS=Arabidopsis thaliana GN=At1g74320 PE=2 SV=1
	c118801_g1	0.124254	-3.00863
	c22384_g1	0.124254	-3.00863	O04084	Serine carboxypeptidase-like 31 OS=Arabidopsis thaliana GN=SCPL31 PE=2 SV=2
	c63228_g5	0.124254	-3.00863
	c41428_g1	0.123859	-3.01324
	c92591_g1	0.123705	-3.01503
	c59291_g2	0.123639	-3.0158	Q9SKT1	Ethylene-responsive transcription factor ERF053 OS=Arabidopsis thaliana GN=ERF053 PE=2 SV=1
	c61240_g3	0.123637	-3.01582	Q9ZQG9	Glucan endo-1,3-beta-glucosidase 14 OS=Arabidopsis thaliana GN=At2g27500 PE=1 SV=2
	c43688_g1	0.12361	-3.01613	Q2V6K0	UDP-glucose flavonoid 3-O-glucosyltransferase 6 OS=Fragaria ananassa GN=GT6 PE=1 SV=1
	c59928_g3	0.1236	-3.01625	A0SPJ6	NAC transcription factor NAM-B2 OS=Triticum turgidum subsp. durum GN=NAM-B2 PE=2 SV=1
	c58740_g1	0.123263	-3.02019
	c47369_g2	0.122526	-3.02884
	c58912_g1	0.122404	-3.03028	Q6R3L0	Metal-nicotianamine transporter YSL1 OS=Arabidopsis thaliana GN=YSL1 PE=2 SV=2
	c47263_g1	0.122296	-3.03155
	c35092_g1	0.122296	-3.03155
	c58494_g2	0.122252	-3.03207
	c54851_g2	0.122201	-3.03267	Q8LGG8	Universal stress protein A-like protein OS=Arabidopsis thaliana GN=At3g01520 PE=1 SV=2
	c56504_g3	0.121657	-3.03911
	c38223_g2	0.121475	-3.04127
	c98565_g1	0.121401	-3.04215	Q9ZQE6	Calmodulin-like protein 1 OS=Arabidopsis thaliana GN=CML1 PE=2 SV=1
	c107270_g1	0.12107	-3.04609
	c16661_g1	0.120944	-3.04759
	c31207_g1	0.120944	-3.04759
	c96471_g1	0.120944	-3.04759
	c57806_g5	0.120897	-3.04815	Q9SIN2	Protein trichome birefringence-like 39 OS=Arabidopsis thaliana GN=TBL39 PE=2 SV=1
	c22376_g1	0.120626	-3.05139
	c85189_g1	0.120567	-3.0521
	c62635_g1	0.120567	-3.0521	O49858	Cytochrome P450 82A3 OS=Glycine max GN=CYP82A3 PE=2 SV=1
	c59134_g3	0.120567	-3.0521	Q9SYI2	ABC transporter B family member 3 OS=Arabidopsis thaliana GN=ABCB3 PE=3 SV=1
	c54846_g1	0.120559	-3.05219
	c59253_g2	0.120462	-3.05335	D7SFH9	Glycerophosphodiester phosphodiesterase protein kinase domain-containing GDPDL2 OS=Arabidopsis thaliana GN=GDPDL2 PE=1 SV=1
	c20859_g1	0.120315	-3.05511	Q9ASS6	Photosynthetic NDH subunit of lumenal location 5, chloroplastic OS=Arabidopsis thaliana GN=PNSL5 PE=1 SV=1
	c48889_g1	0.120189	-3.05662
	c135222_g1	0.119917	-3.0599
	c52978_g1	0.119846	-3.06075
	c145442_g1	0.119846	-3.06075	F4IH31	Staphylococcal-like nuclease CAN2 OS=Arabidopsis thaliana GN=CAN2 PE=1 SV=1
	c56923_g1	0.119846	-3.06075
	c47366_g1	0.119846	-3.06075	Q3E8X3	Protein NRT1/ PTR FAMILY 2.8 OS=Arabidopsis thaliana GN=NPF2.8 PE=2 SV=2
	c15688_g1	0.119846	-3.06075	P28583	Calcium-dependent protein kinase SK5 OS=Glycine max PE=1 SV=1
	c10205_g1	0.119846	-3.06075
	c61550_g1	0.119711	-3.06238	A0A072TTI4	Cellulase/Endoglucanase (Glycosyl hydrolase family 5) OS=Medicago truncatula GN=MTR_8g089665 PE=3 SV=1
	c136897_g1	0.119483	-3.06512
	c57724_g2	0.11939	-3.06625	P29602	Cucumber peeling cupredoxin OS=Cucumis sativus PE=1 SV=3
	c55722_g1	0.119202	-3.06852	Q9FLJ2	NAC domain-containing protein 100 OS=Arabidopsis thaliana GN=NAC100 PE=2 SV=1
	c123847_g1	0.119045	-3.07042
	c26471_g1	0.119043	-3.07045
	c99095_g1	0.119043	-3.07045	Q9LVE0	Protein NRT1/ PTR FAMILY 6.4 OS=Arabidopsis thaliana GN=NPF6.4 PE=1 SV=1
	c121588_g1	0.119022	-3.0707
	c63156_g3	0.118987	-3.07112	Q9SCW1	Beta-galactosidase 1 OS=Arabidopsis thaliana GN=BGAL1 PE=1 SV=1
	c58413_g4	0.118778	-3.07366	Q38910	Probable xyloglucan endotransglucosylase/hydrolase protein 23 OS=Arabidopsis thaliana GN=XTH23 PE=2 SV=1
	c92849_g1	0.118603	-3.07579
	c52923_g1	0.118454	-3.07761	Q6AVI0	Zinc finger BED domain-containing protein RICESLEEPER 2 OS=Oryza sativa subsp. japonica GN=Os03g0733400 PE=2 SV=1
	c57404_g1	0.118001	-3.08313	Q9M2Y9	Transcription factor RAX3 OS=Arabidopsis thaliana GN=RAX3 PE=2 SV=1
	c49851_g1	0.117806	-3.08551
	c37940_g1	0.117806	-3.08551
	c101647_g1	0.117732	-3.08643	Q9ASS4	Probably inactive leucine-rich repeat receptor-like protein kinase At5g48380 OS=Arabidopsis thaliana GN=At5g48380 PE=1 SV=1
	c24924_g1	0.116927	-3.09632	Q9C523	Dirigent protein 19 OS=Arabidopsis thaliana GN=DIR19 PE=2 SV=1
	c61908_g4	0.116802	-3.09786	Q2RAC5	Cyclin-T1-3 OS=Oryza sativa subsp. japonica GN=CYCT1-3 PE=3 SV=2
	c93711_g1	0.116539	-3.10112
	c67908_g1	0.116539	-3.10112	P51850	Pyruvate decarboxylase 1 OS=Pisum sativum GN=PDC1 PE=2 SV=1
	c51808_g3	0.116372	-3.10319	P17407	21 kDa protein OS=Daucus carota PE=2 SV=1
	c60801_g1	0.116273	-3.10441	Q84MB3	1-aminocyclopropane-1-carboxylate oxidase homolog 1 OS=Arabidopsis thaliana GN=At1g06620 PE=2 SV=1
	c55191_g2	0.116241	-3.10481	Q9ZVN4	Probable tyrosine-protein phosphatase At1g05000 OS=Arabidopsis thaliana GN=At1g05000 PE=1 SV=1
	c33744_g1	0.115922	-3.10878
	c13661_g1	0.115922	-3.10878	P92519	Uncharacterized mitochondrial protein AtMg00810 OS=Arabidopsis thaliana GN=AtMg00810 PE=4 SV=1
	c25071_g1	0.115922	-3.10878
	c93184_g1	0.115922	-3.10878
	c42998_g1	0.115922	-3.10878
	c58426_g2	0.115922	-3.10878
	c54953_g3	0.115914	-3.10887	Q8VZ80	Polyol transporter 5 OS=Arabidopsis thaliana GN=PLT5 PE=1 SV=2
	c38896_g1	0.115904	-3.10899
	c56135_g3	0.115197	-3.11783
	c32544_g1	0.115173	-3.11813	Q9LI74	Protein CHUP1, chloroplastic OS=Arabidopsis thaliana GN=CHUP1 PE=1 SV=1
	c19681_g1	0.115048	-3.11969
	c50912_g1	0.115048	-3.11969	O22213	Cytokinin dehydrogenase 1 OS=Arabidopsis thaliana GN=CKX1 PE=1 SV=1
	c57790_g5	0.115012	-3.12015	Q94BZ1	Protein ZINC INDUCED FACILITATOR-LIKE 1 OS=Arabidopsis thaliana GN=ZIFL1 PE=2 SV=1
	c30329_g1	0.114827	-3.12247
	c40843_g1	0.114827	-3.12247
	c43856_g2	0.114827	-3.12247
	c27918_g1	0.114827	-3.12247
	c41475_g3	0.114582	-3.12555
	c62221_g2	0.114535	-3.12614	A0A0B2RES1	Alpha-glucosidase yihQ OS=Glycine soja GN=glysoja_025849 PE=3 SV=1
	c120987_g1	0.114529	-3.12622
	c36072_g2	0.114278	-3.12938	O64517	Metacaspase-4 OS=Arabidopsis thaliana GN=AMC4 PE=1 SV=1
	c48971_g2	0.114254	-3.12969	P10978	Retrovirus-related Pol polyprotein from transposon TNT 1-94 OS=Nicotiana tabacum PE=2 SV=1
	c60580_g5	0.114239	-3.12987	Q2HV09	Peptidase C1A, papain; Somatotropin hormone; Peptidase C1, propeptide OS=Medicago truncatula GN=MtrDRAFT_AC149038g3v2 PE=3 SV=1
	c65606_g1	0.114138	-3.13115
	c63198_g5	0.114001	-3.13288	Q40392	TMV resistance protein N OS=Nicotiana glutinosa GN=N PE=1 SV=1
	c2688_g1	0.113895	-3.13422
	c45950_g2	0.113771	-3.13579	P98204	Phospholipid-transporting ATPase 1 OS=Arabidopsis thaliana GN=ALA1 PE=2 SV=1
	c63318_g1	0.113652	-3.1373	O48781	SPX domain-containing protein 2 OS=Arabidopsis thaliana GN=SPX2 PE=2 SV=1
	c66503_g1	0.11353	-3.13885	Q8L3W1	B3 domain-containing transcription factor VRN1 OS=Arabidopsis thaliana GN=VRN1 PE=1 SV=1
	c57790_g1	0.113445	-3.13993	Q94BZ1	Protein ZINC INDUCED FACILITATOR-LIKE 1 OS=Arabidopsis thaliana GN=ZIFL1 PE=2 SV=1
	c135444_g1	0.113436	-3.14005	P49293	Phytoene synthase, chloroplastic OS=Cucumis melo GN=PSY PE=2 SV=1
	c127965_g1	0.113319	-3.14154
	c52325_g1	0.113146	-3.14374
	c60914_g15	0.11288	-3.14714	Q6LA43	Two-component response regulator-like APRR2 OS=Arabidopsis thaliana GN=APRR2 PE=2 SV=2
	c36317_g1	0.112872	-3.14724	Q9SAK5	Myb family transcription factor APL OS=Arabidopsis thaliana GN=APL PE=2 SV=2
	c61512_g3	0.112872	-3.14724	Q6YU51	Probable 1-deoxy-D-xylulose-5-phosphate synthase 2, chloroplastic OS=Oryza sativa subsp. japonica GN=Os07g0190000 PE=2 SV=1
	c37627_g1	0.112849	-3.14753
	c60575_g8	0.112778	-3.14845	Q681X4	Zinc finger protein ZAT5 OS=Arabidopsis thaliana GN=ZAT5 PE=2 SV=1
	c139561_g1	0.112246	-3.15526	Q9FLC0	Peroxidase 52 OS=Arabidopsis thaliana GN=PER52 PE=2 SV=1
	c109244_g1	0.112246	-3.15526
	c125954_g1	0.112246	-3.15526	Q9ZT50	E3 ubiquitin-protein ligase RHA2A OS=Arabidopsis thaliana GN=RHA2A PE=1 SV=1
	c125940_g1	0.112245	-3.15527
	c60304_g1	0.112245	-3.15528	Q6Z1D5	Autophagy-related protein 8C OS=Oryza sativa subsp. japonica GN=ATG8C PE=2 SV=1
	c55051_g2	0.111994	-3.1585
	c65874_g1	0.111994	-3.1585
	c27426_g1	0.111994	-3.1585
	c57874_g2	0.111834	-3.16057	Q94CD5	Ubiquitin-like modifier-activating enzyme atg7 OS=Arabidopsis thaliana GN=ATG7 PE=1 SV=1
	c61003_g1	0.111717	-3.16207	O48837	Receptor like protein kinase S.2 OS=Arabidopsis thaliana GN=LECRKS2 PE=2 SV=2
	c64293_g1	0.111666	-3.16273	Q9SGS5	Uncharacterized protein At1g76070 OS=Arabidopsis thaliana GN=At1g76070 PE=1 SV=1
	c106314_g1	0.111467	-3.16531	Q9LZL3	Aspartic proteinase PCS1 OS=Arabidopsis thaliana GN=PCS1 PE=2 SV=1
	c55472_g1	0.111406	-3.1661	A0A151TWB0	RNA polymerase-associated protein C651.09c family OS=Cajanus cajan GN=KK1_010566 PE=4 SV=1
	c60861_g6	0.11139	-3.16631	Q8RX77	Protein NRT1/ PTR FAMILY 2.13 OS=Arabidopsis thaliana GN=NPF2.13 PE=1 SV=1
	c9297_g1	0.11135	-3.16683	Q9ZQ96	UDP-glycosyltransferase 73C3 OS=Arabidopsis thaliana GN=UGT73C3 PE=2 SV=1
	c61582_g8	0.111326	-3.16714
	c78328_g1	0.110582	-3.17681
	c54170_g1	0.110562	-3.17707	Q9SUR3	Reticulon-like protein B1 OS=Arabidopsis thaliana GN=RTNLB1 PE=1 SV=1
	c54067_g2	0.110383	-3.17941	Q9SVG4	Reticuline oxidase-like protein OS=Arabidopsis thaliana GN=At4g20830 PE=1 SV=2
	c147261_g1	0.110351	-3.17983
	c62741_g6	0.110323	-3.1802
	c46113_g1	0.11014	-3.18259
	c55382_g2	0.10992	-3.18547	Q8VWJ2	Probable WRKY transcription factor 28 OS=Arabidopsis thaliana GN=WRKY28 PE=2 SV=1
	c86331_g1	0.109879	-3.18601
	c144183_g1	0.109846	-3.18644
	c41475_g1	0.109725	-3.18803
	c563_g1	0.109714	-3.18818	Q9M7J9	Potassium transporter 8 OS=Arabidopsis thaliana GN=POT8 PE=2 SV=2
	c47702_g1	0.109621	-3.1894	Q8VZG8	Probable LRR receptor-like serine/threonine-protein kinase At4g08850 OS=Arabidopsis thaliana GN=At4g08850 PE=2 SV=3
	c62949_g1	0.109621	-3.1894
	c61233_g1	0.109602	-3.18965	Q06548	Protein kinase APK1A, chloroplastic OS=Arabidopsis thaliana GN=APK1A PE=2 SV=1
	c16039_g1	0.109543	-3.19043	Q9LIK7	Putative calcium-transporting ATPase 13, plasma membrane-type OS=Arabidopsis thaliana GN=ACA13 PE=3 SV=1
	c53490_g1	0.109419	-3.19206
	c59250_g3	0.109298	-3.19366	Q9ZUF7	Protein LURP-one-related 6 OS=Arabidopsis thaliana GN=At2g05910 PE=2 SV=1
	c7426_g1	0.109298	-3.19366
	c44302_g1	0.109298	-3.19366
	c60211_g10	0.109298	-3.19366
	c61017_g1	0.109282	-3.19388	Q05349	Auxin-repressed 12.5 kDa protein OS=Fragaria ananassa PE=2 SV=1
	c48122_g1	0.108982	-3.19784
	c59673_g5	0.108874	-3.19927	P32292	Indole-3-acetic acid-induced protein ARG2 OS=Vigna radiata var. radiata GN=ARG2 PE=2 SV=1
	c86879_g1	0.108842	-3.19969	P53393	Low affinity sulfate transporter 3 OS=Stylosanthes hamata GN=ST3 PE=2 SV=1
	c121740_g1	0.108797	-3.20029
	c106274_g1	0.108778	-3.20054	Q56XJ7	Uncharacterized protein At4g22758 OS=Arabidopsis thaliana GN=At4g22758 PE=2 SV=1
	c44756_g1	0.10843	-3.20516
	c62516_g7	0.10843	-3.20516
	c59714_g4	0.108326	-3.20654	F4HW02	GABA transporter 1 OS=Arabidopsis thaliana GN=GAT1 PE=1 SV=1
	c56527_g1	0.108319	-3.20665	Q9FLJ2	NAC domain-containing protein 100 OS=Arabidopsis thaliana GN=NAC100 PE=2 SV=1
	c50210_g1	0.1081	-3.20957
	c101716_g1	0.108081	-3.20981
	c38550_g1	0.108061	-3.21008	Q9CAB7	Probable peroxygenase 4 OS=Arabidopsis thaliana GN=PXG4 PE=1 SV=1
	c53442_g2	0.108059	-3.21011	A0A0B2PHS5	Chaperone protein dnaJ 20, chloroplastic OS=Glycine soja GN=glysoja_027339 PE=4 SV=1
	c47682_g1	0.108049	-3.21025	Q8LPR5	Transcription factor TCP4 OS=Arabidopsis thaliana GN=TCP4 PE=1 SV=1
	c67944_g1	0.108032	-3.21047
	c49278_g1	0.107726	-3.21456
	c79711_g1	0.107276	-3.22059
	c111311_g1	0.107198	-3.22166
	c56135_g1	0.107185	-3.22182	P0C2F6	Putative ribonuclease H protein At1g65750 OS=Arabidopsis thaliana GN=At1g65750 PE=3 SV=1
	c26652_g1	0.107082	-3.22321
	c92455_g1	0.106987	-3.2245
	c11417_g1	0.106893	-3.22576
	c58498_g3	0.106893	-3.22576
	c73035_g1	0.106729	-3.22798	O81902	U-box domain-containing protein 8 OS=Arabidopsis thaliana GN=PUB8 PE=2 SV=1
	c78215_g1	0.106602	-3.2297	Q9FLN0	GDSL esterase/lipase 1 OS=Arabidopsis thaliana GN=GLIP1 PE=1 SV=1
	c57767_g3	0.106602	-3.2297	Q43147	Cytochrome P450 85A1 OS=Solanum lycopersicum GN=CYP85A1 PE=2 SV=1
	c10793_g1	0.106547	-3.23043	Q9ZP41	EG45-like domain containing protein OS=Citrus jambhiri GN=CjBAp12 PE=1 SV=1
	c65121_g1	0.106323	-3.23348
	c58655_g2	0.106131	-3.23608	Q9ZWB4	Coumaroyl-CoA:anthocyanidin 3-O-glucoside-6''-O-coumaroyltransferase 1 OS=Arabidopsis thaliana GN=3AT1 PE=1 SV=1
	c55097_g4	0.106052	-3.23716	A2ZW16	Phospholipase A1-II 1 OS=Oryza sativa subsp. japonica GN=Os01g0651100 PE=3 SV=2
	c54899_g2	0.106016	-3.23764	Q9LRZ5	Phospholipase D p1 OS=Arabidopsis thaliana GN=PLDP1 PE=1 SV=1
	c54931_g4	0.10568	-3.24223	Q9LPL4	F-box protein SKP2A OS=Arabidopsis thaliana GN=SKP2A PE=1 SV=1
	c26844_g1	0.105643	-3.24273	Q9LVL5	Probable serine/threonine-protein kinase WNK4 OS=Arabidopsis thaliana GN=WNK4 PE=1 SV=1
	c30107_g1	0.105553	-3.24396
	c98635_g1	0.105553	-3.24396
	c43965_g1	0.105553	-3.24396
	c57676_g2	0.105352	-3.24671
	c47788_g1	0.10502	-3.25126
	c40703_g1	0.104737	-3.25516	Q9FLE8	Uncharacterized protein At5g39865 OS=Arabidopsis thaliana GN=At5g39865 PE=2 SV=1
	c124736_g1	0.104577	-3.25736
	c51566_g1	0.104278	-3.2615
	c38704_g1	0.104278	-3.2615
	c93224_g1	0.10422	-3.2623
	c93265_g1	0.104115	-3.26374	Q850K7	Expansin-like B1 OS=Oryza sativa subsp. japonica GN=EXLB1 PE=2 SV=2
	c112348_g1	0.104034	-3.26487
	c44072_g1	0.103708	-3.2694	Q96452	14-3-3-like protein C OS=Glycine max GN=GF14C PE=1 SV=1
	c51948_g2	0.103515	-3.27209	Q8GXL3	Squamosa promoter-binding-like protein 8 OS=Arabidopsis thaliana GN=SPL8 PE=1 SV=2
	c62772_g13	0.103515	-3.27209
	c88411_g1	0.103515	-3.27209
	c61800_g3	0.103515	-3.27209
	c700_g1	0.103515	-3.27209	Q9SCN8	Cell division control protein 48 homolog D OS=Arabidopsis thaliana GN=CDC48D PE=1 SV=1
	c22401_g1	0.103515	-3.27209
	c47168_g2	0.103479	-3.27259
	c48506_g2	0.103405	-3.27362	Q67YE6	Zinc finger AN1 domain-containing stress-associated protein 12 OS=Arabidopsis thaliana GN=SAP12 PE=2 SV=2
	c94339_g1	0.103306	-3.275	P43082	Hevein-like preproprotein OS=Arabidopsis thaliana GN=HEL PE=1 SV=1
	c25021_g1	0.103287	-3.27527	Q96289	Zinc finger protein ZAT10 OS=Arabidopsis thaliana GN=ZAT10 PE=2 SV=1
	c61585_g2	0.10325	-3.27579
	c53852_g2	0.102877	-3.28101
	c99703_g1	0.102851	-3.28137
	c60861_g2	0.102813	-3.28191	Q8RX77	Protein NRT1/ PTR FAMILY 2.13 OS=Arabidopsis thaliana GN=NPF2.13 PE=1 SV=1
	c130192_g1	0.102792	-3.28221
	c34044_g1	0.102497	-3.28634	Q9SJG4	AT-hook motif nuclear-localized protein 16 OS=Arabidopsis thaliana GN=AHL16 PE=1 SV=1
	c15227_g1	0.102497	-3.28634
	c45960_g1	0.102497	-3.28634
	c85774_g1	0.102497	-3.28634	Q9LHL6	Protein trichome birefringence-like 1 OS=Arabidopsis thaliana GN=TBL1 PE=2 SV=1
	c141403_g1	0.102497	-3.28634	Q9C8M2	Peptide methionine sulfoxide reductase B1, chloroplastic OS=Arabidopsis thaliana GN=MSRB1 PE=1 SV=1
	c60711_g4	0.102497	-3.28634
	c47714_g3	0.102497	-3.28634
	c18769_g1	0.102395	-3.28778	Q42798	3,9-dihydroxypterocarpan 6A-monooxygenase OS=Glycine max GN=CYP93A1 PE=1 SV=1
	c49937_g2	0.102175	-3.29089
	c35678_g1	0.102	-3.29335	Q682U6	Exonuclease DPD1, chloroplastic/mitochondrial OS=Arabidopsis thaliana GN=DPD1 PE=1 SV=1
	c37676_g1	0.101937	-3.29426	Q949Z1	Polygalacturonase At1g48100 OS=Arabidopsis thaliana GN=At1g48100 PE=2 SV=1
	c56168_g1	0.101854	-3.29543	Q8GUM4	Uncharacterized membrane protein At3g27390 OS=Arabidopsis thaliana GN=At3g27390 PE=1 SV=2
	c39821_g1	0.101582	-3.29929
	c58124_g4	0.101565	-3.29953	Q93YS4	ABC transporter G family member 22 OS=Arabidopsis thaliana GN=ABCG22 PE=1 SV=1
	c36297_g1	0.101442	-3.30128	Q9FNL7	Protein NRT1/ PTR FAMILY 5.2 OS=Arabidopsis thaliana GN=NPF5.2 PE=2 SV=1
	c98172_g1	0.101195	-3.30479	P33082	Auxin-induced protein X15 OS=Glycine max PE=2 SV=1
	c46180_g1	0.101073	-3.30653	C6SZ04	CASP-like protein 2C1 OS=Glycine max PE=2 SV=1
	c60845_g1	0.100804	-3.31037	Q6NKX1	Proline dehydrogenase 2, mitochondrial OS=Arabidopsis thaliana GN=POX2 PE=2 SV=1
	c64173_g1	0.100747	-3.31119	Q94CL9	Cyclin-dependent kinase inhibitor 7 OS=Arabidopsis thaliana GN=KRP7 PE=1 SV=2
	c32515_g1	0.100693	-3.31197	O80961	MLO-like protein 12 OS=Arabidopsis thaliana GN=MLO12 PE=2 SV=2
	c136120_g1	0.100494	-3.31482
	c58662_g8	0.100261	-3.31816	Q8L518	Probable choline kinase 2 OS=Arabidopsis thaliana GN=At1g74320 PE=2 SV=1
	c53074_g5	0.100203	-3.319	Q9LZS0	Trihelix transcription factor PTL OS=Arabidopsis thaliana GN=PTL PE=2 SV=1
	c14591_g1	0.100143	-3.31987	F4HY61	NAC domain-containing protein 10 OS=Arabidopsis thaliana GN=NAC010 PE=2 SV=1
	c36777_g2	0.099955	-3.32258
	c18092_g1	0.099917	-3.32313
	c61060_g9	0.0998986	-3.32339	Q680Z7	Pentatricopeptide repeat-containing protein At1g09220, mitochondrial OS=Arabidopsis thaliana GN=PCMP-E25 PE=2 SV=1
	c2101_g1	0.0998698	-3.32381
	c33129_g3	0.0998181	-3.32456	O65554	CBL-interacting serine/threonine-protein kinase 6 OS=Arabidopsis thaliana GN=CIPK6 PE=1 SV=1
	c62487_g2	0.0997525	-3.3255	P26204	Non-cyanogenic beta-glucosidase OS=Trifolium repens PE=1 SV=1
	c51316_g1	0.0996982	-3.32629
	c18306_g1	0.0996133	-3.32752
	c14399_g1	0.0996133	-3.32752
	c62280_g2	0.0996133	-3.32752
	c65969_g1	0.0994619	-3.32971	Q5S4V7	F-box protein At2g39490 OS=Arabidopsis thaliana GN=At2g39490 PE=2 SV=1
	c65520_g1	0.0994619	-3.32971	Q39891	Probable 2-isopropylmalate synthase OS=Glycine max GN=GMN56 PE=2 SV=1
	c121623_g1	0.0994619	-3.32971
	c115591_g1	0.0994619	-3.32971	P10978	Retrovirus-related Pol polyprotein from transposon TNT 1-94 OS=Nicotiana tabacum PE=2 SV=1
	c60751_g6	0.0993481	-3.33136
	c54635_g1	0.0987169	-3.34056
	c53837_g2	0.098154	-3.34881	O22822	UDP-glycosyltransferase 74F2 OS=Arabidopsis thaliana GN=UGT74F2 PE=1 SV=1
	c134342_g1	0.0981339	-3.34911	O04722	Sulfate transporter 2.1 OS=Arabidopsis thaliana GN=SULTR2;1 PE=2 SV=1
	c107615_g1	0.0979883	-3.35125
	c58646_g3	0.0978087	-3.35389	P81391	Myb-related protein 305 OS=Antirrhinum majus GN=MYB305 PE=2 SV=1
	c61200_g4	0.0978005	-3.35401	Q9ZV48	Probable alpha,alpha-trehalose-phosphate synthase [UDP-forming] 11 OS=Arabidopsis thaliana GN=TPS11 PE=2 SV=1
	c57926_g2	0.097556	-3.35763	Q9SK55	Transcription factor JUNGBRUNNEN 1 OS=Arabidopsis thaliana GN=JUB1 PE=1 SV=1
	c63235_g9	0.0974738	-3.35884	P10978	Retrovirus-related Pol polyprotein from transposon TNT 1-94 OS=Nicotiana tabacum PE=2 SV=1
	c45937_g1	0.0973587	-3.36055	A0A151SGF0	RING finger protein 141 family OS=Cajanus cajan GN=KK1_024392 PE=4 SV=1
	c136335_g1	0.0968871	-3.36755
	c53943_g1	0.0968353	-3.36832
	c122721_g1	0.0968353	-3.36832	Q9ZUS1	WAT1-related protein At2g37460 OS=Arabidopsis thaliana GN=At2g37460 PE=2 SV=1
	c46014_g1	0.0968353	-3.36832	A0A0B2RES1	Alpha-glucosidase yihQ OS=Glycine soja GN=glysoja_025849 PE=3 SV=1
	c69166_g1	0.0968353	-3.36832
	c44079_g2	0.0967777	-3.36918	P42751	Cyclin-D1-1 OS=Arabidopsis thaliana GN=CYCD1-1 PE=1 SV=3
	c38739_g1	0.0967624	-3.36941	Q7XA06	Synaptotagmin-3 OS=Arabidopsis thaliana GN=SYT3 PE=2 SV=1
	c120678_g1	0.0966784	-3.37066	P25317	Probable glutathione S-transferase parA OS=Nicotiana tabacum GN=PARA PE=2 SV=1
	c61269_g3	0.0962853	-3.37654
	c120505_g1	0.0962734	-3.37672
	c61957_g3	0.0959639	-3.38137	A7VLV1	Protein STAY-GREEN, chloroplastic OS=Pisum sativum GN=SGR PE=2 SV=1
	c9074_g1	0.0958434	-3.38318
	c60751_g7	0.0958052	-3.38375	Q05349	Auxin-repressed 12.5 kDa protein OS=Fragaria ananassa PE=2 SV=1
	c142757_g1	0.0957143	-3.38512
	c46240_g1	0.0957143	-3.38512	Q9LIR9	Probable magnesium transporter NIPA1 OS=Arabidopsis thaliana GN=At3g23870 PE=2 SV=1
	c61094_g9	0.0957143	-3.38512
	c80842_g1	0.0957143	-3.38512
	c54217_g1	0.0957143	-3.38512
	c36701_g2	0.0957143	-3.38512	Q9LY29	Ethylene-responsive transcription factor ERF115 OS=Arabidopsis thaliana GN=ERF115 PE=1 SV=1
	c114916_g1	0.0957143	-3.38512
	c127125_g1	0.0957143	-3.38512
	c60766_g5	0.0957143	-3.38512
	c44530_g2	0.0955039	-3.3883
	c47649_g1	0.0954095	-3.38972	P34802	Heterodimeric geranylgeranyl pyrophosphate synthase large subunit 1, chloroplastic OS=Arabidopsis thaliana GN=GGPPS1 PE=1 SV=2
	c60861_g4	0.0953792	-3.39018	Q8RX77	Protein NRT1/ PTR FAMILY 2.13 OS=Arabidopsis thaliana GN=NPF2.13 PE=1 SV=1
	c55838_g2	0.0953792	-3.39018
	c40612_g1	0.0951405	-3.3938	G7L823	Transcription regulator OS=Medicago truncatula GN=MTR_8g088170 PE=4 SV=1
	c50745_g1	0.0947011	-3.40048	Q8L518	Probable choline kinase 2 OS=Arabidopsis thaliana GN=At1g74320 PE=2 SV=1
	c33743_g2	0.0947001	-3.40049	Q9LN49	3-ketoacyl-CoA synthase 4 OS=Arabidopsis thaliana GN=KCS4 PE=2 SV=1
	c18682_g1	0.0947001	-3.40049	Q9LP56	Probable WRKY transcription factor 65 OS=Arabidopsis thaliana GN=WRKY65 PE=2 SV=1
	c60861_g5	0.094694	-3.40058	Q8RX77	Protein NRT1/ PTR FAMILY 2.13 OS=Arabidopsis thaliana GN=NPF2.13 PE=1 SV=1
	c115955_g1	0.0946405	-3.4014	Q9M439	Branched-chain-amino-acid aminotransferase 2, chloroplastic OS=Arabidopsis thaliana GN=BCAT2 PE=1 SV=1
	c61689_g9	0.0944976	-3.40358
	c59618_g2	0.0943671	-3.40557	Q8S403	Phosphate transporter PHO1 OS=Arabidopsis thaliana GN=PHO1 PE=2 SV=1
	c46147_g1	0.0943063	-3.4065	Q9SVM8	Glycine-rich RNA-binding protein 2, mitochondrial OS=Arabidopsis thaliana GN=RBG2 PE=1 SV=1
	c95810_g1	0.0940503	-3.41042
	c62280_g4	0.0940503	-3.41042
	c78499_g1	0.093914	-3.41252	Q672F7	Tricyclene synthase EBOS, chloroplastic OS=Lotus japonicus GN=EBOS PE=1 SV=1
	c15488_g1	0.093712	-3.41562	Q96522	Peroxidase 45 OS=Arabidopsis thaliana GN=PER45 PE=1 SV=1
	c42875_g1	0.0936435	-3.41668
	c59626_g1	0.0936013	-3.41733	Q9M276	Homeobox-leucine zipper protein ATHB-12 OS=Arabidopsis thaliana GN=ATHB-12 PE=2 SV=1
	c41956_g3	0.0932853	-3.42221	Q9FGQ2	Bidirectional sugar transporter SWEET13 OS=Arabidopsis thaliana GN=SWEET13 PE=2 SV=1
	c59713_g3	0.0932084	-3.4234	Q9LU33	Glycolipid transfer protein 3 OS=Arabidopsis thaliana GN=GLTP3 PE=2 SV=1
	c63356_g5	0.0930258	-3.42623	Q8RY67	Wall-associated receptor kinase-like 14 OS=Arabidopsis thaliana GN=WAKL14 PE=2 SV=2
	c49121_g2	0.092872	-3.42861	Q8GXZ3	Serine/threonine-protein kinase At5g01020 OS=Arabidopsis thaliana GN=At5g01020 PE=1 SV=1
	c54067_g1	0.0928463	-3.42901	A6P6V9	Cannabidiolic acid synthase OS=Cannabis sativa GN=CBDAS PE=1 SV=1
	c39004_g1	0.0928324	-3.42923	Q9AVK0	7-methylxanthosine synthase 1 OS=Coffea arabica GN=XMT1 PE=1 SV=1
	c33532_g1	0.092717	-3.43102	Q9FLJ2	NAC domain-containing protein 100 OS=Arabidopsis thaliana GN=NAC100 PE=2 SV=1
	c32459_g1	0.092717	-3.43102
	c50501_g2	0.0926631	-3.43186	Q9SGU9	Methionine gamma-lyase OS=Arabidopsis thaliana GN=MGL PE=1 SV=1
	c35695_g1	0.0923776	-3.43631
	c28095_g1	0.0922388	-3.43848	Q9LR67	Pentatricopeptide repeat-containing protein At1g03560, mitochondrial OS=Arabidopsis thaliana GN=At1g03560 PE=2 SV=1
	c55287_g2	0.0922388	-3.43848
	c39175_g2	0.0922388	-3.43848
	c92245_g1	0.0921271	-3.44023
	c20927_g1	0.0919249	-3.4434
	c60061_g8	0.0919249	-3.4434
	c48288_g1	0.0918593	-3.44443
	c62280_g5	0.0918593	-3.44443
	c6187_g1	0.0917847	-3.4456	Q9LHE3	Protein ASPARTIC PROTEASE IN GUARD CELL 2 OS=Arabidopsis thaliana GN=ASPG2 PE=2 SV=1
	c53801_g1	0.0916134	-3.4483	F4I9E1	Protein NUCLEAR FUSION DEFECTIVE 4 OS=Arabidopsis thaliana GN=NFD4 PE=3 SV=1
	c68316_g1	0.0914739	-3.4505	Q8VZS8	Abscisic acid receptor PYL1 OS=Arabidopsis thaliana GN=PYL1 PE=1 SV=1
	c80818_g1	0.091421	-3.45133
	c46912_g1	0.0914103	-3.4515	A0A151TKN2	Endoglucanase E1 OS=Cajanus cajan GN=KK1_023958 PE=3 SV=1
	c29342_g1	0.0914043	-3.45159	Q96453	14-3-3-like protein D OS=Glycine max GN=GF14D PE=1 SV=1
	c49069_g2	0.0914043	-3.45159
	c52911_g2	0.0913006	-3.45323
	c54723_g1	0.0912615	-3.45385
	c28609_g1	0.0912365	-3.45425	Q93VY3	NAC domain-containing protein 72 OS=Arabidopsis thaliana GN=NAC072 PE=2 SV=1
	c35640_g1	0.0908315	-3.46066
	c47134_g1	0.090783	-3.46143	Q9SD62	Putative receptor-like protein kinase At3g47110 OS=Arabidopsis thaliana GN=At3g47110 PE=3 SV=1
	c80646_g1	0.0907423	-3.46208
	c33743_g1	0.0906437	-3.46365	Q9LN49	3-ketoacyl-CoA synthase 4 OS=Arabidopsis thaliana GN=KCS4 PE=2 SV=1
	c92331_g1	0.0906117	-3.46416	Q9FYB5	Chaperone protein dnaJ 11, chloroplastic OS=Arabidopsis thaliana GN=ATJ11 PE=1 SV=2
	c931_g1	0.0905461	-3.4652
	c62060_g7	0.0905461	-3.4652	Q04672	Sucrose-binding protein OS=Glycine max GN=SBP PE=1 SV=1
	c56202_g3	0.0904489	-3.46675	Q9FF99	Probable amino acid permease 7 OS=Arabidopsis thaliana GN=AAP7 PE=2 SV=1
	c65880_g1	0.0904433	-3.46684
	c96364_g1	0.0901607	-3.47136
	c3161_g1	0.0900269	-3.4735
	c4716_g1	0.0898686	-3.47604
	c124980_g1	0.0897795	-3.47747
	c48737_g4	0.0897136	-3.47853	Q9FFZ1	Pheophytinase, chloroplastic OS=Arabidopsis thaliana GN=PPH PE=1 SV=1
	c36779_g1	0.0897011	-3.47873	P0C2F6	Putative ribonuclease H protein At1g65750 OS=Arabidopsis thaliana GN=At1g65750 PE=3 SV=1
	c3493_g1	0.0896738	-3.47917	Q6DBP4	Pectin acetylesterase 8 OS=Arabidopsis thaliana GN=PAE8 PE=2 SV=1
	c61281_g6	0.0895361	-3.48139
	c48791_g1	0.0894003	-3.48358	Q9LUE3	Bidirectional sugar transporter SWEET10 OS=Arabidopsis thaliana GN=SWEET10 PE=2 SV=1
	c41304_g1	0.0892771	-3.48557	A0A0B2RAA5	Putative N-acetyltransferase p20 OS=Glycine soja GN=glysoja_033223 PE=4 SV=1
	c36912_g1	0.0891472	-3.48767	Q9M0G0	Gamma-glutamyltranspeptidase 3 OS=Arabidopsis thaliana GN=GGT3 PE=2 SV=1
	c50200_g2	0.089007	-3.48994
	c201_g1	0.089007	-3.48994
	c61609_g8	0.089007	-3.48994
	c97488_g1	0.089007	-3.48994	Q9SZ67	Probable WRKY transcription factor 19 OS=Arabidopsis thaliana GN=WRKY19 PE=2 SV=1
	c98739_g1	0.089007	-3.48994
	c45335_g3	0.089007	-3.48994	Q38850	Transcription repressor MYB5 OS=Arabidopsis thaliana GN=MYB5 PE=1 SV=1
[truncated: 935 more rows]

## Sheet: Table S10
Table S10. List and annotation of differentially expressed genes (DEGs) between PAB and PNAB with PPDE < 0.05.
	Unigene ID	FC	log2FC	UniProt Acc. No	Gene description
	c59646_g2	7551.39	12.8825	Q39111	Gibberellin 20 oxidase 2 OS=Arabidopsis thaliana GN=GA20OX2 PE=2 SV=1
	c56315_g2	1630.54	10.6711
	c55688_g1	1300.83	10.3452
	c55972_g1	1195.32	10.2232
	c47085_g1	1149.58	10.1669
	c33206_g1	731.442	9.5146	Q03211	Pistil-specific extensin-like protein OS=Nicotiana tabacum PE=2 SV=1
	c59893_g2	484.61	8.92068
	c141625_g1	449.759	8.81301	Q9LZX4	Fasciclin-like arabinogalactan protein 10 OS=Arabidopsis thaliana GN=FLA10 PE=1 SV=1
	c60896_g9	446.487	8.80247	Q9C5Y2	Ent-kaurenoic acid oxidase 2 OS=Arabidopsis thaliana GN=KAO2 PE=2 SV=2
	c59718_g1	384.554	8.58704	Q9FKK2	Agamous-like MADS-box protein AGL62 OS=Arabidopsis thaliana GN=AGL62 PE=1 SV=1
	c79451_g1	371.969	8.53904
	c113050_g1	301.862	8.23775
	c39089_g1	272.07	8.08783
	c16874_g1	243.4	7.92719	P60496	Chemocyanin OS=Lilium longiflorum PE=1 SV=1
	c61069_g1	242.081	7.91935	Q40901	Defensin-like protein OS=Petunia integrifolia PE=2 SV=1
	c99329_g1	239.725	7.90524
	c34229_g1	233.303	7.86606
	c109809_g1	204.908	7.67883
	c59787_g2	199.542	7.64055	P27057	Protein GAST1 OS=Solanum lycopersicum GN=GAST1 PE=2 SV=1
	c55738_g1	198.373	7.63207
	c125703_g1	195.098	7.60806	O22126	Fasciclin-like arabinogalactan protein 8 OS=Arabidopsis thaliana GN=FLA8 PE=1 SV=1
	c16180_g1	189.366	7.56503
	c21937_g1	187.388	7.54989
	c54927_g1	177.26	7.46972	Q6TLJ2	Protein TAPETUM DETERMINANT 1 OS=Arabidopsis thaliana GN=TPD1 PE=1 SV=1
	c15014_g1	167.131	7.38484
	c58356_g1	164.668	7.36342	P24397	Hyoscyamine 6-dioxygenase OS=Hyoscyamus niger GN=H6H PE=1 SV=1
	c35897_g2	154.302	7.26961	Q39111	Gibberellin 20 oxidase 2 OS=Arabidopsis thaliana GN=GA20OX2 PE=2 SV=1
	c55210_g1	147.196	7.20159
	c92621_g1	145.524	7.18511	P94111	Protein STRICTOSIDINE SYNTHASE-LIKE 12 OS=Arabidopsis thaliana GN=SSL12 PE=2 SV=2
	c8500_g1	140.578	7.13523
	c48699_g1	132.047	7.04491	Q9FLJ2	NAC domain-containing protein 100 OS=Arabidopsis thaliana GN=NAC100 PE=2 SV=1
	c57936_g1	129.319	7.01479	Q8LC95	Early nodulin-like protein 3 OS=Arabidopsis thaliana GN=At5g25090 PE=1 SV=2
	c56081_g1	128.772	7.00867	Q39548	Ent-kaur-16-ene synthase, chloroplastic OS=Cucurbita maxima PE=1 SV=1
	c107232_g1	124.284	6.9575	Q93ZB2	Ent-kaurene oxidase, chloroplastic OS=Arabidopsis thaliana GN=KO PE=1 SV=2
	c60410_g2	117.84	6.88068	P82007	Non-specific lipid-transfer protein AP10 OS=Helianthus annuus PE=1 SV=2
	c48035_g1	112.438	6.81299	O04408	Ent-copalyl diphosphate synthase, chloroplastic OS=Pisum sativum PE=2 SV=1
	c115202_g1	110.347	6.78591
	c39931_g1	108.387	6.76005	Q9C5Y2	Ent-kaurenoic acid oxidase 2 OS=Arabidopsis thaliana GN=KAO2 PE=2 SV=2
	c62155_g3	108.387	6.76005
	c52420_g3	107.891	6.75343	Q94JM3	Auxin response factor 2 OS=Arabidopsis thaliana GN=ARF2 PE=1 SV=2
	c59449_g2	100.959	6.65763	Q56WF8	Serine carboxypeptidase-like 48 OS=Arabidopsis thaliana GN=SCPL48 PE=2 SV=2
	c63240_g1	94.2071	6.55776	Q9LIR8	F-box/kelch-repeat protein At3g23880 OS=Arabidopsis thaliana GN=At3g23880 PE=2 SV=1
	c61034_g1	93.3519	6.54461	O49859	Cytochrome P450 82A4 OS=Glycine max GN=CYP82A4 PE=2 SV=1
	c48699_g2	91.9775	6.52321
	c121540_g1	91.5062	6.5158	F4JXC5	Subtilisin-like protease SBT5.4 OS=Arabidopsis thaliana GN=SBT5.4 PE=1 SV=1
	c40957_g1	75.3008	6.23459	Q6ID70	Uncharacterized protein At3g03773 OS=Arabidopsis thaliana GN=At3g03773 PE=1 SV=1
	c33391_g1	73.2751	6.19525	P54767	Glutamate decarboxylase OS=Solanum lycopersicum PE=1 SV=1
	c42384_g1	71.2494	6.15481	Q9ZQI8	Non-specific lipid-transfer protein-like protein At2g13820 OS=Arabidopsis thaliana GN=At2g13820 PE=1 SV=1
	c58446_g1	68.8966	6.10636
	c29720_g1	67.1981	6.07035	Q9SND9	Uncharacterized acetyltransferase At3g50280 OS=Arabidopsis thaliana GN=At3g50280 PE=3 SV=1
	c52420_g4	63.1467	5.98064	Q94JM3	Auxin response factor 2 OS=Arabidopsis thaliana GN=ARF2 PE=1 SV=2
	c60701_g4	60.4458	5.91757	Q84WP6	NAC domain-containing protein 43 OS=Arabidopsis thaliana GN=NAC043 PE=2 SV=2
	c63550_g1	53.6434	5.74533	P25974	Beta-conglycinin, beta chain OS=Glycine max GN=CG-4 PE=1 SV=1
	c57196_g1	53.2243	5.73401	Q2QYH7	Cytochrome P450 714C2 OS=Oryza sativa subsp. japonica GN=CYP714C2 PE=2 SV=1
	c54485_g2	50.9927	5.67222	Q9LFW3	COBRA-like protein 4 OS=Arabidopsis thaliana GN=COBL4 PE=2 SV=2
	c62105_g16	48.967	5.61374	Q9M0H6	Mannan endo-1,4-beta-mannosidase 5 OS=Arabidopsis thaliana GN=MAN5 PE=2 SV=1
	c59493_g2	48.7188	5.60641
	c49147_g2	48.1152	5.58842	Q39231	Sucrose transport protein SUC2 OS=Arabidopsis thaliana GN=SUC2 PE=1 SV=2
	c54902_g1	48.1152	5.58842	Q9FLX8	Probable WRKY transcription factor 27 OS=Arabidopsis thaliana GN=WRKY27 PE=2 SV=1
	c143209_g1	47.6165	5.57339
	c106347_g1	47.6165	5.57339	Q9FXA3	Transcription factor bHLH95 OS=Arabidopsis thaliana GN=BHLH95 PE=2 SV=2
	c23862_g1	46.2784	5.53227	M5WS10	Uncharacterized protein OS=Prunus persica GN=PRUPE_ppa005895mg PE=4 SV=1
	c121158_g1	45.6587	5.51282	Q9M363	Cytochrome b561 and DOMON domain-containing protein At3g61750 OS=Arabidopsis thaliana GN=At3g61750 PE=3 SV=1
	c54485_g1	45.5909	5.51067	Q9LFW3	COBRA-like protein 4 OS=Arabidopsis thaliana GN=COBL4 PE=2 SV=2
	c139095_g1	43.6115	5.44664
	c41074_g2	42.7927	5.41929	Q8SAG3	Actin-depolymerizing factor OS=Vitis vinifera PE=2 SV=1
	c13619_g1	41.3522	5.36989	Q9C523	Dirigent protein 19 OS=Arabidopsis thaliana GN=DIR19 PE=2 SV=1
	c96141_g1	40.1891	5.32873	F4KDH9	FIP1[V]-like protein OS=Arabidopsis thaliana GN=FIPS5 PE=1 SV=1
	c30397_g1	40.1891	5.32873
	c49147_g1	39.8777	5.31751	Q67YF8	Sucrose transport protein SUC7 OS=Arabidopsis thaliana GN=SUC7 PE=2 SV=2
	c110000_g1	38.8386	5.27942	P10978	Retrovirus-related Pol polyprotein from transposon TNT 1-94 OS=Nicotiana tabacum PE=2 SV=1
	c96574_g1	38.1634	5.25412	O49687	Transcription factor MYC4 OS=Arabidopsis thaliana GN=MYC4 PE=1 SV=1
	c62015_g1	36.8418	5.20327	Q5YGP7	AP2-like ethylene-responsive transcription factor PLT2 OS=Arabidopsis thaliana GN=PLT2 PE=2 SV=1
	c22524_g1	35.4625	5.14822
	c58189_g1	35.4625	5.14822	Q9LXD9	Probable pectinesterase/pectinesterase inhibitor 51 OS=Arabidopsis thaliana GN=PME51 PE=2 SV=1
	c62268_g2	34.6042	5.11288
	c63740_g1	33.7854	5.07833	A0A151RE46	Retrovirus-related Pol polyprotein from transposon TNT 1-94 OS=Cajanus cajan GN=KK1_037831 PE=4 SV=1
	c57844_g3	33.4368	5.06337	Q9FUY2	Transcriptional corepressor LEUNIG OS=Arabidopsis thaliana GN=LUG PE=1 SV=2
	c57844_g1	32.7616	5.03393	Q9FUY2	Transcriptional corepressor LEUNIG OS=Arabidopsis thaliana GN=LUG PE=1 SV=2
	c11951_g1	32.3115	5.01398	Q9FH92	Protein IRX15-LIKE OS=Arabidopsis thaliana GN=IRX15-L PE=2 SV=1
	c62026_g1	31.8806	4.99461	P17067	Carbonic anhydrase, chloroplastic OS=Pisum sativum PE=1 SV=1
	c20371_g1	31.8806	4.99461
	c51626_g2	31.4111	4.9732	Q9SHE9	LOB domain-containing protein 4 OS=Arabidopsis thaliana GN=LBD4 PE=2 SV=1
	c47416_g1	31.3288	4.96942	P16273	Pathogen-related protein OS=Hordeum vulgare PE=2 SV=2
	c56108_g2	30.7359	4.94185	Q8VXX5	Monocopper oxidase-like protein SKS1 OS=Arabidopsis thaliana GN=SKS1 PE=1 SV=1
	c62989_g1	29.3829	4.87691
	c53128_g2	28.7102	4.84349	P17067	Carbonic anhydrase, chloroplastic OS=Pisum sativum PE=1 SV=1
	c59691_g1	28.4629	4.83101
	c110674_g1	28.4629	4.83101
	c61117_g1	28.0535	4.81011	Q01593	B3 domain-containing transcription factor ABI3 OS=Arabidopsis thaliana GN=ABI3 PE=1 SV=1
	c55453_g2	27.3788	4.77499	Q6BE23	Probable oxidosqualene cyclase OS=Cucurbita pepo GN=CPR PE=2 SV=1
	c135705_g1	27.3598	4.77399	O04500	COBRA-like protein 6 OS=Arabidopsis thaliana GN=COBL6 PE=2 SV=2
	c53566_g1	27.3598	4.77399	Q9LFP7	Probable receptor-like protein kinase At5g15080 OS=Arabidopsis thaliana GN=At5g15080 PE=2 SV=1
	c120726_g1	26.4806	4.72686	Q07502	Defensin-like protein OS=Glycine max PE=3 SV=1
	c59903_g1	26.0063	4.70079	A0A059CTN6	Uncharacterized protein OS=Eucalyptus grandis GN=EUGRSUZ_C03191 PE=4 SV=1
	c107772_g1	26.0063	4.70079	Q1PF50	Probable serine protease EDA2 OS=Arabidopsis thaliana GN=EDA2 PE=2 SV=2
	c59403_g1	25.8055	4.68961	Q8LPH6	Transcription factor MYB86 OS=Arabidopsis thaliana GN=MYB86 PE=2 SV=1
	c57486_g1	25.5969	4.6779
	c46115_g3	24.7619	4.63005	Q9ZPE4	F-box protein FBW2 OS=Arabidopsis thaliana GN=FBW2 PE=1 SV=1
	c48623_g1	24.1717	4.59525	Q93Z79	Cytochrome P450 714A1 OS=Arabidopsis thaliana GN=CYP714A1 PE=2 SV=1
	c9457_g1	23.9837	4.58398	Q9ZTN2	ER lumen protein-retaining receptor OS=Petunia hybrida GN=ERD2 PE=2 SV=1
	c9394_g1	23.9837	4.58398
	c135844_g1	23.5498	4.55764	P40267	Histone H1 OS=Solanum pennellii PE=2 SV=1
	c58535_g2	23.3084	4.54278
	c35710_g1	23.3084	4.54278	Q93Z81	Vacuolar cation/proton exchanger 3 OS=Arabidopsis thaliana GN=CAX3 PE=1 SV=1
	c65053_g1	23.3084	4.54278
	c135881_g1	23.3084	4.54278	Q9SY73	NADPH-dependent pterin aldehyde reductase OS=Arabidopsis thaliana GN=At1g10310 PE=1 SV=1
	c68791_g1	23.0673	4.52778	Q6YU51	Probable 1-deoxy-D-xylulose-5-phosphate synthase 2, chloroplastic OS=Oryza sativa subsp. japonica GN=Os07g0190000 PE=2 SV=1
	c109911_g1	22.731	4.50659	Q41001	Blue copper protein OS=Pisum sativum PE=2 SV=1
	c33795_g1	22.3215	4.48036
	c1300_g1	21.958	4.45667	P08548	LINE-1 reverse transcriptase homolog OS=Nycticebus coucang PE=3 SV=1
	c39322_g3	21.958	4.45667	Q9LYT3	Protein TRANSPARENT TESTA 12 OS=Arabidopsis thaliana GN=TT12 PE=2 SV=1
	c31795_g1	21.958	4.45667	Q39182	Defensin-like protein 2 OS=Arabidopsis thaliana GN=PDF2.2 PE=2 SV=1
	c425_g1	21.9121	4.45366
	c53142_g2	21.524	4.42788	O23939	2-methylene-furan-3-one reductase OS=Fragaria vesca GN=EO PE=2 SV=2
	c65907_g1	21.5027	4.42645
	c42227_g1	21.2828	4.41161	Q9LF10	Chloroplastic group IIA intron splicing facilitator CRS1, chloroplastic OS=Arabidopsis thaliana GN=At5g16180 PE=3 SV=2
	c95461_g1	21.2828	4.41161	Q96520	Peroxidase 12 OS=Arabidopsis thaliana GN=PER12 PE=1 SV=1
	c34246_g1	20.9881	4.3915
	c129041_g1	20.6075	4.3651
	c39099_g1	20.5066	4.35801	Q9LQM1	Probable FBD-associated F-box protein At1g32375 OS=Arabidopsis thaliana GN=At1g32375 PE=3 SV=2
	c61214_g3	20.3784	4.34897	P38417	Linoleate 9S-lipoxygenase-4 OS=Glycine max GN=LOX1.5 PE=1 SV=1
	c41074_g1	20.372	4.34852	Q8SAG3	Actin-depolymerizing factor OS=Vitis vinifera PE=2 SV=1
	c45912_g1	20.1446	4.33232	Q8RWU4	Homeobox-leucine zipper protein MERISTEM L1 OS=Arabidopsis thaliana GN=ATML1 PE=2 SV=1
	c58664_g1	20.0311	4.32417	Q9C942	Caffeoylshikimate esterase OS=Arabidopsis thaliana GN=CSE PE=1 SV=1
	c113588_g1	19.865	4.31216	Q9SII5	Protein EXORDIUM-like 5 OS=Arabidopsis thaliana GN=EXL5 PE=2 SV=1
	c17157_g1	19.2571	4.26732	Q8H0F2	Anthocyanin 3'-O-beta-glucosyltransferase OS=Gentiana triflora PE=1 SV=1
	c19329_g1	19.2571	4.26732
	c50971_g1	19.2445	4.26638	P0C945	Uncharacterized protein At1g21580 OS=Arabidopsis thaliana GN=At1g21580 PE=1 SV=1
	c58123_g1	19.0956	4.25517	Q8LEJ6	Fasciclin-like arabinogalactan protein 11 OS=Arabidopsis thaliana GN=FLA11 PE=2 SV=2
	c108754_g1	18.8219	4.23434	Q9LI74	Protein CHUP1, chloroplastic OS=Arabidopsis thaliana GN=CHUP1 PE=1 SV=1
	c64873_g1	18.7074	4.22554	Q9FE06	Protein EXORDIUM-like 2 OS=Arabidopsis thaliana GN=EXL2 PE=2 SV=1
	c124379_g1	18.6606	4.22192	P25804	Cysteine proteinase 15A OS=Pisum sativum PE=2 SV=1
	c32552_g1	18.6367	4.22008
	c28982_g1	18.6125	4.2182	O04408	Ent-copalyl diphosphate synthase, chloroplastic OS=Pisum sativum PE=2 SV=1
	c33318_g1	18.5819	4.21582	Q9M0I2	Expansin-B3 OS=Arabidopsis thaliana GN=EXPB3 PE=2 SV=2
	c48142_g2	18.5819	4.21582	G7J032	Phytohormone-binding protein OS=Medicago truncatula GN=MTR_3g055120 PE=1 SV=1
	c41139_g2	18.5819	4.21582	Q1PEY6	EPIDERMAL PATTERNING FACTOR-like protein 6 OS=Arabidopsis thaliana GN=EPFL6 PE=1 SV=1
	c57883_g2	18.141	4.18119	P93046	Probable xyloglucan endotransglucosylase/hydrolase protein 31 OS=Arabidopsis thaliana GN=XTH31 PE=2 SV=2
	c55641_g3	17.9066	4.16242	O48766	Endoglucanase 11 OS=Arabidopsis thaliana GN=At2g32990 PE=2 SV=1
	c122077_g1	17.9066	4.16242	P24068	Ocs element-binding factor 1 OS=Zea mays GN=OBF1 PE=2 SV=2
	c42188_g1	17.9066	4.16242	Q7XPY2	Plasma membrane ATPase OS=Oryza sativa subsp. japonica GN=Os04g0656100 PE=2 SV=1
	c50347_g2	17.9066	4.16242
	c55745_g2	17.8179	4.15525	A2WSD3	Bidirectional sugar transporter SWEET6b OS=Oryza sativa subsp. indica GN=SWEET6B PE=3 SV=1
	c2928_g1	17.7793	4.15212
	c63105_g6	17.6335	4.14025	Q84JA6	Cellulose synthase A catalytic subunit 4 [UDP-forming] OS=Arabidopsis thaliana GN=CESA4 PE=1 SV=1
	c55468_g1	17.6155	4.13877	Q9SD84	PLASMODESMATA CALLOSE-BINDING PROTEIN 2 OS=Arabidopsis thaliana GN=PDCB2 PE=1 SV=1
	c111124_g1	17.5286	4.13164
	c41600_g1	17.4085	4.12172	Q9LMH6	Factor of DNA methylation 4 OS=Arabidopsis thaliana GN=FDM4 PE=4 SV=1
	c61918_g2	17.2314	4.10697
	c47363_g1	16.8979	4.07878
	c123072_g1	16.5562	4.0493	P13917	Basic 7S globulin OS=Glycine max GN=BG PE=1 SV=2
	c38862_g1	16.3822	4.03406
	c27148_g2	16.3104	4.02772
	c53142_g4	15.9341	3.99405	O23939	2-methylene-furan-3-one reductase OS=Fragaria vesca GN=EO PE=2 SV=2
	c74095_g1	15.881	3.98923	P49689	40S ribosomal protein S30 OS=Arabidopsis thaliana GN=RPS30A PE=3 SV=3
	c5161_g1	15.881	3.98923	Q9FJZ9	Peroxidase 72 OS=Arabidopsis thaliana GN=PER72 PE=1 SV=1
	c39640_g1	15.881	3.98923	O04200	Peroxisomal nicotinamide adenine dinucleotide carrier OS=Arabidopsis thaliana GN=PXN PE=1 SV=1
	c54984_g1	15.881	3.98923
	c114514_g1	15.881	3.98923	Q39131	Lamin-like protein OS=Arabidopsis thaliana GN=At5g15350 PE=1 SV=1
	c127998_g1	15.881	3.98923
	c57345_g1	15.7708	3.97918
	c28403_g1	15.7708	3.97918	Q8H0T4	E3 ubiquitin-protein ligase UPL2 OS=Arabidopsis thaliana GN=UPL2 PE=1 SV=3
	c16024_g1	15.7708	3.97918	Q9LQ32	Glucuronoxylan 4-O-methyltransferase 3 OS=Arabidopsis thaliana GN=GXM3 PE=1 SV=1
	c135617_g1	15.2379	3.92959	Q9M263	Germin-like protein subfamily 2 member 4 OS=Arabidopsis thaliana GN=GLP10 PE=2 SV=1
	c60193_g1	15.2057	3.92654	A0A151RNG8	Protein MCM10 isogeny OS=Cajanus cajan GN=KK1_034436 PE=4 SV=1
	c43250_g2	15.2057	3.92654	Q9FUY2	Transcriptional corepressor LEUNIG OS=Arabidopsis thaliana GN=LUG PE=1 SV=2
	c56612_g1	15.2057	3.92654	O80327	Thaumatin-like protein 1 OS=Pyrus pyrifolia GN=TL1 PE=1 SV=1
	c99466_g1	15.2057	3.92654
	c36869_g1	15.1353	3.91984	Q8VYJ2	AT-hook motif nuclear-localized protein 1 OS=Arabidopsis thaliana GN=AHL1 PE=1 SV=1
	c36487_g1	15.0977	3.91625	Q8LEJ6	Fasciclin-like arabinogalactan protein 11 OS=Arabidopsis thaliana GN=FLA11 PE=2 SV=2
	c52420_g1	15.0088	3.90774	Q2QQX6	Auxin response factor 24 OS=Oryza sativa subsp. japonica GN=ARF24 PE=2 SV=1
	c136070_g1	14.9519	3.90226	Q8L9J7	Bidirectional sugar transporter SWEET1 OS=Arabidopsis thaliana GN=SWEET1 PE=1 SV=1
	c109270_g1	14.7797	3.88555	P0CG89	Histone H4 OS=Glycine max PE=3 SV=1
	c34326_g1	14.6927	3.87703	F4IVI0	Mitotic checkpoint serine/threonine-protein kinase BUB1 OS=Arabidopsis thaliana GN=BUB1 PE=1 SV=1
	c59493_g1	14.6651	3.87431
	c80609_g1	14.5425	3.8622	P42774	G-box-binding factor 1 OS=Arabidopsis thaliana GN=GBF1 PE=2 SV=2
	c112051_g1	14.5305	3.86101	Q39222	Ras-related protein RABA1b OS=Arabidopsis thaliana GN=RABA1B PE=2 SV=1
	c64148_g1	14.5305	3.86101
	c78176_g1	14.4579	3.85379	Q42059	Endoglucanase 6 OS=Arabidopsis thaliana GN=At1g64390 PE=2 SV=2
	c56396_g1	13.9466	3.80184
	c49751_g3	13.906	3.79764	P0CG89	Histone H4 OS=Glycine max PE=3 SV=1
	c127571_g1	13.8553	3.79236	I1M332	Uncharacterized protein OS=Glycine max PE=4 SV=1
	c55629_g2	13.8553	3.79236
	c55251_g2	13.7237	3.77859	Q7XPY2	Plasma membrane ATPase OS=Oryza sativa subsp. japonica GN=Os04g0656100 PE=2 SV=1
	c310_g1	13.5749	3.76287	O23627	Glycine--tRNA ligase 1, mitochondrial OS=Arabidopsis thaliana GN=GLYRS-1 PE=2 SV=1
	c61325_g1	13.5749	3.76287
	c58334_g1	13.5698	3.76232	Q9LY84	GDSL esterase/lipase At5g14450 OS=Arabidopsis thaliana GN=At5g14450 PE=2 SV=1
	c23975_g1	13.5287	3.75795	Q9SYK9	UDP-glycosyltransferase 74E2 OS=Arabidopsis thaliana GN=UGT74E2 PE=1 SV=1
	c52156_g1	13.479	3.75265	P51074	Annexin-like protein RJ4 OS=Fragaria ananassa PE=2 SV=2
	c63628_g3	13.4513	3.74967	M0XM41	Uncharacterized protein OS=Hordeum vulgare var. distichum PE=4 SV=1
	c15984_g1	13.4406	3.74853	Q9LI74	Protein CHUP1, chloroplastic OS=Arabidopsis thaliana GN=CHUP1 PE=1 SV=1
	c102747_g1	13.3142	3.7349	Q9AR73	Hydroquinone glucosyltransferase OS=Rauvolfia serpentina GN=AS PE=1 SV=1
	c45841_g2	13.3142	3.7349	Q42699	5-methyltetrahydropteroyltriglutamate--homocysteine methyltransferase OS=Catharanthus roseus GN=METE PE=2 SV=1
	c41162_g2	13.1801	3.72029	Q9FZ96	Purine permease 1 OS=Arabidopsis thaliana GN=PUP1 PE=1 SV=1
	c96748_g1	13.1801	3.72029	Q41328	Pto-interacting protein 1 OS=Solanum lycopersicum GN=PTI1 PE=1 SV=2
	c47882_g2	13.1801	3.72029	P33083	Auxin-induced protein 6B OS=Glycine max PE=2 SV=1
	c3666_g1	13.1801	3.72029	Q9SZR9	ABC transporter G family member 9 OS=Arabidopsis thaliana GN=ABCG9 PE=3 SV=2
	c37143_g1	13.1801	3.72029	Q9SQZ0	Cationic amino acid transporter 7, chloroplastic OS=Arabidopsis thaliana GN=CAT7 PE=3 SV=1
	c54306_g1	12.9471	3.69456	Q9CAB7	Probable peroxygenase 4 OS=Arabidopsis thaliana GN=PXG4 PE=1 SV=1
	c58801_g1	12.9048	3.68984
	c120577_g1	12.8488	3.68356	Q9LHE3	Protein ASPARTIC PROTEASE IN GUARD CELL 2 OS=Arabidopsis thaliana GN=ASPG2 PE=2 SV=1
	c52156_g2	12.7864	3.67654	P51074	Annexin-like protein RJ4 OS=Fragaria ananassa PE=2 SV=2
	c110689_g1	12.7287	3.67002
	c52420_g5	12.7181	3.66881
	c56222_g1	12.6752	3.66394
	c2768_g1	12.6455	3.66055	Q9MA50	Pentatricopeptide repeat-containing protein At1g05750, chloroplastic OS=Arabidopsis thaliana GN=PDE247 PE=2 SV=1
	c52215_g2	12.5937	3.65463	P14009	14 kDa proline-rich protein DC2.15 OS=Daucus carota PE=2 SV=1
	c63213_g1	12.4821	3.64179	Q9C5Q8	Small RNA 2'-O-methyltransferase OS=Arabidopsis thaliana GN=HEN1 PE=1 SV=1
	c62049_g3	12.3469	3.62607	Q93Z79	Cytochrome P450 714A1 OS=Arabidopsis thaliana GN=CYP714A1 PE=2 SV=1
	c39271_g2	12.086	3.59526	Q9FG72	Oligopeptide transporter 1 OS=Arabidopsis thaliana GN=OPT1 PE=2 SV=1
	c134794_g1	12.0366	3.58935	Q9ZU70	Homeobox-leucine zipper protein ATHB-21 OS=Arabidopsis thaliana GN=ATHB-21 PE=2 SV=1
	c12118_g2	11.9964	3.58453	O24648	Gibberellin 3-beta-dioxygenase 1 OS=Pisum sativum GN=LE PE=1 SV=1
	c60311_g1	11.934	3.57701	Q39071	Cyclin-A2-1 OS=Arabidopsis thaliana GN=CYCA2-1 PE=2 SV=3
	c135116_g1	11.9284	3.57633	Q43872	Peroxidase 64 OS=Arabidopsis thaliana GN=PER64 PE=1 SV=1
	c31182_g1	11.9037	3.57334
	c49085_g2	11.8018	3.56093	Q9FFN2	Probable glycosyltransferase At5g03795 OS=Arabidopsis thaliana GN=At5g03795 PE=3 SV=2
	c92549_g1	11.7971	3.56036	Q93ZA0	Probable chlorophyll(ide) b reductase NYC1, chloroplastic OS=Arabidopsis thaliana GN=NYC1 PE=1 SV=1
	c62804_g6	11.7482	3.55437
	c36903_g1	11.6975	3.54812	Q9AT54	Scopoletin glucosyltransferase OS=Nicotiana tabacum GN=TOGT1 PE=1 SV=1
	c62152_g1	11.6765	3.54554	A0A151SEN3	RNA polymerase-associated protein RTF1 isogeny OS=Cajanus cajan GN=KK1_024870 PE=4 SV=1
	c51476_g1	11.5727	3.53265	Q9C5Y4	Structural maintenance of chromosomes protein 2-1 OS=Arabidopsis thaliana GN=SMC2-1 PE=2 SV=2
	c50934_g1	11.5727	3.53265
	c66738_g1	11.5207	3.52616	Q9FG13	Probable carboxylesterase 15 OS=Arabidopsis thaliana GN=CXE15 PE=2 SV=1
	c61512_g6	11.4927	3.52264	Q6YU51	Probable 1-deoxy-D-xylulose-5-phosphate synthase 2, chloroplastic OS=Oryza sativa subsp. japonica GN=Os07g0190000 PE=2 SV=1
	c49978_g1	11.4927	3.52264	Q8GXG1	Probable isoaspartyl peptidase/L-asparaginase 2 OS=Arabidopsis thaliana GN=At3g16150 PE=2 SV=2
	c63445_g2	11.4263	3.51429	Q9FX31	Homeobox-leucine zipper protein HDG11 OS=Arabidopsis thaliana GN=HDG11 PE=1 SV=1
	c23975_g2	11.3981	3.51073	Q9SKC1	UDP-glycosyltransferase 74C1 OS=Arabidopsis thaliana GN=UGT74C1 PE=2 SV=1
	c40794_g1	11.3733	3.50758	Q949P1	Abscisic acid 8'-hydroxylase 1 OS=Arabidopsis thaliana GN=CYP707A1 PE=2 SV=1
	c28519_g1	11.3162	3.50031	P54970	IAA-amino acid hydrolase ILR1-like 2 OS=Arabidopsis thaliana GN=ILL2 PE=1 SV=2
	c83287_g1	11.2671	3.49405	Q43062	Pectinesterase/pectinesterase inhibitor PPE8B OS=Prunus persica PE=2 SV=1
	c58650_g2	11.0224	3.46237	Q8BV79	TPR and ankyrin repeat-containing protein 1 OS=Mus musculus GN=Trank1 PE=2 SV=3
	c56915_g1	10.8577	3.44065	Q9ZQC5	Interactor of constitutive active ROPs 2, chloroplastic OS=Arabidopsis thaliana GN=ICR2 PE=1 SV=1
	c109115_g1	10.8577	3.44065
	c35354_g1	10.8382	3.43805
	c54004_g1	10.8305	3.43703	P0C2F6	Putative ribonuclease H protein At1g65750 OS=Arabidopsis thaliana GN=At1g65750 PE=3 SV=1
	c52806_g3	10.7286	3.42339	Q9M0X9	4-coumarate--CoA ligase-like 7 OS=Arabidopsis thaliana GN=4CLL7 PE=1 SV=1
	c58231_g1	10.6289	3.40993	Q9SSE9	Lysine-specific demethylase JMJ25 OS=Arabidopsis thaliana GN=JMJ25 PE=1 SV=1
	c92206_g1	10.5699	3.40189	P27480	Linoleate 9S-lipoxygenase 1 OS=Phaseolus vulgaris GN=LOXA PE=1 SV=1
	c85967_g1	10.5366	3.39734
	c65737_g1	10.4483	3.38519
	c47314_g1	10.4348	3.38334	Q94G86	Glucan endo-1,3-beta-D-glucosidase OS=Olea europaea GN=OLE9 PE=1 SV=1
	c15375_g1	10.4225	3.38163
	c21334_g2	10.4192	3.38117	B3GS44	GPI-anchored protein LORELEI OS=Arabidopsis thaliana GN=LRE PE=2 SV=1
	c45252_g1	10.3954	3.37787	P38417	Linoleate 9S-lipoxygenase-4 OS=Glycine max GN=LOX1.5 PE=1 SV=1
	c55392_g1	10.2696	3.36031	Q94AI4	Methyltransferase-like protein 1 OS=Arabidopsis thaliana GN=EMB1691 PE=2 SV=1
	c62816_g1	10.1982	3.35025	Q9FLP0	65-kDa microtubule-associated protein 1 OS=Arabidopsis thaliana GN=MAP65-1 PE=1 SV=1
	c92210_g1	10.1934	3.34956	P52578	Isoflavone reductase homolog OS=Solanum tuberosum PE=2 SV=1
	c56730_g2	10.1411	3.34214	A0A151SJX7	ATPase family AAA domain-containing protein 5 OS=Cajanus cajan GN=KK1_001360 PE=4 SV=1
	c19501_g1	10.1411	3.34214	Q8H0T4	E3 ubiquitin-protein ligase UPL2 OS=Arabidopsis thaliana GN=UPL2 PE=1 SV=3
	c45797_g1	10.1411	3.34214
	c40950_g1	10.1411	3.34214
	c33973_g2	10.0641	3.33115	Q9ZNS4	Pathogenesis-related protein 1 OS=Arabidopsis thaliana GN=PRB1 PE=2 SV=1
	c57345_g2	10.0471	3.3287
	c61039_g5	10.0389	3.32752
	c13219_g1	10.0389	3.32752	Q6NMK1	Glucuronoxylan 4-O-methyltransferase 1 OS=Arabidopsis thaliana GN=GXM1 PE=1 SV=1
	c117071_g1	10.0389	3.32752
	c49763_g2	9.99506	3.32121	Q9SQ80	Gibberellin 2-beta-dioxygenase 1 OS=Pisum sativum GN=GA2OX1 PE=1 SV=1
	c49601_g1	9.96917	3.31747	Q42381	Probable N-acetyltransferase HLS1 OS=Arabidopsis thaliana GN=HLS1 PE=1 SV=1
	c23951_g1	9.96324	3.31662	Q9C9H7	Receptor-like protein 12 OS=Arabidopsis thaliana GN=RLP12 PE=2 SV=2
	c59504_g2	9.84728	3.29973	P37829	Fructokinase OS=Solanum tuberosum PE=1 SV=1
	c95718_g1	9.83677	3.29818
	c45029_g2	9.7803	3.28988
	c59122_g2	9.76669	3.28787	I1LIN2	Uncharacterized protein OS=Glycine max GN=GLYMA_11G096400 PE=4 SV=1
	c59970_g2	9.7401	3.28394	Q9LR47	Type I inositol 1,4,5-trisphosphate 5-phosphatase CVP2 OS=Arabidopsis thaliana GN=CVP2 PE=1 SV=2
	c4952_g1	9.69768	3.27764	E1U332	Isoflavone reductase-like protein OS=Olea europaea PE=1 SV=1
	c63287_g3	9.57227	3.25886	Q5W6B9	Protein HAPLESS 2-A OS=Oryza sativa subsp. japonica GN=HAP2A PE=2 SV=1
	c123178_g1	9.5535	3.25603
	c62911_g6	9.51102	3.2496
	c51626_g1	9.51102	3.2496	Q9SHE9	LOB domain-containing protein 4 OS=Arabidopsis thaliana GN=LBD4 PE=2 SV=1
	c56003_g1	9.33606	3.22281
	c45600_g1	9.33606	3.22281
	c47663_g2	9.30601	3.21816
	c44096_g2	9.30601	3.21816
	c121863_g1	9.30601	3.21816	Q41001	Blue copper protein OS=Pisum sativum PE=2 SV=1
	c52164_g1	9.30601	3.21816	O23628	Histone H2A variant 1 OS=Arabidopsis thaliana GN=H2AV PE=1 SV=1
	c44173_g1	9.28195	3.21443	Q9FMF5	Root phototropism protein 3 OS=Arabidopsis thaliana GN=RPT3 PE=1 SV=2
	c56087_g1	9.25973	3.21097	Q9FN30	Probable aminotransferase TAT2 OS=Arabidopsis thaliana GN=At5g53970 PE=2 SV=1
	c87870_g1	9.23878	3.2077	A2XAZ3	Alcohol dehydrogenase class-3 OS=Oryza sativa subsp. indica GN=ADHIII PE=3 SV=1
	c37508_g2	9.19702	3.20117	Q9SIA1	MATE efflux family protein 8 OS=Arabidopsis thaliana GN=DTXL4 PE=3 SV=2
	c59817_g1	9.17865	3.19828	Q9LZ72	3-ketoacyl-CoA synthase 21 OS=Arabidopsis thaliana GN=KCS21 PE=2 SV=1
	c136409_g1	9.14698	3.1933	Q9FXA3	Transcription factor bHLH95 OS=Arabidopsis thaliana GN=BHLH95 PE=2 SV=2
	c52738_g2	9.13434	3.1913	Q9LFT0	Protein trichome birefringence-like 19 OS=Arabidopsis thaliana GN=TBL19 PE=3 SV=1
	c61139_g2	9.10842	3.1872	A0A151QWC6	Retrovirus-related Pol polyprotein from transposon 297 family (Fragment) OS=Cajanus cajan GN=KK1_046429 PE=4 SV=1
	c108360_g1	9.10842	3.1872	O64733	UDP-glycosyltransferase 87A2 OS=Arabidopsis thaliana GN=UGT87A2 PE=1 SV=1
	c23644_g1	9.03071	3.17484
	c49454_g4	8.99613	3.1693	B9DHT4	ARM REPEAT PROTEIN INTERACTING WITH ABF2 OS=Arabidopsis thaliana GN=ARIA PE=1 SV=2
	c54910_g1	8.96595	3.16446	Q9LJX5	Probable mitochondrial adenine nucleotide transporter BTL1 OS=Arabidopsis thaliana GN=At3g20240 PE=2 SV=1
	c60920_g3	8.93204	3.15899	Q5H7P5	Mannosylglycoprotein endo-beta-mannosidase OS=Lilium longiflorum GN=EBM PE=1 SV=4
	c16035_g1	8.9207	3.15716	O80434	Laccase-4 OS=Arabidopsis thaliana GN=IRX12 PE=2 SV=2
	c54938_g1	8.89258	3.1526	J9U5U9	Probable strigolactone esterase DAD2 OS=Petunia hybrida GN=DAD2 PE=1 SV=1
	c47292_g1	8.83914	3.14391
	c137064_g1	8.83535	3.14329	O80786	DNA replication licensing factor MCM5 OS=Arabidopsis thaliana GN=MCM5 PE=1 SV=1
	c31339_g1	8.82894	3.14224	I1KND7	Uncharacterized protein OS=Glycine max GN=GLYMA_07G261200 PE=4 SV=2
	c14497_g1	8.8238	3.1414	A1L4Y2	Alcohol dehydrogenase-like 3 OS=Arabidopsis thaliana GN=At1g32780 PE=2 SV=1
	c45193_g1	8.71022	3.12271	Q9T041	Microtubule-associated protein TORTIFOLIA1 OS=Arabidopsis thaliana GN=TOR1 PE=1 SV=2
	c15940_g1	8.65387	3.11335	Q43092	Granule-bound starch synthase 1, chloroplastic/amyloplastic OS=Pisum sativum PE=1 SV=1
	c130775_g1	8.59473	3.10345
	c50535_g1	8.59473	3.10345	Q39189	DEAD-box ATP-dependent RNA helicase 7 OS=Arabidopsis thaliana GN=RH7 PE=1 SV=2
	c59340_g3	8.54081	3.09437
	c137299_g1	8.34771	3.06138	Q9LS40	Protein ASPARTIC PROTEASE IN GUARD CELL 1 OS=Arabidopsis thaliana GN=ASPG1 PE=1 SV=1
	c42841_g1	8.34202	3.0604	O48653	DNA polymerase alpha catalytic subunit OS=Oryza sativa subsp. japonica GN=Os01g0868300 PE=2 SV=2
	c15780_g1	8.33689	3.05951	O22822	UDP-glycosyltransferase 74F2 OS=Arabidopsis thaliana GN=UGT74F2 PE=1 SV=1
	c55358_g1	8.24089	3.0428	P10978	Retrovirus-related Pol polyprotein from transposon TNT 1-94 OS=Nicotiana tabacum PE=2 SV=1
	c42326_g1	8.13658	3.02442	O48946	Cellulose synthase A catalytic subunit 1 [UDP-forming] OS=Arabidopsis thaliana GN=CESA1 PE=1 SV=1
	c59685_g3	8.13658	3.02442
	c49291_g1	8.13658	3.02442	Q3E9A4	Probable glycosyltransferase At5g20260 OS=Arabidopsis thaliana GN=At5g20260 PE=3 SV=3
	c63757_g7	8.13658	3.02442
	c50711_g1	8.08141	3.01461
	c63448_g1	8.07184	3.0129	O50008	5-methyltetrahydropteroyltriglutamate--homocysteine methyltransferase 1 OS=Arabidopsis thaliana GN=MS1 PE=1 SV=1
	c135247_g1	8.03382	3.00609	Q2QNM1	DNA replication licensing factor MCM7 OS=Oryza sativa subsp. japonica GN=MCM7 PE=2 SV=1
	c64299_g1	8.02634	3.00474	P09607	Pectinesterase 2.1 OS=Solanum lycopersicum GN=PME2.1 PE=2 SV=2
	c85072_g1	7.9881	2.99785
	c29258_g1	7.97918	2.99624	Q9S7M9	Transmembrane emp24 domain-containing protein p24beta2 OS=Arabidopsis thaliana GN=At3g07680 PE=1 SV=1
	c121010_g1	7.96844	2.9943	P25795	Aldehyde dehydrogenase family 7 member A1 OS=Pisum sativum PE=1 SV=3
	c56206_g1	7.93391	2.98803	O04251	BRCT domain-containing protein At4g02110 OS=Arabidopsis thaliana GN=At4g02110 PE=3 SV=3
	c83592_g1	7.88273	2.97869	P20075	Embryonic protein DC-8 OS=Daucus carota PE=3 SV=1
	c55690_g4	7.85199	2.97306
	c62015_g5	7.81754	2.96672
	c34000_g2	7.79693	2.96291
	c81172_g1	7.79433	2.96243
	c54277_g2	7.79433	2.96243	B6VJS4	Trans-resveratrol di-O-methyltransferase OS=Vitis vinifera GN=ROMT PE=1 SV=2
	c70262_g1	7.7285	2.95019	P27480	Linoleate 9S-lipoxygenase 1 OS=Phaseolus vulgaris GN=LOXA PE=1 SV=1
	c56096_g2	7.68791	2.94259	Q9LX29	Serine/threonine-protein kinase-like protein ACR4 OS=Arabidopsis thaliana GN=ACR4 PE=1 SV=1
	c57255_g2	7.64437	2.9344	Q9SJ52	Protein YLS9 OS=Arabidopsis thaliana GN=YLS9 PE=2 SV=1
	c39100_g2	7.64303	2.93415	Q0WRX3	Serine carboxypeptidase-like 40 OS=Arabidopsis thaliana GN=SCPL40 PE=2 SV=2
	c57328_g1	7.60661	2.92725	Q9XGW1	Protein argonaute 10 OS=Arabidopsis thaliana GN=AGO10 PE=2 SV=1
	c6521_g1	7.59202	2.92448	Q9LZV3	Mannan endo-1,4-beta-mannosidase 6 OS=Arabidopsis thaliana GN=MAN6 PE=2 SV=1
	c53418_g1	7.57837	2.92189	P68428	Histone H3.2 OS=Triticum aestivum PE=1 SV=2
	c62886_g7	7.52011	2.91075	Q9ZTX9	Auxin response factor 4 OS=Arabidopsis thaliana GN=ARF4 PE=1 SV=1
	c63647_g2	7.43705	2.89473	P10978	Retrovirus-related Pol polyprotein from transposon TNT 1-94 OS=Nicotiana tabacum PE=2 SV=1
	c57972_g1	7.41393	2.89024	Q7XZQ7	Flavanone 3-dioxygenase OS=Petroselinum crispum GN=FHT PE=1 SV=1
	c27254_g1	7.39772	2.88708
	c75348_g1	7.34163	2.8761	Q8L7A4	Probable ADP-ribosylation factor GTPase-activating protein AGD11 OS=Arabidopsis thaliana GN=AGD11 PE=2 SV=1
	c57355_g1	7.24424	2.85683	Q9XIE6	Phospholipid-transporting ATPase 3 OS=Arabidopsis thaliana GN=ALA3 PE=1 SV=2
	c62989_g2	7.17608	2.8432	P10978	Retrovirus-related Pol polyprotein from transposon TNT 1-94 OS=Nicotiana tabacum PE=2 SV=1
	c44765_g1	7.1063	2.8291	Q07761	60S ribosomal protein L23a OS=Nicotiana tabacum GN=RPL23A PE=2 SV=1
	c46180_g2	7.09794	2.8274	C6SZ04	CASP-like protein 2C1 OS=Glycine max PE=2 SV=1
	c54118_g2	7.07976	2.8237	Q19KC1	Aquaporin NIP2-1 OS=Zea mays GN=NIP2-1 PE=2 SV=2
	c60856_g4	7.00942	2.80929
	c29626_g1	6.97557	2.80231
	c16756_g1	6.95089	2.7972
	c36775_g1	6.94293	2.79555	Q9LT96	Probable leucine-rich repeat receptor-like protein kinase At5g49770 OS=Arabidopsis thaliana GN=At5g49770 PE=2 SV=1
	c134488_g1	6.92826	2.79249
	c94242_g1	6.90909	2.7885	Q9S7I8	Cell division cycle 20.2, cofactor of APC complex OS=Arabidopsis thaliana GN=CDC20-2 PE=1 SV=1
	c60329_g2	6.85986	2.77818	Q6PQQ3	AP2-like ethylene-responsive transcription factor AIL5 OS=Arabidopsis thaliana GN=AIL5 PE=2 SV=2
	c62886_g2	6.82992	2.77187	Q9ZTX9	Auxin response factor 4 OS=Arabidopsis thaliana GN=ARF4 PE=1 SV=1
	c141168_g1	6.8238	2.77057	Q38922	Ras-related protein RABB1b OS=Arabidopsis thaliana GN=RABB1B PE=2 SV=1
	c99691_g1	6.81577	2.76888
	c81851_g1	6.79943	2.76541	P35016	Endoplasmin homolog OS=Catharanthus roseus GN=HSP90 PE=2 SV=1
	c61495_g1	6.79943	2.76541	Q944A9	Novel plant SNARE 11 OS=Arabidopsis thaliana GN=NPSN11 PE=1 SV=2
	c60240_g1	6.77832	2.76093
	c50270_g1	6.70338	2.74489	Q9LI74	Protein CHUP1, chloroplastic OS=Arabidopsis thaliana GN=CHUP1 PE=1 SV=1
	c51266_g2	6.66851	2.73736
	c58532_g3	6.64528	2.73233	P0CG89	Histone H4 OS=Glycine max PE=3 SV=1
	c61901_g7	6.63515	2.73013
	c49098_g1	6.56899	2.71567	Q945B6	Probable 2-oxoglutarate-dependent dioxygenase AOP1.2 OS=Arabidopsis thaliana GN=AOP1.2 PE=2 SV=1
	c18184_g1	6.56891	2.71565
	c63284_g7	6.40333	2.67882	Q94BT9	Copper transport protein ATX1 OS=Arabidopsis thaliana GN=ATX1 PE=1 SV=1
	c43486_g2	6.32967	2.66213	Q9AR07	Jasmonate O-methyltransferase OS=Arabidopsis thaliana GN=JMT PE=1 SV=3
	c47368_g1	6.25129	2.64415
	c61772_g5	6.19758	2.6317	C0LGP9	Probable leucine-rich repeat receptor-like protein kinase IMK3 OS=Arabidopsis thaliana GN=IMK3 PE=1 SV=1
	c48894_g1	6.16742	2.62467	Q9SA69	BTB/POZ domain-containing protein At1g03010 OS=Arabidopsis thaliana GN=At1g03010 PE=2 SV=1
	c16392_g1	6.00373	2.58586	Q9LY84	GDSL esterase/lipase At5g14450 OS=Arabidopsis thaliana GN=At5g14450 PE=2 SV=1
	c59352_g2	5.99215	2.58307	D2WL32	1,4-alpha-glucan-branching enzyme 3, chloroplastic/amyloplastic OS=Arabidopsis thaliana GN=SBE3 PE=1 SV=1
	c30938_g1	0.164543	-2.60346	O65351	Subtilisin-like protease SBT1.7 OS=Arabidopsis thaliana GN=SBT1.7 PE=1 SV=1
	c81897_g1	0.164526	-2.60361
	c60417_g2	0.162969	-2.61733	Q9FXA4	U-box domain-containing protein 26 OS=Arabidopsis thaliana GN=PUB26 PE=2 SV=1
	c64001_g1	0.162907	-2.61788	P93331	Nodulin-1 OS=Medicago truncatula GN=N1 PE=2 SV=1
	c62884_g9	0.161413	-2.63117	Q8H1D6	Receptor-like cytosolic serine/threonine-protein kinase RBK1 OS=Arabidopsis thaliana GN=RBK1 PE=1 SV=1
	c61499_g2	0.160876	-2.63598	P0CH30	E3 ubiquitin-protein ligase RING1 OS=Gossypium hirsutum GN=RING1 PE=1 SV=1
	c134648_g1	0.160736	-2.63723	Q8RXL8	Uncharacterized membrane protein At1g06890 OS=Arabidopsis thaliana GN=At1g06890 PE=1 SV=1
	c19233_g1	0.160688	-2.63766
	c84944_g1	0.160379	-2.64044	Q41951	Aquaporin TIP2-1 OS=Arabidopsis thaliana GN=TIP2-1 PE=1 SV=2
	c38791_g1	0.159847	-2.64524	Q93VG8	DeSI-like protein At4g17486 OS=Arabidopsis thaliana GN=At4g17486 PE=2 SV=1
	c60365_g3	0.159832	-2.64537
	c62096_g1	0.159423	-2.64907
	c61444_g3	0.159084	-2.65214	Q93V56	Soluble inorganic pyrophosphatase 1 OS=Arabidopsis thaliana GN=PPA1 PE=1 SV=1
	c123449_g1	0.158369	-2.65864	Q01861	Phenylalanine ammonia-lyase 1 OS=Pisum sativum GN=PAL1 PE=2 SV=1
	c41233_g1	0.158062	-2.66144	Q03460	Glutamate synthase [NADH], amyloplastic OS=Medicago sativa PE=1 SV=1
	c60138_g1	0.157482	-2.66674
	c10179_g1	0.156461	-2.67613	Q9LZ06	Glutathione S-transferase L3 OS=Arabidopsis thaliana GN=GSTL3 PE=2 SV=1
	c30841_g1	0.156342	-2.67722	Q9FZ62	Inorganic pyrophosphatase 2 OS=Arabidopsis thaliana GN=At1g17710 PE=2 SV=1
	c60339_g11	0.156303	-2.67758
	c54183_g1	0.156106	-2.6794	Q9CAD5	Mitogen-activated protein kinase kinase kinase YODA OS=Arabidopsis thaliana GN=YDA PE=1 SV=1
	c61860_g1	0.155737	-2.68282
	c121308_g1	0.155706	-2.6831	P17407	21 kDa protein OS=Daucus carota PE=2 SV=1
	c45495_g1	0.155304	-2.68684	Q8GX29	F-box/kelch-repeat protein SKIP25 OS=Arabidopsis thaliana GN=SKIP25 PE=1 SV=1
	c50188_g1	0.154989	-2.68976	F4INW9	Probable myosin-binding protein 4 OS=Arabidopsis thaliana GN=MYOB4 PE=3 SV=1
	c62949_g1	0.154821	-2.69133
	c60287_g1	0.154361	-2.69562	Q5JK32	Potassium transporter 5 OS=Oryza sativa subsp. japonica GN=HAK5 PE=2 SV=2
	c28525_g1	0.154361	-2.69562	A6BM07	Isoflavone 7-O-glucosyltransferase 1 OS=Glycine max GN=GmIF7GT1 PE=1 SV=1
	c19510_g1	0.153784	-2.70102	Q39529	Agglutinin-2 OS=Cladrastis kentukea PE=1 SV=1
	c63478_g4	0.153755	-2.7013	Q02909	Phosphoenolpyruvate carboxylase, housekeeping isozyme OS=Glycine max GN=PPC16 PE=1 SV=1
	c93908_g1	0.153735	-2.70148	P29136	Metalloendoproteinase 1 OS=Glycine max PE=1 SV=2
	c60313_g3	0.153113	-2.70733	Q9MB95	1-aminocyclopropane-1-carboxylate synthase 1 OS=Prunus mume GN=ACS1 PE=2 SV=1
	c45940_g1	0.15294	-2.70896
	c9615_g1	0.152606	-2.71211	Q5Z8T3	Probable inositol oxygenase OS=Oryza sativa subsp. japonica GN=Os06g0561000 PE=2 SV=1
	c56445_g2	0.152547	-2.71267
	c122353_g1	0.15243	-2.71378	Q850K7	Expansin-like B1 OS=Oryza sativa subsp. japonica GN=EXLB1 PE=2 SV=2
	c35958_g1	0.15171	-2.72061
	c77492_g1	0.151505	-2.72256
	c42579_g1	0.151416	-2.72341
	c58986_g1	0.151339	-2.72415	P31531	1-aminocyclopropane-1-carboxylate synthase OS=Glycine max GN=ACS1 PE=2 SV=1
	c94313_g1	0.150888	-2.72845
	c100918_g1	0.150827	-2.72904	Q9C9X3	Annexin D5 OS=Arabidopsis thaliana GN=ANN5 PE=2 SV=2
	c52678_g1	0.150827	-2.72904
	c53596_g1	0.150788	-2.72941	Q7XEY9	SPX domain-containing protein 3 OS=Oryza sativa subsp. japonica GN=SPX3 PE=2 SV=1
	c115011_g1	0.150629	-2.73093	Q8VYW2	Inactive beta-amylase 9 OS=Arabidopsis thaliana GN=BAM9 PE=2 SV=1
	c42836_g1	0.150584	-2.73136	Q67YC0	Inorganic pyrophosphatase 1 OS=Arabidopsis thaliana GN=PS2 PE=1 SV=1
	c49569_g2	0.149922	-2.73772	Q9SJ52	Protein YLS9 OS=Arabidopsis thaliana GN=YLS9 PE=2 SV=1
	c62770_g1	0.149783	-2.73905	P48977	Alcohol dehydrogenase OS=Malus domestica GN=ADH PE=2 SV=1
	c53512_g1	0.149264	-2.74406	A0A151T0I5	Monoacylglycerol lipase ABHD6 OS=Cajanus cajan GN=KK1_022970 PE=4 SV=1
	c81444_g1	0.149204	-2.74464	A2WY46	Protein terminal ear1 homolog OS=Oryza sativa subsp. indica GN=PLA2 PE=2 SV=1
	c5952_g1	0.149057	-2.74606
	c2698_g1	0.14889	-2.74768	V7BAZ9	Uncharacterized protein OS=Phaseolus vulgaris GN=PHAVU_007G014300g PE=4 SV=1
	c24237_g2	0.148349	-2.75293	Q41001	Blue copper protein OS=Pisum sativum PE=2 SV=1
	c36740_g3	0.14817	-2.75467
	c59450_g1	0.148116	-2.7552	Q3EBF7	Delta(8)-fatty-acid desaturase 2 OS=Arabidopsis thaliana GN=SLD2 PE=1 SV=1
	c64374_g1	0.147967	-2.75665
	c47756_g2	0.147652	-2.75972	Q8H115	NAC domain-containing protein 102 OS=Arabidopsis thaliana GN=NAC102 PE=1 SV=1
	c136856_g1	0.147602	-2.76022	Q8L5Z1	GDSL esterase/lipase At1g33811 OS=Arabidopsis thaliana GN=At1g33811 PE=2 SV=1
	c47658_g2	0.147429	-2.76191
	c62281_g4	0.147294	-2.76323	Q9FE59	Sucrose transport protein SUC4 OS=Arabidopsis thaliana GN=SUC4 PE=1 SV=2
	c60580_g5	0.147269	-2.76347	Q2HV09	Peptidase C1A, papain; Somatotropin hormone; Peptidase C1, propeptide OS=Medicago truncatula GN=MtrDRAFT_AC149038g3v2 PE=3 SV=1
	c79065_g1	0.147176	-2.76439	P30181	DNA topoisomerase 1 OS=Arabidopsis thaliana GN=TOP1 PE=1 SV=1
	c61555_g2	0.14678	-2.76827	Q96328	Phosphoinositide phosphatase SAC8 OS=Arabidopsis thaliana GN=SAC8 PE=2 SV=1
	c54482_g2	0.14678	-2.76827
	c68144_g1	0.146431	-2.77171
	c63135_g5	0.146293	-2.77307	P43298	Probable receptor protein kinase TMK1 OS=Arabidopsis thaliana GN=TMK1 PE=1 SV=1
	c33756_g1	0.145651	-2.77941
	c24685_g1	0.144553	-2.79033
	c63899_g1	0.144454	-2.79132	Q9FH99	F-box protein At5g67140 OS=Arabidopsis thaliana GN=At5g67140 PE=2 SV=1
	c54510_g2	0.144255	-2.79331	P93541	Glutamate dehydrogenase OS=Solanum lycopersicum GN=GDH1 PE=2 SV=1
	c52939_g1	0.144158	-2.79428
	c8385_g1	0.143832	-2.79754	D7SMF8	uncharacterized protein OS=Vitis vinifera GN=VIT_01s0137g00230 PE=4 SV=1
	c64357_g1	0.143665	-2.79922	P31169	Stress-induced protein KIN2 OS=Arabidopsis thaliana GN=KIN2 PE=2 SV=1
	c45320_g1	0.143057	-2.80534
	c37197_g1	0.142999	-2.80592	Q9C9X3	Annexin D5 OS=Arabidopsis thaliana GN=ANN5 PE=2 SV=2
	c69518_g1	0.142915	-2.80677
	c135799_g1	0.142725	-2.80869
	c23572_g1	0.142369	-2.81229
	c18833_g1	0.141683	-2.81926	O80339	Ethylene-responsive transcription factor 3 OS=Arabidopsis thaliana GN=ERF3 PE=1 SV=1
	c120434_g1	0.140425	-2.83213
	c49204_g2	0.140396	-2.83242	O80623	Probable receptor-like protein kinase At2g39360 OS=Arabidopsis thaliana GN=At2g39360 PE=2 SV=1
	c52677_g1	0.140359	-2.83281	Q9S7A0	Probable glutamate dehydrogenase 3 OS=Arabidopsis thaliana GN=GSH3 PE=3 SV=1
	c63099_g14	0.139628	-2.84034	I1LEF9	Uncharacterized protein OS=Glycine max GN=GLYMA_10G258700 PE=3 SV=1
	c16023_g1	0.139453	-2.84215
	c63288_g3	0.139323	-2.84349	Q9SGW8	Phosphatidylinositol 4-kinase gamma 2 OS=Arabidopsis thaliana GN=PI4KG2 PE=1 SV=2
	c120815_g1	0.139315	-2.84358
	c55743_g4	0.139305	-2.84369	Q9T0J1	Cysteine-rich receptor-like protein kinase 26 OS=Arabidopsis thaliana GN=CRK26 PE=2 SV=1
	c125077_g1	0.138552	-2.8515	Q96502	Zinc finger protein CONSTANS-LIKE 2 OS=Arabidopsis thaliana GN=COL2 PE=1 SV=1
	c64976_g1	0.138505	-2.85199	Q8H074	Probable inorganic phosphate transporter 1-12 OS=Oryza sativa subsp. japonica GN=PHT1-12 PE=2 SV=1
	c57393_g3	0.138479	-2.85226	Q7XBH4	Myb-related protein Myb4 OS=Oryza sativa subsp. japonica GN=MYB4 PE=2 SV=2
	c51606_g1	0.138445	-2.85261	B8XCH5	Protein QUIRKY OS=Arabidopsis thaliana GN=QKY PE=2 SV=1
	c32533_g1	0.138445	-2.85261
	c8323_g1	0.138445	-2.85261	Q9SSE9	Lysine-specific demethylase JMJ25 OS=Arabidopsis thaliana GN=JMJ25 PE=1 SV=1
	c50522_g1	0.138323	-2.85389	Q9SE42	Ribulose-phosphate 3-epimerase, cytoplasmic isoform OS=Oryza sativa subsp. japonica GN=Os09g0505700 PE=1 SV=1
	c116057_g1	0.138323	-2.85389	Q8LBH4	SPX domain-containing protein 1 OS=Arabidopsis thaliana GN=SPX1 PE=2 SV=2
	c63459_g5	0.138149	-2.8557	P30170	Actin-85C (Fragment) OS=Solanum tuberosum GN=AC85C PE=3 SV=1
	c137204_g1	0.137601	-2.86144
	c106520_g1	0.13748	-2.86271	Q8GYF4	Probable inorganic phosphate transporter 1-5 OS=Arabidopsis thaliana GN=PHT1-5 PE=2 SV=2
	c16039_g1	0.137224	-2.8654	Q9LIK7	Putative calcium-transporting ATPase 13, plasma membrane-type OS=Arabidopsis thaliana GN=ACA13 PE=3 SV=1
	c107017_g1	0.13694	-2.86839	Q9S7I0	tRNA(adenine(34)) deaminase, chloroplastic OS=Arabidopsis thaliana GN=TADA E=1SV=1
	c76570_g1	0.136873	-2.86909
	c37533_g1	0.136489	-2.87314
	c62757_g3	0.13645	-2.87356	Q9LE73	Nudix hydrolase 4 OS=Arabidopsis thaliana GN=NUDT4 PE=1 SV=1
	c59535_g3	0.136099	-2.87727	Q9FG14	Myosin-binding protein 7 OS=Arabidopsis thaliana GN=MYOB7 PE=1 SV=1
	c81001_g1	0.136085	-2.87741	O80337	Ethylene-responsive transcription factor 1A OS=Arabidopsis thaliana GN=ERF1A PE=1 SV=2
	c62157_g1	0.136085	-2.87741	F4I037	Protein trichome berefringence-like 7 OS=Arabidopsis thaliana GN=TBL7 PE=3 SV=1
	c47701_g1	0.13596	-2.87874	Q9T074	Phosphoenolpyruvate carboxykinase [ATP] OS=Arabidopsis thaliana GN=PCKA PE=1 SV=1
	c54185_g1	0.135778	-2.88067
	c108886_g1	0.135101	-2.88789
	c101567_g1	0.134887	-2.89018
	c47756_g1	0.134879	-2.89026	Q39013	NAC domain-containing protein 2 OS=Arabidopsis thaliana GN=NAC002 PE=2 SV=2
	c56514_g2	0.134775	-2.89137	Q96303	Inorganic phosphate transporter 1-4 OS=Arabidopsis thaliana GN=PHT1-4 PE=1 SV=1
	c37118_g1	0.134633	-2.8929	P29162	L-ascorbate oxidase homolog OS=Nicotiana tabacum PE=1 SV=1
	c62844_g3	0.134633	-2.8929	H1A988	11-oxo-beta-amyrin 30-oxidase OS=Glycyrrhiza uralensis GN=CYP72A154 PE=1 SV=1
	c59673_g3	0.134179	-2.89777
	c55912_g3	0.134165	-2.89792	Q8VWQ5	Probable WRKY transcription factor 50 OS=Arabidopsis thaliana GN=WRKY50 PE=2 SV=1
	c93184_g1	0.134165	-2.89792
	c50472_g4	0.134165	-2.89792	C0LGU0	Pollen receptor-like kinase 1 OS=Arabidopsis thaliana GN=PRK1 PE=1 SV=1
	c140863_g1	0.134157	-2.89801
	c41141_g1	0.13377	-2.90217
	c33532_g1	0.133495	-2.90514	Q9FLJ2	NAC domain-containing protein 100 OS=Arabidopsis thaliana GN=NAC100 PE=2 SV=1
	c83806_g1	0.133495	-2.90514
	c69985_g1	0.132554	-2.91535
	c41193_g2	0.132329	-2.9178	Q9SDN0	Chaperone protein dnaJ 20, chloroplastic OS=Arabidopsis thaliana GN=ATJ20 PE=1 SV=2
	c11712_g1	0.132082	-2.9205	Q9SA05	Potassium transporter 10 OS=Arabidopsis thaliana GN=POT10 PE=2 SV=2
	c61125_g2	0.13203	-2.92106	Q3EBF7	Delta(8)-fatty-acid desaturase 2 OS=Arabidopsis thaliana GN=SLD2 PE=1 SV=1
	c65974_g1	0.131562	-2.92619
	c54944_g1	0.131353	-2.92848	Q8LPN7	E3 ubiquitin-protein ligase RING1-like OS=Arabidopsis thaliana GN=At3g19950 PE=1 SV=1
	c42824_g3	0.131353	-2.92848	F4I9E1	Protein NUCLEAR FUSION DEFECTIVE 4 OS=Arabidopsis thaliana GN=NFD4 PE=3 SV=1
	c56392_g4	0.13097	-2.93269
	c60520_g4	0.130883	-2.93365
	c64886_g1	0.130821	-2.93433	Q8H1D6	Receptor-like cytosolic serine/threonine-protein kinase RBK1 OS=Arabidopsis thaliana GN=RBK1 PE=1 SV=1
	c62254_g2	0.130576	-2.93704
	c29048_g1	0.130244	-2.94071	Q42410	Zinc finger protein ZAT12 OS=Arabidopsis thaliana GN=ZAT12 PE=2 SV=1
	c61251_g4	0.130087	-2.94245	Q9LIR9	Probable magnesium transporter NIPA1 OS=Arabidopsis thaliana GN=At3g23870 PE=2 SV=1
	c10880_g2	0.129847	-2.94512	Q8GV43	Phosphoinositide phospholipase C 6 OS=Arabidopsis thaliana GN=PLC6 PE=2 SV=2
	c94713_g1	0.12958	-2.94808
	c134766_g1	0.129548	-2.94844	Q9FY71	Protein EXORDIUM-like 4 OS=Arabidopsis thaliana GN=EXL4 PE=2 SV=1
	c63063_g12	0.129548	-2.94844
	c27045_g1	0.129272	-2.95152	Q9ZWB4	Coumaroyl-CoA:anthocyanidin 3-O-glucoside-6''-O-coumaroyltransferase 1 OS=Arabidopsis thaliana GN=3AT1 PE=1 SV=1
	c63235_g13	0.129184	-2.95251
	c71846_g1	0.129058	-2.95391	Q38997	SNF1-related protein kinase catalytic subunit alpha KIN10 OS=Arabidopsis thaliana GN=KIN10 PE=1 SV=2
	c121012_g1	0.129006	-2.95449
	c83449_g1	0.128887	-2.95582	P02519	17.3 kDa class I heat shock protein OS=Glycine max GN=HSP17.3-B PE=3 SV=1
	c60069_g2	0.128887	-2.95582
	c52183_g1	0.128881	-2.95588	Q8VZ80	Polyol transporter 5 OS=Arabidopsis thaliana GN=PLT5 PE=1 SV=2
	c59796_g1	0.128663	-2.95833	Q9FSG7	Thaumatin-like protein 1a OS=Malus domestica GN=TL1 PE=1 SV=1
	c60285_g2	0.1276	-2.9703	O49696	Aluminum-activated malate transporter 12 OS=Arabidopsis thaliana GN=ALMT12 PE=2 SV=1
	c31947_g1	0.127084	-2.97614
	c59307_g1	0.126716	-2.98033	A0A151QR33	IST1-like protein OS=Cajanus cajan GN=KK1_046528 PE=4 SV=1
	c2919_g1	0.126647	-2.98111	Q9C5L3	Putative glycerol-3-phosphate transporter 1 OS=Arabidopsis thaliana GN=At3g47420 PE=2 SV=1
	c58367_g2	0.126425	-2.98365	Q7XKV4	Beta-glucosidase 12 OS=Oryza sativa subsp. japonica GN=BGLU12 PE=2 SV=2
	c61246_g3	0.126312	-2.98494	Q93ZE9	Phosphatidylinositol/phosphatidylcholine transfer protein SFH3 OS=Arabidopsis thaliana GN=SFH3 PE=2 SV=1
	c120907_g1	0.126064	-2.98777	O22768	Transcription factor UNE12 OS=Arabidopsis thaliana GN=UNE12 PE=2 SV=2
	c50575_g1	0.126062	-2.98779	V7CKE8	Uncharacterized protein OS=Phaseolus vulgaris GN=PHAVU_002G170100g PE=4 SV=1
	c135179_g1	0.125963	-2.98893	F4I5N6	CRIB domain-containing protein RIC3 OS=Arabidopsis thaliana GN=RIC3 PE=1 SV=1
	c61798_g14	0.125752	-2.99135	O48916	Fatty acid 2-hydroxylase 1 OS=Arabidopsis thaliana GN=FAH1 PE=1 SV=1
	c138061_g1	0.125317	-2.99634	Q9FY94	Bidirectional sugar transporter SWEET15 OS=Arabidopsis thaliana GN=SWEET15 PE=2 SV=1
	c16261_g1	0.125052	-2.9994	O48928	Cytochrome P450 77A3 OS=Glycine max GN=CYP77A3 PE=2 SV=1
	c64083_g1	0.124954	-3.00053	Q9SJ52	Protein YLS9 OS=Arabidopsis thaliana GN=YLS9 PE=2 SV=1
	c32792_g1	0.124923	-3.00089	P10978	Retrovirus-related Pol polyprotein from transposon TNT 1-94 OS=Nicotiana tabacum PE=2 SV=1
	c38863_g2	0.124325	-3.00781
	c28238_g1	0.124325	-3.00781	Q109R6	Protein CutA 1, chloroplastic OS=Oryza sativa subsp. japonica GN=CUTA1 PE=1 SV=1
	c61331_g2	0.124325	-3.00781
	c1657_g1	0.124105	-3.01037
	c57317_g5	0.124105	-3.01037
	c108281_g1	0.123912	-3.01261	I1NCL7	Uncharacterized protein OS=Glycine max GN=GLYMA_19G256000 PE=4 SV=1
	c121073_g1	0.123881	-3.01298	Q40541	Mitogen-activated protein kinase kinase kinase NPK1 OS=Nicotiana tabacum GN=NPK1 PE=1 SV=1
	c69029_g1	0.123859	-3.01323	Q9SDN0	Chaperone protein dnaJ 20, chloroplastic OS=Arabidopsis thaliana GN=ATJ20 PE=1 SV=2
	c63465_g5	0.123733	-3.0147
	c7146_g1	0.123627	-3.01593	P93331	Nodulin-1 OS=Medicago truncatula GN=N1 PE=2 SV=1
	c94360_g1	0.123502	-3.01739
	c33405_g1	0.123142	-3.0216
	c8375_g1	0.123084	-3.02228
	c43702_g1	0.123006	-3.0232
	c3490_g1	0.122776	-3.02591	Q5EAF2	Type I inositol 1,4,5-trisphosphate 5-phosphatase 11 OS=Arabidopsis thaliana GN=At1g47510 PE=2 SV=1
	c63501_g4	0.122762	-3.02606	Q3E8W4	Receptor-like protein kinase ANXUR2 OS=Arabidopsis thaliana GN=ANX2 PE=2 SV=1
	c120680_g1	0.122613	-3.02782
	c62986_g1	0.122218	-3.03247
	c25425_g1	0.122191	-3.03279
	c56886_g2	0.122145	-3.03333
	c17008_g1	0.122087	-3.03402	P10978	Retrovirus-related Pol polyprotein from transposon TNT 1-94 OS=Nicotiana tabacum PE=2 SV=1
	c80352_g1	0.122035	-3.03463	A0A151R218	Proton-coupled amino acid transporter 1 OS=Cajanus cajan GN=KK1_042300 PE=4 SV=1
	c126811_g1	0.121966	-3.03545
	c61990_g3	0.121966	-3.03545	P0DH79	CBS domain-containing protein CBSCBSPB5 OS=Arabidopsis thaliana GN=CBSCBSPB5 PE=1 SV=1
	c110358_g1	0.121966	-3.03545
	c57716_g1	0.121966	-3.03545	Q9LE59	Polygalacturonate 4-alpha-galacturonosyltransferase OS=Arabidopsis thaliana GN=GAUT1 PE=1 SV=1
	c35486_g1	0.121966	-3.03545	Q9SZH0	V-type proton ATPase subunit G3 OS=Arabidopsis thaliana GN=VHA-G3 PE=3 SV=1
	c138303_g1	0.121966	-3.03545	P09114	Acetolactate synthase 2, chloroplastic OS=Nicotiana tabacum GN=ALS SURB PE=1 SV=1
	c21197_g1	0.121586	-3.03995
	c56707_g1	0.121177	-3.04481
	c45319_g1	0.121082	-3.04595
	c60710_g3	0.120841	-3.04881	O64645	MADS-box protein SOC1 OS=Arabidopsis thaliana GN=SOC1 PE=1 SV=1
	c121839_g1	0.120841	-3.04881
	c91739_g1	0.120754	-3.04986	Q6V4H0	8-hydroxygeraniol dehydrogenase OS=Catharanthus roseus GN=10HGO PE=1 SV=1
	c60072_g1	0.120396	-3.05414	C0LGJ1	Probable LRR receptor-like serine/threonine-protein kinase At1g74360 OS=Arabidopsis thaliana GN=At1g74360 PE=2 SV=1
	c60985_g12	0.120208	-3.0564
	c22889_g1	0.120134	-3.05728	Q5XVA8	Uncharacterized protein At3g49055 OS=Arabidopsis thaliana GN=At3g49055 PE=2 SV=1
	c50188_g2	0.11998	-3.05914	Q9CAC4	Myosin-binding protein 2 OS=Arabidopsis thaliana GN=MYOB2 PE=1 SV=1
	c125811_g1	0.119928	-3.05976	Q0JL44	Protein SGT1 homolog OS=Oryza sativa subsp. japonica GN=SGT1 PE=1 SV=1
	c58699_g2	0.119816	-3.06111	G7I595	Transducin/WD40 repeat protein OS=Medicago truncatula GN=MTR_1g021590 PE=4 SV=1
	c60831_g1	0.119808	-3.06121	Q9ZPE7	Protein EXORDIUM OS=Arabidopsis thaliana GN=EXO PE=2 SV=1
	c61564_g13	0.119328	-3.06699
	c140713_g1	0.119328	-3.06699
	c9914_g1	0.119171	-3.0689
	c63501_g3	0.118881	-3.07241	Q9SR05	Receptor-like protein kinase ANXUR1 OS=Arabidopsis thaliana GN=ANX1 PE=2 SV=1
	c44120_g1	0.118881	-3.07241	Q8GY60	Probable protein phosphatase 2C 52 OS=Arabidopsis thaliana GN=At4g03415 PE=2 SV=1
	c123243_g1	0.118871	-3.07253
	c65572_g1	0.118608	-3.07572
	c40131_g1	0.118266	-3.07989	Q0JIC2	Transcription factor GAMYB OS=Oryza sativa subsp. japonica GN=GAM1 PE=2 SV=1
	c68609_g1	0.118266	-3.07989	Q9THX6	Thylakoid lumenal 29 kDa protein, chloroplastic OS=Solanum lycopersicum GN=CLEB3J9 PE=3 SV=1
	c121267_g1	0.118219	-3.08046	Q9LVC0	Arabinogalactan peptide 14 OS=Arabidopsis thaliana GN=AGP14 PE=1 SV=1
	c61125_g1	0.118116	-3.08173	Q3EBF7	Delta(8)-fatty-acid desaturase 2 OS=Arabidopsis thaliana GN=SLD2 PE=1 SV=1
	c58881_g2	0.117993	-3.08322	Q9LJ64	Pollen-specific leucine-rich repeat extensin-like protein 1 OS=Arabidopsis thaliana GN=PEX1 PE=2 SV=1
	c79706_g1	0.117801	-3.08557
	c121320_g1	0.117796	-3.08564
	c36657_g1	0.117591	-3.08815	P22335	Heat shock factor protein HSF24 OS=Solanum peruvianum GN=HSF24 PE=2 SV=1
	c38333_g1	0.117282	-3.09195
	c50731_g1	0.117247	-3.09237	P0C883	Scarecrow-like protein 33 OS=Arabidopsis thaliana GN=SCL33 PE=1 SV=1
	c42462_g1	0.117045	-3.09487	Q9SGP6	Glutaredoxin-C9 OS=Arabidopsis thaliana GN=GRXC9 PE=1 SV=1
	c58402_g2	0.116915	-3.09647	O81765	Pollen-specific leucine-rich repeat extensin-like protein 4 OS=Arabidopsis thaliana GN=PEX4 PE=2 SV=1
	c94865_g1	0.116648	-3.09977	Q9SA68	Monothiol glutaredoxin-S1 OS=Arabidopsis thaliana GN=GRXS1 PE=3 SV=1
	c46240_g2	0.116469	-3.10199	B3LFA3	Probable magnesium transporter NIPA2 OS=Arabidopsis thaliana GN=At4g13800 PE=2 SV=1
	c58040_g3	0.11632	-3.10382	Q9FGH9	Exocyst complex component EXO70B1 OS=Arabidopsis thaliana GN=EXO70B1 PE=1 SV=1
	c9202_g1	0.116042	-3.10728	I1LRR2	Uncharacterized protein OS=Glycine max GN=GLYMA_12G099700 PE=4 SV=1
	c39572_g1	0.115879	-3.10931
	c80173_g1	0.11583	-3.10991	F4JUF8	Dirigent protein 15 OS=Arabidopsis thaliana GN=DIR15 PE=3 SV=1
	c48763_g1	0.11583	-3.10991
	c51204_g1	0.115789	-3.11043	P22335	Heat shock factor protein HSF24 OS=Solanum peruvianum GN=HSF24 PE=2 SV=1
	c59584_g7	0.115702	-3.11151
	c60935_g1	0.115669	-3.11193	P25848	Light-sensor Protein kinase OS=Ceratodon purpureus GN=PHY1 PE=3 SV=3
	c9835_g1	0.115663	-3.11201	Q9ZW82	Pirin-like protein At2g43120 OS=Arabidopsis thaliana GN=At2g43120 PE=2 SV=3
	c51527_g1	0.115654	-3.11212
	c37880_g2	0.115648	-3.11219
	c62829_g3	0.115607	-3.1127
	c45310_g1	0.115584	-3.11299	G7I595	Transducin/WD40 repeat protein OS=Medicago truncatula GN=MTR_1g021590 PE=4 SV=1
	c94743_g1	0.114967	-3.12071	Q9SMN0	Probable carboxylesterase 12 OS=Arabidopsis thaliana GN=CXE12 PE=1 SV=1
	c142547_g1	0.114683	-3.12427	Q9LZA6	Triacylglycerol lipase SDP1 OS=Arabidopsis thaliana GN=SDP1 PE=1 SV=1
	c94204_g1	0.114517	-3.12636	Q9ZVM9	Probable serine/threonine-protein kinase At1g54610 OS=Arabidopsis thaliana GN=At1g54610 PE=1 SV=1
	c541_g1	0.114409	-3.12773
	c46375_g1	0.114275	-3.12942
	c8144_g1	0.114143	-3.13108	Q94C59	Patellin-4 OS=Arabidopsis thaliana GN=PATL4 PE=1 SV=2
	c58898_g2	0.113789	-3.13556
	c53985_g1	0.113788	-3.13558	Q9SAH7	Probable WRKY transcription factor 40 OS=Arabidopsis thaliana GN=WRKY40 PE=1 SV=1
	c95057_g1	0.113586	-3.13814	Q9FG72	Oligopeptide transporter 1 OS=Arabidopsis thaliana GN=OPT1 PE=2 SV=1
	c42351_g1	0.113586	-3.13814
	c58888_g1	0.11334	-3.14127	Q9FK16	Arabinogalactan peptide 22 OS=Arabidopsis thaliana GN=AGP22 PE=3 SV=1
	c49721_g3	0.113331	-3.14138	Q3EBF7	Delta(8)-fatty-acid desaturase 2 OS=Arabidopsis thaliana GN=SLD2 PE=1 SV=1
	c48266_g1	0.113102	-3.14431
	c58688_g2	0.112885	-3.14707	F6GV04	Rhomboid-like protein OS=Vitis vinifera GN=VIT_06s0004g04890 PE=3 SV=1
	c89428_g1	0.112792	-3.14827
	c31634_g1	0.112698	-3.14947	Q41062	Protein translocase subunit SecA, chloroplastic OS=Pisum sativum GN=secA PE=2 SV=1
	c1040_g1	0.112492	-3.1521
	c40271_g2	0.112492	-3.1521	Q9LT89	Transcription factor TCP19 OS=Arabidopsis thaliana GN=TCP19 PE=2 SV=1
	c61533_g6	0.112492	-3.1521	Q56XJ7	Uncharacterized protein At4g22758 OS=Arabidopsis thaliana GN=At4g22758 PE=2 SV=1
	c37365_g1	0.112492	-3.1521
	c68227_g1	0.112492	-3.1521
	c60285_g3	0.112492	-3.1521	O49696	Aluminum-activated malate transporter 12 OS=Arabidopsis thaliana GN=ALMT12 PE=2 SV=1
	c12911_g1	0.112166	-3.15629	Q8RXL8	Uncharacterized membrane protein At1g06890 OS=Arabidopsis thaliana GN=At1g06890 PE=1 SV=1
	c55560_g2	0.112004	-3.15838
	c52526_g1	0.111635	-3.16314	Q8VYI9	Non-specific lipid-transfer protein-like protein At5g64080 OS=Arabidopsis thaliana GN=At5g64080 PE=1 SV=1
	c50751_g1	0.111612	-3.16343
	c79250_g1	0.11157	-3.16398
	c37334_g1	0.111382	-3.16641
	c60337_g2	0.111382	-3.16641	O64791	Syntaxin-124 OS=Arabidopsis thaliana GN=SYP124 PE=2 SV=1
	c62771_g1	0.111382	-3.16641	Q9ZSY2	Chaperone protein dnaJ 15 OS=Arabidopsis thaliana GN=ATJ15 PE=1 SV=1
	c47241_g1	0.111378	-3.16647	Q84MA5	Cationic amino acid transporter 1 OS=Arabidopsis thaliana GN=CAT1 PE=1 SV=1
	c59641_g1	0.111266	-3.16791	Q94K98	UPF0392 protein At1g27200 OS=Arabidopsis thaliana GN=At1g27200 PE=2 SV=2
	c36882_g1	0.111226	-3.16844	Q9SXS3	2-hydroxyisoflavanone synthase OS=Glycyrrhiza echinata GN=CYP93C2 PE=1 SV=1
	c45518_g1	0.111031	-3.17097	Q8VZF6	Protein ENHANCED DISEASE RESISTANCE 2-like OS=Arabidopsis thaliana GN=EDR2L PE=2 SV=1
	c61399_g9	0.110498	-3.17791
	c62072_g8	0.11027	-3.18089
	c33126_g1	0.110018	-3.18419	Q9M0B6	UDP-glucuronate 4-epimerase 1 OS=Arabidopsis thaliana GN=GAE1 PE=1 SV=1
	c63734_g2	0.110018	-3.18419	Q9LSY7	Peroxidase 30 OS=Arabidopsis thaliana GN=PER30 PE=1 SV=1
	c89863_g1	0.109846	-3.18645
	c55506_g2	0.109752	-3.18768
	c63300_g1	0.109752	-3.18768	Q9FMP5	Calcium-dependent protein kinase 17 OS=Arabidopsis thaliana GN=CPK17 PE=2 SV=1
	c57764_g2	0.109686	-3.18855	Q8LFP7	Aquaporin NIP1-2 OS=Arabidopsis thaliana GN=NIP1-2 PE=2 SV=2
	c61246_g2	0.109418	-3.19207	Q94A34	Phosphatidylinositol/phosphatidylcholine transfer protein SFH12 OS=Arabidopsis thaliana GN=SFH12 PE=2 SV=1
	c49229_g1	0.109262	-3.19413
	c70679_g1	0.109262	-3.19413	Q41014	Ferredoxin--NADP reductase, root isozyme, chloroplastic OS=Pisum sativum PE=2 SV=2
	c47652_g1	0.109138	-3.19577	G7JCR3	LMBR1 integral membrane-like protein OS=Medicago truncatula GN=MTR_4g094110 PE=4 SV=2
	c59951_g2	0.109138	-3.19577
	c33428_g1	0.109138	-3.19577
	c33504_g2	0.109138	-3.19577
	c51444_g1	0.109138	-3.19577	A0A0R0JZE7	Uncharacterized protein OS=Glycine max GN=GLYMA_05G215000 PE=4 SV=1
	c50474_g1	0.109003	-3.19756	P15722	Probable pectate lyase P59 OS=Solanum lycopersicum GN=LAT59 PE=2 SV=1
	c141118_g1	0.108826	-3.19991	Q58FX0	BON1-associated protein 2 OS=Arabidopsis thaliana GN=BAP2 PE=1 SV=1
	c57848_g1	0.108669	-3.20199	Q9LFE4	WEB family protein At5g16730, chloroplastic OS=Arabidopsis thaliana GN=At5g16730 PE=1 SV=1
	c79284_g1	0.108608	-3.20279
	c47789_g1	0.108595	-3.20297
	c25425_g2	0.108547	-3.20361	Q9FJ21	Probable pectinesterase/pectinesterase inhibitor 58 OS=Arabidopsis thaliana GN=PME58 PE=2 SV=1
	c120852_g1	0.108523	-3.20393
	c95486_g1	0.108459	-3.20478	Q8LC45	Probable xyloglucan endotransglucosylase/hydrolase protein 33 OS=Arabidopsis thaliana GN=XTH33 PE=2 SV=2
	c53791_g2	0.108252	-3.20753
	c53940_g2	0.10816	-3.20877	Q9FMW4	Putative GEM-like protein 8 OS=Arabidopsis thaliana GN=At5g23370 PE=3 SV=1
	c24748_g1	0.108114	-3.20938
	c69729_g1	0.10796	-3.21143
	c40113_g1	0.107849	-3.21291
	c48122_g1	0.107813	-3.21339
	c45986_g1	0.107751	-3.21423
	c54224_g2	0.107544	-3.217
	c47710_g1	0.107222	-3.22133
	c30459_g1	0.107222	-3.22133
	c58040_g2	0.107135	-3.2225	Q9FGH9	Exocyst complex component EXO70B1 OS=Arabidopsis thaliana GN=EXO70B1 PE=1 SV=1
	c61648_g7	0.106991	-3.22444
	c59622_g2	0.106851	-3.22633	Q9SRR7	Calmodulin-like protein 3 OS=Arabidopsis thaliana GN=CML3 PE=2 SV=1
	c63169_g4	0.10628	-3.23406	Q8H1D6	Receptor-like cytosolic serine/threonine-protein kinase RBK1 OS=Arabidopsis thaliana GN=RBK1 PE=1 SV=1
	c60337_g4	0.105948	-3.23857	O64791	Syntaxin-124 OS=Arabidopsis thaliana GN=SYP124 PE=2 SV=1
	c64177_g1	0.105673	-3.24232
	c78409_g1	0.105565	-3.2438	Q6H5U3	Sphingolipid delta(4)-desaturase DES1-like OS=Oryza sativa subsp. japonica GN=Os02g0639600 PE=2 SV=1
	c56690_g3	0.105536	-3.24419	Q8S8S7	U-box domain-containing protein 34 OS=Arabidopsis thaliana GN=PUB34 PE=3 SV=1
	c94570_g1	0.105536	-3.24419
	c42445_g1	0.105256	-3.24803	B9HH77	Uncharacterized protein OS=Populus trichocarpa GN=POPTR_0007s02190g PE=4 SV=1
	c33793_g2	0.105128	-3.24978
	c93713_g1	0.105062	-3.25068	O48809	Leucine-rich repeat extensin-like protein 2 OS=Arabidopsis thaliana GN=LRX2 PE=2 SV=1
	c62425_g1	0.10506	-3.25071	Q94A08	Probable galactinol--sucrose galactosyltransferase 2 OS=Arabidopsis thaliana GN=RFS2 PE=2 SV=2
	c64097_g1	0.104796	-3.25434	Q43017	Non-specific lipid-transfer protein 1 OS=Prunus dulcis PE=3 SV=1
	c120902_g1	0.104171	-3.26297	Q9SIT5	Cation/H(+) antiporter 15 OS=Arabidopsis thaliana GN=CHX15 PE=2 SV=1
	c106669_g1	0.104101	-3.26395	P52425	Glycerol-3-phosphate dehydrogenase [NAD(+)] OS=Cuphea lanceolata GN=GPDH PE=2 SV=1
	c107740_g1	0.103855	-3.26736	Q9LRJ9	Cysteine-rich repeat secretory protein 38 OS=Arabidopsis thaliana GN=CRRSP38 PE=2 SV=1
	c84214_g1	0.10384	-3.26756	Q9XHP4	Amine oxidase OS=Glycine max GN=PAO1 PE=2 SV=1
	c60520_g2	0.10376	-3.26867	Q7Y201	Probable pectinesterase/pectinesterase inhibitor 13 OS=Arabidopsis thaliana GN=PME13 PE=2 SV=2
	c41615_g1	0.103631	-3.27047
	c135338_g1	0.103631	-3.27047
	c8924_g1	0.103532	-3.27186	Q42438	Calcium-dependent protein kinase 8 OS=Arabidopsis thaliana GN=CPK8 PE=1 SV=1
	c65474_g1	0.103361	-3.27424	Q9ZQH1	Probable calcium-binding protein CML48 OS=Arabidopsis thaliana GN=CML48 PE=2 SV=2
	c63406_g2	0.103219	-3.27623	Q9SJT0	Probable receptor-like protein kinase At2g21480 OS=Arabidopsis thaliana GN=At2g21480 PE=3 SV=1
	c37931_g1	0.103219	-3.27623	P43309	Polyphenol oxidase, chloroplastic OS=Malus domestica PE=2 SV=1
	c68269_g1	0.103113	-3.2777	P32295	Indole-3-acetic acid-induced protein ARG7 OS=Vigna radiata var. radiata GN=ARG7 PE=2 SV=1
	c107411_g1	0.102997	-3.27933
	c60220_g1	0.102997	-3.27933	Q9SGS2	High mobility group B protein 9 OS=Arabidopsis thaliana GN=HMGB9 PE=2 SV=1
	c56813_g1	0.102997	-3.27933	F4I037	Protein trichome berefringence-like 7 OS=Arabidopsis thaliana GN=TBL7 PE=3 SV=1
	c29487_g1	0.102997	-3.27933
	c94267_g1	0.102714	-3.28329	Q9FYK2	Probable calcium-binding protein CML25 OS=Arabidopsis thaliana GN=CML25 PE=2 SV=1
	c42379_g1	0.102694	-3.28358	P37273	Phytoene synthase 2, chloroplastic (Fragment) OS=Solanum lycopersicum GN=PSY2 PE=2 SV=1
	c53620_g1	0.102459	-3.28689	P48480	Serine/threonine-protein phosphatase PP1 isozyme 1 OS=Acetabularia peniculus PE=3 SV=1
	c63997_g1	0.10239	-3.28785
	c57476_g1	0.102196	-3.29059
	c40842_g1	0.102094	-3.29204
	c94199_g1	0.101904	-3.29471	O48724	Protein WEAK CHLOROPLAST MOVEMENT UNDER BLUE LIGHT 1 OS=Arabidopsis thaliana GN=WEB1 PE=1 SV=1
	c53852_g2	0.10184	-3.29562
	c120560_g1	0.101586	-3.29923	Q949G5	MOB kinase activator-like 1A OS=Medicago sativa subsp. falcata GN=MOB1-A PE=2 SV=2
	c125095_g1	0.101515	-3.30023
	c63045_g3	0.101497	-3.3005	Q9FXH6	Putative cyclic nucleotide-gated ion channel 8 OS=Arabidopsis thaliana GN=CNGC8 PE=3 SV=2
	c51152_g1	0.1014	-3.30187	Q9ZNS6	Hydrophobic protein RCI2B OS=Arabidopsis thaliana GN=RCI2B PE=2 SV=1
	c42903_g1	0.101186	-3.30492	Q9C942	Caffeoylshikimate esterase OS=Arabidopsis thaliana GN=CSE PE=1 SV=1
	c37147_g1	0.101174	-3.30509	Q84JQ4	Pollen receptor-like kinase 2 OS=Arabidopsis thaliana GN=PRK2 PE=1 SV=1
	c83783_g1	0.101001	-3.30756
	c86078_g1	0.10047	-3.31517	Q9FZ62	Inorganic pyrophosphatase 2 OS=Arabidopsis thaliana GN=At1g17710 PE=2 SV=1
	c37645_g1	0.100462	-3.31527	C6TBN2	Probable aldo-keto reductase 1 OS=Glycine max GN=AKR1 PE=2 SV=1
	c62445_g5	0.10043	-3.31573	O81635	Kinesin-4 OS=Arabidopsis thaliana GN=ATK4 PE=1 SV=2
	c58019_g1	0.100365	-3.31667	Q9ZRF1	Probable mannitol dehydrogenase OS=Fragaria ananassa GN=CAD PE=2 SV=1
	c28417_g1	0.100178	-3.31936
	c14459_g1	0.100178	-3.31936
	c59880_g5	0.10016	-3.31962	Q9LSP1	Probable pectinesterase 67 OS=Arabidopsis thaliana GN=PME67 PE=2 SV=1
	c49180_g1	0.0994314	-3.33015
	c50460_g3	0.09927	-3.3325	A0A151R9J6	Putative transporter C5D6.04 OS=Cajanus cajan GN=KK1_039542 PE=4 SV=1
	c63299_g8	0.0989597	-3.33701	Q8VZF6	Protein ENHANCED DISEASE RESISTANCE 2-like OS=Arabidopsis thaliana GN=EDR2L PE=2 SV=1
	c109159_g1	0.0988762	-3.33823
	c135429_g1	0.0988762	-3.33823
	c7336_g1	0.0987354	-3.34029	Q9SPK4	Phosphoenolpyruvate carboxylase kinase 1 OS=Arabidopsis thaliana GN=PPCK1 PE=1 SV=1
	c57626_g3	0.0987354	-3.34029	Q9SYM5	Trifunctional UDP-glucose 4,6-dehydratase/UDP-4-keto-6-deoxy-D-glucose 3,5-epimerase/UDP-4-keto-L-rhamnose-reductase RHM1 OS=Arabidopsis thaliana GN=RHM1 PE=1 SV=1
	c57614_g1	0.0987354	-3.34029
	c120645_g1	0.0984419	-3.34458	O49859	Cytochrome P450 82A4 OS=Glycine max GN=CYP82A4 PE=2 SV=1
	c94968_g1	0.0982431	-3.3475	O48818	Expansin-A4 OS=Arabidopsis thaliana GN=EXPA4 PE=1 SV=1
	c61446_g4	0.0982431	-3.3475
	c78383_g1	0.0982057	-3.34805	A0A0R0K9R9	Uncharacterized protein OS=Glycine max GN=GLYMA_04G183400 PE=4 SV=1
	c42610_g1	0.0978668	-3.35304
	c64662_g1	0.0978491	-3.3533	Q9LNE7	Calmodulin-like protein 7 OS=Arabidopsis thaliana GN=CML7 PE=2 SV=1
	c61237_g1	0.0976166	-3.35673	Q8RXC8	Receptor-like cytosolic serine/threonine-protein kinase RBK2 OS=Arabidopsis thaliana GN=RBK2 PE=1 SV=1
	c42479_g1	0.0975095	-3.35831	Q9SDN0	Chaperone protein dnaJ 20, chloroplastic OS=Arabidopsis thaliana GN=ATJ20 PE=1 SV=2
	c42694_g1	0.0975095	-3.35831	Q9SRR7	Calmodulin-like protein 3 OS=Arabidopsis thaliana GN=CML3 PE=2 SV=1
	c45656_g1	0.0975081	-3.35833	Q9SLC4	RING-H2 finger protein ATL40 OS=Arabidopsis thaliana GN=ATL40 PE=2 SV=1
	c94134_g1	0.0975081	-3.35833
	c106343_g1	0.0972187	-3.36262	Q9SF29	Syntaxin-71 OS=Arabidopsis thaliana GN=SYP71 PE=1 SV=1
	c37381_g1	0.0970893	-3.36454	P52780	Glutamine--tRNA ligase OS=Lupinus luteus PE=2 SV=2
	c15667_g1	0.0970893	-3.36454
	c55615_g4	0.0968635	-3.3679	Q9LVD8	Putative clathrin assembly protein At5g57200 OS=Arabidopsis thaliana GN=At5g57200 PE=3 SV=1
	c138970_g1	0.0968393	-3.36826	P0CW97	Protein PLANT CADMIUM RESISTANCE 3 OS=Arabidopsis thaliana GN=PCR3 PE=3 SV=1
	c52920_g1	0.0968393	-3.36826
	c52706_g1	0.0968393	-3.36826
	c60495_g2	0.0966543	-3.37102	Q00624	L-ascorbate oxidase homolog OS=Brassica napus GN=Bp10 PE=2 SV=1
	c32883_g2	0.0966242	-3.37147	Q9LTW9	Fasciclin-like arabinogalactan protein 14 OS=Arabidopsis thaliana GN=FLA14 PE=2 SV=1
	c44484_g1	0.0965737	-3.37223
	c60009_g1	0.0965298	-3.37288	Q9FUB7	Chalcone synthase OS=Hypericum androsaemum PE=1 SV=1
	c53401_g1	0.0961258	-3.37893	Q39766	Polygalacturonase OS=Gossypium barbadense GN=G9 PE=2 SV=1
	c53271_g2	0.0960686	-3.37979	B6SGC5	Cell number regulator 6 OS=Zea mays GN=CNR6 PE=2 SV=1
	c94067_g1	0.0956483	-3.38612	Q38JC8	Temperature-induced lipocalin OS=Medicago truncatula GN=TIL PE=2 SV=1
	c38995_g1	0.0956242	-3.38648	Q8H038	Xyloglucan galactosyltransferase KATAMARI1 homolog OS=Oryza sativa subsp. japonica GN=Os03g0144800 PE=2 SV=1
	c39000_g1	0.09562	-3.38654	Q8GX86	Probable pectinesterase/pectinesterase inhibitor 21 OS=Arabidopsis thaliana GN=PME21 PE=2 SV=2
	c56012_g2	0.0954033	-3.38982	Q9M8J2	Probable galacturonosyltransferase-like 4 OS=Arabidopsis thaliana GN=GATL4 PE=2 SV=1
	c37060_g1	0.0953532	-3.39058	Q9LFP5	Probable pectate lyase 19 OS=Arabidopsis thaliana GN=At5g15110 PE=2 SV=1
	c83984_g1	0.0951503	-3.39365	Q9M7K4	Potassium transporter 5 OS=Arabidopsis thaliana GN=POT5 PE=1 SV=1
	c60960_g1	0.0951503	-3.39365	Q9SIQ7	Calcium-dependent protein kinase 24 OS=Arabidopsis thaliana GN=CPK24 PE=2 SV=1
	c55175_g1	0.0951503	-3.39365	A0A0D2ZVE2	Uncharacterized protein OS=Brassica oleracea var. oleracea PE=4 SV=1
	c107142_g1	0.0951503	-3.39365	Q9LI84	Probable calcium-binding protein CML16 OS=Arabidopsis thaliana GN=CML16 PE=2 SV=2
	c60428_g3	0.0951503	-3.39365
	c121583_g1	0.0951503	-3.39365	Q94JX5	LIM domain-containing protein WLIM1 OS=Arabidopsis thaliana GN=WLIM1 PE=1 SV=1
	c45950_g2	0.0951503	-3.39365	P98204	Phospholipid-transporting ATPase 1 OS=Arabidopsis thaliana GN=ALA1 PE=2 SV=1
	c50881_g1	0.0951503	-3.39365	Q9ZUV3	Probable glucuronoxylan glucuronosyltransferase IRX7 OS=Arabidopsis thaliana GN=IRX7 PE=2 SV=1
	c15343_g1	0.0951503	-3.39365
	c47093_g1	0.0949795	-3.39624
	c56151_g1	0.0949795	-3.39624	Q9M0X5	Cysteine-rich receptor-like protein kinase 25 OS=Arabidopsis thaliana GN=CRK25 PE=3 SV=1
	c81215_g1	0.0949795	-3.39624
	c17358_g1	0.0949795	-3.39624	Q9LSQ6	Calcium-binding protein PBP1 OS=Arabidopsis thaliana GN=PBP1 PE=1 SV=1
	c42022_g1	0.0948845	-3.39768	P83326	Pectinesterase inhibitor OS=Actinidia deliciosa GN=PMEI PE=1 SV=2
	c105268_g1	0.0948845	-3.39768	Q8LDQ4	PP2A regulatory subunit TAP46 OS=Arabidopsis thaliana GN=TAP46 PE=1 SV=2
	c102004_g1	0.0948845	-3.39768	Q6DBP4	Pectin acetylesterase 8 OS=Arabidopsis thaliana GN=PAE8 PE=2 SV=1
	c60040_g1	0.0946063	-3.40192	O22815	MLO-like protein 5 OS=Arabidopsis thaliana GN=MLO5 PE=2 SV=1
	c39029_g1	0.0943466	-3.40589	Q9FWW5	WEB family protein At1g12150 OS=Arabidopsis thaliana GN=At1g12150 PE=2 SV=1
	c92692_g1	0.0942157	-3.40789
	c9154_g1	0.0941484	-3.40892	Q9FE20	Serine/threonine-protein kinase PBS1 OS=Arabidopsis thaliana GN=PBS1 PE=1 SV=1
	c59584_g10	0.0939397	-3.41212	Q9M2S4	L-type lectin-domain containing receptor kinase S.4 OS=Arabidopsis thaliana GN=LECRKS4 PE=2 SV=1
	c52719_g1	0.0937119	-3.41562	Q9LMA8	Protein TIFY 10A OS=Arabidopsis thaliana GN=TIFY10A PE=1 SV=1
	c22441_g1	0.0933278	-3.42155
	c107774_g1	0.0930528	-3.42581
	c54853_g2	0.0930071	-3.42652	Q9SZY4	Protein NRT1/ PTR FAMILY 6.2 OS=Arabidopsis thaliana GN=NPF6.2 PE=1 SV=1
	c52876_g1	0.0930071	-3.42652	O82352	Reticulon-like protein B5 OS=Arabidopsis thaliana GN=RTNLB5 PE=1 SV=1
	c59204_g2	0.0930071	-3.42652
	c61068_g2	0.0926052	-3.43276	Q42920	Pectinesterase/pectinesterase inhibitor OS=Medicago sativa PE=2 SV=1
	c82312_g1	0.0925867	-3.43305
	c32636_g3	0.0925774	-3.4332
	c59487_g7	0.0923792	-3.43629	F4JQ95	Diacylglycerol kinase 7 OS=Arabidopsis thaliana GN=DGK7 PE=1 SV=1
	c131747_g1	0.0922045	-3.43902	Q84VX0	Probable galactinol--sucrose galactosyltransferase 1 OS=Arabidopsis thaliana GN=RFS1 PE=2 SV=1
	c62622_g2	0.0918164	-3.4451	O49323	Cellulose synthase-like protein D1 OS=Arabidopsis thaliana GN=CSLD1 PE=2 SV=1
	c44442_g2	0.0917808	-3.44566	P20026	Myb-related protein Hv1 OS=Hordeum vulgare GN=MYB1 PE=2 SV=1
	c33412_g1	0.0916889	-3.44711
	c27401_g1	0.0914864	-3.4503	Q9FRH3	Putative clathrin assembly protein At1g25240 OS=Arabidopsis thaliana GN=At1g25240 PE=3 SV=1
	c49954_g1	0.0914317	-3.45116	P0C550	Potassium channel AKT1 OS=Oryza sativa subsp. indica GN=AKT1 PE=2 SV=1
	c78889_g1	0.0913542	-3.45239
	c24924_g1	0.0911522	-3.45558	Q9C523	Dirigent protein 19 OS=Arabidopsis thaliana GN=DIR19 PE=2 SV=1
	c58058_g1	0.0911288	-3.45595
	c56313_g2	0.0910831	-3.45667
	c62736_g1	0.0910507	-3.45719	Q9ZVM9	Probable serine/threonine-protein kinase At1g54610 OS=Arabidopsis thaliana GN=At1g54610 PE=1 SV=1
	c42610_g2	0.0903959	-3.4676	O48818	Expansin-A4 OS=Arabidopsis thaliana GN=EXPA4 PE=1 SV=1
	c72589_g1	0.0903959	-3.4676	Q56XP4	Sodium/hydrogen exchanger 2 OS=Arabidopsis thaliana GN=NHX2 PE=2 SV=2
	c10529_g2	0.090347	-3.46838
	c80823_g1	0.0902938	-3.46923
	c45010_g2	0.0902938	-3.46923	Q9FE20	Serine/threonine-protein kinase PBS1 OS=Arabidopsis thaliana GN=PBS1 PE=1 SV=1
	c58044_g1	0.0901681	-3.47124	Q94JX5	LIM domain-containing protein WLIM1 OS=Arabidopsis thaliana GN=WLIM1 PE=1 SV=1
	c36552_g1	0.0899214	-3.47519	Q9FJR1	Peroxidase 65 OS=Arabidopsis thaliana GN=PER65 PE=2 SV=2
	c45521_g1	0.0897189	-3.47844	Q9SY14	CSC1-like protein At4g02900 OS=Arabidopsis thaliana GN=At4g02900 PE=3 SV=1
	c82733_g1	0.0895312	-3.48147	Q58FX0	BON1-associated protein 2 OS=Arabidopsis thaliana GN=BAP2 PE=1 SV=1
	c37165_g1	0.0895229	-3.4816	Q9MA63	REF/SRPP-like protein At3g05500 OS=Arabidopsis thaliana GN=At3g05500 PE=1 SV=1
	c85593_g1	0.0892579	-3.48588	H2DH24	Cytochrome P450 CYP82D47 OS=Panax ginseng PE=2 SV=1
	c79289_g1	0.0890945	-3.48852	Q0DWQ1	Probable monogalactosyldiacylglycerol synthase 3, chloroplastic OS=Oryza sativa subsp. japonica GN=MGD3 PE=3 SV=2
	c34298_g1	0.0890266	-3.48962
	c60520_g6	0.0889472	-3.49091	Q7Y201	Probable pectinesterase/pectinesterase inhibitor 13 OS=Arabidopsis thaliana GN=PME13 PE=2 SV=2
	c43318_g2	0.0889472	-3.49091	Q9SMY6	Putative pectinesterase/pectinesterase inhibitor 45 OS=Arabidopsis thaliana GN=PME45 PE=2 SV=1
	c22079_g1	0.0888318	-3.49278	Q9SU64	Probable cyclic nucleotide-gated ion channel 16 OS=Arabidopsis thaliana GN=CNGC16 PE=2 SV=1
	c109869_g1	0.0887082	-3.49479
	c120412_g1	0.0885786	-3.4969	Q93Z27	Probable calcium-binding protein CML45 OS=Arabidopsis thaliana GN=CML45 PE=1 SV=1
	c93519_g1	0.0881201	-3.50438	O80482	Transcription factor bHLH149 OS=Arabidopsis thaliana GN=BHLH149 PE=1 SV=1
	c16775_g1	0.0881201	-3.50438	Q8VZ80	Polyol transporter 5 OS=Arabidopsis thaliana GN=PLT5 PE=1 SV=2
	c60845_g3	0.088073	-3.50516	Q6NKX1	Proline dehydrogenase 2, mitochondrial OS=Arabidopsis thaliana GN=POX2 PE=2 SV=1
	c35927_g1	0.0879389	-3.50735	Q8GTB6	Tetrahydrocannabinolic acid synthase OS=Cannabis sativa PE=1 SV=1
	c62729_g2	0.087903	-3.50794	A0A151SKJ0	GTPase-activating protein GYP7 OS=Cajanus cajan GN=KK1_001528 PE=4 SV=1
	c135750_g1	0.0877957	-3.50971
	c52753_g1	0.0877957	-3.50971	P0C2F6	Putative ribonuclease H protein At1g65750 OS=Arabidopsis thaliana GN=At1g65750 PE=3 SV=1
	c128285_g1	0.0877477	-3.5105	Q39287	Omega-6 fatty acid desaturase, endoplasmic reticulum OS=Brassica juncea PE=2 SV=1
	c24237_g1	0.087667	-3.51182	P00302	Stellacyanin OS=Toxicodendron vernicifluum PE=1 SV=1
	c28706_g1	0.0876495	-3.51211
	c135698_g1	0.0875556	-3.51366
	c106895_g1	0.0873769	-3.5166
	c46419_g1	0.0873601	-3.51688	Q9SD02	Probable protein phosphatase 2C 47 OS=Arabidopsis thaliana GN=At3g51470 PE=1 SV=1
	c122015_g1	0.0873441	-3.51715	Q7XEY9	SPX domain-containing protein 3 OS=Oryza sativa subsp. japonica GN=SPX3 PE=2 SV=1
	c59614_g2	0.0873038	-3.51781
	c5190_g1	0.0872942	-3.51797	Q9C7A2	Ankyrin repeat-containing protein At3g12360 OS=Arabidopsis thaliana GN=At3g12360 PE=2 SV=1
	c62525_g2	0.0871958	-3.5196	A6BM07	Isoflavone 7-O-glucosyltransferase 1 OS=Glycine max GN=GmIF7GT1 PE=1 SV=1
	c63063_g6	0.0871927	-3.51965
	c15115_g1	0.0871515	-3.52033	Q9SGA8	UDP-glycosyltransferase 83A1 OS=Arabidopsis thaliana GN=UGT83A1 PE=2 SV=1
	c68119_g1	0.0871097	-3.52102	Q5EAE9	RING-H2 finger protein ATL43 OS=Arabidopsis thaliana GN=ATL43 PE=2 SV=2
	c64852_g1	0.0870928	-3.5213
	c1609_g1	0.0868861	-3.52473	A2WWV5	Elicitor-responsive protein 1 OS=Oryza sativa subsp. indica GN=ERG1 PE=2 SV=2
	c64166_g1	0.086855	-3.52525	Q0WRY5	Serine/threonine-protein kinase CDL1 OS=Arabidopsis thaliana GN=CDL1 PE=1 SV=1
	c60667_g1	0.086644	-3.52876	Q00624	L-ascorbate oxidase homolog OS=Brassica napus GN=Bp10 PE=2 SV=1
	c61362_g5	0.0864931	-3.53127	Q39108	Heterodimeric geranylgeranyl pyrophosphate synthase small subunit, chloroplastic OS=Arabidopsis thaliana GN=GGR PE=1 SV=2
	c60145_g2	0.0864781	-3.53152	Q9LMC8	Probable myosin-binding protein 5 OS=Arabidopsis thaliana GN=MYOB5 PE=2 SV=1
	c62063_g1	0.0864562	-3.53189	Q5PNZ1	Probable protein S-acyltransferase 3 OS=Arabidopsis thaliana GN=PAT03 PE=2 SV=1
	c60461_g1	0.0864137	-3.5326	Q67ZM4	Actin-depolymerizing factor 7 OS=Arabidopsis thaliana GN=ADF7 PE=2 SV=1
	c64515_g1	0.0864137	-3.5326
	c16058_g1	0.0862875	-3.5347	Q84WW1	F-box protein At3g12350 OS=Arabidopsis thaliana GN=At3g12350 PE=2 SV=1
	c92486_g1	0.0860871	-3.53806	F4JIK2	Alpha carbonic anhydrase 4 OS=Arabidopsis thaliana GN=ACA4 PE=3 SV=1
	c61394_g8	0.0860489	-3.5387	Q84VX0	Probable galactinol--sucrose galactosyltransferase 1 OS=Arabidopsis thaliana GN=RFS1 PE=2 SV=1
	c134516_g1	0.0859053	-3.54111	Q9SIN1	Inactive TPR repeat-containing thioredoxin TTL3 OS=Arabidopsis thaliana GN=TTL3 PE=1 SV=2
	c47812_g1	0.0858612	-3.54185
	c61372_g3	0.0858036	-3.54282
	c73997_g1	0.0858036	-3.54282
	c107301_g1	0.0858036	-3.54282	Q9STR4	1-aminocyclopropane-1-carboxylate synthase 7 OS=Arabidopsis thaliana GN=ACS7 PE=1 SV=1
	c50815_g3	0.0858036	-3.54282	Q9ZUL3	Protein indeterminate-domain 5, chloroplastic OS=Arabidopsis thaliana GN=IDD5 PE=1 SV=1
	c58785_g6	0.0858036	-3.54282
	c83179_g1	0.0855791	-3.5466
	c51703_g4	0.0855241	-3.54752
	c36814_g2	0.0854577	-3.54865	Q84W04	Protein cornichon homolog 4 OS=Arabidopsis thaliana GN=At1g12390 PE=1 SV=1
	c54749_g1	0.0854347	-3.54903	Q0WQQ1	Probable ADP-ribosylation factor GTPase-activating protein AGD15 OS=Arabidopsis thaliana GN=AGD15 PE=2 SV=1
	c59269_g5	0.0853306	-3.55079	Q9SYG9	Cation/calcium exchanger 4 OS=Arabidopsis thaliana GN=CCX4 PE=2 SV=1
	c61347_g1	0.085162	-3.55365	Q9CA89	Rop guanine nucleotide exchange factor 12 OS=Arabidopsis thaliana GN=ROPGEF12 PE=1 SV=1
	c45609_g1	0.0851175	-3.5544
	c52739_g1	0.0851025	-3.55466	K7N4L6	Uncharacterized protein OS=Glycine max GN=GLYMA_20G199700 PE=4 SV=1
	c134717_g1	0.0851	-3.5547
	c16131_g1	0.08503	-3.55588	Q10PI5	Heptahelical transmembrane protein ADIPOR3 OS=Oryza sativa subsp. japonica GN=ADIPOR3 PE=2 SV=1
	c68768_g1	0.0849574	-3.55712
	c63902_g1	0.0849522	-3.55721	O49006	Pectinesterase/pectinesterase inhibitor 3 OS=Arabidopsis thaliana GN=PME3 PE=2 SV=2
	c79147_g1	0.0849415	-3.55739	Q9M015	Uncharacterized protein At5g01610 OS=Arabidopsis thaliana GN=At5g01610 PE=1 SV=1
	c79821_g1	0.0849081	-3.55795	Q9LHL6	Protein trichome birefringence-like 1 OS=Arabidopsis thaliana GN=TBL1 PE=2 SV=1
	c110170_g1	0.0846342	-3.56262	Q9XEE6	Zinc finger CCCH domain-containing protein 29 OS=Arabidopsis thaliana GN=At2g40140 PE=2 SV=1
	c32407_g1	0.0845264	-3.56445	Q6NKW9	Glucan endo-1,3-beta-glucosidase 8 OS=Arabidopsis thaliana GN=At1g64760 PE=1 SV=2
	c54937_g1	0.0845082	-3.56477
	c60495_g3	0.0842929	-3.56845	Q00624	L-ascorbate oxidase homolog OS=Brassica napus GN=Bp10 PE=2 SV=1
	c106953_g1	0.0842854	-3.56857	A0A0S3RV01	Uncharacterized protein OS=Vigna angularis var. angularis GN=Vigan.04G181500 PE=4 SV=1
	c62432_g5	0.084199	-3.57005	Q9LVN0	Glycerophosphodiester phosphodiesterase GDPDL7 OS=Arabidopsis thaliana GN=GDPDL7 PE=2 SV=1
	c15548_g1	0.0841074	-3.57162	Q9SMZ4	Alpha-aminoadipic semialdehyde synthase OS=Arabidopsis thaliana GN=LKR/SDH PE=1 SV=1
	c93133_g1	0.0840724	-3.57222	Q9FYC0	Cation/H(+) antiporter 12 OS=Arabidopsis thaliana GN=CHX12 PE=2 SV=2
	c80448_g1	0.0839574	-3.5742
	c63246_g8	0.0839275	-3.57471	O81221	Actin OS=Gossypium hirsutum PE=3 SV=1
	c46230_g2	0.0837714	-3.5774	Q9C757	Probable inositol transporter 2 OS=Arabidopsis thaliana GN=INT2 PE=1 SV=1
	c60510_g8	0.0837562	-3.57766	C0LGE0	Probable LRR receptor-like serine/threonine-protein kinase At1g07650 OS=Arabidopsis thaliana GN=At1g07650 PE=1 SV=1
	c56677_g1	0.0837462	-3.57783	A0A0B2NXZ3	Protein unc-45 like A OS=Glycine soja GN=glysoja_036700 PE=4 SV=1
	c60547_g2	0.0836117	-3.58015	Q67ZM4	Actin-depolymerizing factor 7 OS=Arabidopsis thaliana GN=ADF7 PE=2 SV=1
	c32777_g1	0.0835678	-3.58091	A0A076KWH5	Chitinase OS=Cicer arietinum PE=3 SV=1
	c63501_g1	0.08351	-3.58191	Q3E8W4	Receptor-like protein kinase ANXUR2 OS=Arabidopsis thaliana GN=ANX2 PE=2 SV=1
	c120834_g1	0.0834745	-3.58252	Q9LT15	Sugar transport protein 10 OS=Arabidopsis thaliana GN=STP10 PE=2 SV=1
	c22362_g1	0.0834006	-3.5838
	c47235_g1	0.0833266	-3.58508
	c85345_g1	0.0831693	-3.5878	Q570C0	Protein TRANSPORT INHIBITOR RESPONSE 1 OS=Arabidopsis thaliana GN=TIR1 PE=1 SV=2
	c122432_g1	0.0831693	-3.5878	Q9FGD7	Putative U-box domain-containing protein 50 OS=Arabidopsis thaliana GN=PUB50 PE=3 SV=1
	c60191_g1	0.0831582	-3.588	I1K701	Uncharacterized protein OS=Glycine max GN=GLYMA_06G004700 PE=4 SV=2
	c79086_g1	0.0831373	-3.58836
	c33437_g1	0.0831373	-3.58836
	c66448_g1	0.0831373	-3.58836
	c56690_g2	0.0830831	-3.5893	Q9SW11	U-box domain-containing protein 35 OS=Arabidopsis thaliana GN=PUB35 PE=1 SV=2
	c17727_g2	0.0830831	-3.5893	Q9LSF1	Serine/threonine-protein kinase OXI1 OS=Arabidopsis thaliana GN=OXI1 PE=1 SV=1
	c39983_g3	0.0830831	-3.5893
	c93466_g1	0.0830831	-3.5893
	c62345_g8	0.0830831	-3.5893	P27401	Pro-Pol polyprotein OS=Simian foamy virus type 3 (strain LK3) GN=pol PE=3 SV=2
	c9561_g1	0.0830421	-3.59001	Q9LZX4	Fasciclin-like arabinogalactan protein 10 OS=Arabidopsis thaliana GN=FLA10 PE=1 SV=1
	c93640_g1	0.0830197	-3.5904	O22227	Protein MIZU-KUSSEI 1 OS=Arabidopsis thaliana GN=MIZ1 PE=1 SV=1
	c106450_g1	0.0829735	-3.59121	Q9LMG8	Putative SNAP25 homologous protein SNAP30 OS=Arabidopsis thaliana GN=SNAP30 PE=3 SV=1
	c27903_g1	0.08273	-3.59545
	c60968_g7	0.0824511	-3.60032	Q93VG8	DeSI-like protein At4g17486 OS=Arabidopsis thaliana GN=At4g17486 PE=2 SV=1
	c59055_g1	0.082396	-3.60128
	c43846_g1	0.0823462	-3.60215	Q94A20	BI1-like protein OS=Arabidopsis thaliana GN=At4g15470 PE=2 SV=1
	c61160_g9	0.0823105	-3.60278	Q3E8Z8	Putative pectinesterase/pectinesterase inhibitor 28 OS=Arabidopsis thaliana GN=PME28 PE=2 SV=1
	c58898_g3	0.0822346	-3.60411
	c138607_g1	0.0821848	-3.60498
	c45420_g2	0.0821848	-3.60498
	c58752_g1	0.0821507	-3.60558
	c122039_g1	0.0820135	-3.60799	Q9SFT7	Serine/threonine-protein kinase At3g07070 OS=Arabidopsis thaliana GN=At3g07070 PE=2 SV=1
	c16128_g1	0.0819827	-3.60854
	c53791_g3	0.0818588	-3.61072	A0A0R0I3W0	Uncharacterized protein OS=Glycine max GN=GLYMA_09G048200 PE=4 SV=1
	c37887_g1	0.0816924	-3.61365
	c60565_g3	0.0814036	-3.61876	Q94AZ2	Sugar transport protein 13 OS=Arabidopsis thaliana GN=STP13 PE=1 SV=2
	c7166_g1	0.0813815	-3.61916	Q93ZE9	Phosphatidylinositol/phosphatidylcholine transfer protein SFH3 OS=Arabidopsis thaliana GN=SFH3 PE=2 SV=1
	c56380_g1	0.0813215	-3.62022
	c55594_g1	0.0811154	-3.62388	O04953	Putative pectinesterase 52 OS=Arabidopsis thaliana GN=PME52 PE=2 SV=2
	c107154_g1	0.0810109	-3.62574
	c62109_g3	0.0809434	-3.62694	Q8GX47	Putative clathrin assembly protein At4g02650 OS=Arabidopsis thaliana GN=At4g02650 PE=2 SV=2
	c24264_g1	0.0807975	-3.62954	P10978	Retrovirus-related Pol polyprotein from transposon TNT 1-94 OS=Nicotiana tabacum PE=2 SV=1
	c17626_g1	0.0807216	-3.6309	Q9C9Y6	Thioredoxin H9 OS=Arabidopsis thaliana GN=TRX9 PE=1 SV=1
	c28959_g1	0.0805299	-3.63433
	c57898_g6	0.0805299	-3.63433	O49840	Protein kinase 2B, chloroplastic OS=Arabidopsis thaliana GN=APK2B PE=2 SV=1
	c134743_g1	0.0805299	-3.63433	I1M7E7	Uncharacterized protein OS=Glycine max GN=GLYMA_14G046100 PE=4 SV=1
	c39877_g1	0.0805299	-3.63433
	c63229_g1	0.0805192	-3.63452	Q9M2A0	ATPase 8, plasma membrane-type OS=Arabidopsis thaliana GN=AHA8 PE=3 SV=1
	c42529_g1	0.0803802	-3.63702	Q3EBM5	Probable aspartic protease At2g35615 OS=Arabidopsis thaliana GN=At2g35615 PE=3 SV=1
	c23896_g1	0.0802871	-3.63869	Q9FKG5	U-box domain-containing protein 51 OS=Arabidopsis thaliana GN=PUB51 PE=2 SV=2
	c29808_g1	0.0801804	-3.64061	Q42920	Pectinesterase/pectinesterase inhibitor OS=Medicago sativa PE=2 SV=1
	c120526_g1	0.0801598	-3.64098
	c61068_g3	0.0801435	-3.64127	Q3E8Z8	Putative pectinesterase/pectinesterase inhibitor 28 OS=Arabidopsis thaliana GN=PME28 PE=2 SV=1
	c64879_g1	0.0801026	-3.64201
	c63190_g3	0.0800484	-3.64298
	c35386_g1	0.0799304	-3.64511
	c107857_g1	0.0799096	-3.64549	O82730	Monogalactosyldiacylglycerol synthase 2, chloroplastic OS=Arabidopsis thaliana GN=MGD2 PE=1 SV=1
	c61980_g4	0.0798619	-3.64635	P40973	Pectate lyase OS=Lilium longiflorum PE=2 SV=1
	c53726_g1	0.0797414	-3.64853	F4IN23	Basic leucine zipper 34 OS=Arabidopsis thaliana GN=BZIP34 PE=1 SV=1
	c106541_g1	0.079387	-3.65495
	c116681_g1	0.0793667	-3.65532	P04793	17.5 kDa class I heat shock protein OS=Glycine max GN=HSP17.5-M PE=3 SV=1
	c78253_g1	0.07935	-3.65563	C0LGU0	Pollen receptor-like kinase 1 OS=Arabidopsis thaliana GN=PRK1 PE=1 SV=1
	c60069_g1	0.0792664	-3.65715	Q1ECF5	LIM domain-containing protein PLIM2b OS=Arabidopsis thaliana GN=PLIM2B PE=1 SV=1
	c57898_g2	0.0789483	-3.66295	O49840	Protein kinase 2B, chloroplastic OS=Arabidopsis thaliana GN=APK2B PE=2 SV=1
	c80671_g1	0.0789483	-3.66295
	c2411_g1	0.0789483	-3.66295
	c78912_g1	0.0789098	-3.66365
	c120432_g1	0.0788731	-3.66432
	c9561_g2	0.0786722	-3.668	Q9ZQ23	Fasciclin-like arabinogalactan protein 3 OS=Arabidopsis thaliana GN=FLA3 PE=2 SV=1
	c57024_g9	0.0786531	-3.66835	Q8GU88	Putative pleiotropic drug resistance protein 7 OS=Oryza sativa subsp. japonica GN=PDR7 PE=3 SV=1
	c52116_g4	0.0786531	-3.66835	Q38857	Xyloglucan endotransglucosylase/hydrolase protein 22 OS=Arabidopsis thaliana GN=XTH22 PE=1 SV=1
	c69256_g1	0.0785193	-3.67081
	c15821_g1	0.0785134	-3.67092	Q09011	Calcium-binding protein CAST OS=Solanum tuberosum PE=2 SV=1
	c61329_g2	0.0783726	-3.67351
	c53401_g2	0.0782383	-3.67598	Q6H9K0	Exopolygalacturonase (Fragment) OS=Platanus acerifolia GN=plaa2 PE=1 SV=1
	c40443_g1	0.0781289	-3.678	O80742	U-box domain-containing protein 19 OS=Arabidopsis thaliana GN=PUB19 PE=2 SV=1
	c121825_g1	0.0781289	-3.678	P35336	Polygalacturonase OS=Actinidia deliciosa PE=2 SV=1
	c63300_g2	0.0781289	-3.678	Q9FMP5	Calcium-dependent protein kinase 17 OS=Arabidopsis thaliana GN=CPK17 PE=2 SV=1
	c16991_g1	0.0781275	-3.67803	Q6R2K1	Protein STRUBBELIG-RECEPTOR FAMILY 5 OS=Arabidopsis thaliana GN=SRF5 PE=2 SV=1
	c79067_g1	0.0780616	-3.67924	Q9SSD1	Protein TOO MANY MOUTHS OS=Arabidopsis thaliana GN=TMM PE=1 SV=1
	c59131_g3	0.0780204	-3.68	G7L452	Calcium/lipid-binding (CaLB) phosphatase OS=Medicago truncatula GN=MTR_7g012250 PE=4 SV=1
	c63406_g3	0.0779101	-3.68205	Q9T020	Probable receptor-like protein kinase At4g39110 OS=Arabidopsis thaliana GN=At4g39110 PE=3 SV=1
	c78252_g1	0.0778353	-3.68343	P29057	3-hydroxy-3-methylglutaryl-coenzyme A reductase 1 OS=Hevea brasiliensis GN=HMGR1 PE=2 SV=1
	c38646_g2	0.077631	-3.68722
	c10793_g1	0.0774971	-3.68971	Q9ZP41	EG45-like domain containing protein OS=Citrus jambhiri GN=CjBAp12 PE=1 SV=1
	c122957_g1	0.0773866	-3.69177	Q9FYK2	Probable calcium-binding protein CML25 OS=Arabidopsis thaliana GN=CML25 PE=2 SV=1
	c61889_g11	0.0773796	-3.6919	Q9SFT7	Serine/threonine-protein kinase At3g07070 OS=Arabidopsis thaliana GN=At3g07070 PE=2 SV=1
	c47789_g2	0.0773605	-3.69226
	c120369_g1	0.0773573	-3.69232	P26792	Beta-fructofuranosidase, insoluble isoenzyme 1 OS=Daucus carota GN=INV1 PE=1 SV=1
	c25047_g2	0.0772082	-3.6951	Q96471	S-adenosylmethionine decarboxylase proenzyme OS=Ipomoea nil GN=SAMDC PE=3 SV=1
	c55042_g3	0.0770366	-3.69831	Q9FJ21	Probable pectinesterase/pectinesterase inhibitor 58 OS=Arabidopsis thaliana GN=PME58 PE=2 SV=1
	c34404_g1	0.0770334	-3.69837
	c16058_g2	0.0769986	-3.69902
	c122515_g1	0.0769986	-3.69902
	c55528_g1	0.0769471	-3.69999	Q9LHS0	Putative clathrin assembly protein At5g35200 OS=Arabidopsis thaliana GN=At5g35200 PE=1 SV=1
	c136066_g1	0.0769413	-3.7001	Q9FY61	Trafficking protein particle complex II-specific subunit 120 homolog OS=Arabidopsis thaliana GN=TRS120 PE=1 SV=1
	c848_g1	0.0769413	-3.7001	Q9SYY4	Elongation of fatty acids protein 3-like OS=Arabidopsis thaliana GN=HOS3 PE=2 SV=1
	c43318_g1	0.0769413	-3.7001	Q7Y201	Probable pectinesterase/pectinesterase inhibitor 13 OS=Arabidopsis thaliana GN=PME13 PE=2 SV=2
	c48255_g1	0.0769413	-3.7001
	c53195_g1	0.0769413	-3.7001
	c41873_g1	0.0769413	-3.7001	Q8GX23	Proline-rich receptor-like protein kinase PERK5 OS=Arabidopsis thaliana GN=PERK5 PE=2 SV=1
	c9834_g1	0.076808	-3.7026	F4KEW8	Protein NETWORKED 4A OS=Arabidopsis thaliana GN=NET4A PE=2 SV=1
	c64060_g1	0.0767391	-3.70389	Q9LUN4	Cation/H(+) antiporter 19 OS=Arabidopsis thaliana GN=CHX19 PE=2 SV=1
	c64532_g1	0.0767084	-3.70447
	c2629_g1	0.0766664	-3.70526
	c92518_g1	0.0765342	-3.70775	Q8GXE9	HVA22-like protein j OS=Arabidopsis thaliana GN=HVA22J PE=2 SV=2
	c34421_g2	0.0764315	-3.70969
	c124278_g1	0.0764315	-3.70969
	c37280_g1	0.0763826	-3.71061	Q9LFD5	Binding partner of ACD11 1 OS=Arabidopsis thaliana GN=BPA1 PE=1 SV=1
	c106279_g1	0.0760843	-3.71626	Q9SIT5	Cation/H(+) antiporter 15 OS=Arabidopsis thaliana GN=CHX15 PE=2 SV=1
	c46442_g1	0.0760339	-3.71721	P15722	Probable pectate lyase P59 OS=Solanum lycopersicum GN=LAT59 PE=2 SV=1
	c65186_g1	0.0759662	-3.7185	Q40374	Pathogenesis-related protein PR-1 OS=Medicago truncatula GN=PR-1 PE=2 SV=1
	c47652_g2	0.0759073	-3.71962	A0A0B2SPY1	LMBR1 domain-containing protein 2 like A OS=Glycine soja GN=glysoja_034605 PE=4 SV=1
	c61740_g5	0.075867	-3.72038	Q9SZL9	Cellulose synthase-like protein D4 OS=Arabidopsis thaliana GN=CSLD4 PE=2 SV=1
	c134928_g1	0.0757524	-3.72256
	c38838_g1	0.0757284	-3.72302
	c51203_g1	0.0756209	-3.72507	Q9FG72	Oligopeptide transporter 1 OS=Arabidopsis thaliana GN=OPT1 PE=2 SV=1
	c63476_g6	0.0754123	-3.72906
	c62021_g2	0.0753859	-3.72956	C0LGQ4	Probable LRR receptor-like serine/threonine-protein kinase MRH1 OS=Arabidopsis thaliana GN=MRH1 PE=2 SV=1
	c134746_g1	0.0753032	-3.73115	Q9SS67	Peroxidase 28 OS=Arabidopsis thaliana GN=PER28 PE=2 SV=1
	c55969_g2	0.0752998	-3.73121	Q3E8Z8	Putative pectinesterase/pectinesterase inhibitor 28 OS=Arabidopsis thaliana GN=PME28 PE=2 SV=1
	c106313_g1	0.0752137	-3.73286	Q7Y201	Probable pectinesterase/pectinesterase inhibitor 13 OS=Arabidopsis thaliana GN=PME13 PE=2 SV=2
	c62819_g3	0.0750202	-3.73658	Q9SCU9	Beta-galactosidase 13 OS=Arabidopsis thaliana GN=BGAL13 PE=2 SV=1
	c122228_g1	0.075002	-3.73693	Q9SK27	Early nodulin-like protein 1 OS=Arabidopsis thaliana GN=At2g25060 PE=1 SV=2
	c61980_g2	0.0748312	-3.74022	P40973	Pectate lyase OS=Lilium longiflorum PE=2 SV=1
	c45986_g2	0.07475	-3.74178
	c93911_g1	0.0747015	-3.74272	Q84WM7	Pectinesterase PPME1 OS=Arabidopsis thaliana GN=PPME1 PE=1 SV=1
	c120741_g1	0.0747012	-3.74273	Q9LEQ3	Putative cyclic nucleotide-gated ion channel 18 OS=Arabidopsis thaliana GN=CNGC18 PE=3 SV=1
	c120392_g1	0.0746789	-3.74316	O49813	Olee1-like protein OS=Betula pendula PE=2 SV=1
	c47201_g1	0.0746708	-3.74331
	c34653_g1	0.0746706	-3.74332	K7KHU9	Uncharacterized protein OS=Glycine max GN=GLYMA_04G031800 PE=4 SV=1
	c83760_g1	0.0746622	-3.74348	Q8L586	Uncharacterized membrane protein At4g09580 OS=Arabidopsis thaliana GN=At4g09580 PE=1 SV=1
	c54224_g1	0.0744832	-3.74694
	c38161_g1	0.0744323	-3.74793	Q9C9X3	Annexin D5 OS=Arabidopsis thaliana GN=ANN5 PE=2 SV=2
	c55042_g2	0.0743918	-3.74871	Q8GX86	Probable pectinesterase/pectinesterase inhibitor 21 OS=Arabidopsis thaliana GN=PME21 PE=2 SV=2
	c61068_g5	0.0743244	-3.75002	Q42920	Pectinesterase/pectinesterase inhibitor OS=Medicago sativa PE=2 SV=1
	c25047_g1	0.0742665	-3.75115	Q96471	S-adenosylmethionine decarboxylase proenzyme OS=Ipomoea nil GN=SAMDC PE=3 SV=1
	c57037_g1	0.0741776	-3.75287
	c58059_g1	0.0740347	-3.75565	Q9ZRA4	Auxin-binding protein ABP19a OS=Prunus persica GN=ABP19A PE=3 SV=1
	c37048_g2	0.0739784	-3.75675
	c46595_g2	0.0739784	-3.75675
	c51982_g1	0.0738901	-3.75848
	c18792_g1	0.0738901	-3.75848
	c61495_g2	0.0737323	-3.76156	Q944A9	Novel plant SNARE 11 OS=Arabidopsis thaliana GN=NPSN11 PE=1 SV=2
	c64211_g1	0.0737115	-3.76197	Q9FKG5	U-box domain-containing protein 51 OS=Arabidopsis thaliana GN=PUB51 PE=2 SV=2
	c32349_g1	0.0736103	-3.76395	Q9SFC6	Rho GDP-dissociation inhibitor 1 OS=Arabidopsis thaliana GN=GDI1 PE=1 SV=1
	c112599_g1	0.0733947	-3.76818
	c122464_g1	0.0733694	-3.76868
	c52878_g2	0.0733694	-3.76868	Q9SHH6	Glutathione S-transferase U24 OS=Arabidopsis thaliana GN=GSTU24 PE=2 SV=1
	c46530_g1	0.0733694	-3.76868
	c134689_g1	0.0733633	-3.7688	P43297	Cysteine proteinase RD21a OS=Arabidopsis thaliana GN=RD21A PE=1 SV=1
	c3667_g1	0.0732734	-3.77057	A0A151R7E6	Retrotransposable element Tf2 (Fragment) OS=Cajanus cajan GN=KK1_040325 PE=4 SV=1
	c106421_g1	0.0732731	-3.77057
	c121721_g1	0.0732033	-3.77195	Q42556	ATPase 9, plasma membrane-type OS=Arabidopsis thaliana GN=AHA9 PE=2 SV=2
	c120746_g1	0.0731776	-3.77245	P35694	Xyloglucan endotransglucosylase/hydrolase 2 OS=Glycine max PE=2 SV=1
	c136281_g1	0.0730921	-3.77414	A0A072TH41	MAP3K-like kinase OS=Medicago truncatula GN=MTR_0154s0020 PE=3 SV=1
	c53356_g1	0.0730921	-3.77414	B6TYV8	Cell number regulator 2 OS=Zea mays GN=CNR2 PE=2 SV=1
	c106266_g1	0.0730633	-3.77471	Q00624	L-ascorbate oxidase homolog OS=Brassica napus GN=Bp10 PE=2 SV=1
	c38675_g1	0.0729312	-3.77732	Q9AT54	Scopoletin glucosyltransferase OS=Nicotiana tabacum GN=TOGT1 PE=1 SV=1
	c59131_g2	0.0729312	-3.77732	G7L452	Calcium/lipid-binding (CaLB) phosphatase OS=Medicago truncatula GN=MTR_7g012250 PE=4 SV=1
	c58881_g1	0.0729049	-3.77784	Q9LJ64	Pollen-specific leucine-rich repeat extensin-like protein 1 OS=Arabidopsis thaliana GN=PEX1 PE=2 SV=1
	c143131_g1	0.0728321	-3.77928	Q96303	Inorganic phosphate transporter 1-4 OS=Arabidopsis thaliana GN=PHT1-4 PE=1 SV=1
	c80546_g1	0.0728321	-3.77928
	c39638_g1	0.0728321	-3.77928	Q94AZ2	Sugar transport protein 13 OS=Arabidopsis thaliana GN=STP13 PE=1 SV=2
	c35088_g2	0.0727632	-3.78065
	c61068_g7	0.0727232	-3.78144	Q42920	Pectinesterase/pectinesterase inhibitor OS=Medicago sativa PE=2 SV=1
	c59435_g1	0.0726241	-3.78341	Q40193	Ras-related protein Rab11C OS=Lotus japonicus GN=RAB11C PE=2 SV=1
	c47919_g1	0.0725784	-3.78432	Q8LFP7	Aquaporin NIP1-2 OS=Arabidopsis thaliana GN=NIP1-2 PE=2 SV=2
	c59506_g1	0.072544	-3.785	Q9LJU0	COBRA-like protein 10 OS=Arabidopsis thaliana GN=COBL10 PE=2 SV=1
	c60565_g1	0.0725131	-3.78562	Q94AZ2	Sugar transport protein 13 OS=Arabidopsis thaliana GN=STP13 PE=1 SV=2
	c16081_g1	0.0724901	-3.78607
	c134862_g1	0.072382	-3.78823
	c50472_g1	0.07231	-3.78966	C0LGU0	Pollen receptor-like kinase 1 OS=Arabidopsis thaliana GN=PRK1 PE=1 SV=1
	c59134_g5	0.0722367	-3.79113	Q9M0M2	ABC transporter B family member 9 OS=Arabidopsis thaliana GN=ABCB9 PE=3 SV=2
	c22489_g1	0.0721732	-3.79239
	c120469_g1	0.0721174	-3.79351
	c60520_g5	0.0719974	-3.79591	Q9SMY6	Putative pectinesterase/pectinesterase inhibitor 45 OS=Arabidopsis thaliana GN=PME45 PE=2 SV=1
	c63161_g3	0.0719096	-3.79767
	c52739_g2	0.0717281	-3.80132	K7N4L6	Uncharacterized protein OS=Glycine max GN=GLYMA_20G199700 PE=4 SV=1
	c63476_g3	0.0717267	-3.80135
[truncated: 430 more rows]

## Sheet:  Table S11
Table S11. List and annotation of common DEGs identified in all three comparison of libraries FAB vs FNAB, FPAB vs FPNAB, PAB vs PNAB with FPKM (Fragment Per Kilobase of exon per Million fragments mapped) in each libraries.
[truncated: 31 more rows]

[truncated: 3 more sheets: Table S12, Table S13, Table S14]
